# Supplementary material for: Integration of Transcriptomic And Proteomic Analyses Reveals Several Levels of Metabolic Regulation In The Excess Starch And Early Senescent Leaf Mutant lses1 In Rice
Source: Research Square preprint supplement (doi:10.21203/rs.3.rs-805903/v1), 2021-09-14
Supplement: Supplementary file 1 [file 1d89d8e2236c9964844e290b.xlsx]

## Sheet: Proteins
Protein ID	Accession	-10lgP	abundance in WT	abundance in lses1	fold change	Description
12736	tr|A2Y7W1|A2Y7W1_ORYSI	192.44	9903	18630	1.88	Glucose-1-phosphate adenylyltransferase OS=Oryza sativa subsp. indica OX=39946 GN=AGPlar PE=3 SV=1
9542	tr|B8BE16|B8BE16_ORYSI	260.58	3260	8250	2.53	Glucose-1-phosphate adenylyltransferase OS=Oryza sativa subsp. indica OX=39946 GN=AGPsma PE=3 SV=1
8849	tr|D0TZE6|D0TZE6_ORYSI	296	109900	195500	1.78	Granule-bound starch synthase II chloroplastic/amyloplastic OS=Oryza sativa subsp. indica OX=39946 GN=GBSSII PE=3 SV=1
17090	tr|D0TZM7|D0TZM7_ORYSI	111.06	4516	8080	1.79	Starch synthase chloroplastic/amyloplastic OS=Oryza sativa subsp. indica OX=39946 GN=SSI PE=3 SV=1
17097	A2Y9M4|SSY1_ORYSI	111.06	4516	8080	1.79	Soluble starch synthase 1 chloroplastic/amyloplastic OS=Oryza sativa subsp. indica OX=39946 GN=OsI_021017 PE=2 SV=1
17785	P0C360|PSAC_ORYSI	239.32	405900	628700	1.55	Photosystem I iron-sulfur center OS=Oryza sativa subsp. indica OX=39946 GN=psaC PE=3 SV=1
26252	tr|B8B9Z2|B8B9Z2_ORYSI	55.21	1106	1696	1.53	Pyrophosphate--fructose 6-phosphate 1-phosphotransferase subunit alpha OS=Oryza sativa subsp. indica OX=39946 GN=PFP-ALPHA PE=3 SV=1
14652	tr|A6N0K0|A6N0K0_ORYSI	220.86	224.5	648.465	2.89	Glyceraldehyde-3-phosphate dehydrogenase (Fragment) OS=Oryza sativa subsp. indica OX=39946 PE=2 SV=1
18103	tr|H6ST15|H6ST15_ORYSI	120.2	1192	2666	2.24	Trehalose-6-phosphate synthase 3 OS=Oryza sativa subsp. indica OX=39946 GN=TPS3 PE=2 SV=1
10190	tr|A2YVI5|A2YVI5_ORYSI	261.1	6032	9768	1.62	Malate dehydrogenase OS=Oryza sativa subsp. indica OX=39946 GN=OsI_29345 PE=3 SV=1
12397	tr|B8AYU7|B8AYU7_ORYSI	191.9	12860	19610	1.52	Aldo-keto reductase OS=Oryza sativa subsp. indica OX=39946 GN=AKR4 PE=2 SV=1
26934	Q53JF7|ASR5_ORYSJ	75.75	3110	4774	1.54	Abscisic stress-ripening protein 5 OS=Oryza sativa subsp. indica OX=39946 GN=ASR5 PE=2 SV=1
19476	tr|Q84P57|Q84P57_ORYSI	141.38	3494	5579	1.6	Adenine phosphoribosyltransferase form 2 APRT OS=Oryza sativa subsp. indica OX=39946 PE=2 SV=1
16436	P0C5D6|SAPK3_ORYSJ	160.54	559.5	1605	2.87	Serine/threonine-protein kinase SAPK3 OS=Oryza sativa subsp. indica OX=39946 GN=SAPK3 PE=1 SV=2
28721	Q7XTQ5|MEX1_ORYSJ	43.99	142.5	372.276	2.61	Maltose excess protein 1-like chloroplastic OS=Oryza sativa subsp. japonica OX=39947 GN=Os04g0602400 PE=2 SV=2
12268	P31924|SUS1_ORYSJ	186.64	3826	4845	1.27	Sucrose synthase 1 OS=Oryza sativa subsp. japonica OX=39947 GN=SUS1 PE=1 SV=1
9103	A2YQL4|SCRK2_ORYSI	291.02	140500	153700	1.1	Fructokinase-2 OS=Oryza sativa subsp. indica OX=39946 GN=FRK2 PE=1 SV=2
8812	tr|A0A188I036|A0A188I036_ORYSJ	288.52	7816	10400	1.33	Pyruvate kinase OS=Oryza sativa subsp. japonica OX=39947 PE=2 SV=1
11582	Q2R8Z5|ADH1_ORYSJ	189.75	25740	27640	1.07	Alcohol dehydrogenase 1 OS=Oryza sativa subsp. japonica OX=39947 GN=ADH1 PE=2 SV=2
12828	Q01MI9|APX3_ORYSI	209.35	9923	7136	0.72	Probable L-ascorbate peroxidase 3 OS=Oryza sativa subsp. indica OX=39946 GN=APX3 PE=2 SV=1
10525	Q10N21|APX1_ORYSJ	321.53	291200	275400	0.95	L-ascorbate peroxidase 1 cytosolic OS=Oryza sativa subsp. japonica OX=39947 GN=APX1 PE=1 SV=1
29831	tr|B8BEN8|B8BEN8_ORYSI	30.64	685.5	487.194	0.71	Beta-amylase OS=Oryza sativa subsp. indica OX=39946 GN=OsI_32458 PE=3 SV=1
29598	Q2QYL2|NLT2B_ORYSJ	40.88	566	346.685	0.61	Non-specific lipid-transfer protein 2B OS=Oryza sativa subsp. japonica OX=39947 GN=LTP2-B PE=2 SV=1
21289	tr|A0A0U1XN36|A0A0U1XN36_ORYSI	119.69	1500	2261	1.51	ABA receptor 5 OS=Oryza sativa subsp. indica OX=39946 GN=ABAR5/PYL5 PE=2 SV=1
26933	tr|A6N0H8|A6N0H8_ORYSI	75.75	3110	4774	1.54	Abscisic stress ripening protein 2 (Fragment) OS=Oryza sativa subsp. indica OX=39946 PE=2 SV=1

## Sheet: Genes
gene	D1(lses1)_count	D2(lses1)_count	D3(lses1)_count	C1(WT)_count	C2(WT)_count	C3(WT)_count	Fold Change	pval	Up/Down	Description	GO:biological_process	GO:cellular_component	GO:molecular_function
BGIOSGA002871	22	6	6	45	30	17	0.283836	0.00906624	down	ABC_transporter, partial [Triticum aestivum]	.	GO:0048046|apoplast;GO:0016021|integral component of membrane;GO:0000325|plant-type vacuole;GO:0009506|plasmodesma;GO:0005774|vacuolar membrane;GO:0005773|vacuole;	GO:0005524|ATP binding;GO:0042626|ATPase activity, coupled to transmembrane movement of substances;GO:0010290|chlorophyll catabolite transmembrane transporter activity;GO:0015431|glutathione S-conjugate-exporting ATPase activity;GO:0008559|xenobiotic-transporting ATPase activity;
BGIOSGA029383	763	1027	572	1625	1317	2295	0.352964	1.26358e-06	down	Protein STAY-GREEN, chloroplastic	.	GO:0009507|chloroplast;	.
BGIOSGA032011	375	355	802	48	43	151	4.80487	8.53658e-07	up	Putative red chlorophyll catabolite reductase,rccR	GO:0015996|chlorophyll catabolic process;	GO:0009570|chloroplast stroma;	GO:0016491|oxidoreductase activity;
BGIOSGA031535	52	54	96	18	13	16	3.21334	7.4685e-05	up	Probable trehalase	GO:0005993|trehalose catabolic process;	GO:0005886|plasma membrane;	GO:0004555|alpha,alpha-trehalase activity;
BGIOSGA010570	56	159	1051	8	13	4	5.09326	1.65298e-05	up	Sucrose synthase 1	GO:0010037|response to carbon dioxide;GO:0005985|sucrose metabolic process;	.	GO:0016157|sucrose synthase activity;
BGIOSGA010770	321	364	1033	109	89	138	3.75304	1.57845e-06	up	sucrose synthase 4	GO:0005985|sucrose metabolic process;	.	GO:0016157|sucrose synthase activity;
BGIOSGA027913	8889	10202	21076	3559	3064	4442	2.69396	8.92546e-07	up	glyceraldehyde-3-phosphate dehydrogenase 1, cytosolic GAPC	GO:0006006|glucose metabolic process;GO:0006096|glycolytic process;	GO:0005737|cytoplasm;	GO:0004365|glyceraldehyde-3-phosphate dehydrogenase (NAD+) (phosphorylating) activity;GO:0051287|NAD binding;GO:0050661|NADP binding;
BGIOSGA027875	844	924	3616	381	310	372	3.64803	3.38955e-05	up	fructokinase-2 FRK2	GO:0019252|starch biosynthetic process;	.	GO:0005524|ATP binding;GO:0008865|fructokinase activity;
BGIOSGA012569	1533	1370	1181	2869	2404	2151	0.41967	3.38111e-07	down	partial phospholipid-transporting ATPase 1 ALA1	.	GO:0005789|endoplasmic reticulum membrane;GO:0016021|integral component of membrane;GO:0016020|membrane;GO:0005886|plasma membrane;	GO:0005524|ATP binding;GO:0000287|magnesium ion binding;GO:0004012|phospholipid-translocating ATPase activity;
BGIOSGA011591	9	7	31	0	0	2	17.378	0.00323627	up	Non-specific lipid-transfer protein 2, nsLTP2	GO:0006869|lipid transport;	.	GO:0008289|lipid binding;
BGIOSGA005287	8	4	25	0	0	0	48.2587	0.000561425	up	putative senescence-associated protein 5 TET6	GO:0035265|organ growth;	GO:0016021|integral component of membrane;	.
BGIOSGA015546	38	40	91	9	4	11	5.27306	2.19385e-05	up	Probable L-ascorbate peroxidase 3, APX3	GO:0042744|hydrogen peroxide catabolic process;GO:0006979|response to oxidative stress;	GO:0016021|integral component of membrane;	GO:0020037|heme binding;GO:0016688|L-ascorbate peroxidase activity;GO:0046872|metal ion binding;
BGIOSGA031378	18834	12483	9019	23533	22811	17107	0.486852	0.00241429	down	chlorophyllide a oxygenase, chloroplastic CAO	GO:0015995|chlorophyll biosynthetic process;	GO:0031969|chloroplast membrane;GO:0009535|chloroplast thylakoid membrane;	GO:0051537|2 iron, 2 sulfur cluster binding;GO:0010277|chlorophyllide a oxygenase [overall] activity;GO:0005506|iron ion binding;GO:0016705|oxidoreductase activity, acting on paired donors, with incorporation or reduction of molecular oxygen;
BGIOSGA034870	599	606	899	192	169	241	2.63468	8.29672e-11	up	Cytochrome bc1 complex subunit 6	GO:0006122|mitochondrial electron transport, ubiquinol to cytochrome c;	GO:0005743|mitochondrial inner membrane;GO:0070469|respiratory chain;	GO:0008121|ubiquinol-cytochrome-c reductase activity;
BGIOSGA024764	357	373	794	101	85	107	3.85077	4.06737e-10	up	putative aldehyde oxidase AO3	GO:0009688|abscisic acid biosynthetic process;GO:0009851|auxin biosynthetic process;GO:0009115|xanthine catabolic process;	GO:0005829|cytosol;	GO:0051537|2 iron, 2 sulfur cluster binding;GO:0004031|aldehyde oxidase activity;GO:0009055|electron carrier activity;GO:0050660|flavin adenine dinucleotide binding;GO:0005506|iron ion binding;GO:0016614|oxidoreductase activity, acting on CH-OH group of donors;GO:0016903|oxidoreductase activity, acting on the aldehyde or oxo group of donors;GO:0004854|xanthine dehydrogenase activity;
BGIOSGA031385	414	229	204	1029	1038	714	0.231779	5.18023e-09	down	beta-amylase 3, chloroplastic, BAM3	GO:0000024|maltose biosynthetic process;GO:0009409|response to cold;GO:0005983|starch catabolic process;	GO:0009570|chloroplast stroma;	GO:0016161|beta-amylase activity;
BGIOSGA012374	266	249	423	83	73	127	2.50013	3.21744e-06	up	L-ascorbate peroxidase 1, cytosolic	GO:0034599|cellular response to oxidative stress;GO:0042744|hydrogen peroxide catabolic process;GO:0000302|response to reactive oxygen species;	GO:0009507|chloroplast;	GO:0004130|cytochrome-c peroxidase activity;GO:0020037|heme binding;GO:0016688|L-ascorbate peroxidase activity;GO:0046872|metal ion binding;
BGIOSGA014411	433	343	488	77	55	59	5.00084	1.35784e-20	up	Maltose excess protein 1-like, chloroplastic,MEX1	GO:0000023|maltose metabolic process;GO:0006810|transport;	GO:0009706|chloroplast inner membrane;GO:0016021|integral component of membrane;	.
BGIOSGA001898	191	238	353	75	71	110	2.29784	3.32486e-05	up	Pyruvate kinase, cytosolic isozyme,PK	.	GO:0005737|cytoplasm;	GO:0005524|ATP binding;GO:0016301|kinase activity;GO:0000287|magnesium ion binding;GO:0030955|potassium ion binding;GO:0004743|pyruvate kinase activity;
BGIOSGA031063	751	834	1179	282	243	320	2.46242	1.61908e-10	up	Pyruvate dehydrogenase E1 component subunit beta-2, mitochondrial,PDHE1-B	GO:0006086|acetyl-CoA biosynthetic process from pyruvate;GO:0006096|glycolytic process;	GO:0005759|mitochondrial matrix;	GO:0004739|pyruvate dehydrogenase (acetyl-transferring) activity;
BGIOSGA022620	109	121	589	17	16	16	11.8868	1.12898e-09	up	Pyruvate dehydrogenase E1 component subunit alpha-2, mitochondrial,PDHE1-A	GO:0006086|acetyl-CoA biosynthetic process from pyruvate;GO:0006096|glycolytic process;	GO:0005759|mitochondrial matrix;	GO:0004739|pyruvate dehydrogenase (acetyl-transferring) activity;
BGIOSGA018692	74	68	117	0	0	0	350.182	1.17045e-11	up	Pyruvate decarboxylase 3,PDC3	.	.	GO:0000287|magnesium ion binding;GO:0004737|pyruvate decarboxylase activity;GO:0030976|thiamine pyrophosphate binding;
BGIOSGA034312	673	924	2392	381	323	525	2.3859	0.00131498	up	Alcohol dehydrogenase 1	.	GO:0005737|cytoplasm;	GO:0004022|alcohol dehydrogenase (NAD) activity;GO:0008270|zinc ion binding;
BGIOSGA031386	831	959	1851	300	166	361	3.31955	1.02942e-07	up	serine/threonine-protein kinase, SAPK3	GO:0009738|abscisic acid-activated signaling pathway;GO:0035556|intracellular signal transduction;GO:0006468|protein phosphorylation;	GO:0005737|cytoplasm;GO:0005634|nucleus;	GO:0005524|ATP binding;GO:0004674|protein serine/threonine kinase activity;
BGIOSGA017490	3512	5315	25093	40	60	69	141.727	1.52942e-17	up	glucose-1-phosphate adenylyltransferase large subunit, chloroplastic/amyloplastic,AGP-L	GO:0005978|glycogen biosynthetic process;GO:0019252|starch biosynthetic process;	GO:0009501|amyloplast;GO:0009507|chloroplast;	GO:0005524|ATP binding;GO:0008878|glucose-1-phosphate adenylyltransferase activity;
BGIOSGA021860	2896	2311	2386	1252	1475	1208	1.45519	0.0265681	up	soluble starch synthase I precursor, SSSI	GO:0019252|starch biosynthetic process;	GO:0009501|amyloplast;GO:0009507|chloroplast;	GO:0033201|alpha-1,4-glucan synthase activity;GO:0004373|glycogen (starch) synthase activity;GO:0009011|starch synthase activity;
BGIOSGA028505	859	988	1655	517	286	515	2.00756	0.000311663	up	pyrophosphate--fructose 6-phosphate 1-phosphotransferase subunit alpha, AGP-L	.	GO:0005737|cytoplasm;	GO:0003872|6-phosphofructokinase activity;GO:0005524|ATP binding;GO:0047334|diphosphate-fructose-6-phosphate 1-phosphotransferase activity;GO:0046872|metal ion binding;
BGIOSGA004392	1192	1144	1673	864	861	889	1.14717	0.292124	up	Oryza sativa Indica Group trehalose-6-phosphate synthase 3,TPS3	GO:0005992|trehalose biosynthetic process;GO:0070413|trehalose metabolism in response to stress;	GO:0005829|cytosol;	GO:0016791|phosphatase activity;GO:0016757|transferase activity, transferring glycosyl groups;
BGIOSGA033135	42	42	78	28	38	34	1.19631	0.521198	up	malate dehydrogenase, cytoplasmic,MDH	GO:0005975|carbohydrate metabolic process;GO:0006108|malate metabolic process;GO:0006734|NADH metabolic process;GO:0006107|oxaloacetate metabolic process;GO:0006099|tricarboxylic acid cycle;	GO:0005737|cytoplasm;	GO:0030060|L-malate dehydrogenase activity;
BGIOSGA016724	1197	2109	1880	853	703	1064	1.51339	0.0218584	up	adenine phosphoribosyltransferase 2,APRT	GO:0006168|adenine salvage;GO:0044209|AMP salvage;	GO:0005829|cytosol;GO:0005794|Golgi apparatus;GO:0005886|plasma membrane;	GO:0003999|adenine phosphoribosyltransferase activity;GO:0015114|phosphate ion transmembrane transporter activity;
BGIOSGA029630	17	9	18	1	8	4	2.46777	0.132821	up	cyclin-dependent kinase inhibitor 6, KRP6	GO:0007050|cell cycle arrest;	GO:0005634|nucleus;	GO:0004861|cyclin-dependent protein serine/threonine kinase inhibitor activity;
