# Supplementary material for: Integration of Transcriptomic And Proteomic Analyses Reveals Several Levels of Metabolic Regulation In The Excess Starch And Early Senescent Leaf Mutant lses1 In Rice
Source: Research Square preprint supplement (doi:10.21203/rs.3.rs-805903/v1), 2021-09-14
Supplement: Supplementary file 2 [file 649477805f4fb7a20a422a81.xlsx]

## Sheet: Differentially expressed genes
gene	D1(lses1 Repeat 1)_count	D2(lses1 Repeat 2)_count	D3(lses1 Repeat 3)_count	C1(WT Repeat 1)_count	C2(WT Repeat 2)_count	C3(WT Repeat 3)_count	FoldChange	pval	Up/Down	Description
BGIOSGA028550	18	25	28	2365	1960	2586	0.00779656	6.2612e-169	down	PREDICTED: multiprotein-bridging factor 1a [Oryza sativa Japonica Group]
BGIOSGA005362	55	57	64	2581	2807	2957	0.0158955	1.93917e-164	down	hypothetical protein OsI_09446 [Oryza sativa Indica Group]
BGIOSGA028551	3604	5395	5476	5	12	12	376.327	1.08117e-116	up	PREDICTED: multiprotein-bridging factor 1a [Oryza sativa Japonica Group]
BGIOSGA036883	5151	6048	7735	5	2	7	1023.08	3.42563e-113	up	PREDICTED: non-specific lipid-transfer protein 1 [Oryza sativa Japonica Group]
BGIOSGA030181	17	21	4	3770	3358	4854	0.00273591	1.01792e-102	down	zinc finger protein-like [Oryza sativa Japonica Group]
BGIOSGA014978	34	7	12	10321	19277	16129	0.000874476	2.30141e-98	down	PREDICTED: chlorophyll a-b binding protein CP24, chloroplastic [Oryza sativa Japonica Group]
BGIOSGA020520	4046	4350	3953	205	185	201	15.9321	7.01931e-90	up	hypothetical protein OsI_24491 [Oryza sativa Indica Group]
BGIOSGA011308	55	53	89	1177	1111	1150	0.0428168	5.606e-86	down	hypothetical protein OsI_10323 [Oryza sativa Indica Group]
BGIOSGA030097	13379	9680	7218	159	125	133	56.1257	1.05351e-79	up	hypothetical protein OsI_30658 [Oryza sativa Indica Group]
BGIOSGA023098	11	6	7	695	722	810	0.00815703	8.01763e-79	down	hypothetical protein OsI_23393 [Oryza sativa Indica Group]
BGIOSGA030180	16	17	3	2388	2006	1687	0.00456584	1.13219e-74	down	hypothetical protein OsI_30490 [Oryza sativa Indica Group]
BGIOSGA011029	1032	1057	1341	4	6	5	172.428	1.77705e-68	up	hypothetical protein OsI_10906 [Oryza sativa Indica Group]
BGIOSGA002379	10	8	7	498	525	580	0.0118077	2.71397e-68	down	RecName: Full=Histone H2B.10
BGIOSGA005250	56	78	100	896	754	977	0.0672156	8.29181e-65	down	hypothetical protein OsI_05354 [Oryza sativa Indica Group]
BGIOSGA016149	1189	929	1659	7	2	13	130.161	2.74091e-63	up	hypothetical protein OsI_15399 [Oryza sativa Indica Group]
BGIOSGA002380	8	6	3	572	585	880	0.00639847	6.69855e-62	down	PREDICTED: histone H2B.8 [Oryza sativa Japonica Group]
BGIOSGA022129	35	39	35	473	513	629	0.0512993	7.91228e-60	down	hypothetical protein OsI_21274 [Oryza sativa Indica Group]
BGIOSGA008884	632	606	674	6	10	13	50.0811	7.08178e-59	up	hypothetical protein OsI_08610 [Oryza sativa Indica Group]
BGIOSGA002512	610	661	799	3701	3601	4977	0.127788	3.0309e-58	down	hypothetical protein OsI_00138 [Oryza sativa Indica Group]
BGIOSGA017014	14	19	16	456	697	773	0.019195	1.28678e-57	down	hypothetical protein OsI_17175 [Oryza sativa Indica Group]
BGIOSGA036809	2330	1788	2088	12739	13441	14118	0.116622	7.01377e-54	down	hypothetical protein OsI_37143 [Oryza sativa Indica Group]
EPlOING00000042983	1012	964	1353	23	39	51	22.1432	1.35892e-52	up	.
BGIOSGA009017	40	27	37	407	439	491	0.0587575	1.5954e-52	down	hypothetical protein OsI_08864 [Oryza sativa Indica Group]
BGIOSGA027269	46	31	64	565	531	555	0.0638231	2.56928e-51	down	hypothetical protein OsI_28625 [Oryza sativa Indica Group]
BGIOSGA011603	2410	2182	2854	288	291	298	6.38717	8.01438e-51	up	hypothetical protein OsI_09666 [Oryza sativa Indica Group]
BGIOSGA036828	515	452	596	5	10	8	51.1754	1.48129e-50	up	hypothetical protein OsI_37104 [Oryza sativa Indica Group]
BGIOSGA006147	743	692	962	1	2	10	139.972	1.66077e-50	up	hypothetical protein OsI_07866 [Oryza sativa Indica Group]
BGIOSGA002165	21	28	16	446	334	422	0.0415371	1.66891e-50	down	hypothetical protein [Oryza sativa Japonica Group]
BGIOSGA005190	619	508	674	2672	2563	3163	0.162313	1.95294e-50	down	PREDICTED: probable NADPH:quinone oxidoreductase 2 [Oryza sativa Japonica Group]
BGIOSGA009582	6	7	13	290	274	340	0.0216651	5.90495e-50	down	PREDICTED: uncharacterized protein LOC4334544 [Oryza sativa Japonica Group]
BGIOSGA015217	1481	2411	2205	109	61	72	19.2191	9.62729e-49	up	RecName: Full=Stearoyl-[acyl-carrier-protein] 9-desaturase 5, chloroplastic; Short=Stearoyl-ACP desaturase 5; AltName: Full=Acyl-[acyl-carrier-protein] desaturase 5; Flags: Precursor
BGIOSGA021036	1647	1648	3317	2	1	3	819.555	1.69548e-48	up	hypothetical protein OsI_23378 [Oryza sativa Indica Group]
BGIOSGA027477	0	3	0	4469	3800	6491	0.000155951	5.57853e-48	down	hypothetical protein OsI_28191 [Oryza sativa Indica Group]
BGIOSGA029265	241	182	299	1353	1170	1464	0.136454	3.98483e-46	down	hypothetical protein OsI_32402 [Oryza sativa Indica Group]
BGIOSGA036321	821	700	687	38	27	22	19.3522	5.44019e-46	up	OSIGBa0132I10.2 [Oryza sativa Indica Group]
BGIOSGA027235	19	8	19	800	676	405	0.0181697	4.93256e-45	down	hypothetical protein OsI_28681 [Oryza sativa Indica Group]
BGIOSGA008697	3143	1815	3702	53	65	121	27.4068	1.32644e-44	up	hypothetical protein OsI_08234 [Oryza sativa Indica Group]
BGIOSGA007907	7	6	10	247	218	246	0.0244058	7.47276e-44	down	hypothetical protein OsI_06625 [Oryza sativa Indica Group]
BGIOSGA030063	126	122	164	655	640	802	0.148322	2.07509e-43	down	putative antigen receptor [Oryza sativa Indica Group]
BGIOSGA000094	59	85	81	543	465	535	0.110597	4.49176e-43	down	PREDICTED: uncharacterized protein LOC4325399 [Oryza sativa Japonica Group]
BGIOSGA015079	5	4	5	286	221	289	0.0133724	1.03835e-42	down	hypothetical protein OsI_15951 [Oryza sativa Indica Group]
EPlOING00000000331	11	9	5	269	221	257	0.0255618	1.10804e-42	down	hypothetical protein POPTR_0014s09690g [Populus trichocarpa]
BGIOSGA031550	783	704	1432	32	27	48	20.4114	2.31481e-42	up	hypothetical protein OsI_34329 [Oryza sativa Indica Group]
BGIOSGA018772	9	6	13	264	271	240	0.0269787	2.42204e-42	down	hypothetical protein OsI_18539 [Oryza sativa Indica Group]
BGIOSGA030523	207	243	208	1388	1454	1338	0.119205	2.97621e-42	down	PREDICTED: bifunctional protein FolD 1, mitochondrial isoform X1 [Oryza sativa Japonica Group]
BGIOSGA018040	631	472	1276	6	7	10	76.2891	5.65941e-42	up	hypothetical protein OsI_19994 [Oryza sativa Indica Group]
BGIOSGA022197	1578	1819	2885	169	103	161	10.9313	1.61484e-41	up	PREDICTED: uncharacterized protein LOC4339947 isoform X1 [Oryza sativa Japonica Group]
BGIOSGA016965	2306	2258	3172	383	346	420	5.0686	3.68765e-41	up	hypothetical protein OsI_17064 [Oryza sativa Indica Group]
BGIOSGA036014	766	667	1177	6	0	1	280.041	7.35475e-40	up	hypothetical protein OsI_38715 [Oryza sativa Indica Group]
BGIOSGA015088	517	551	1071	23	9	20	30.8617	1.49723e-39	up	hypothetical protein OsI_15940 [Oryza sativa Indica Group]
BGIOSGA028153	1	2	1	1118	805	1729	0.00084527	3.2037e-39	down	hypothetical protein OsI_28163 [Oryza sativa Indica Group]
BGIOSGA024551	10	13	13	204	185	207	0.0457047	1.66492e-38	down	hypothetical protein OsI_25470 [Oryza sativa Indica Group]
BGIOSGA030581	12	6	13	285	197	412	0.0265857	1.80404e-38	down	hypothetical protein OsI_31027 [Oryza sativa Indica Group]
BGIOSGA027085	3581	2325	3982	0	1	2	2484.55	3.33444e-38	up	hypothetical protein OsI_28996 [Oryza sativa Indica Group]
BGIOSGA016512	8421	9276	12181	1319	1331	1201	5.79187	9.30259e-38	up	hypothetical protein CARUB_v10002094mg, partial [Capsella rubella]
BGIOSGA034868	5	17	6	317	234	325	0.0246314	1.00974e-37	down	hypothetical protein OsI_35232 [Oryza sativa Indica Group]
BGIOSGA036882	28774	26831	37574	4649	4668	5791	4.64439	1.22885e-37	up	phospholipid transfer protein homolog - rice [Oryza sativa]
BGIOSGA013914	8443	16666	11218	0	0	0	50322.3	2.40305e-37	up	hypothetical protein OsI_14271 [Oryza sativa Indica Group]
BGIOSGA009515	7	3	14	249	226	408	0.0205122	8.9676e-37	down	hypothetical protein OsI_14172 [Oryza sativa Indica Group]
BGIOSGA032369	485	664	1179	22	27	29	22.0257	1.83643e-36	up	hypothetical protein OsI_32576 [Oryza sativa Indica Group]
BGIOSGA034684	23111	27948	35177	3091	3289	2656	7.0987	2.06329e-36	up	phospholipid transfer protein homolog - rice [Oryza sativa]
BGIOSGA015342	365	631	794	2	7	2	120.32	5.48492e-36	up	PREDICTED: jacalin-related lectin 9 [Oryza sativa Japonica Group]
BGIOSGA014976	87738	18320	29218	24	45	39	954.248	6.19268e-36	up	PREDICTED: chlorophyll a-b binding protein CP24, chloroplastic [Oryza sativa Japonica Group]
BGIOSGA016819	3964	3834	2899	21705	18400	26044	0.125156	6.52485e-36	down	OSIGBa0125M19.13 [Oryza sativa Indica Group]
BGIOSGA035759	513	744	1287	26	30	35	20.6711	7.72381e-36	up	hypothetical protein OsI_39269 [Oryza sativa Indica Group]
BGIOSGA019122	1888	3272	9168	51	54	87	54.3402	1.00031e-35	up	PREDICTED: uncharacterized protein LOC9266485 [Oryza sativa Japonica Group]
BGIOSGA034472	48	184	41	7449	6270	4876	0.0114357	1.40083e-35	down	hypothetical protein OsI_35171 [Oryza sativa Indica Group]
BGIOSGA000096	386	545	560	2	2	4	141.481	1.82054e-35	up	hypothetical protein OsI_05232 [Oryza sativa Indica Group]
BGIOSGA031274	0	0	0	4021	3035	5665	3.34015e-05	6.49754e-35	down	hypothetical protein OsI_32404 [Oryza sativa Indica Group]
BGIOSGA002259	390	280	155	4859	7003	5204	0.0369622	6.69882e-35	down	hypothetical protein OsI_00644 [Oryza sativa Indica Group]
BGIOSGA013809	9	6	8	209	160	171	0.0322659	1.69765e-34	down	hypothetical protein OsI_14044 [Oryza sativa Indica Group]
BGIOSGA005320	8	9	16	173	191	209	0.0431231	2.36628e-34	down	hypothetical protein OsI_09540 [Oryza sativa Indica Group]
BGIOSGA016232	5	1	1	284	246	352	0.00606192	3.93311e-34	down	hypothetical protein OsI_15595 [Oryza sativa Indica Group]
BGIOSGA023803	360	337	346	10	3	16	27.8072	1.05429e-33	up	hypothetical protein OsI_27127 [Oryza sativa Indica Group]
BGIOSGA022275	1019	1124	960	4456	3542	4299	0.193433	1.31796e-33	down	hypothetical protein OsI_21587 [Oryza sativa Indica Group]
BGIOSGA020613	13	6	10	197	199	179	0.0379322	1.59802e-33	down	PREDICTED: uncharacterized protein LOC4341930 [Oryza sativa Japonica Group]
BGIOSGA018630	1507	795	1430	1	0	3	708.696	2.36336e-33	up	hypothetical protein OsI_18816 [Oryza sativa Indica Group]
BGIOSGA036747	1645	1518	1841	0	1	2	1265.28	2.73187e-33	up	hypothetical protein OsI_37254 [Oryza sativa Indica Group]
BGIOSGA029931	1	1	4	335	290	559	0.00386331	3.03172e-33	down	hypothetical protein OsI_31004 [Oryza sativa Indica Group]
BGIOSGA023580	423	351	457	1	6	1	115.56	6.19733e-33	up	hypothetical protein OsI_24411 [Oryza sativa Indica Group]
BGIOSGA002455	513	822	435	10	15	19	31.0858	6.21859e-33	up	PREDICTED: Bowman-Birk type wound-induced proteinase inhibitor WIP1 [Oryza sativa Japonica Group]
BGIOSGA028167	723	486	325	6	4	6	74.7346	1.20998e-32	up	hypothetical protein OsI_28195 [Oryza sativa Indica Group]
BGIOSGA027044	7	1	8	183	244	354	0.0154205	1.35191e-32	down	PREDICTED: uncharacterized protein LOC4345453 [Oryza sativa Japonica Group]
BGIOSGA028413	348	286	523	6	3	1	86.371	4.44687e-32	up	hypothetical protein OsI_28694 [Oryza sativa Indica Group]
BGIOSGA008615	4	0	1	332	318	509	0.00329758	1.50508e-31	down	hypothetical protein OsI_08054 [Oryza sativa Indica Group]
BGIOSGA029259	17128	12544	32555	596	906	1198	16.9643	1.58385e-31	up	hypothetical protein OsI_32416 [Oryza sativa Indica Group]
BGIOSGA012146	238	228	329	11	9	15	17.1549	2.43634e-31	up	hypothetical protein OsI_10574 [Oryza sativa Indica Group]
BGIOSGA037850	119	138	180	698	489	737	0.172492	3.88987e-31	down	hypothetical protein OsI_39227 [Oryza sativa Indica Group]
BGIOSGA037365	1468	1240	1331	0	0	3	1030.1	7.35282e-31	up	hypothetical protein OsI_38272 [Oryza sativa Indica Group]
BGIOSGA009516	4	2	1	204	279	303	0.00673111	7.54689e-31	down	Os03g0830300 [Oryza sativa Japonica Group]
BGIOSGA034672	169	141	188	983	697	698	0.158264	1.41668e-30	down	hypothetical protein OsI_34844 [Oryza sativa Indica Group]
BGIOSGA002807	1	2	2	318	359	311	0.0037898	1.4975e-30	down	hypothetical protein OsI_00439 [Oryza sativa Indica Group]
BGIOSGA037332	2470	651	1715	16	19	42	48.2111	2.41663e-30	up	hypothetical protein OsI_38200 [Oryza sativa Indica Group]
BGIOSGA003542	1418	2466	1920	196	141	153	9.04567	4.38252e-30	up	hypothetical protein OsI_01978 [Oryza sativa Indica Group]
BGIOSGA014512	92	56	103	509	726	696	0.0967256	7.44888e-30	down	PREDICTED: protein FATTY ACID EXPORT 4, chloroplastic [Oryza sativa Japonica Group]
BGIOSGA018144	1499	2090	3289	132	144	219	10.3878	1.00225e-29	up	PREDICTED: annexin D4 [Oryza sativa Japonica Group]
BGIOSGA000352	390	316	442	30	30	19	10.8814	2.24198e-29	up	hypothetical protein OsI_04734 [Oryza sativa Indica Group]
BGIOSGA016397	31	31	30	236	167	264	0.105833	2.3755e-29	down	hypothetical protein OsI_15868 [Oryza sativa Indica Group]
BGIOSGA004722	269	267	241	1424	1930	3171	0.0915823	2.55091e-29	down	transcription factor WRKY24 [Oryza sativa Indica Group]
BGIOSGA030333	2	5	11	224	130	191	0.0249251	2.87739e-29	down	hypothetical protein OsI_30493 [Oryza sativa Indica Group]
BGIOSGA015093	3	1	0	353	353	575	0.00239293	3.47511e-29	down	hypothetical protein OsI_15925 [Oryza sativa Indica Group]
BGIOSGA029364	1986	2917	5467	0	0	0	13833.7	4.65956e-29	up	hypothetical protein OsI_32193 [Oryza sativa Indica Group]
BGIOSGA002650	240	288	229	1206	1280	1159	0.157547	6.31634e-29	down	hypothetical protein OsI_00143 [Oryza sativa Indica Group]
BGIOSGA006776	21	26	33	247	339	636	0.0498289	7.53302e-29	down	PREDICTED: uncharacterized protein LOC4328899 [Oryza sativa Japonica Group]
BGIOSGA006101	3	1	1	339	390	251	0.00380528	1.11453e-28	down	hypothetical protein OsI_07955 [Oryza sativa Indica Group]
BGIOSGA027537	301	265	451	7	10	21	20.1668	1.3138e-28	up	hypothetical protein OsI_28063 [Oryza sativa Indica Group]
BGIOSGA019117	3	2	0	268	206	345	0.00469388	3.37616e-28	down	hypothetical protein OsI_18309 [Oryza sativa Indica Group]
BGIOSGA023549	205	222	248	906	775	736	0.210644	3.6049e-28	down	hypothetical protein OsI_24346 [Oryza sativa Indica Group]
BGIOSGA016032	7	11	21	182	164	294	0.045983	3.88439e-28	down	hypothetical protein OsI_15147 [Oryza sativa Indica Group]
BGIOSGA030335	0	0	0	1548	1202	1201	0.00010586	4.08443e-28	down	hypothetical protein OsI_30495 [Oryza sativa Indica Group]
BGIOSGA014272	454	499	400	4	1	0	207.691	1.346e-27	up	H0410G08.10 [Oryza sativa Indica Group]
BGIOSGA034256	366	300	432	39	18	26	10.0501	2.48831e-27	up	hypothetical protein OsI_35602 [Oryza sativa Indica Group]
BGIOSGA026304	282	300	373	1	2	3	120.31	3.61786e-27	up	PREDICTED: beta-glucosidase 26 isoform X1 [Oryza sativa Japonica Group]
BGIOSGA020546	596	628	1432	49	31	22	19.0917	4.29442e-27	up	hypothetical protein OsI_24440 [Oryza sativa Indica Group]
BGIOSGA011043	175	63	42	1919	2954	3917	0.0248656	4.55253e-27	down	PREDICTED: fructose-1,6-bisphosphatase, chloroplastic [Oryza sativa Japonica Group]
BGIOSGA029048	652	870	899	119	113	121	5.18376	9.06405e-27	up	PREDICTED: nucleotide pyrophosphatase/phosphodiesterase [Oryza sativa Japonica Group]
BGIOSGA027083	0	4	0	321	347	291	0.0031402	9.81595e-27	down	hypothetical protein OsI_28998 [Oryza sativa Indica Group]
BGIOSGA015346	329	270	278	0	2	5	95.9623	3.42572e-26	up	hypothetical protein OsI_15353 [Oryza sativa Indica Group]
BGIOSGA002964	262	209	306	1128	768	916	0.209176	3.6995e-26	down	PREDICTED: WD repeat-containing protein 53 isoform X2 [Oryza sativa Japonica Group]
BGIOSGA013921	1	0	0	2026	1436	1863	0.000154081	3.72314e-26	down	hypothetical protein OsI_14284 [Oryza sativa Indica Group]
BGIOSGA029365	17086	50589	102254	0	0	3	42825.9	5.7441e-26	up	hypothetical protein OsI_32190 [Oryza sativa Indica Group]
BGIOSGA016217	658	1117	1469	51	23	77	16.4649	6.51427e-26	up	PREDICTED: protein DETOXIFICATION 16 [Oryza sativa Japonica Group]
BGIOSGA016670	3	5	0	155	128	181	0.0132498	8.04384e-26	down	hypothetical protein OsI_16442 [Oryza sativa Indica Group]
BGIOSGA037775	0	0	0	807	756	1065	0.000160155	8.30714e-26	down	hypothetical protein OsI_39066 [Oryza sativa Indica Group]
BGIOSGA016353	966	1187	1992	133	133	169	7.0921	9.71441e-26	up	hypothetical protein OsI_15805 [Oryza sativa Indica Group]
BGIOSGA028284	1	0	2	438	339	451	0.00185406	9.96836e-26	down	hypothetical protein OsI_28427 [Oryza sativa Indica Group]
BGIOSGA015219	686	505	695	1890	1943	2383	0.229593	1.19226e-25	down	PREDICTED: violaxanthin de-epoxidase, chloroplastic [Oryza sativa Japonica Group]
BGIOSGA018738	2840	4140	1974	28796	28721	22436	0.0859901	2.14039e-25	down	hypothetical protein OsI_18609 [Oryza sativa Indica Group]
BGIOSGA007267	655	480	637	77	79	76	5.76337	2.47399e-25	up	hypothetical protein OsI_05542 [Oryza sativa Indica Group]
BGIOSGA019269	839	839	987	165	165	155	4.13808	2.81138e-25	up	hypothetical protein OsI_18669 [Oryza sativa Indica Group]
BGIOSGA015524	1	0	3	262	296	245	0.00370896	4.03519e-25	down	hypothetical protein OsI_14992 [Oryza sativa Indica Group]
BGIOSGA037589	444	336	315	3	1	1	168.312	4.81677e-25	up	hypothetical protein OsI_38720 [Oryza sativa Indica Group]
BGIOSGA015140	2940	3084	7214	293	333	358	9.83979	4.93646e-25	up	hypothetical protein OsI_15790 [Oryza sativa Indica Group]
BGIOSGA030039	1546	2046	9023	85	66	82	38.7458	6.04362e-25	up	hypothetical protein OsI_30783 [Oryza sativa Indica Group]
BGIOSGA037333	3812	877	1148	36	39	35	40.9026	6.62145e-25	up	hypothetical protein OsI_38200 [Oryza sativa Indica Group]
BGIOSGA002523	1	1	2	237	205	267	0.00427743	7.83762e-25	down	hypothetical protein OsI_00125 [Oryza sativa Indica Group]
BGIOSGA006043	2	1	1	236	240	240	0.0042115	8.58043e-25	down	hypothetical protein OsI_08071 [Oryza sativa Indica Group]
BGIOSGA023108	333	509	1437	12	11	23	36.3132	1.24113e-24	up	hypothetical protein OsI_23413 [Oryza sativa Indica Group]
BGIOSGA001192	1971	1896	2200	427	336	312	4.26394	1.36976e-24	up	hypothetical protein OsI_02893 [Oryza sativa Indica Group]
BGIOSGA002734	617	555	915	99	85	117	5.21149	2.60173e-24	up	hypothetical protein OsI_00308 [Oryza sativa Indica Group]
BGIOSGA026706	314	213	423	26	18	21	10.9517	2.75288e-24	up	Os08g0509400, partial [Oryza sativa Japonica Group]
BGIOSGA002257	2027	2081	1649	8152	8232	7224	0.185549	3.50866e-24	down	hypothetical protein OsI_00646 [Oryza sativa Indica Group]
BGIOSGA002290	710	622	642	2406	2204	1994	0.226392	4.28879e-24	down	hypothetical protein OsI_00593 [Oryza sativa Indica Group]
BGIOSGA028287	42	53	43	304	241	513	0.101176	4.42355e-24	down	hypothetical protein OsI_28430 [Oryza sativa Indica Group]
BGIOSGA028176	152	177	196	9	6	5	19.8715	1.11727e-23	up	NBS-LRR-like resistance protein [Oryza sativa]
BGIOSGA012784	375	294	784	16	20	30	16.2499	1.29716e-23	up	hypothetical protein OsI_11871 [Oryza sativa Indica Group]
BGIOSGA034975	15	4	5	135	202	246	0.0314163	1.35959e-23	down	hypothetical protein OsI_35429 [Oryza sativa Indica Group]
BGIOSGA016528	1	0	1	594	742	1000	0.000647728	1.44394e-23	down	PREDICTED: uncharacterized protein LOC4336027 [Oryza sativa Japonica Group]
BGIOSGA019320	2453	2493	2395	8564	7503	6844	0.242956	1.55054e-23	down	PREDICTED: ABC transporter C family member 8 isoform X2 [Oryza sativa Japonica Group]
BGIOSGA033720	78	49	40	378	340	459	0.109601	1.83229e-23	down	hypothetical protein OsI_36661 [Oryza sativa Indica Group]
BGIOSGA009444	38	48	37	243	177	235	0.144013	2.33119e-23	down	hypothetical protein OsI_14320 [Oryza sativa Indica Group]
BGIOSGA013818	299	232	357	32	31	31	7.09888	2.57809e-23	up	hypothetical protein OsI_14065 [Oryza sativa Indica Group]
BGIOSGA027936	197	212	196	5	8	1	32.5523	2.80471e-23	up	hypothetical protein OsI_27710 [Oryza sativa Indica Group]
BGIOSGA018620	173	160	191	4	5	2	35.9519	3.38566e-23	up	hypothetical protein OsI_18829 [Oryza sativa Indica Group]
BGIOSGA029946	360	278	477	0	4	0	207.375	4.24438e-23	up	hypothetical protein OsI_30969 [Oryza sativa Indica Group]
BGIOSGA036217	394	334	607	50	45	57	6.5703	4.40758e-23	up	hypothetical protein OsI_38281 [Oryza sativa Indica Group]
BGIOSGA034556	611	516	492	76	69	70	5.74659	4.73991e-23	up	hypothetical protein OsI_34994 [Oryza sativa Indica Group]
BGIOSGA025384	241	183	168	4	6	7	26.6987	5.32409e-23	up	hypothetical protein OsI_25350 [Oryza sativa Indica Group]
BGIOSGA005777	6184	7102	5427	814	768	1162	5.26732	5.45175e-23	up	hypothetical protein OsI_08611 [Oryza sativa Indica Group]
BGIOSGA017625	13915	6765	16909	1009	961	1431	8.29534	6.2671e-23	up	hypothetical protein OsI_20868 [Oryza sativa Indica Group]
BGIOSGA024782	919	1256	828	4678	5567	4842	0.151388	6.6694e-23	down	hypothetical protein OsI_24982 [Oryza sativa Indica Group]
BGIOSGA008839	421	330	554	3787	2647	1796	0.118017	7.16851e-23	down	hypothetical protein OsI_08530 [Oryza sativa Indica Group]
BGIOSGA022213	167	201	416	2	4	3	63.9983	8.44627e-23	up	PREDICTED: uncharacterized protein LOC4339960 [Oryza sativa Japonica Group]
BGIOSGA002993	434	242	915	6	15	4	45.1147	9.51913e-23	up	hypothetical protein OsI_00887 [Oryza sativa Indica Group]
BGIOSGA027490	6	3	0	151	110	122	0.0180354	1.083e-22	down	hypothetical protein OsI_28162 [Oryza sativa Indica Group]
BGIOSGA027390	73	44	63	279	357	361	0.135877	1.14853e-22	down	hypothetical protein OsI_28382 [Oryza sativa Indica Group]
BGIOSGA027430	170	181	88	1046	1254	2151	0.0773289	1.32277e-22	down	hypothetical protein OsI_28301 [Oryza sativa Indica Group]
BGIOSGA023867	939	931	743	0	0	0	3628.7	1.4752e-22	up	hypothetical protein OsI_26968 [Oryza sativa Indica Group]
BGIOSGA027540	328	348	300	2	2	0	186.299	1.90573e-22	up	hypothetical protein OsI_28060 [Oryza sativa Indica Group]
BGIOSGA029934	195	151	229	8	13	10	13.8899	1.95384e-22	up	hypothetical protein OsI_30999 [Oryza sativa Indica Group]
BGIOSGA029918	0	0	0	552	347	563	0.000289915	2.03491e-22	down	hypothetical protein OsI_31026 [Oryza sativa Indica Group]
BGIOSGA009587	2	3	3	115	94	122	0.0183547	2.26115e-22	down	hypothetical protein OsI_14024 [Oryza sativa Indica Group]
BGIOSGA019773	1129	1287	2344	147	161	215	6.76221	2.55207e-22	up	hypothetical protein OsI_19780 [Oryza sativa Indica Group]
BGIOSGA024529	740	657	967	0	0	0	3215.98	2.90736e-22	up	hypothetical protein OsI_25521 [Oryza sativa Indica Group]
BGIOSGA028405	0	0	0	555	429	413	0.000299197	2.98592e-22	down	putative bacterial blight-resistance protein Xa1 [Oryza sativa Indica Group]
BGIOSGA037364	883	1178	2352	65	9	24	34.0426	3.17256e-22	up	hypothetical protein OsI_38270 [Oryza sativa Indica Group]
BGIOSGA005423	1	1	3	139	126	224	0.00778588	4.99489e-22	down	hypothetical protein OsI_09313 [Oryza sativa Indica Group]
BGIOSGA009329	750	607	902	0	0	0	3077.57	5.34115e-22	up	hypothetical protein OsI_09520 [Oryza sativa Indica Group]
BGIOSGA022251	219	182	502	5	10	10	26.3658	5.74826e-22	up	PREDICTED: uncharacterized protein At4g22758 [Oryza sativa Japonica Group]
BGIOSGA016071	1	0	1	575	422	698	0.000901886	6.10563e-22	down	hypothetical protein OsI_15229 [Oryza sativa Indica Group]
BGIOSGA015285	0	0	0	480	384	394	0.000332568	8.18116e-22	down	hypothetical protein OsI_15472 [Oryza sativa Indica Group]
BGIOSGA013888	603	650	809	151	108	151	3.81645	9.40596e-22	up	PREDICTED: electron transfer flavoprotein subunit alpha, mitochondrial [Oryza sativa Japonica Group]
BGIOSGA026408	347	583	1227	42	27	28	16.3161	9.83936e-22	up	hypothetical protein OsI_27368 [Oryza sativa Indica Group]
BGIOSGA014346	194	251	199	1301	814	849	0.166491	1.24525e-21	down	hypothetical protein OsI_17410 [Oryza sativa Indica Group]
EPlOING00000025526	13	17	37	169	185	201	0.089314	1.49915e-21	down	.
BGIOSGA028421	400	357	337	1105	1012	1116	0.258158	2.05111e-21	down	hypothetical protein OsI_28710 [Oryza sativa Indica Group]
BGIOSGA029729	9197	8868	12384	987	1324	1879	5.47655	2.07463e-21	up	hypothetical protein OsI_31435 [Oryza sativa Indica Group]
BGIOSGA028445	691	526	831	0	0	0	2786.88	2.11752e-21	up	hypothetical protein OsI_28770 [Oryza sativa Indica Group]
BGIOSGA015338	649	585	720	0	0	0	2675.94	2.19516e-21	up	hypothetical protein OsI_15370 [Oryza sativa Indica Group]
BGIOSGA014305	3	0	1	173	148	173	0.00613915	2.21375e-21	down	hypothetical protein OsI_17518 [Oryza sativa Indica Group]
BGIOSGA005864	24	21	32	193	139	142	0.122397	2.23127e-21	down	hypothetical protein OsI_08419 [Oryza sativa Indica Group]
BGIOSGA036099	127	80	92	427	470	473	0.165523	2.40628e-21	down	PREDICTED: polyol transporter 5 [Oryza sativa Japonica Group]
BGIOSGA008808	1066	993	705	4803	4793	3891	0.156423	2.46186e-21	down	hypothetical protein OsI_08463 [Oryza sativa Indica Group]
BGIOSGA006044	3	1	7	116	79	127	0.0258328	2.71177e-21	down	hypothetical protein OsI_08070 [Oryza sativa Indica Group]
BGIOSGA020641	66	63	46	372	228	348	0.143125	3.08462e-21	down	hypothetical protein OsI_24251 [Oryza sativa Indica Group]
BGIOSGA014354	359	342	486	1	1	1	298.023	3.11814e-21	up	hypothetical protein OsI_17399 [Oryza sativa Indica Group]
BGIOSGA016152	861	672	1028	0	0	2	967.371	3.34977e-21	up	hypothetical protein OsI_15406 [Oryza sativa Indica Group]
BGIOSGA004915	128	198	121	701	827	839	0.144227	3.41459e-21	down	hypothetical protein OsI_04648 [Oryza sativa Indica Group]
BGIOSGA028205	809	592	612	0	0	0	2784.77	3.5692e-21	up	hypothetical protein OsI_28261 [Oryza sativa Indica Group]
BGIOSGA018546	6719	3765	5614	71	180	352	20.4513	3.89427e-21	up	.
BGIOSGA004808	906	288	729	32	28	37	15.0054	3.90822e-21	up	hypothetical protein OsI_04449 [Oryza sativa Indica Group]
BGIOSGA018892	466	157	680	2	4	12	54.0905	4.45067e-21	up	hypothetical protein OsI_18291 [Oryza sativa Indica Group]
BGIOSGA023691	786	998	1265	157	173	153	4.70679	4.46227e-21	up	hypothetical protein OsI_27396 [Oryza sativa Indica Group]
BGIOSGA030237	90	186	110	1121	605	1081	0.107239	5.24382e-21	down	hypothetical protein OsI_30377 [Oryza sativa Indica Group]
BGIOSGA034619	4226	3929	3174	704	529	571	4.82723	5.50277e-21	up	hypothetical protein OsI_34872 [Oryza sativa Indica Group]
BGIOSGA023723	572	482	641	0	0	0	2317.36	1.3343e-20	up	hypothetical protein OsI_27317 [Oryza sativa Indica Group]
BGIOSGA014411	433	343	488	77	55	59	5.00084	1.35784e-20	up	hypothetical protein OsI_17270 [Oryza sativa Indica Group]
BGIOSGA023820	234	153	474	8	10	4	28.3536	1.42038e-20	up	hypothetical protein OsI_27083 [Oryza sativa Indica Group]
BGIOSGA029452	1181	1064	1962	161	174	245	5.41968	1.78604e-20	up	hypothetical protein OsI_32015 [Oryza sativa Indica Group]
BGIOSGA017085	673	638	580	108	67	112	5.09136	1.95227e-20	up	hypothetical protein OsI_17334 [Oryza sativa Indica Group]
BGIOSGA018827	1817	1575	1640	4550	4564	4413	0.281834	2.18021e-20	down	hypothetical protein OsI_18421 [Oryza sativa Indica Group]
BGIOSGA004557	492	562	1002	76	35	34	10.5781	2.22982e-20	up	.
BGIOSGA016444	77	81	123	316	281	396	0.213372	2.31677e-20	down	hypothetical protein OsI_15950 [Oryza sativa Indica Group]
BGIOSGA018902	0	0	0	334	347	284	0.000429719	2.68972e-20	down	hypothetical protein OsI_18267 [Oryza sativa Indica Group]
BGIOSGA002514	15	14	6	349	140	157	0.0422678	2.77069e-20	down	hypothetical protein OsI_00136 [Oryza sativa Indica Group]
BGIOSGA019256	3160	2542	2361	10790	10459	8697	0.20443	4.41004e-20	down	hypothetical protein OsI_18630 [Oryza sativa Indica Group]
BGIOSGA016288	373	228	187	1546	1678	1506	0.127495	4.79439e-20	down	hypothetical protein OsI_15682 [Oryza sativa Indica Group]
BGIOSGA013932	597	355	816	0	0	0	2382.7	4.95273e-20	up	hypothetical protein OsI_14308 [Oryza sativa Indica Group]
BGIOSGA036746	481	401	765	0	0	0	2219.93	5.32464e-20	up	hypothetical protein OsI_37254 [Oryza sativa Indica Group]
BGIOSGA024203	163	282	704	1	0	5	141.85	5.69017e-20	up	hypothetical protein OsI_26253 [Oryza sativa Indica Group]
BGIOSGA023534	822	531	2071	25	19	65	23.4375	6.5861e-20	up	hypothetical protein OsI_24317 [Oryza sativa Indica Group]
BGIOSGA027220	0	0	0	251	275	330	0.000488836	8.70306e-20	down	unknown protein [Oryza sativa Japonica Group]
BGIOSGA026645	2	2	3	125	101	85	0.0169139	8.74886e-20	down	hypothetical protein OsI_29933 [Oryza sativa Indica Group]
BGIOSGA009790	827	738	925	191	123	133	4.22534	8.80963e-20	up	PREDICTED: COBRA-like protein 3 [Oryza sativa Japonica Group]
BGIOSGA022996	646	718	770	142	69	104	5.19268	9.21802e-20	up	hypothetical protein OsI_23137 [Oryza sativa Indica Group]
BGIOSGA011878	324	271	218	9	3	20	20.0295	9.96225e-20	up	hypothetical protein OsI_10060 [Oryza sativa Indica Group]
BGIOSGA015286	0	0	0	279	220	371	0.000486656	1.00315e-19	down	hypothetical protein OsI_15471 [Oryza sativa Indica Group]
BGIOSGA000870	621	555	1218	69	79	101	7.11237	1.30332e-19	up	PREDICTED: pathogen-related protein [Oryza sativa Japonica Group]
BGIOSGA014879	364	445	768	0	0	0	2118.7	1.39919e-19	up	hypothetical protein OsI_16319 [Oryza sativa Indica Group]
BGIOSGA005328	426	371	818	0	0	0	2161.49	1.47467e-19	up	hypothetical protein OsI_09523 [Oryza sativa Indica Group]
BGIOSGA022232	1	5	0	133	187	107	0.0105345	1.56928e-19	down	PREDICTED: GDSL esterase/lipase At5g45910 isoform X2 [Oryza sativa Japonica Group]
BGIOSGA018130	1902	1090	1824	254	189	169	5.92437	1.59951e-19	up	hypothetical protein OsI_19799 [Oryza sativa Indica Group]
BGIOSGA028177	339	393	532	48	44	77	5.66394	1.80293e-19	up	hypothetical protein OsI_28211 [Oryza sativa Indica Group]
BGIOSGA010010	1144	928	1665	191	199	159	5.03575	1.80731e-19	up	hypothetical protein OsI_13105 [Oryza sativa Indica Group]
BGIOSGA037821	124	106	120	858	392	1267	0.108841	1.85995e-19	down	hypothetical protein OsI_39167 [Oryza sativa Indica Group]
BGIOSGA014005	0	0	0	269	224	291	0.000536287	1.86752e-19	down	hypothetical protein OsI_14461 [Oryza sativa Indica Group]
BGIOSGA000410	1402	766	944	4199	4442	4770	0.176667	2.13282e-19	down	hypothetical protein OsI_04619 [Oryza sativa Indica Group]
BGIOSGA035811	424	362	605	0	0	0	1884.34	2.21087e-19	up	transposon protein, putative, Mutator sub-class, expressed [Oryza sativa Japonica Group]
BGIOSGA036886	22775	27699	26361	4879	4333	6833	3.6731	2.34711e-19	up	PREDICTED: probable non-specific lipid-transfer protein 3 [Oryza sativa Japonica Group]
BGIOSGA024778	66	50	61	226	252	235	0.186974	2.61083e-19	down	hypothetical protein OsI_24991 [Oryza sativa Indica Group]
BGIOSGA020359	869	336	501	37	36	42	11.3486	3.09059e-19	up	PREDICTED: fasciclin-like arabinogalactan protein 13 [Oryza sativa Japonica Group]
BGIOSGA023732	1166	1094	1288	218	262	269	3.56873	3.11435e-19	up	hypothetical protein OsJ_25542 [Oryza sativa Japonica Group]
BGIOSGA033512	104	107	79	395	313	488	0.187646	3.56466e-19	down	hypothetical protein OsI_37097 [Oryza sativa Indica Group]
BGIOSGA029374	1012	553	758	110	67	96	6.53407	3.68937e-19	up	hypothetical protein OsI_32163 [Oryza sativa Indica Group]
BGIOSGA005688	948	643	722	66	103	97	6.57208	4.07567e-19	up	hypothetical protein OsI_08793 [Oryza sativa Indica Group]
BGIOSGA037564	117	133	158	6	7	9	14.0221	4.17407e-19	up	hypothetical protein OsI_38672 [Oryza sativa Indica Group]
BGIOSGA003503	0	0	0	495	123	544	0.00037388	4.24601e-19	down	hypothetical protein OsI_01880 [Oryza sativa Indica Group]
BGIOSGA018258	2043	1329	2712	106	77	248	10.8329	5.13704e-19	up	hypothetical protein OsI_19536 [Oryza sativa Indica Group]
BGIOSGA027945	208	216	176	18	12	22	8.91055	6.23574e-19	up	hypothetical protein OsI_27719 [Oryza sativa Indica Group]
BGIOSGA011619	97	60	70	298	360	378	0.166134	7.46363e-19	down	hypothetical protein OsI_09639 [Oryza sativa Indica Group]
BGIOSGA018455	423	313	504	0	0	0	1687.23	7.64583e-19	up	hypothetical protein OsI_19132 [Oryza sativa Indica Group]
BGIOSGA015087	126	156	162	6	9	12	12.4724	7.76056e-19	up	hypothetical protein OsI_15941 [Oryza sativa Indica Group]
BGIOSGA024783	51	73	98	267	318	403	0.168426	8.51727e-19	down	hypothetical protein [Oryza sativa Japonica Group]
BGIOSGA007155	918	1206	1989	72	145	128	8.71825	8.9484e-19	up	hypothetical protein OsI_05799 [Oryza sativa Indica Group]
BGIOSGA005202	477	458	524	1091	914	1045	0.36286	9.19274e-19	down	hypothetical protein OsI_05264 [Oryza sativa Indica Group]
BGIOSGA034642	0	0	0	198	203	307	0.00059509	1.19434e-18	down	hypothetical protein LOC_Os11g01690 [Oryza sativa Japonica Group]
BGIOSGA028395	76	44	50	289	217	340	0.154887	1.28465e-18	down	hypothetical protein OsI_28654 [Oryza sativa Indica Group]
BGIOSGA026872	211	100	208	2	3	3	48.7742	1.40462e-18	up	hypothetical protein OsI_29480 [Oryza sativa Indica Group]
BGIOSGA005422	488	373	472	1611	1142	1188	0.256702	1.42176e-18	down	hypothetical protein OsI_09314 [Oryza sativa Indica Group]
BGIOSGA015397	506	361	352	0	0	0	1690.26	1.43797e-18	up	hypothetical protein OsI_15275 [Oryza sativa Indica Group]
BGIOSGA002263	328	294	270	946	874	845	0.254711	1.59029e-18	down	hypothetical protein OsI_00633 [Oryza sativa Indica Group]
BGIOSGA005199	422	275	494	0	0	0	1617.99	1.80774e-18	up	hypothetical protein OsI_05260 [Oryza sativa Indica Group]
BGIOSGA016428	607	647	803	1	0	0	1441.59	2.09112e-18	up	hypothetical protein OsI_15923 [Oryza sativa Indica Group]
BGIOSGA030524	0	0	0	250	186	207	0.000652436	2.23865e-18	down	hypothetical protein OsI_30910 [Oryza sativa Indica Group]
BGIOSGA002509	578	538	696	1293	1076	1266	0.376952	2.29523e-18	down	hypothetical protein OsI_00145 [Oryza sativa Indica Group]
BGIOSGA002483	231	547	310	1	0	2	280.994	2.41362e-18	up	PREDICTED: Bowman-Birk type bran trypsin inhibitor [Oryza sativa Japonica Group]
BGIOSGA013382	98	76	84	278	279	300	0.228413	2.42802e-18	down	hypothetical protein OsI_13141 [Oryza sativa Indica Group]
BGIOSGA011919	707	617	782	162	158	161	3.30242	2.59014e-18	up	hypothetical protein OsI_10127 [Oryza sativa Indica Group]
BGIOSGA009221	226	293	230	1	9	16	22.1053	2.65719e-18	up	unknown protein [Oryza sativa Japonica Group]
BGIOSGA011305	97	106	102	389	409	836	0.144118	2.66113e-18	down	hypothetical protein OsI_10329 [Oryza sativa Indica Group]
BGIOSGA030533	0	0	0	212	230	199	0.000647525	2.68229e-18	down	hypothetical protein OsI_30928 [Oryza sativa Indica Group]
EPlOING00000005275	141	182	252	2	5	14	20.7275	3.03397e-18	up	.
BGIOSGA006777	36	26	40	157	230	395	0.0991165	3.33701e-18	down	hypothetical protein OsI_06588 [Oryza sativa Indica Group]
BGIOSGA002720	30	39	46	172	161	300	0.138694	3.47245e-18	down	hypothetical protein OsI_00278 [Oryza sativa Indica Group]
BGIOSGA022371	1114	734	1328	204	129	179	4.69057	3.80578e-18	up	PREDICTED: uncharacterized protein LOC4340222 [Oryza sativa Japonica Group]
BGIOSGA015218	1	0	0	368	315	471	0.000711982	3.8857e-18	down	hypothetical protein OsI_15600 [Oryza sativa Indica Group]
BGIOSGA022040	0	0	0	282	131	281	0.000615747	4.19208e-18	down	PREDICTED: uncharacterized protein LOC4339945 [Oryza sativa Japonica Group]
BGIOSGA035004	0	0	0	132	288	359	0.000534511	4.37544e-18	down	hypothetical protein OsI_35528 [Oryza sativa Indica Group]
BGIOSGA002354	666	556	1507	73	34	87	10.5467	4.3839e-18	up	hypothetical protein OsI_00488 [Oryza sativa Indica Group]
BGIOSGA034891	0	0	0	176	284	200	0.000621794	5.63259e-18	down	hypothetical protein OsI_35286 [Oryza sativa Indica Group]
BGIOSGA014263	0	1	0	334	365	394	0.000743578	6.23057e-18	down	hypothetical protein OsI_17596 [Oryza sativa Indica Group]
BGIOSGA036938	315	431	312	0	0	0	1467.31	6.29242e-18	up	hypothetical protein OsI_37356 [Oryza sativa Indica Group]
BGIOSGA025147	346	301	340	0	0	0	1356.7	6.44082e-18	up	hypothetical protein OsI_24888 [Oryza sativa Indica Group]
BGIOSGA027098	0	0	0	228	159	194	0.000724007	7.39462e-18	down	hypothetical protein OsI_28975 [Oryza sativa Indica Group]
BGIOSGA009559	1295	1203	2260	258	211	322	4.5079	7.88902e-18	up	putative PHD-type zinc finger protein [Oryza sativa Japonica Group]
BGIOSGA031338	483	856	2957	27	18	62	29.5829	8.11178e-18	up	PREDICTED: uncharacterized protein LOC4349493 [Oryza sativa Japonica Group]
BGIOSGA015283	886	546	558	0	0	1	1418.46	1.10321e-17	up	hypothetical protein OsJ_14395 [Oryza sativa Japonica Group]
BGIOSGA026207	331	213	541	35	31	27	8.60411	1.30235e-17	up	PREDICTED: pectin acetylesterase 12 [Oryza sativa Japonica Group]
BGIOSGA008546	29	32	41	133	137	196	0.165778	1.3708e-17	down	hypothetical protein OsI_07921 [Oryza sativa Indica Group]
BGIOSGA017490	3512	5315	25093	40	60	69	141.727	1.52942e-17	up	PREDICTED: glucose-1-phosphate adenylyltransferase large subunit, chloroplastic/amyloplastic [Oryza sativa Japonica Group]
BGIOSGA002619	2	2	3	66	91	100	0.0204599	1.58595e-17	down	hypothetical protein OsI_00080 [Oryza sativa Indica Group]
BGIOSGA009460	67	59	46	285	227	229	0.177667	1.58696e-17	down	PREDICTED: poly(ADP-ribose) glycohydrolase 1 [Oryza sativa Japonica Group]
BGIOSGA019373	363	763	1133	42	62	62	10.0037	1.74091e-17	up	hypothetical protein OsI_18903 [Oryza sativa Indica Group]
BGIOSGA034867	0	0	0	176	157	192	0.00079914	1.81751e-17	down	hypothetical protein OsI_35231 [Oryza sativa Indica Group]
BGIOSGA002521	238	197	265	0	1	2	176.694	1.90806e-17	up	hypothetical protein OsI_00127 [Oryza sativa Indica Group]
BGIOSGA013562	2550	782	1884	67	110	141	12.3757	2.01723e-17	up	PREDICTED: beta-glucosidase BoGH3B [Oryza sativa Japonica Group]
BGIOSGA002820	4797	10244	28973	9	4	41	617.649	2.05056e-17	up	hypothetical protein OsI_00467 [Oryza sativa Indica Group]
BGIOSGA001181	210	199	623	12	18	15	16.5305	2.19531e-17	up	hypothetical protein OsI_02913 [Oryza sativa Indica Group]
BGIOSGA005689	373	195	492	0	0	0	1427.82	2.21432e-17	up	hypothetical protein OsI_08792 [Oryza sativa Indica Group]
BGIOSGA036194	0	0	0	327	122	193	0.000663076	2.21609e-17	down	hypothetical protein OsI_38330 [Oryza sativa Indica Group]
BGIOSGA028201	422	400	479	863	789	980	0.374817	2.34297e-17	down	hypothetical protein OsI_28253 [Oryza sativa Indica Group]
BGIOSGA035949	182	181	175	24	17	22	6.53055	2.7305e-17	up	hypothetical protein OsI_38869 [Oryza sativa Indica Group]
BGIOSGA005632	495	276	540	25	49	35	8.87557	2.88378e-17	up	hypothetical protein OsI_08915 [Oryza sativa Indica Group]
BGIOSGA016875	469	1052	1554	37	39	96	13.4846	2.93098e-17	up	OSIGBa0106P14.1 [Oryza sativa Indica Group]
BGIOSGA011879	935	530	834	73	86	130	6.04952	3.38122e-17	up	hypothetical protein OsI_10062 [Oryza sativa Indica Group]
BGIOSGA002499	896	596	644	2337	1937	2333	0.247734	3.79528e-17	down	hypothetical protein OsJ_00171 [Oryza sativa Japonica Group]
BGIOSGA036550	608	405	625	0	0	1	1148.66	4.28253e-17	up	hypothetical protein OsI_37631 [Oryza sativa Indica Group]
BGIOSGA002651	0	0	1	491	340	230	0.000763507	4.63577e-17	down	hypothetical protein OsI_00144 [Oryza sativa Indica Group]
BGIOSGA015095	269	204	589	0	0	0	1409.67	4.76296e-17	up	hypothetical protein OsI_15922 [Oryza sativa Indica Group]
BGIOSGA020562	1	1	1	182	105	132	0.00545704	4.96352e-17	down	hypothetical protein OsI_24406 [Oryza sativa Indica Group]
BGIOSGA034333	0	0	0	184	128	177	0.000862507	5.02652e-17	down	hypothetical protein OsI_35479 [Oryza sativa Indica Group]
BGIOSGA015681	0	0	0	149	139	207	0.000851362	5.17277e-17	down	hypothetical protein OsI_14664 [Oryza sativa Indica Group]
BGIOSGA034779	13	11	18	186	149	83	0.0746123	5.51472e-17	down	hypothetical protein OsI_35075 [Oryza sativa Indica Group]
BGIOSGA008359	406	309	540	71	43	75	5.02991	6.69501e-17	up	PREDICTED: alpha carbonic anhydrase 1, chloroplastic [Oryza sativa Japonica Group]
BGIOSGA024953	118	139	193	1	0	4	68.1274	8.45898e-17	up	PREDICTED: uncharacterized protein LOC4342224 [Oryza sativa Japonica Group]
BGIOSGA013869	2	3	3	90	52	89	0.0265336	8.78697e-17	down	PREDICTED: GATA transcription factor 16 [Oryza sativa Japonica Group]
BGIOSGA030212	0	0	0	162	133	160	0.000922537	9.13049e-17	down	hypothetical protein OsI_30421 [Oryza sativa Indica Group]
BGIOSGA022657	1530	979	1862	141	207	242	5.52613	9.2755e-17	up	hypothetical protein OsI_22452 [Oryza sativa Indica Group]
BGIOSGA002388	424	702	478	2037	1762	1876	0.216297	9.8257e-17	down	PREDICTED: uncharacterized protein LOC4324515 isoform X1 [Oryza sativa Japonica Group]
BGIOSGA002227	509	387	562	0	0	1	1022.04	1.08568e-16	up	hypothetical protein OsI_00713 [Oryza sativa Indica Group]
BGIOSGA028543	150	231	126	782	607	859	0.175222	1.1847e-16	down	hypothetical protein OsI_28981 [Oryza sativa Indica Group]
BGIOSGA018579	1570	2832	4924	216	202	394	8.58641	1.25282e-16	up	RecName: Full=BURP domain-containing protein 6; Short=OsBURP06; Flags: Precursor
BGIOSGA002517	218	149	279	20	22	27	7.01682	1.3296e-16	up	hypothetical protein OsI_00132 [Oryza sativa Indica Group]
BGIOSGA014017	0	0	1	282	229	302	0.0010079	1.35479e-16	down	hypothetical protein OsI_14480 [Oryza sativa Indica Group]
BGIOSGA030597	227	230	200	795	550	613	0.257114	1.35542e-16	down	hypothetical protein OsI_31058 [Oryza sativa Indica Group]
BGIOSGA025034	115	100	245	5	6	4	22.4909	1.4151e-16	up	PREDICTED: flavin-containing monooxygenase FMO GS-OX-like 9 [Oryza sativa Japonica Group]
BGIOSGA036180	0	0	0	119	146	204	0.000895078	1.53025e-16	down	hypothetical protein OsI_38357 [Oryza sativa Indica Group]
BGIOSGA015907	0	0	2	346	205	181	0.00205476	1.77307e-16	down	hypothetical protein OsI_14876 [Oryza sativa Indica Group]
BGIOSGA008626	0	0	0	126	138	166	0.000973291	2.14074e-16	down	hypothetical protein OsI_08075 [Oryza sativa Indica Group]
BGIOSGA020688	375	312	764	44	53	40	7.71944	2.16482e-16	up	hypothetical protein OsI_24144 [Oryza sativa Indica Group]
BGIOSGA011604	9	16	20	87	101	142	0.102812	2.48914e-16	down	hypothetical protein OsI_09663 [Oryza sativa Indica Group]
BGIOSGA017876	23	23	38	159	103	224	0.131904	2.49729e-16	down	PREDICTED: probable WRKY transcription factor 33 [Oryza sativa Japonica Group]
BGIOSGA036920	634	769	807	52	15	86	11.3453	2.52683e-16	up	hypothetical protein OsI_37306 [Oryza sativa Indica Group]
BGIOSGA015282	402	340	164	0	0	0	1278.79	2.54827e-16	up	hypothetical protein OsI_15477 [Oryza sativa Indica Group]
BGIOSGA004093	495	536	558	1065	977	1117	0.381698	2.57152e-16	down	hypothetical protein OsI_03031 [Oryza sativa Indica Group]
BGIOSGA030144	0	0	0	140	185	125	0.000914187	2.75532e-16	down	PREDICTED: uncharacterized protein LOC4346534 [Oryza sativa Japonica Group]
BGIOSGA004823	213	311	674	21	13	36	12.7906	3.16515e-16	up	hypothetical protein OsI_04480 [Oryza sativa Indica Group]
BGIOSGA033103	93	137	128	4	7	4	17.9837	3.23911e-16	up	hypothetical protein OsI_33963 [Oryza sativa Indica Group]
BGIOSGA016620	114	64	76	357	664	499	0.125009	3.3077e-16	down	PREDICTED: uncharacterized protein LOC4336185 [Oryza sativa Japonica Group]
BGIOSGA015897	0	0	0	116	144	160	0.000993101	3.35625e-16	down	hypothetical protein OsI_14852 [Oryza sativa Indica Group]
BGIOSGA031275	256	366	454	2	0	0	405.221	3.84609e-16	up	hypothetical protein OsI_32405 [Oryza sativa Indica Group]
BGIOSGA004338	133	171	253	12	18	19	8.4637	3.84961e-16	up	hypothetical protein OsI_03520 [Oryza sativa Indica Group]
BGIOSGA008549	821	648	922	212	150	199	3.23409	3.87498e-16	up	hypothetical protein OsI_07925 [Oryza sativa Indica Group]
BGIOSGA035039	283	230	202	0	0	0	992.412	4.10952e-16	up	hypothetical protein OsI_35608 [Oryza sativa Indica Group]
BGIOSGA009542	366	322	590	64	62	80	4.63526	4.71341e-16	up	hypothetical protein OsI_14122 [Oryza sativa Indica Group]
BGIOSGA015234	116	167	191	0	1	3	89.6378	4.72428e-16	up	hypothetical protein OsI_15570 [Oryza sativa Indica Group]
BGIOSGA024806	0	0	0	107	127	188	0.000996655	5.17069e-16	down	hypothetical protein OsI_24930 [Oryza sativa Indica Group]
BGIOSGA002582	2142	1992	1960	4407	4778	4875	0.328778	5.39203e-16	down	PREDICTED: chaperone protein dnaJ 20, chloroplastic [Oryza sativa Japonica Group]
BGIOSGA027198	750	298	576	57	48	59	7.51906	5.48911e-16	up	PREDICTED: fasciclin-like arabinogalactan protein 1 [Oryza sativa Japonica Group]
BGIOSGA014415	204	170	347	0	0	0	969.444	6.1913e-16	up	hypothetical protein OsI_17262 [Oryza sativa Indica Group]
BGIOSGA015555	156	186	176	26	14	19	6.7162	6.32491e-16	up	hypothetical protein OsI_14938 [Oryza sativa Indica Group]
BGIOSGA037503	162	230	303	0	0	0	942.207	6.50507e-16	up	hypothetical protein OsI_38565 [Oryza sativa Indica Group]
BGIOSGA034877	253	222	188	934	709	643	0.221678	7.73193e-16	down	hypothetical protein OsI_35253 [Oryza sativa Indica Group]
BGIOSGA005482	2385	1181	2031	6417	5550	7737	0.216141	8.58992e-16	down	hypothetical protein OsI_09184 [Oryza sativa Indica Group]
BGIOSGA018704	616	445	591	122	88	84	4.25522	8.61599e-16	up	hypothetical protein OsI_18665 [Oryza sativa Indica Group]
BGIOSGA014559	154	239	281	0	0	0	916.68	9.27068e-16	up	hypothetical protein OsI_16962 [Oryza sativa Indica Group]
BGIOSGA018714	2952	1331	1609	243	115	104	9.83552	1.00164e-15	up	PREDICTED: probable cellulose synthase A catalytic subunit 1 [UDP-forming] [Oryza sativa Japonica Group]
BGIOSGA014518	0	0	0	106	113	162	0.0011038	1.07189e-15	down	hypothetical protein OsI_17055 [Oryza sativa Indica Group]
BGIOSGA002515	204	173	232	0	0	0	832.294	1.25855e-15	up	hypothetical protein OsI_00135 [Oryza sativa Indica Group]
BGIOSGA036218	189	171	254	0	0	0	834.924	1.32429e-15	up	hypothetical protein OsI_38279 [Oryza sativa Indica Group]
BGIOSGA034858	18	14	16	124	75	96	0.1243	1.46881e-15	down	hypothetical protein OsI_35216 [Oryza sativa Indica Group]
BGIOSGA027853	99	85	81	289	219	285	0.256157	1.48244e-15	down	hypothetical protein OsI_27540 [Oryza sativa Indica Group]
BGIOSGA037694	215	139	343	0	0	0	935.054	1.55126e-15	up	hypothetical protein OsI_38924 [Oryza sativa Indica Group]
BGIOSGA036917	2690	894	2440	234	115	134	9.44104	1.70958e-15	up	hypothetical protein OsI_37304 [Oryza sativa Indica Group]
BGIOSGA000820	634	565	805	185	144	158	3.10058	1.80744e-15	up	hypothetical protein OsI_03755 [Oryza sativa Indica Group]
BGIOSGA006331	197	140	356	0	0	0	926.48	1.98211e-15	up	hypothetical protein OsI_07501 [Oryza sativa Indica Group]
BGIOSGA014662	451	514	971	88	70	114	5.31917	2.32427e-15	up	PREDICTED: salutaridine reductase [Oryza sativa Japonica Group]
BGIOSGA009142	178	142	453	0	0	0	1020.78	2.40114e-15	up	hypothetical protein OsI_09160 [Oryza sativa Indica Group]
BGIOSGA002496	5	2	3	85	67	55	0.0364653	2.45665e-15	down	hypothetical protein OsI_00176 [Oryza sativa Indica Group]
BGIOSGA016608	196	223	173	0	0	0	820.841	2.48977e-15	up	hypothetical protein OsI_16318 [Oryza sativa Indica Group]
BGIOSGA027090	272	202	392	22	39	29	7.0832	2.63593e-15	up	hypothetical protein OsI_28991 [Oryza sativa Indica Group]
BGIOSGA025894	216	592	520	0	1	0	931.842	2.74768e-15	up	hypothetical protein OsI_26372 [Oryza sativa Indica Group]
BGIOSGA015756	73	151	209	2	5	2	35.3889	2.81129e-15	up	B0616E02-H0507E05.1 [Oryza sativa Indica Group]
BGIOSGA011996	136	118	425	3	0	1	124.239	2.86571e-15	up	hypothetical protein OsI_10286 [Oryza sativa Indica Group]
EPlOING00000036257	0	0	0	104	101	130	0.00125289	2.94804e-15	down	.
BGIOSGA022147	0	0	0	106	98	130	0.00125813	3.0114e-15	down	hypothetical protein OsI_21308 [Oryza sativa Indica Group]
BGIOSGA014854	420	357	552	65	72	104	4.15736	3.03398e-15	up	hypothetical protein OsI_16358 [Oryza sativa Indica Group]
BGIOSGA037652	599	598	789	194	138	168	3.00418	3.07155e-15	up	hypothetical protein OsI_38834 [Oryza sativa Indica Group]
BGIOSGA030498	0	0	0	101	128	113	0.0012121	3.18107e-15	down	hypothetical protein OsI_30849 [Oryza sativa Indica Group]
BGIOSGA006325	178	189	188	0	0	0	763.759	3.22108e-15	up	PREDICTED: autophagy-related protein 8D isoform X1 [Oryza sativa Japonica Group]
BGIOSGA000068	109	83	131	6	2	7	16.3704	3.24982e-15	up	PREDICTED: mitochondrial import inner membrane translocase subunit tim16 [Oryza sativa Japonica Group]
BGIOSGA030354	736	246	204	19	15	16	18.5052	3.31326e-15	up	PREDICTED: fasciclin-like arabinogalactan protein 2 [Oryza sativa Japonica Group]
EPlOING00000037339	0	0	0	99	91	162	0.0012029	3.61305e-15	down	.
BGIOSGA009194	1	6	7	68	57	110	0.0453455	3.75847e-15	down	hypothetical protein OsI_09256 [Oryza sativa Indica Group]
BGIOSGA037546	169	166	205	0	0	0	738.33	4.10469e-15	up	hypothetical protein OsI_38646 [Oryza sativa Indica Group]
BGIOSGA014554	497	434	554	932	896	1133	0.379934	4.20096e-15	down	PREDICTED: calcium-dependent protein kinase 2 [Oryza sativa Japonica Group]
BGIOSGA036192	77	69	68	252	195	210	0.248165	4.29237e-15	down	hypothetical protein OsI_38334 [Oryza sativa Indica Group]
BGIOSGA005198	249	217	143	0	0	0	851.896	4.37362e-15	up	PREDICTED: uncharacterized protein LOC4325412 [Oryza sativa Japonica Group]
BGIOSGA005059	6	7	1	87	64	71	0.0486548	4.5686e-15	down	hypothetical protein OsI_04949 [Oryza sativa Indica Group]
BGIOSGA010815	499	688	2239	62	19	68	17.0822	4.70505e-15	up	Putative r40c1 protein - rice [Oryza sativa Japonica Group]
BGIOSGA032502	18	32	18	279	139	131	0.095408	4.7674e-15	down	hypothetical protein OsI_32691 [Oryza sativa Indica Group]
BGIOSGA025249	1075	1138	1125	4237	3523	2539	0.244303	5.04992e-15	down	PREDICTED: low molecular mass early light-inducible protein HV60, chloroplastic [Oryza sativa Japonica Group]
BGIOSGA016567	99	105	237	3	5	9	19.201	5.163e-15	up	hypothetical protein OsI_16214 [Oryza sativa Indica Group]
BGIOSGA034288	66	61	61	202	164	194	0.25586	5.27603e-15	down	hypothetical protein OsI_35533 [Oryza sativa Indica Group]
BGIOSGA015908	1	0	0	179	152	303	0.00130576	5.45146e-15	down	hypothetical protein OsI_14877 [Oryza sativa Indica Group]
BGIOSGA035010	0	0	0	113	90	110	0.00134195	5.65228e-15	down	hypothetical protein OsI_35544 [Oryza sativa Indica Group]
BGIOSGA028215	91	83	153	6	3	3	20.3627	5.72169e-15	up	hypothetical protein OsI_28283 [Oryza sativa Indica Group]
BGIOSGA026643	402	247	541	61	43	37	6.28197	5.91125e-15	up	hypothetical protein OsI_29936 [Oryza sativa Indica Group]
BGIOSGA017188	6	5	9	78	50	75	0.0748335	6.04605e-15	down	OSJNBa0089N06.6 [Oryza sativa Japonica Group]
BGIOSGA000545	69	74	61	207	200	227	0.245434	6.07922e-15	down	hypothetical protein OsI_04320 [Oryza sativa Indica Group]
BGIOSGA037502	131	190	236	0	0	0	756.698	6.08413e-15	up	hypothetical protein OsI_38564 [Oryza sativa Indica Group]
BGIOSGA009501	124	121	149	0	4	0	73.7108	6.45551e-15	up	PREDICTED: uncharacterized protein LOC107277200 [Oryza sativa Japonica Group]
BGIOSGA017784	76	68	45	236	246	309	0.184145	6.54222e-15	down	PREDICTED: serine/threonine-protein kinase CDL1 [Oryza sativa Japonica Group]
BGIOSGA026296	228	223	481	0	0	2	346.341	7.19215e-15	up	hypothetical protein OsI_27154 [Oryza sativa Indica Group]
BGIOSGA027457	0	0	0	95	88	131	0.00134205	7.26927e-15	down	hypothetical protein OsI_28242 [Oryza sativa Indica Group]
BGIOSGA001480	808	775	1633	198	131	159	4.89662	7.28634e-15	up	PREDICTED: calcium permeable stress-gated cation channel 1 [Oryza sativa Japonica Group]
BGIOSGA018652	536	703	772	163	93	149	3.79291	7.4032e-15	up	hypothetical protein OsI_18775 [Oryza sativa Indica Group]
BGIOSGA029240	0	0	1	169	172	214	0.00147105	7.95734e-15	down	PREDICTED: germin-like protein 9-3 [Oryza sativa Japonica Group]
BGIOSGA005049	2	12	2	144	93	84	0.0385139	8.75348e-15	down	hypothetical protein OsI_04926 [Oryza sativa Indica Group]
BGIOSGA027284	0	0	0	84	100	130	0.00133459	8.76679e-15	down	hypothetical protein OsI_28595 [Oryza sativa Indica Group]
BGIOSGA034996	31	42	40	169	125	135	0.199952	8.97406e-15	down	hypothetical protein OsI_35478 [Oryza sativa Indica Group]
BGIOSGA016446	13	3	8	88	69	84	0.0757042	9.48721e-15	down	hypothetical protein OsI_15959 [Oryza sativa Indica Group]
BGIOSGA012177	1481	719	579	5249	6565	5230	0.124739	1.02426e-14	down	PREDICTED: branched-chain-amino-acid aminotransferase 2, chloroplastic [Oryza sativa Japonica Group]
BGIOSGA030622	208	157	1037	6	4	17	37.8336	1.11035e-14	up	hypothetical protein OsI_31100 [Oryza sativa Indica Group]
BGIOSGA016144	1653	1592	1191	4526	3471	4395	0.276632	1.33052e-14	down	hypothetical protein OsI_15388 [Oryza sativa Indica Group]
BGIOSGA015158	2518	2437	2098	6235	4747	5583	0.326938	1.41896e-14	down	hypothetical protein OsI_15760 [Oryza sativa Indica Group]
BGIOSGA005188	188	137	204	419	369	471	0.318024	1.52862e-14	down	PREDICTED: uncharacterized protein LOC4325753 [Oryza sativa Japonica Group]
BGIOSGA001724	81	100	156	6	7	6	13.2019	1.55487e-14	up	PREDICTED: tRNA (adenine(58)-N(1))-methyltransferase catalytic subunit TRMT61A [Oryza sativa Japonica Group]
BGIOSGA034471	116	202	199	0	0	0	706.922	1.64979e-14	up	hypothetical protein OsI_35172 [Oryza sativa Indica Group]
BGIOSGA036539	161	197	159	472	378	483	0.297408	1.67553e-14	down	hypothetical protein OsI_37660 [Oryza sativa Indica Group]
BGIOSGA012014	48	66	20	449	272	317	0.10139	1.6974e-14	down	hypothetical protein OsI_10313 [Oryza sativa Indica Group]
BGIOSGA011443	2061	1934	2468	749	565	642	2.50018	1.77436e-14	up	hypothetical protein OsI_10035 [Oryza sativa Indica Group]
BGIOSGA034550	743	719	831	90	124	53	6.33606	1.83662e-14	up	hypothetical protein OsI_35001 [Oryza sativa Indica Group]
BGIOSGA027841	6	2	20	134	96	113	0.0598814	1.83849e-14	down	hypothetical protein OsI_27520 [Oryza sativa Indica Group]
BGIOSGA027518	9231	14056	23546	2407	1647	2882	5.06662	1.83976e-14	up	PREDICTED: lactoylglutathione lyase [Oryza sativa Japonica Group]
BGIOSGA028538	0	0	0	112	71	106	0.00146284	1.84418e-14	down	hypothetical protein OsI_28972 [Oryza sativa Indica Group]
BGIOSGA020440	1572	1416	1154	4220	4103	3589	0.26497	1.85681e-14	down	hypothetical protein OsI_21147 [Oryza sativa Indica Group]
BGIOSGA016649	140	127	240	0	0	0	682.84	1.96901e-14	up	hypothetical protein OsI_16410 [Oryza sativa Indica Group]
BGIOSGA033475	805	569	1108	118	78	175	5.08654	2.05386e-14	up	hypothetical protein OsI_34718 [Oryza sativa Indica Group]
BGIOSGA008817	1648	1085	1451	310	305	316	3.39999	2.12198e-14	up	hypothetical protein OsI_08477 [Oryza sativa Indica Group]
BGIOSGA019276	119	146	254	0	0	0	697.399	2.15745e-14	up	hypothetical protein OsI_18685 [Oryza sativa Indica Group]
BGIOSGA011165	0	0	0	73	116	110	0.00138524	2.168e-14	down	hypothetical protein OsI_10647 [Oryza sativa Indica Group]
BGIOSGA032104	114	115	121	272	314	325	0.290171	2.18823e-14	down	hypothetical protein OsI_33158 [Oryza sativa Indica Group]
BGIOSGA001162	4966	5172	3971	12698	14183	12613	0.271762	2.2949e-14	down	PREDICTED: 50S ribosomal protein L31 [Oryza sativa Japonica Group]
BGIOSGA029710	291	372	674	17	35	55	9.27528	2.36708e-14	up	hypothetical protein OsI_31475 [Oryza sativa Indica Group]
BGIOSGA011886	168	104	272	0	0	0	728.887	2.36845e-14	up	PREDICTED: expansin-A12 [Oryza sativa Japonica Group]
BGIOSGA006287	0	0	0	108	71	99	0.00151803	2.56054e-14	down	hypothetical protein OsI_07593 [Oryza sativa Indica Group]
BGIOSGA005184	116	117	143	327	233	354	0.313618	2.96311e-14	down	PREDICTED: putative amidohydrolase YtcJ isoform X1 [Oryza sativa Japonica Group]
BGIOSGA037567	1496	1030	2004	262	242	369	3.90457	2.97547e-14	up	hypothetical protein OsI_38678 [Oryza sativa Indica Group]
BGIOSGA022167	553	567	741	169	135	124	3.26682	3.07963e-14	up	hypothetical protein OsI_21345 [Oryza sativa Indica Group]
BGIOSGA003980	189	189	710	8	11	24	18.4735	3.14838e-14	up	hypothetical protein OsI_02836 [Oryza sativa Indica Group]
BGIOSGA013714	4	9	7	71	68	60	0.075709	3.23836e-14	down	hypothetical protein OsI_13866 [Oryza sativa Indica Group]
BGIOSGA001879	411	204	272	32	33	37	6.6326	3.32427e-14	up	unnamed protein product [Coffea canephora]
BGIOSGA027868	141	156	148	0	0	0	612.989	3.38274e-14	up	hypothetical protein OsI_27565 [Oryza sativa Indica Group]
BGIOSGA029772	394	486	482	1017	1089	1740	0.270782	3.43918e-14	down	hypothetical protein OsI_31346 [Oryza sativa Indica Group]
BGIOSGA015249	2	0	0	245	108	130	0.00317659	3.50397e-14	down	hypothetical protein OsI_15545 [Oryza sativa Indica Group]
BGIOSGA005189	0	0	0	100	83	82	0.00157712	3.77904e-14	down	hypothetical protein OsJ_04790 [Oryza sativa Japonica Group]
BGIOSGA036170	0	0	0	87	66	131	0.00149657	3.80515e-14	down	hypothetical protein OsI_38379 [Oryza sativa Indica Group]
BGIOSGA034871	4295	4090	4171	9328	7424	7937	0.387182	4.17529e-14	down	PREDICTED: actin-7 [Oryza brachyantha]
BGIOSGA016424	189	193	259	43	29	43	4.22336	4.47592e-14	up	hypothetical protein OsI_15918 [Oryza sativa Indica Group]
BGIOSGA026666	79	96	309	4	2	3	39.1454	4.67473e-14	up	PREDICTED: xylanase inhibitor protein 2-like [Oryza sativa Japonica Group]
BGIOSGA011595	251	218	327	673	490	863	0.299188	4.94885e-14	down	hypothetical protein OsI_09686 [Oryza sativa Indica Group]
BGIOSGA034901	211	188	285	621	428	535	0.326121	5.02685e-14	down	hypothetical protein OsI_35296 [Oryza sativa Indica Group]
BGIOSGA032808	0	0	0	88	81	84	0.00165162	5.48363e-14	down	.
BGIOSGA011993	582	302	529	77	53	84	5.03395	5.63112e-14	up	PREDICTED: protein STRUBBELIG-RECEPTOR FAMILY 7-like [Oryza brachyantha]
BGIOSGA011553	238	235	836	15	17	36	14.0978	5.70485e-14	up	hypothetical protein OsI_09784 [Oryza sativa Indica Group]
BGIOSGA017187	5	4	3	86	51	52	0.0484762	6.44457e-14	down	OSJNBa0089N06.5 [Oryza sativa Japonica Group]
BGIOSGA030840	124	80	348	6	5	7	22.3002	6.73922e-14	up	PREDICTED: subtilisin-like protease SBT1.8 [Oryza sativa Japonica Group]
BGIOSGA025834	288	267	73	0	0	0	895.842	6.87982e-14	up	hypothetical protein OsI_26249 [Oryza sativa Indica Group]
BGIOSGA016538	122	109	250	0	0	0	642.812	7.01963e-14	up	hypothetical protein OsI_16159 [Oryza sativa Indica Group]
BGIOSGA010917	5377	4023	4610	10652	8838	10215	0.359575	7.13287e-14	down	PREDICTED: 7-hydroxymethyl chlorophyll a reductase, chloroplastic isoform X1 [Oryza sativa Japonica Group]
BGIOSGA008794	687	1417	1018	118	106	195	5.75573	7.30141e-14	up	hypothetical protein OsI_08440 [Oryza sativa Indica Group]
BGIOSGA007475	1397	1122	851	5047	4305	3276	0.203984	7.31926e-14	down	hypothetical protein OsI_05751 [Oryza sativa Indica Group]
BGIOSGA008616	0	0	0	101	112	62	0.00149443	7.93512e-14	down	hypothetical protein OsI_08055 [Oryza sativa Indica Group]
BGIOSGA016021	195	313	403	51	33	32	5.88377	8.06017e-14	up	hypothetical protein OsI_15126 [Oryza sativa Indica Group]
BGIOSGA009465	136	103	198	0	0	0	590.374	8.06748e-14	up	hypothetical protein OsI_14272 [Oryza sativa Indica Group]
BGIOSGA018930	2756	3989	7440	646	713	652	5.15846	8.1905e-14	up	hypothetical protein OsI_18205 [Oryza sativa Indica Group]
BGIOSGA027959	12	11	12	85	56	143	0.0954825	8.53666e-14	down	hypothetical protein OsI_27745 [Oryza sativa Indica Group]
BGIOSGA014430	4501	7098	8691	1647	1041	1298	3.84128	8.93137e-14	up	PREDICTED: uncharacterized protein LOC4336855 [Oryza sativa Japonica Group]
BGIOSGA018734	1360	1745	1804	3175	3253	4477	0.342147	9.45065e-14	down	PREDICTED: thioredoxin H4-2 [Oryza sativa Japonica Group]
BGIOSGA034713	1089	1433	1173	85	19	140	12.0696	9.62261e-14	up	PREDICTED: NAC transcription factor 29 [Oryza sativa Japonica Group]
BGIOSGA031907	196	219	196	506	497	469	0.314634	1.02317e-13	down	hypothetical protein OsI_33606 [Oryza sativa Indica Group]
BGIOSGA028327	191	104	142	0	0	0	602.05	1.03802e-13	up	hypothetical protein OsI_28512 [Oryza sativa Indica Group]
BGIOSGA017269	1151	1588	1202	3341	2778	4165	0.295596	1.10965e-13	down	OSIGBa0147J19.9 [Oryza sativa Indica Group]
BGIOSGA034285	6132	5707	7864	11466	12925	15939	0.367635	1.11496e-13	down	hypothetical protein OsI_35539 [Oryza sativa Indica Group]
BGIOSGA008983	492	436	433	923	941	1096	0.350339	1.18483e-13	down	PREDICTED: MADS-box transcription factor 57 isoform X2 [Oryza sativa Japonica Group]
BGIOSGA014081	1583	1365	1618	2661	2567	2940	0.423624	1.21781e-13	down	PREDICTED: tetraspanin-19 [Oryza sativa Japonica Group]
BGIOSGA031017	729	352	644	85	85	67	5.44955	1.22117e-13	up	PREDICTED: chitinase-like protein 1 [Oryza sativa Japonica Group]
BGIOSGA037649	185	235	331	1	0	0	522.244	1.24529e-13	up	hypothetical protein OsJ_36605 [Oryza sativa Japonica Group]
BGIOSGA010978	8	8	2	86	87	59	0.0590919	1.24918e-13	down	hypothetical protein OsI_11034 [Oryza sativa Indica Group]
BGIOSGA018890	878	1769	2097	139	198	262	5.92486	1.34689e-13	up	hypothetical protein OsI_18297 [Oryza sativa Indica Group]
BGIOSGA019844	1173	909	1411	292	235	359	2.98931	1.4104e-13	up	hypothetical protein OsI_19907 [Oryza sativa Indica Group]
BGIOSGA018028	76	68	56	194	242	258	0.219459	1.4543e-13	down	hypothetical protein OsI_20023 [Oryza sativa Indica Group]
BGIOSGA012176	132	102	157	0	0	0	532.6	1.54065e-13	up	hypothetical protein OsI_10628 [Oryza sativa Indica Group]
BGIOSGA021931	243	69	158	0	4	5	39.5118	1.54971e-13	up	PREDICTED: dirigent protein 1 [Oryza sativa Japonica Group]
BGIOSGA010395	4296	3903	3336	10274	8873	8814	0.315376	1.61069e-13	down	hypothetical protein OsI_12322 [Oryza sativa Indica Group]
BGIOSGA027481	532	708	301	2408	1974	2662	0.171309	1.63224e-13	down	hypothetical protein OsI_28180 [Oryza sativa Indica Group]
BGIOSGA009682	202	81	217	5	12	9	14.2108	1.65914e-13	up	PREDICTED: fasciclin-like arabinogalactan protein 16 [Oryza sativa Japonica Group]
BGIOSGA005417	0	0	0	66	71	98	0.0017876	1.66727e-13	down	hypothetical protein OsI_09324 [Oryza sativa Indica Group]
BGIOSGA028539	0	0	0	99	60	77	0.00178672	1.72529e-13	down	hypothetical protein OsI_28973 [Oryza sativa Indica Group]
BGIOSGA018410	310	427	639	64	79	77	4.63334	1.7857e-13	up	hypothetical protein OsI_19228 [Oryza sativa Indica Group]
BGIOSGA000953	119	149	113	403	539	392	0.214919	1.81746e-13	down	RecName: Full=Bifunctional nuclease 1
BGIOSGA024600	135	193	101	0	0	0	600.558	1.85553e-13	up	hypothetical protein OsI_25380 [Oryza sativa Indica Group]
BGIOSGA023805	104	117	165	0	0	0	523.979	1.85901e-13	up	hypothetical protein OsI_27123 [Oryza sativa Indica Group]
BGIOSGA035072	2107	1245	2422	392	370	433	3.62337	1.93722e-13	up	PREDICTED: tubulin alpha-2 chain [Oryza sativa Japonica Group]
BGIOSGA006939	807	870	1891	157	161	215	4.94457	1.95532e-13	up	hypothetical protein OsI_06253 [Oryza sativa Indica Group]
BGIOSGA023866	102	110	194	0	0	0	546.614	1.95701e-13	up	hypothetical protein OsI_26969 [Oryza sativa Indica Group]
BGIOSGA015002	4	2	0	62	81	54	0.0229609	1.96135e-13	down	hypothetical protein OsI_16080 [Oryza sativa Indica Group]
BGIOSGA016648	5	0	1	57	63	66	0.024454	2.02918e-13	down	hypothetical protein OsI_16407 [Oryza sativa Indica Group]
BGIOSGA028406	146	141	144	421	277	357	0.312598	2.07236e-13	down	hypothetical protein OsI_28684 [Oryza sativa Indica Group]
BGIOSGA019828	1470	1488	1836	580	462	561	2.26473	2.09006e-13	up	hypothetical protein OsI_19879 [Oryza sativa Indica Group]
BGIOSGA016516	105	106	188	0	0	0	537.738	2.09386e-13	up	hypothetical protein OsI_16109 [Oryza sativa Indica Group]
BGIOSGA015947	0	0	0	82	72	70	0.00186392	2.14077e-13	down	hypothetical protein OsI_14960 [Oryza sativa Indica Group]
BGIOSGA019501	159	207	128	843	465	581	0.203003	2.20212e-13	down	hypothetical protein OsI_19211 [Oryza sativa Indica Group]
BGIOSGA018726	1837	1484	1369	3819	3503	3821	0.321989	2.26124e-13	down	PREDICTED: uncharacterized protein LOC4337940 [Oryza sativa Japonica Group]
BGIOSGA015968	121	98	87	0	3	2	46.6853	2.26983e-13	up	PREDICTED: CDT1-like protein a, chloroplastic [Oryza sativa Japonica Group]
BGIOSGA012042	397	187	165	19	3	14	16.5221	2.27862e-13	up	hypothetical protein OsI_10370 [Oryza sativa Indica Group]
BGIOSGA013833	802	1441	1827	196	108	253	5.57642	2.31149e-13	up	hypothetical protein OsI_14096 [Oryza sativa Indica Group]
BGIOSGA015230	0	0	0	78	60	84	0.00189822	2.36257e-13	down	hypothetical protein OsI_15575 [Oryza sativa Indica Group]
BGIOSGA008065	1050	1136	2583	203	105	256	6.35522	2.36864e-13	up	hypothetical protein OsI_06959 [Oryza sativa Indica Group]
BGIOSGA015592	103	112	156	0	0	0	504.154	2.56176e-13	up	hypothetical protein OsI_14854 [Oryza sativa Indica Group]
BGIOSGA012402	2813	2714	2329	5582	6869	7334	0.302393	2.57302e-13	down	hypothetical protein OsI_11120 [Oryza sativa Indica Group]
BGIOSGA005748	198	140	495	2	5	19	23.8576	2.57373e-13	up	hypothetical protein OsI_08667 [Oryza sativa Indica Group]
BGIOSGA028579	123	141	153	295	280	339	0.345747	2.67997e-13	down	hypothetical protein OsI_29062 [Oryza sativa Indica Group]
BGIOSGA009298	9151	7933	9599	2577	1990	3227	2.62184	2.7183e-13	up	Os02g0818000, partial [Oryza sativa Japonica Group]
BGIOSGA036316	85	87	107	3	0	7	21.4353	2.76078e-13	up	hypothetical protein OsI_38091 [Oryza sativa Indica Group]
BGIOSGA024197	116	74	365	0	3	5	50.0628	2.83581e-13	up	hypothetical protein OsI_26266 [Oryza sativa Indica Group]
BGIOSGA036090	0	0	0	73	61	82	0.00194773	3.00838e-13	down	hypothetical protein OsI_38525 [Oryza sativa Indica Group]
BGIOSGA027233	0	0	0	104	88	52	0.00169514	3.02132e-13	down	hypothetical protein OsI_28686 [Oryza sativa Indica Group]
BGIOSGA027328	140	134	526	10	5	17	18.4052	3.02884e-13	up	PREDICTED: uncharacterized protein LOC4345109 [Oryza sativa Japonica Group]
BGIOSGA017770	376	311	460	101	62	74	3.66054	3.1326e-13	up	hypothetical protein OsI_20525 [Oryza sativa Indica Group]
BGIOSGA006145	184	146	155	496	506	392	0.262257	3.13887e-13	down	hypothetical protein OsI_07869 [Oryza sativa Indica Group]
BGIOSGA010430	107	125	125	0	0	0	490.469	3.15522e-13	up	hypothetical protein OsI_12258 [Oryza sativa Indica Group]
BGIOSGA037692	101	114	144	0	0	0	489.349	3.20182e-13	up	hypothetical protein OsI_38922 [Oryza sativa Indica Group]
BGIOSGA008895	655	561	764	1240	1036	1225	0.42751	3.23819e-13	down	hypothetical protein OsI_08637 [Oryza sativa Indica Group]
BGIOSGA037619	158	196	177	859	563	443	0.216035	3.27145e-13	down	PREDICTED: importin subunit beta-1 [Oryza sativa Japonica Group]
BGIOSGA002484	1712	3954	6257	76	193	379	13.7126	3.42338e-13	up	PREDICTED: Bowman-Birk type bran trypsin inhibitor [Oryza sativa Japonica Group]
BGIOSGA034482	1574	1301	1278	2864	3128	3517	0.33282	3.61932e-13	down	hypothetical protein OsJ_32987 [Oryza sativa Japonica Group]
BGIOSGA027337	123	138	126	435	312	308	0.279294	3.65031e-13	down	hypothetical protein OsI_28489 [Oryza sativa Indica Group]
BGIOSGA008777	49	52	37	246	228	149	0.167757	3.82625e-13	down	hypothetical protein OsI_08398 [Oryza sativa Indica Group]
BGIOSGA030561	2	5	3	66	37	69	0.0448017	3.83895e-13	down	hypothetical protein OsI_30980 [Oryza sativa Indica Group]
BGIOSGA031327	198	107	95	640	794	539	0.153655	3.8715e-13	down	hypothetical protein OsJ_32596 [Oryza sativa Japonica Group]
BGIOSGA002862	4436	5866	7823	1118	551	1366	4.58179	3.9251e-13	up	hypothetical protein OsI_00575 [Oryza sativa Indica Group]
BGIOSGA030696	120	92	145	0	0	0	485.94	3.9943e-13	up	hypothetical protein SETIT_014961mg, partial [Setaria italica]
BGIOSGA026270	57	63	78	204	198	170	0.259307	4.12811e-13	down	hypothetical protein OsI_27116 [Oryza sativa Indica Group]
BGIOSGA028598	0	0	0	140	62	56	0.001632	4.15225e-13	down	hypothetical protein OsI_29093 [Oryza sativa Indica Group]
BGIOSGA001992	278	153	197	26	26	25	6.20081	4.22381e-13	up	hypothetical protein OsI_01177 [Oryza sativa Indica Group]
BGIOSGA011611	209	209	206	0	1	0	441.434	4.39509e-13	up	PREDICTED: branched-chain-amino-acid aminotransferase 5, chloroplastic isoform X1 [Oryza sativa Japonica Group]
BGIOSGA004780	89	81	91	251	170	256	0.29511	4.42256e-13	down	hypothetical protein OsI_04400 [Oryza sativa Indica Group]
BGIOSGA023708	182	208	359	35	34	43	4.98342	4.45566e-13	up	hypothetical protein OsI_27347 [Oryza sativa Indica Group]
BGIOSGA004463	141	190	297	12	24	8	10.3408	4.47176e-13	up	RecName: Full=Cellulose synthase A catalytic subunit 4 [UDP-forming]; AltName: Full=OsCesA4
BGIOSGA009220	187	152	340	30	25	31	5.8643	4.70229e-13	up	hypothetical protein OsI_09307 [Oryza sativa Indica Group]
BGIOSGA017046	102	109	123	0	0	0	457.53	5.77411e-13	up	hypothetical protein OsI_17247 [Oryza sativa Indica Group]
BGIOSGA005186	106	84	182	0	0	0	499.687	6.01193e-13	up	hypothetical protein OsI_05231 [Oryza sativa Indica Group]
BGIOSGA034254	18	30	39	107	117	137	0.180625	6.09869e-13	down	hypothetical protein OsI_35604 [Oryza sativa Indica Group]
BGIOSGA034890	0	0	0	93	90	47	0.00178974	6.44754e-13	down	hypothetical protein OsI_35285 [Oryza sativa Indica Group]
BGIOSGA004776	60	98	52	298	324	850	0.112542	6.53854e-13	down	RecName: Full=Elicitor-responsive protein 1; AltName: Full=17 kDa phloem protein; AltName: Full=Fungal elicitor immediate early-responsive gene 1 protein; Short=FIERG1; AltName: Full=RPP17
BGIOSGA002432	452	529	1376	92	53	101	7.10215	6.83932e-13	up	hypothetical protein OsI_00311 [Oryza sativa Indica Group]
BGIOSGA012226	275	142	293	24	24	38	6.23588	6.93114e-13	up	hypothetical protein OsI_10736 [Oryza sativa Indica Group]
BGIOSGA024086	5440	4523	3341	18218	14663	12074	0.226916	7.0322e-13	down	hypothetical protein OsI_26483 [Oryza sativa Indica Group]
BGIOSGA011225	482	542	941	136	70	125	4.47664	7.69639e-13	up	hypothetical protein OsI_10493 [Oryza sativa Indica Group]
BGIOSGA014799	302	296	1052	11	11	47	17.8236	7.82795e-13	up	hypothetical protein OsI_16485 [Oryza sativa Indica Group]
BGIOSGA015273	100	118	161	16	14	17	6.0651	8.11983e-13	up	hypothetical protein OsJ_14429 [Oryza sativa Japonica Group]
BGIOSGA031177	2017	1255	2224	39	55	230	13.196	8.40714e-13	up	PREDICTED: probable aquaporin PIP2-7 [Oryza sativa Japonica Group]
BGIOSGA008086	120	94	75	7	3	3	17.1646	8.50622e-13	up	hypothetical protein OsI_06990 [Oryza sativa Indica Group]
BGIOSGA028601	23	35	37	165	115	109	0.184345	8.61501e-13	down	PREDICTED: uncharacterized protein LOC4345461 isoform X1 [Oryza sativa Japonica Group]
BGIOSGA024526	770	737	918	1354	1265	1721	0.423929	8.74054e-13	down	hypothetical protein OsI_25527 [Oryza sativa Indica Group]
BGIOSGA028073	3	11	17	89	68	172	0.0715507	8.80575e-13	down	hypothetical protein OsI_27997 [Oryza sativa Indica Group]
BGIOSGA033008	501	527	1141	102	110	122	4.77632	9.07561e-13	up	PREDICTED: beta-glucuronosyltransferase GlcAT14A [Oryza sativa Japonica Group]
BGIOSGA034640	175	194	229	38	18	15	6.37806	9.62064e-13	up	hypothetical protein OsI_34817 [Oryza sativa Indica Group]
BGIOSGA006328	103	89	130	0	0	0	438.564	9.74234e-13	up	hypothetical protein OsI_07504 [Oryza sativa Indica Group]
BGIOSGA008613	0	0	0	86	76	48	0.00197068	1.03132e-12	down	hypothetical protein OsI_08051 [Oryza sativa Indica Group]
BGIOSGA021611	70	100	507	0	3	2	94.775	1.04751e-12	up	hypothetical protein OsI_22249 [Oryza sativa Indica Group]
BGIOSGA036642	229	129	274	1	0	0	439.426	1.06456e-12	up	hypothetical protein OsI_37447 [Oryza sativa Indica Group]
BGIOSGA030552	68	74	104	3	5	4	15.3445	1.11501e-12	up	hypothetical protein OsI_30961 [Oryza sativa Indica Group]
BGIOSGA030438	106	82	132	0	0	0	435.166	1.22039e-12	up	hypothetical protein OsI_30708 [Oryza sativa Indica Group]
BGIOSGA036904	192	198	270	17	33	39	5.5561	1.23657e-12	up	hypothetical protein OsI_37275 [Oryza sativa Indica Group]
BGIOSGA005297	142	105	154	292	296	347	0.323566	1.26819e-12	down	RecName: Full=Outer envelope pore protein 21, chloroplastic; AltName: Full=Chloroplastic outer envelope pore protein of 21 kDa
BGIOSGA032917	488	461	449	109	105	136	3.05283	1.29056e-12	up	PREDICTED: chitinase 1 [Oryza sativa Japonica Group]
BGIOSGA012500	913	1062	968	292	228	314	2.70443	1.31266e-12	up	hypothetical protein OsI_11309 [Oryza sativa Indica Group]
BGIOSGA015381	222	136	64	0	0	0	597.824	1.36007e-12	up	OSJNBb0018A10.11 [Oryza sativa Japonica Group]
BGIOSGA021232	454	293	658	74	71	93	4.40486	1.36928e-12	up	hypothetical protein OsI_22999 [Oryza sativa Indica Group]
BGIOSGA034275	528	329	504	1007	1291	1368	0.278923	1.37534e-12	down	hypothetical protein OsI_35561 [Oryza sativa Indica Group]
BGIOSGA021574	1265	1011	1269	2091	1935	2356	0.42151	1.37548e-12	down	hypothetical protein OsI_22316 [Oryza sativa Indica Group]
BGIOSGA023825	65	39	37	187	246	191	0.170805	1.43274e-12	down	hypothetical protein OsI_27071 [Oryza sativa Indica Group]
BGIOSGA034451	94	118	100	0	0	0	430.658	1.44983e-12	up	hypothetical protein OsI_35219 [Oryza sativa Indica Group]
BGIOSGA011770	716	1664	5580	3	0	0	1934.64	1.47935e-12	up	PREDICTED: defensin-like protein [Oryza sativa Japonica Group]
BGIOSGA023756	2465	2552	5242	639	646	633	3.93106	1.49539e-12	up	hypothetical protein OsI_27243 [Oryza sativa Indica Group]
BGIOSGA013023	21925	20726	16029	50613	45625	47224	0.313694	1.50583e-12	down	hypothetical protein OsI_12389 [Oryza sativa Indica Group]
BGIOSGA027214	1056	1020	1208	1811	1504	1936	0.475206	1.52011e-12	down	hypothetical protein OsI_28732 [Oryza sativa Indica Group]
BGIOSGA024202	83	68	217	2	0	4	45.5308	1.60321e-12	up	hypothetical protein OsI_26255 [Oryza sativa Indica Group]
BGIOSGA033377	82	88	159	9	5	11	9.8824	1.61331e-12	up	PREDICTED: putative quinone-oxidoreductase homolog, chloroplastic [Oryza sativa Japonica Group]
BGIOSGA034382	1205	725	1134	90	160	197	5.16025	1.65968e-12	up	hypothetical protein OsI_35363 [Oryza sativa Indica Group]
BGIOSGA022925	32	49	28	144	125	201	0.179617	1.66715e-12	down	hypothetical protein OsI_23005 [Oryza sativa Indica Group]
BGIOSGA023984	112	109	176	18	12	20	5.98473	1.75936e-12	up	hypothetical protein OsI_26696 [Oryza sativa Indica Group]
BGIOSGA034441	161	154	210	31	12	30	5.50225	1.80799e-12	up	PREDICTED: uncharacterized protein LOC4349862 isoform X1 [Oryza sativa Japonica Group]
BGIOSGA003233	145	51	412	0	1	3	109.98	1.87862e-12	up	PREDICTED: peroxidase 24 [Oryza sativa Japonica Group]
BGIOSGA014269	27	29	19	99	94	136	0.175585	1.89386e-12	down	hypothetical protein OsI_17585 [Oryza sativa Indica Group]
BGIOSGA037658	401	282	431	786	671	938	0.352827	1.91631e-12	down	hypothetical protein OsI_38857 [Oryza sativa Indica Group]
BGIOSGA024241	2565	1960	1923	4720	6099	6117	0.289034	1.9907e-12	down	PREDICTED: lon protease [Oryza sativa Japonica Group]
BGIOSGA020741	1007	767	630	2507	2100	2174	0.27245	2.00115e-12	down	hypothetical protein OsI_24002 [Oryza sativa Indica Group]
EPlOING00000044596	8	9	10	87	54	55	0.10446	2.06101e-12	down	.
BGIOSGA009151	73	68	152	3	4	6	16.7063	2.06109e-12	up	hypothetical protein OsI_09176 [Oryza sativa Indica Group]
BGIOSGA008727	336	657	2651	56	34	74	16.1096	2.07697e-12	up	.
BGIOSGA007076	133	102	83	0	0	0	442.677	2.08006e-12	up	hypothetical protein OsI_05970 [Oryza sativa Indica Group]
BGIOSGA022419	363	233	303	63	47	43	4.45943	2.11406e-12	up	PREDICTED: pyrophosphate-energized vacuolar membrane proton pump [Oryza sativa Japonica Group]
BGIOSGA028722	543	971	2839	103	113	106	9.6815	2.12114e-12	up	hypothetical protein OsI_29344 [Oryza sativa Indica Group]
BGIOSGA036834	187	222	196	37	14	33	5.5812	2.13433e-12	up	hypothetical protein OsI_37111 [Oryza sativa Indica Group]
BGIOSGA018407	138	135	143	302	259	397	0.332286	2.26097e-12	down	PREDICTED: serine carboxypeptidase 2 isoform X3 [Oryza sativa Japonica Group]
BGIOSGA036220	32	6	3	279	187	214	0.0474597	2.27841e-12	down	hypothetical protein OsI_38276 [Oryza sativa Indica Group]
BGIOSGA011570	0	0	0	58	62	58	0.00233804	2.34342e-12	down	hypothetical protein OsI_09746 [Oryza sativa Indica Group]
BGIOSGA015258	0	0	0	58	50	70	0.00236506	2.3528e-12	down	hypothetical protein OsI_15530 [Oryza sativa Indica Group]
BGIOSGA028554	348	171	622	46	26	26	8.57462	2.35588e-12	up	hypothetical protein OsI_29006 [Oryza sativa Indica Group]
BGIOSGA015208	0	0	0	67	50	59	0.00238636	2.59736e-12	down	hypothetical protein OsI_15637 [Oryza sativa Indica Group]
BGIOSGA021048	192	63	154	5	8	8	14.6358	2.68679e-12	up	hypothetical protein OsI_23349 [Oryza sativa Indica Group]
BGIOSGA015169	1623	184	847	1	2	0	653.352	2.77953e-12	up	Pi21 protein [Oryza sativa Indica Group]
BGIOSGA013814	988	1534	1245	2873	4026	6015	0.223133	2.78976e-12	down	stress-induced transcription factor NAC1 [Oryza sativa Japonica Group]
BGIOSGA019247	171	193	218	403	352	385	0.385909	2.80513e-12	down	hypothetical protein OsI_18610 [Oryza sativa Indica Group]
BGIOSGA018836	465	442	515	152	101	136	2.78658	2.83188e-12	up	PREDICTED: uncharacterized protein LOC4337766 [Oryza sativa Japonica Group]
BGIOSGA002520	96	90	72	1	1	3	39.8132	2.84305e-12	up	hypothetical protein OsI_00128 [Oryza sativa Indica Group]
BGIOSGA016415	11	9	14	66	55	69	0.13533	2.85422e-12	down	hypothetical protein OsJ_14811 [Oryza sativa Japonica Group]
BGIOSGA009372	0	0	0	80	42	62	0.00230094	2.90311e-12	down	hypothetical protein OsI_14465 [Oryza sativa Indica Group]
BGIOSGA005810	0	0	0	71	45	61	0.0023835	2.96435e-12	down	hypothetical protein OsI_08531 [Oryza sativa Indica Group]
BGIOSGA004331	4	13	3	68	75	76	0.0700773	2.96456e-12	down	hypothetical protein OsI_03505 [Oryza sativa Indica Group]
BGIOSGA009473	0	0	1	95	89	117	0.00271821	3.20437e-12	down	hypothetical protein OsI_14260 [Oryza sativa Indica Group]
BGIOSGA020637	1021	888	854	2343	1871	1861	0.346866	3.20654e-12	down	hypothetical protein OsI_24262 [Oryza sativa Indica Group]
BGIOSGA008533	257	166	318	42	41	38	4.57016	3.22234e-12	up	hypothetical protein OsI_07890 [Oryza sativa Indica Group]
BGIOSGA005354	93	67	159	0	0	0	427.815	3.35481e-12	up	hypothetical protein OsI_09458 [Oryza sativa Indica Group]
BGIOSGA009600	84	79	203	7	6	9	12.278	3.36563e-12	up	PREDICTED: probable cellulose synthase A catalytic subunit 2 [UDP-forming] [Oryza sativa Japonica Group]
BGIOSGA028077	5	2	5	57	53	43	0.0587272	3.42928e-12	down	hypothetical protein OsI_28004 [Oryza sativa Indica Group]
BGIOSGA000088	622	412	594	130	103	85	3.85655	3.51871e-12	up	hypothetical protein OsI_05247 [Oryza sativa Indica Group]
BGIOSGA036761	390	400	468	114	104	87	3.10266	3.79222e-12	up	hypothetical protein OsI_37233 [Oryza sativa Indica Group]
BGIOSGA028374	1	3	0	81	59	44	0.0165338	3.97824e-12	down	hypothetical protein OsI_28604 [Oryza sativa Indica Group]
BGIOSGA008042	37	49	37	172	125	130	0.219972	4.0615e-12	down	hypothetical protein OsI_06907 [Oryza sativa Indica Group]
BGIOSGA011002	108	77	137	0	2	1	80.2438	4.11677e-12	up	hypothetical protein OsI_10990 [Oryza sativa Indica Group]
BGIOSGA037768	69	60	116	2	3	2	25.9914	4.27361e-12	up	hypothetical protein OsI_39052 [Oryza sativa Indica Group]
BGIOSGA026375	3263	2990	3721	862	1024	899	2.68045	4.39238e-12	up	hypothetical protein OsI_27304 [Oryza sativa Indica Group]
BGIOSGA002368	0	1	0	106	90	94	0.00280953	4.40733e-12	down	hypothetical protein OsI_00460 [Oryza sativa Indica Group]
BGIOSGA008277	5	2	2	49	44	50	0.0479078	4.5287e-12	down	hypothetical protein OsI_07346 [Oryza sativa Indica Group]
BGIOSGA014578	7400	8799	10241	14518	13988	18154	0.428763	4.53122e-12	down	hypothetical protein OsI_16932 [Oryza sativa Indica Group]
BGIOSGA016199	0	0	0	46	48	86	0.00235051	4.64989e-12	down	PREDICTED: putative ripening-related protein 1 [Oryza sativa Japonica Group]
BGIOSGA029921	506	575	597	112	80	169	3.58162	4.70018e-12	up	hypothetical protein OsI_31020 [Oryza sativa Indica Group]
BGIOSGA026864	154	129	164	325	276	313	0.37034	5.08009e-12	down	hypothetical protein OsI_29490 [Oryza sativa Indica Group]
BGIOSGA036906	0	0	0	43	48	98	0.00224628	5.19424e-12	down	hypothetical protein OsI_37282 [Oryza sativa Indica Group]
BGIOSGA024403	2679	1418	1738	374	217	162	5.91593	5.32807e-12	up	hypothetical protein OsI_25789 [Oryza sativa Indica Group]
BGIOSGA011042	2371	1539	1738	350	430	401	3.62062	5.38049e-12	up	PREDICTED: fructose-1,6-bisphosphatase, chloroplastic [Oryza sativa Japonica Group]
EPlOING00000038905	0	0	0	42	52	85	0.00235539	5.4271e-12	down	.
BGIOSGA020606	865	118	349	7	10	27	23.6847	5.61084e-12	up	PREDICTED: probable xyloglucan endotransglucosylase/hydrolase protein 25 [Oryza sativa Japonica Group]
BGIOSGA011752	364	265	705	61	50	77	5.26776	5.70084e-12	up	hypothetical protein OsI_09797 [Oryza sativa Indica Group]
BGIOSGA023589	22	18	20	77	77	91	0.185878	5.7908e-12	down	hypothetical protein OsI_24430 [Oryza sativa Indica Group]
BGIOSGA018701	83	115	81	0	0	0	387.002	6.01143e-12	up	hypothetical protein OsI_18670 [Oryza sativa Indica Group]
BGIOSGA028412	335	324	305	685	535	788	0.369067	6.23086e-12	down	hypothetical protein OsI_28693 [Oryza sativa Indica Group]
BGIOSGA027401	3165	2698	3431	5399	4656	5112	0.463382	6.33686e-12	down	PREDICTED: probable mannose-1-phosphate guanylyltransferase 3 [Oryza sativa Japonica Group]
BGIOSGA004836	1012	1093	1068	1808	1712	1995	0.437709	6.39513e-12	down	hypothetical protein OsI_04508 [Oryza sativa Indica Group]
BGIOSGA016114	1412	1035	809	236	146	145	4.77582	6.54388e-12	up	hypothetical protein OsI_15327 [Oryza sativa Indica Group]
BGIOSGA002805	8	4	6	60	44	53	0.087196	6.62677e-12	down	hypothetical protein OsI_00436 [Oryza sativa Indica Group]
BGIOSGA037582	74	87	103	0	0	0	360.494	6.67507e-12	up	hypothetical protein OsI_38706 [Oryza sativa Indica Group]
BGIOSGA027252	116	111	109	18	11	12	6.26036	6.67747e-12	up	hypothetical protein OsI_28656 [Oryza sativa Indica Group]
BGIOSGA000310	208	210	261	60	39	50	3.45769	6.67894e-12	up	hypothetical protein OsI_04817 [Oryza sativa Indica Group]
BGIOSGA034514	89	76	125	347	403	239	0.215683	6.73747e-12	down	hypothetical protein OsI_35074 [Oryza sativa Indica Group]
EPlOING00000036670	5	6	10	49	47	73	0.0939495	7.04293e-12	down	.
BGIOSGA020614	604	594	834	152	172	212	2.84948	7.11125e-12	up	hypothetical protein OsI_24302 [Oryza sativa Indica Group]
BGIOSGA014362	335	348	493	104	66	61	3.82387	7.40624e-12	up	PREDICTED: cell differentiation protein RCD1 homolog [Oryza sativa Japonica Group]
BGIOSGA006176	1798	1541	1225	3505	3898	4395	0.296691	7.4119e-12	down	hypothetical protein OsI_07814 [Oryza sativa Indica Group]
BGIOSGA002369	5	1	0	79	56	43	0.0257834	7.59328e-12	down	hypothetical protein OsI_00459 [Oryza sativa Indica Group]
BGIOSGA020255	297	319	241	775	666	663	0.311665	7.70662e-12	down	PREDICTED: calcineurin B-like protein 4 isoform X2 [Oryza sativa Japonica Group]
BGIOSGA034544	240	174	235	24	38	18	6.01719	7.76569e-12	up	hypothetical protein OsI_35010 [Oryza sativa Indica Group]
BGIOSGA001815	1304	965	2212	315	178	311	4.18854	7.9034e-12	up	PREDICTED: UPF0481 protein At3g47200 [Oryza sativa Japonica Group]
BGIOSGA005986	47	34	28	147	106	180	0.195221	7.90909e-12	down	hypothetical protein OsI_08178 [Oryza sativa Indica Group]
BGIOSGA028260	91	75	66	1	3	3	25.3556	8.0196e-12	up	hypothetical protein OsI_28374 [Oryza sativa Indica Group]
BGIOSGA036617	658	470	479	1225	1302	1361	0.314798	8.38179e-12	down	PREDICTED: transcription factor TGA6 [Oryza sativa Japonica Group]
BGIOSGA021451	305	219	128	954	1053	835	0.176176	8.52054e-12	down	hypothetical protein OsI_22536 [Oryza sativa Indica Group]
BGIOSGA006004	749	499	1119	140	111	187	4.05979	8.5341e-12	up	hypothetical protein OsI_08139 [Oryza sativa Indica Group]
BGIOSGA027529	213	157	137	27	17	14	6.71136	9.07581e-12	up	PREDICTED: CRS2-associated factor 2, mitochondrial [Oryza sativa Japonica Group]
EPlOING00000046929	11	3	22	158	107	76	0.0772212	9.25344e-12	down	.
BGIOSGA013779	78	69	102	5	1	8	13.591	9.69742e-12	up	unknown protein [Oryza sativa Japonica Group]
BGIOSGA017217	2931	2018	1777	7563	6675	5755	0.257155	1.00232e-11	down	PREDICTED: uncharacterized aarF domain-containing protein kinase At1g71810, chloroplastic isoform X1 [Oryza sativa Japonica Group]
BGIOSGA016301	519	600	498	1192	922	1213	0.373423	1.00533e-11	down	PREDICTED: uncharacterized protein At2g33490 [Oryza sativa Japonica Group]
BGIOSGA015816	157	150	224	442	297	520	0.320834	1.05774e-11	down	hypothetical protein OsI_14685 [Oryza sativa Indica Group]
BGIOSGA029913	0	0	0	67	46	45	0.00265124	1.07128e-11	down	hypothetical protein OsI_31034 [Oryza sativa Indica Group]
BGIOSGA011409	6	1	4	58	35	63	0.0540429	1.10273e-11	down	hypothetical protein OsI_10112 [Oryza sativa Indica Group]
BGIOSGA029975	148	158	132	430	361	325	0.298643	1.11156e-11	down	hypothetical protein OsI_30909 [Oryza sativa Indica Group]
BGIOSGA037662	1433	1118	1037	3250	3146	2654	0.301277	1.15067e-11	down	hypothetical protein OsI_38863 [Oryza sativa Indica Group]
BGIOSGA018692	74	68	117	0	0	0	350.182	1.17045e-11	up	hypothetical protein OsI_18688 [Oryza sativa Indica Group]
BGIOSGA017114	97	57	114	0	0	0	363.547	1.18561e-11	up	hypothetical protein OsI_17384 [Oryza sativa Indica Group]
BGIOSGA013765	331	225	343	58	62	70	3.56736	1.19591e-11	up	hypothetical protein OsI_13969 [Oryza sativa Indica Group]
BGIOSGA014247	770	677	994	234	222	278	2.50539	1.22936e-11	up	hypothetical protein OsI_17631 [Oryza sativa Indica Group]
BGIOSGA029853	535	691	1062	81	31	137	7.08234	1.23659e-11	up	Os09g0379600 [Oryza sativa Japonica Group]
BGIOSGA023588	1082	995	1034	1857	1539	1946	0.444813	1.25776e-11	down	hypothetical protein OsI_24429 [Oryza sativa Indica Group]
BGIOSGA002756	1226	1862	1508	3871	3262	3368	0.333174	1.2723e-11	down	hypothetical protein OsI_00342 [Oryza sativa Indica Group]
BGIOSGA014319	2887	3870	6991	661	468	1045	4.76758	1.28354e-11	up	hypothetical protein OsI_17477 [Oryza sativa Indica Group]
BGIOSGA008920	421	277	463	42	49	92	4.82352	1.28354e-11	up	hypothetical protein OsI_08688 [Oryza sativa Indica Group]
BGIOSGA036344	790	895	896	1700	1497	1490	0.417016	1.29966e-11	down	hypothetical protein OsI_38036 [Oryza sativa Indica Group]
BGIOSGA014064	3	1	0	64	82	39	0.016155	1.32952e-11	down	hypothetical protein OsI_17974 [Oryza sativa Indica Group]
BGIOSGA031408	1125	1004	1391	1885	2003	2375	0.423052	1.35262e-11	down	PREDICTED: zinc finger protein CONSTANS-LIKE 2 [Oryza sativa Japonica Group]
BGIOSGA011046	95	89	119	1	10	7	12.5105	1.38088e-11	up	hypothetical protein OsI_10882 [Oryza sativa Indica Group]
BGIOSGA019116	2	0	0	59	82	132	0.00560015	1.44237e-11	down	PREDICTED: ocs element-binding factor 1 [Oryza sativa Japonica Group]
BGIOSGA036829	319	298	316	900	634	606	0.331226	1.45934e-11	down	hypothetical protein OsI_37106 [Oryza sativa Indica Group]
BGIOSGA036053	63	90	96	0	0	0	340.349	1.47232e-11	up	hypothetical protein OsI_38618 [Oryza sativa Indica Group]
BGIOSGA003294	567	324	696	46	57	110	5.63158	1.4864e-11	up	hypothetical protein OsI_01455 [Oryza sativa Indica Group]
BGIOSGA006041	0	0	0	76	78	29	0.00223403	1.55533e-11	down	.
BGIOSGA034866	82	128	64	0	0	0	383.647	1.567e-11	up	NB-ARC domain, putative [Oryza sativa Japonica Group]
BGIOSGA036757	1230	585	618	2905	2621	3290	0.213032	1.5754e-11	down	hypothetical protein OsI_37239 [Oryza sativa Indica Group]
BGIOSGA002549	123	164	368	21	10	26	8.58046	1.61383e-11	up	hypothetical protein OsI_00056 [Oryza sativa Indica Group]
BGIOSGA014628	837	865	1755	174	215	243	4.03013	1.63828e-11	up	hypothetical protein OsI_16833 [Oryza sativa Indica Group]
BGIOSGA036501	30334	32170	28006	65284	67395	58687	0.358383	1.65285e-11	down	hypothetical protein OsI_37726 [Oryza sativa Indica Group]
BGIOSGA003650	0	0	0	65	55	37	0.0026415	1.65593e-11	down	hypothetical protein OsI_02207 [Oryza sativa Indica Group]
BGIOSGA001422	4650	4383	3232	11407	8653	10166	0.313348	1.68091e-11	down	hypothetical protein OsI_02412 [Oryza sativa Indica Group]
BGIOSGA027866	0	0	0	82	40	42	0.00256907	1.69192e-11	down	hypothetical protein OsI_27563 [Oryza sativa Indica Group]
BGIOSGA005442	832	780	598	178	157	156	3.45164	1.69257e-11	up	hypothetical protein OsI_09273 [Oryza sativa Indica Group]
BGIOSGA009573	122	51	103	0	0	0	377.234	1.70401e-11	up	hypothetical protein OsI_14052 [Oryza sativa Indica Group]
BGIOSGA016749	437	462	535	116	76	51	4.44161	1.73601e-11	up	hypothetical protein OsI_16605 [Oryza sativa Indica Group]
BGIOSGA022541	26	20	18	82	119	98	0.161285	1.76206e-11	down	hypothetical protein OsI_22128 [Oryza sativa Indica Group]
BGIOSGA015031	115	212	64	1	2	0	101.029	1.93074e-11	up	hypothetical protein OsI_16021 [Oryza sativa Indica Group]
BGIOSGA008520	387	241	422	784	926	879	0.302584	1.95272e-11	down	hypothetical protein OsI_07860 [Oryza sativa Indica Group]
BGIOSGA016238	0	0	0	55	49	42	0.00285195	1.9824e-11	down	OSJNBb0089B03.11 [Oryza sativa Japonica Group]
EPlOING00000002441	0	0	0	53	39	52	0.00292437	2.01246e-11	down	.
BGIOSGA010819	2794	2620	3215	4358	3905	5160	0.488022	2.07922e-11	down	hypothetical protein OsI_11393 [Oryza sativa Indica Group]
BGIOSGA019492	717	572	167	3990	2241	4724	0.106854	2.10414e-11	down	hypothetical protein OsI_19195 [Oryza sativa Indica Group]
BGIOSGA018629	216	166	91	0	0	2	185.592	2.1391e-11	up	hypothetical protein OsI_18816 [Oryza sativa Indica Group]
BGIOSGA027107	547	634	842	173	143	224	2.83721	2.14764e-11	up	hypothetical protein OsI_28951 [Oryza sativa Indica Group]
BGIOSGA037617	169	206	91	2	0	0	182.232	2.16064e-11	up	hypothetical protein OsI_38775 [Oryza sativa Indica Group]
BGIOSGA004661	623	821	1899	118	133	188	5.59316	2.19074e-11	up	RecName: Full=Calmodulin-like protein 1; AltName: Full=OsCaM61; Flags: Precursor
BGIOSGA011675	1	0	0	49	92	179	0.00257588	2.29761e-11	down	RecName: Full=Cyclin-dependent protein kinase inhibitor EL2
BGIOSGA025494	99	60	98	215	233	379	0.236406	2.37851e-11	down	hypothetical protein OsI_25594 [Oryza sativa Indica Group]
BGIOSGA002596	2935	4085	4062	1228	914	1159	2.5554	2.42082e-11	up	hypothetical protein OsI_00040 [Oryza sativa Indica Group]
BGIOSGA028241	0	0	0	61	35	50	0.00289523	2.43466e-11	down	hypothetical protein OsI_28338 [Oryza sativa Indica Group]
BGIOSGA030664	75	132	128	13	2	5	12.8466	2.51769e-11	up	hypothetical protein OsI_31177 [Oryza sativa Indica Group]
BGIOSGA026185	518	628	2048	118	55	111	8.27823	2.63862e-11	up	hypothetical protein OsI_26949 [Oryza sativa Indica Group]
BGIOSGA030654	1348	1344	1251	2348	2094	2655	0.425191	2.69945e-11	down	hypothetical protein OsI_31151 [Oryza sativa Indica Group]
BGIOSGA019291	188	163	291	6	11	33	9.76213	2.77829e-11	up	hypothetical protein OsI_18718 [Oryza sativa Indica Group]
BGIOSGA027060	69	204	296	11	8	17	11.8305	2.78774e-11	up	hypothetical protein OsI_29039 [Oryza sativa Indica Group]
BGIOSGA036994	8	8	17	62	80	62	0.119228	2.79046e-11	down	hypothetical protein OsI_37471 [Oryza sativa Indica Group]
EPlOING00000002608	67	60	117	0	0	0	328.431	2.82848e-11	up	.
BGIOSGA017909	80	105	352	3	2	12	23.3861	2.85408e-11	up	hypothetical protein OsI_20242 [Oryza sativa Indica Group]
BGIOSGA011585	127	51	189	9	3	3	18.1706	2.90991e-11	up	PREDICTED: probable receptor-like protein kinase At1g33260 [Oryza sativa Japonica Group]
BGIOSGA018441	45	84	159	0	0	0	383.191	2.94801e-11	up	hypothetical protein OsI_19156 [Oryza sativa Indica Group]
BGIOSGA025299	707	370	623	1322	1468	1939	0.272317	2.95388e-11	down	hypothetical protein OsI_25186 [Oryza sativa Indica Group]
BGIOSGA026277	80	86	103	12	8	5	8.11033	3.15581e-11	up	hypothetical protein OsI_27124 [Oryza sativa Indica Group]
BGIOSGA024925	6	6	3	46	52	48	0.0780052	3.19989e-11	down	PREDICTED: disease resistance protein RGA2-like isoform X1 [Oryza sativa Japonica Group]
BGIOSGA013173	145	116	152	287	317	305	0.341562	3.28169e-11	down	PREDICTED: uncharacterized protein LOC4333506 [Oryza sativa Japonica Group]
BGIOSGA036946	59	72	98	0	0	0	310.91	3.36326e-11	up	hypothetical protein OsI_37374 [Oryza sativa Indica Group]
BGIOSGA020283	59	110	433	2	2	9	33.766	3.44259e-11	up	hypothetical protein OsI_20815 [Oryza sativa Indica Group]
BGIOSGA029686	1344	1726	2381	473	314	550	3.09282	3.48332e-11	up	hypothetical protein OsI_31526 [Oryza sativa Indica Group]
BGIOSGA015903	77	132	115	8	5	15	8.91161	3.48942e-11	up	PREDICTED: UDP-glycosyltransferase 74F2 [Oryza sativa Japonica Group]
BGIOSGA019150	515	711	559	149	77	74	4.56471	3.51958e-11	up	hypothetical protein OsI_18376 [Oryza sativa Indica Group]
BGIOSGA030065	58	57	180	0	0	0	388.383	3.56719e-11	up	hypothetical protein OsI_30727 [Oryza sativa Indica Group]
BGIOSGA024225	597	562	649	1020	1047	1533	0.382669	3.76895e-11	down	hypothetical protein OsI_26194 [Oryza sativa Indica Group]
BGIOSGA016356	168	218	202	382	457	499	0.332533	4.08515e-11	down	H0717B12.8 [Oryza sativa Indica Group]
BGIOSGA008967	438	384	481	721	667	888	0.43471	4.12313e-11	down	hypothetical protein OsI_08777 [Oryza sativa Indica Group]
BGIOSGA012097	296	241	381	81	49	77	3.3623	4.21131e-11	up	hypothetical protein OsI_10495 [Oryza sativa Indica Group]
BGIOSGA020318	68	43	234	0	0	0	448.49	4.2618e-11	up	PREDICTED: non-specific lipid-transfer protein 2 [Oryza sativa Japonica Group]
BGIOSGA018957	989	993	1167	1635	1577	1716	0.482483	4.29715e-11	down	hypothetical protein OsI_18143 [Oryza sativa Indica Group]
BGIOSGA036726	54	67	87	4	1	2	22.4673	4.41756e-11	up	hypothetical protein OsI_37298 [Oryza sativa Indica Group]
BGIOSGA017395	879	398	717	100	109	134	4.40062	4.46565e-11	up	hypothetical protein OsI_18024 [Oryza sativa Indica Group]
BGIOSGA033322	1183	1431	1765	511	395	445	2.44394	4.65074e-11	up	PREDICTED: probable glutathione S-transferase GSTU6 [Oryza sativa Japonica Group]
BGIOSGA013949	174	83	341	9	7	21	12.0443	4.68297e-11	up	hypothetical protein OsI_14340 [Oryza sativa Indica Group]
BGIOSGA033447	52	124	104	308	365	862	0.140806	4.72746e-11	down	PREDICTED: ethylene-responsive transcription factor 5 [Oryza sativa Japonica Group]
BGIOSGA023888	56	91	187	8	4	6	13.72	4.75355e-11	up	PREDICTED: uncharacterized hydrolase YugF [Oryza sativa Japonica Group]
BGIOSGA036715	478	363	619	102	121	108	3.28064	4.80852e-11	up	PREDICTED: bifunctional aspartokinase/homoserine dehydrogenase 1 isoform X2 [Oryza sativa Japonica Group]
BGIOSGA011628	878	900	1772	268	182	289	3.59524	4.81128e-11	up	PREDICTED: hexose carrier protein HEX6 [Oryza sativa Japonica Group]
BGIOSGA023722	70	82	66	0	0	0	301.659	4.84926e-11	up	hypothetical protein OsI_27318 [Oryza sativa Indica Group]
BGIOSGA004644	133	73	220	13	12	6	10.047	5.16447e-11	up	hypothetical protein OsI_04129 [Oryza sativa Indica Group]
BGIOSGA023696	410	381	545	116	102	150	2.74641	5.17378e-11	up	hypothetical protein OsI_27377 [Oryza sativa Indica Group]
BGIOSGA010104	150	109	297	18	15	27	6.88836	5.18654e-11	up	PREDICTED: alpha-amylase/trypsin inhibitor [Oryza sativa Japonica Group]
BGIOSGA002503	226	89	140	18	10	10	9.16267	5.25551e-11	up	PREDICTED: uncharacterized protein LOC4326083 isoform X2 [Oryza sativa Japonica Group]
BGIOSGA030543	70	52	101	5	4	3	13.8664	5.38749e-11	up	PREDICTED: delta(8)-fatty-acid desaturase 2 [Oryza sativa Japonica Group]
BGIOSGA017468	223	97	126	9	9	19	9.33532	5.44391e-11	up	PREDICTED: TPR repeat-containing thioredoxin TTL1 [Oryza sativa Japonica Group]
BGIOSGA015154	157	33	147	2	3	2	35.7486	5.63884e-11	up	H0502B11.6 [Oryza sativa Indica Group]
BGIOSGA019983	55	60	122	0	0	0	317.258	5.77217e-11	up	hypothetical protein OsI_20216 [Oryza sativa Indica Group]
BGIOSGA019131	357	98	135	15	3	10	16.6365	5.82765e-11	up	hypothetical protein OsI_18348 [Oryza sativa Indica Group]
BGIOSGA010647	333	308	251	625	758	826	0.308298	5.87979e-11	down	hypothetical protein [Oryza sativa Japonica Group]
EPlOING00000000045	0	0	0	57	25	65	0.00291543	5.90851e-11	down	.
BGIOSGA033182	982	581	1607	148	108	225	4.95122	5.98507e-11	up	hypothetical protein OsI_34134 [Oryza sativa Indica Group]
BGIOSGA028242	0	0	0	83	33	37	0.002764	6.0205e-11	down	hypothetical protein OsI_28341 [Oryza sativa Indica Group]
BGIOSGA027315	75	114	130	314	245	250	0.296748	6.07125e-11	down	hypothetical protein OsI_28538 [Oryza sativa Indica Group]
BGIOSGA015368	39	19	38	105	113	133	0.205947	6.15032e-11	down	PREDICTED: preprotein translocase subunit SECE1 [Setaria italica]
BGIOSGA006276	543	651	1017	177	158	207	3.05285	6.27693e-11	up	hypothetical protein OsI_07615 [Oryza sativa Indica Group]
BGIOSGA006207	2525	1836	1750	4360	4628	5361	0.326002	6.29732e-11	down	hypothetical protein OsI_07754 [Oryza sativa Indica Group]
BGIOSGA015590	8	9	7	75	51	45	0.106702	6.48998e-11	down	hypothetical protein OsI_14859 [Oryza sativa Indica Group]
BGIOSGA013933	2024	1640	1192	384	289	266	3.98296	6.72664e-11	up	PREDICTED: uncharacterized protein LOC4334769 isoform X3 [Oryza sativa Japonica Group]
BGIOSGA035745	368	304	396	673	603	628	0.42337	6.75415e-11	down	hypothetical protein OsI_37092 [Oryza sativa Indica Group]
BGIOSGA012596	4043	3371	3793	7587	6747	6362	0.409862	6.89715e-11	down	hypothetical protein OsI_11504 [Oryza sativa Indica Group]
EPlOING00000041236	0	2	0	102	47	78	0.00679792	6.93959e-11	down	.
EPlOING00000047287	126	85	182	1	0	0	272.106	6.96016e-11	up	.
BGIOSGA020487	1652	1985	3999	488	407	589	3.82047	7.26177e-11	up	PREDICTED: uncharacterized protein LOC4339814 [Oryza sativa Japonica Group]
BGIOSGA022878	692	140	125	17	11	10	19.7538	7.33945e-11	up	hypothetical protein OsI_22891 [Oryza sativa Indica Group]
BGIOSGA002377	1068	1270	1085	275	251	391	2.87208	7.4534e-11	up	PREDICTED: histone H2B.8 [Oryza sativa Japonica Group]
BGIOSGA019723	3087	2933	1972	7339	6454	6867	0.298243	7.45491e-11	down	hypothetical protein OsI_19671 [Oryza sativa Indica Group]
BGIOSGA022930	726	859	1515	267	169	203	3.61881	7.51533e-11	up	hypothetical protein OsI_23019 [Oryza sativa Indica Group]
BGIOSGA005678	704	400	823	112	120	155	3.73464	7.57133e-11	up	hypothetical protein OsI_08813 [Oryza sativa Indica Group]
BGIOSGA030568	33	37	54	130	93	154	0.249593	7.65149e-11	down	hypothetical protein OsI_30998 [Oryza sativa Indica Group]
BGIOSGA030525	0	0	0	58	49	30	0.00302224	7.76412e-11	down	hypothetical protein OsI_30913 [Oryza sativa Indica Group]
BGIOSGA004994	387	375	864	28	41	96	7.37503	7.94808e-11	up	hypothetical protein OsI_04813 [Oryza sativa Indica Group]
BGIOSGA033565	1138	929	1125	1927	1501	1949	0.452482	7.985e-11	down	PREDICTED: uncharacterized protein LOC4351128 [Oryza sativa Japonica Group]
BGIOSGA034870	599	606	899	192	169	241	2.63468	8.29672e-11	up	hypothetical protein OsI_35238 [Oryza sativa Indica Group]
BGIOSGA005604	537	616	976	138	68	175	4.26218	8.45563e-11	up	hypothetical protein OsI_08976 [Oryza sativa Indica Group]
BGIOSGA028192	0	0	0	39	34	54	0.00332426	8.57923e-11	down	hypothetical protein OsI_28240 [Oryza sativa Indica Group]
BGIOSGA011816	38	21	23	88	134	161	0.163027	8.63729e-11	down	hypothetical protein OsI_09938 [Oryza sativa Indica Group]
BGIOSGA014321	106	146	159	344	237	337	0.340783	9.23183e-11	down	hypothetical protein OsI_17475 [Oryza sativa Indica Group]
BGIOSGA013752	122	177	326	21	10	32	7.48604	9.51e-11	up	.
BGIOSGA027030	130	97	67	290	320	382	0.228603	9.64183e-11	down	hypothetical protein OsI_29117 [Oryza sativa Indica Group]
BGIOSGA027427	65	63	69	0	0	0	270.544	1.01052e-10	up	PREDICTED: BTB/POZ and MATH domain-containing protein 1 [Oryza sativa Japonica Group]
BGIOSGA009916	323	382	427	118	88	89	2.90135	1.01776e-10	up	hypothetical protein OsI_13294 [Oryza sativa Indica Group]
BGIOSGA015619	3124	1896	2210	5667	5794	5922	0.316343	1.03504e-10	down	beta-cyanoalanine synthase [Oryza sativa Indica Group]
BGIOSGA011711	0	0	0	40	30	57	0.00334173	1.11101e-10	down	Os02g0585608 [Oryza sativa Japonica Group]
BGIOSGA034373	0	0	0	60	33	36	0.00326274	1.12943e-10	down	hypothetical protein OsI_35394 [Oryza sativa Indica Group]
BGIOSGA037861	155	138	537	22	7	24	11.5904	1.13674e-10	up	hypothetical protein OsI_39251 [Oryza sativa Indica Group]
BGIOSGA005570	1906	2002	2684	541	482	822	2.71546	1.14677e-10	up	hypothetical protein OsI_09033 [Oryza sativa Indica Group]
BGIOSGA036658	68	63	64	0	0	0	268.665	1.17822e-10	up	hypothetical protein OsI_37424 [Oryza sativa Indica Group]
BGIOSGA031319	452	698	615	1902	1036	1525	0.304035	1.18046e-10	down	hypothetical protein OsI_32492 [Oryza sativa Indica Group]
BGIOSGA034635	45	73	91	0	0	0	283.514	1.22723e-10	up	PREDICTED: vegetative cell wall protein gp1 [Oryza sativa Japonica Group]
BGIOSGA002486	0	0	0	35	35	53	0.00342509	1.23502e-10	down	hypothetical protein OsI_00191 [Oryza sativa Indica Group]
BGIOSGA034307	0	0	0	56	23	57	0.00314894	1.23588e-10	down	Leucine Rich Repeat family protein, expressed [Oryza sativa Japonica Group]
BGIOSGA029369	450	673	902	120	109	186	3.68468	1.24744e-10	up	PREDICTED: uncharacterized protein LOC4347696 [Oryza sativa Japonica Group]
BGIOSGA008721	3662	2888	2783	7393	6982	6178	0.345114	1.24907e-10	down	hypothetical protein OsI_08286 [Oryza sativa Indica Group]
BGIOSGA025312	0	0	0	43	31	47	0.00349029	1.25017e-10	down	hypothetical protein OsI_25209 [Oryza sativa Indica Group]
EPlOING00000000883	69	57	68	0	0	0	266.346	1.2541e-10	up	.
BGIOSGA034999	1	1	0	76	59	60	0.00778523	1.25492e-10	down	hypothetical protein OsI_35505 [Oryza sativa Indica Group]
BGIOSGA025331	149	205	559	36	12	24	9.37856	1.26993e-10	up	hypothetical protein OsI_25240 [Oryza sativa Indica Group]
BGIOSGA015225	198	296	342	52	52	70	3.6261	1.30335e-10	up	hypothetical protein OsI_15583 [Oryza sativa Indica Group]
BGIOSGA023597	190	253	439	27	35	59	5.44004	1.31843e-10	up	hypothetical protein OsI_24444 [Oryza sativa Indica Group]
BGIOSGA028542	1	0	1	51	72	78	0.00746972	1.36786e-10	down	hypothetical protein OsI_28979 [Oryza sativa Indica Group]
BGIOSGA028054	386	558	613	150	81	115	3.42678	1.3848e-10	up	hypothetical protein OsI_27950 [Oryza sativa Indica Group]
BGIOSGA015653	75	63	177	4	6	9	12.1957	1.40337e-10	up	hypothetical protein OsI_14727 [Oryza sativa Indica Group]
BGIOSGA029874	100	52	139	7	3	9	11.5421	1.43109e-10	up	hypothetical protein OsI_31140 [Oryza sativa Indica Group]
BGIOSGA005131	80	81	81	239	273	182	0.261024	1.43744e-10	down	hypothetical protein OsI_05121 [Oryza sativa Indica Group]
BGIOSGA014205	207	187	228	359	372	416	0.409667	1.47582e-10	down	hypothetical protein OsI_17707 [Oryza sativa Indica Group]
BGIOSGA025032	89	59	128	7	4	11	9.46711	1.5031e-10	up	hypothetical protein OsI_24644 [Oryza sativa Indica Group]
BGIOSGA005278	1035	755	1667	157	248	199	4.18071	1.54373e-10	up	hypothetical protein OsI_05418 [Oryza sativa Indica Group]
BGIOSGA002867	730	751	920	276	257	254	2.29622	1.55137e-10	up	hypothetical protein OsI_00591 [Oryza sativa Indica Group]
BGIOSGA037176	1795	1714	1465	3161	2877	3813	0.38824	1.57085e-10	down	hypothetical protein OsI_37858 [Oryza sativa Indica Group]
BGIOSGA004030	21	38	29	177	120	92	0.171471	1.59871e-10	down	hypothetical protein OsI_02937 [Oryza sativa Indica Group]
BGIOSGA023892	110	83	307	7	7	17	11.8794	1.60182e-10	up	hypothetical protein OsI_26909 [Oryza sativa Indica Group]
BGIOSGA021521	2345	2316	2358	3635	3744	4665	0.443779	1.61743e-10	down	hypothetical protein OsI_22402 [Oryza sativa Indica Group]
BGIOSGA031063	751	834	1179	282	243	320	2.46242	1.61908e-10	up	hypothetical protein OsI_31986 [Oryza sativa Indica Group]
BGIOSGA017692	315	263	396	40	59	85	3.98905	1.6467e-10	up	PREDICTED: respiratory burst oxidase homolog protein A [Oryza sativa Japonica Group]
BGIOSGA023181	635	399	1794	62	37	125	9.39255	1.72227e-10	up	hypothetical protein OsI_23553 [Oryza sativa Indica Group]
BGIOSGA036710	133	162	116	691	472	316	0.211768	1.73654e-10	down	hypothetical protein OsI_37322 [Oryza sativa Indica Group]
BGIOSGA013327	153	109	546	15	17	20	11.1515	1.7503e-10	up	hypothetical protein OsI_13021 [Oryza sativa Indica Group]
BGIOSGA029226	272	289	339	749	437	868	0.337035	1.7729e-10	down	hypothetical protein OsI_32491 [Oryza sativa Indica Group]
BGIOSGA036062	381	388	408	128	106	113	2.57578	1.77408e-10	up	hypothetical protein OsI_38592 [Oryza sativa Indica Group]
BGIOSGA021438	216	99	138	21	15	14	6.91512	1.841e-10	up	hypothetical protein OsI_22558 [Oryza sativa Indica Group]
BGIOSGA012615	845	593	675	1366	1712	1746	0.331581	1.87542e-10	down	PREDICTED: inactive beta-amylase 9 [Oryza sativa Japonica Group]
BGIOSGA034343	632	680	386	86	105	109	4.36061	1.91536e-10	up	hypothetical protein OsI_35458 [Oryza sativa Indica Group]
BGIOSGA016208	95	93	139	0	1	0	227.957	1.92702e-10	up	hypothetical protein OsI_15537 [Oryza sativa Indica Group]
BGIOSGA012559	50	58	129	3	1	1	35.0276	1.94689e-10	up	hypothetical protein OsI_11426 [Oryza sativa Indica Group]
BGIOSGA003705	67	123	170	10	12	4	10.1495	1.94856e-10	up	PREDICTED: bidirectional sugar transporter SWEET2a [Oryza sativa Japonica Group]
BGIOSGA009636	5	6	2	72	25	92	0.0545998	1.94928e-10	down	hypothetical protein OsI_13907 [Oryza sativa Indica Group]
BGIOSGA024010	2	2	0	52	39	39	0.0235013	1.9651e-10	down	hypothetical protein OsI_26636 [Oryza sativa Indica Group]
EPlOING00000026197	0	2	0	146	47	55	0.00623487	2.02512e-10	down	.
BGIOSGA002649	52	61	72	0	0	0	252.66	2.03032e-10	up	hypothetical protein OsI_00141 [Oryza sativa Indica Group]
BGIOSGA008934	75	43	78	0	0	0	267.015	2.03778e-10	up	Rac GDP-dissociation inhibitor 1 [Oryza sativa Japonica Group]
BGIOSGA005429	193	52	43	0	0	0	407.538	2.05737e-10	up	RecName: Full=Uncharacterized protein OsI_009113; AltName: Full=Unknown protein AN04 from 2D-PAGE of anther
BGIOSGA029709	24	42	35	102	100	139	0.225765	2.11401e-10	down	hypothetical protein OsI_31476 [Oryza sativa Indica Group]
BGIOSGA023921	4	22	16	116	63	203	0.0856415	2.12252e-10	down	hypothetical protein OsI_26811 [Oryza sativa Indica Group]
BGIOSGA011666	227	100	496	1323	1018	1619	0.152681	2.13577e-10	down	hypothetical protein OsI_09638 [Oryza sativa Indica Group]
BGIOSGA016838	594	849	1197	238	180	187	3.25883	2.14103e-10	up	OSJNBa0091D06.12 [Oryza sativa Japonica Group]
BGIOSGA028315	0	1	0	47	67	91	0.00398084	2.19321e-10	down	hypothetical protein OsI_28479 [Oryza sativa Indica Group]
BGIOSGA004029	543	493	326	1228	1713	1325	0.242692	2.25412e-10	down	hypothetical protein OsI_02933 [Oryza sativa Indica Group]
BGIOSGA009342	77	79	87	7	10	10	6.80586	2.29972e-10	up	hypothetical protein OsI_09545 [Oryza sativa Indica Group]
BGIOSGA006011	247	420	526	75	53	95	4.05253	2.34955e-10	up	hypothetical protein OsI_08128 [Oryza sativa Indica Group]
BGIOSGA034762	1580	1214	1291	2731	2583	2606	0.392055	2.35461e-10	down	hypothetical protein OsI_35044 [Oryza sativa Indica Group]
BGIOSGA023856	228	91	184	24	7	13	8.77203	2.38387e-10	up	hypothetical protein OsI_26994 [Oryza sativa Indica Group]
BGIOSGA020375	1500	1274	2465	501	401	426	2.93402	2.38671e-10	up	PREDICTED: aspartic proteinase oryzasin-1 [Oryza sativa Japonica Group]
BGIOSGA016813	273	140	193	13	18	37	6.86464	2.42587e-10	up	PREDICTED: elicitor-responsive protein 3 [Oryza sativa Japonica Group]
BGIOSGA020317	858	543	4022	34	18	47	39.7742	2.43096e-10	up	PREDICTED: non-specific lipid-transfer protein 2 [Oryza sativa Japonica Group]
BGIOSGA036777	165	162	166	319	263	357	0.401083	2.48337e-10	down	hypothetical protein OsI_37197 [Oryza sativa Indica Group]
BGIOSGA028407	0	0	0	27	46	46	0.00348514	2.52303e-10	down	hypothetical protein OsI_28687 [Oryza sativa Indica Group]
BGIOSGA018466	176	144	194	39	19	16	5.26093	2.56219e-10	up	hypothetical protein OsI_19112 [Oryza sativa Indica Group]
BGIOSGA028861	1440	1586	1251	2842	2537	3953	0.354246	2.61446e-10	down	PREDICTED: protein DETOXIFICATION 27 isoform X2 [Oryza sativa Japonica Group]
BGIOSGA030429	70	83	70	251	213	166	0.267961	2.61522e-10	down	hypothetical protein OsI_30690 [Oryza sativa Indica Group]
BGIOSGA034423	267	273	264	77	49	74	3.08639	2.62882e-10	up	hypothetical protein OsI_35274 [Oryza sativa Indica Group]
BGIOSGA027473	0	0	0	31	36	46	0.00370793	2.65062e-10	down	hypothetical protein OsI_28205 [Oryza sativa Indica Group]
BGIOSGA030948	130	54	243	2	0	0	157.037	2.68552e-10	up	hypothetical protein OsI_31732 [Oryza sativa Indica Group]
BGIOSGA026080	54	71	64	184	186	148	0.274697	2.71472e-10	down	hypothetical protein OsI_26756 [Oryza sativa Indica Group]
BGIOSGA013857	322	401	587	109	86	124	3.0893	2.756e-10	up	hypothetical protein OsI_14154 [Oryza sativa Indica Group]
EPlOING00000005896	167	116	71	1	0	1	138.403	2.83005e-10	up	Os08g0366000, partial [Oryza sativa Japonica Group]
BGIOSGA027043	99	102	113	1	3	14	13.4918	2.98011e-10	up	hypothetical protein OsI_29082 [Oryza sativa Indica Group]
BGIOSGA005142	291	297	730	52	14	62	7.80036	3.09832e-10	up	PREDICTED: glucan endo-1,3-beta-glucosidase, acidic isoform [Oryza sativa Japonica Group]
BGIOSGA022054	68	59	33	166	225	239	0.195268	3.13214e-10	down	PREDICTED: uncharacterized protein LOC4339930 [Oryza sativa Japonica Group]
BGIOSGA017731	155	171	191	46	31	36	3.47369	3.20051e-10	up	hypothetical protein OsI_20609 [Oryza sativa Indica Group]
BGIOSGA035427	1119	1353	1054	2353	2351	2407	0.378144	3.20233e-10	down	PREDICTED: uncharacterized protein LOC9272501 [Oryza sativa Japonica Group]
BGIOSGA031435	131	59	107	276	366	327	0.22938	3.22717e-10	down	predicted protein [Hordeum vulgare subsp. vulgare]
BGIOSGA002838	1	0	0	77	38	85	0.00415905	3.24045e-10	down	hypothetical protein OsI_00507 [Oryza sativa Indica Group]
BGIOSGA004052	571	454	487	1012	773	1102	0.402041	3.24931e-10	down	PREDICTED: glucose-1-phosphate adenylyltransferase large subunit 1, chloroplastic/amyloplastic [Oryza sativa Japonica Group]
BGIOSGA015125	303	213	630	42	40	71	5.55338	3.32095e-10	up	PREDICTED: protein YLS9 [Oryza sativa Japonica Group]
BGIOSGA006537	1504	1265	553	130	150	72	7.21496	3.39629e-10	up	hypothetical protein OsI_07085 [Oryza sativa Indica Group]
BGIOSGA002748	44	98	178	0	0	3	79.5121	3.40617e-10	up	hypothetical protein OsI_00328 [Oryza sativa Indica Group]
BGIOSGA013856	402	447	543	139	110	168	2.53719	3.44076e-10	up	hypothetical protein OsI_14153 [Oryza sativa Indica Group]
BGIOSGA016165	228	173	339	39	38	61	4.02668	3.44805e-10	up	hypothetical protein OsI_15441 [Oryza sativa Indica Group]
BGIOSGA005224	102	86	205	3	6	17	11.3211	3.44926e-10	up	unknown protein [Oryza sativa Japonica Group]
BGIOSGA004908	138	71	186	12	10	19	7.23457	3.49774e-10	up	PREDICTED: dnaJ protein homolog 1 [Oryza sativa Japonica Group]
BGIOSGA028819	63	95	225	0	1	1	139.815	3.50416e-10	up	hypothetical protein OsI_29532 [Oryza sativa Indica Group]
BGIOSGA016605	0	0	0	31	39	39	0.00381746	3.52298e-10	down	hypothetical protein OsI_16311 [Oryza sativa Indica Group]
EPlOING00000034707	15	31	11	116	113	90	0.136933	3.57969e-10	down	.
BGIOSGA026372	491	503	711	74	73	168	4.13373	3.63905e-10	up	hypothetical protein OsI_27297 [Oryza sativa Indica Group]
BGIOSGA020640	78	64	85	190	138	181	0.338956	3.76553e-10	down	hypothetical protein OsI_24255 [Oryza sativa Indica Group]
BGIOSGA014548	483	579	1197	164	105	140	4.09933	3.78925e-10	up	hypothetical protein OsI_16982 [Oryza sativa Indica Group]
BGIOSGA016849	109	94	97	16	10	17	5.35444	3.89203e-10	up	OSJNBa0011L07.11 [Oryza sativa Japonica Group]
BGIOSGA033482	114	188	606	16	15	30	10.8486	3.97334e-10	up	hypothetical protein OsI_34732 [Oryza sativa Indica Group]
BGIOSGA002646	69	42	68	0	0	0	244.554	4.00962e-10	up	hypothetical protein OsI_00131 [Oryza sativa Indica Group]
BGIOSGA015073	0	0	0	34	39	34	0.00388036	4.03925e-10	down	hypothetical protein OsI_15957 [Oryza sativa Indica Group]
BGIOSGA024764	357	373	794	101	85	107	3.85077	4.06737e-10	up	putative aldehyde oxidase [Oryza sativa Japonica Group]
BGIOSGA035689	227	227	340	62	31	68	3.75753	4.12783e-10	up	PREDICTED: ATP-dependent DNA helicase Q-like 1 [Oryza sativa Japonica Group]
BGIOSGA005394	29	10	9	86	105	120	0.118736	4.16625e-10	down	hypothetical protein OsI_09365 [Oryza sativa Indica Group]
BGIOSGA007656	1372	966	2340	202	230	391	4.24246	4.22724e-10	up	hypothetical protein OsI_06077 [Oryza sativa Indica Group]
BGIOSGA001873	1713	1123	791	4551	4156	3484	0.228821	4.23076e-10	down	PREDICTED: CSC1-like protein RXW8 [Oryza sativa Japonica Group]
BGIOSGA030235	574	553	664	202	158	233	2.30089	4.23402e-10	up	hypothetical protein OsI_30382 [Oryza sativa Indica Group]
BGIOSGA026081	113	111	272	12	15	25	7.05344	4.37039e-10	up	hypothetical protein OsI_26758 [Oryza sativa Indica Group]
BGIOSGA002802	140	58	141	9	10	12	8.20759	4.45491e-10	up	hypothetical protein OsI_00430 [Oryza sativa Indica Group]
BGIOSGA036999	372	260	333	624	709	687	0.360104	4.47003e-10	down	RecName: Full=Sialyltransferase-like protein 2
BGIOSGA012485	1387	1298	930	2575	3563	3546	0.285101	4.49303e-10	down	PREDICTED: squidulin [Oryza sativa Japonica Group]
BGIOSGA014294	122	79	126	18	8	16	5.93979	4.51613e-10	up	PREDICTED: kinesin-5 isoform X2 [Oryza sativa Japonica Group]
BGIOSGA031227	610	367	745	65	99	135	4.31033	4.65886e-10	up	hypothetical protein OsI_32309 [Oryza sativa Indica Group]
BGIOSGA034505	84	87	111	1	0	1	106.822	4.68426e-10	up	hypothetical protein OsI_35095 [Oryza sativa Indica Group]
BGIOSGA029292	403	380	332	726	721	765	0.384514	4.72189e-10	down	hypothetical protein OsI_32343 [Oryza sativa Indica Group]
BGIOSGA014719	112	72	80	240	265	647	0.178564	4.76719e-10	down	hypothetical protein OsI_16631 [Oryza sativa Indica Group]
BGIOSGA017804	2531	3561	10610	677	526	806	6.06754	4.79876e-10	up	hypothetical protein OsI_20451 [Oryza sativa Indica Group]
BGIOSGA036691	43	58	72	0	0	0	235.348	4.83409e-10	up	hypothetical protein OsI_37358 [Oryza sativa Indica Group]
BGIOSGA037534	82	81	126	1	0	1	108.78	4.84184e-10	up	hypothetical protein OsI_38623 [Oryza sativa Indica Group]
BGIOSGA004342	13	9	2	107	75	53	0.0790247	4.94992e-10	down	RecName: Full=Potassium channel KAT6
BGIOSGA015216	2031	2212	1107	5972	5162	5468	0.250173	4.96285e-10	down	hypothetical protein OsI_15607 [Oryza sativa Indica Group]
BGIOSGA034450	0	0	0	42	22	48	0.00380829	4.99448e-10	down	hypothetical protein OsI_35220 [Oryza sativa Indica Group]
BGIOSGA030559	1991	2165	1745	3708	3414	4020	0.40594	4.99714e-10	down	hypothetical protein OsI_30977 [Oryza sativa Indica Group]
BGIOSGA006405	168	313	642	17	11	52	10.616	5.01113e-10	up	Os02g0508100, partial [Oryza sativa Japonica Group]
BGIOSGA000319	273	223	668	44	56	51	5.58834	5.01945e-10	up	hypothetical protein OsI_04800 [Oryza sativa Indica Group]
BGIOSGA033980	256	416	615	88	70	90	3.87624	5.0465e-10	up	hypothetical protein OsI_36134 [Oryza sativa Indica Group]
BGIOSGA036657	61	42	69	0	0	0	234.285	5.1227e-10	up	PREDICTED: transcription initiation factor IIE subunit alpha isoform X1 [Oryza sativa Japonica Group]
BGIOSGA000521	433	381	485	55	107	88	3.86743	5.23757e-10	up	hypothetical protein OsI_04368 [Oryza sativa Indica Group]
BGIOSGA002489	872	844	895	1852	1650	1412	0.401074	5.27303e-10	down	PREDICTED: ABC transporter G family member 7 [Oryza sativa Japonica Group]
BGIOSGA036836	750	811	1076	1728	1209	2119	0.397508	5.3307e-10	down	hypothetical protein OsI_37115 [Oryza sativa Indica Group]
BGIOSGA023234	2409	2382	7103	275	361	724	6.45043	5.78218e-10	up	PREDICTED: uncharacterized protein LOC4341478 [Oryza sativa Japonica Group]
BGIOSGA028246	1374	1151	2035	256	254	484	3.47051	5.8181e-10	up	hypothetical protein OsI_28350 [Oryza sativa Indica Group]
BGIOSGA011880	197	145	504	21	15	42	8.06438	5.94374e-10	up	hypothetical protein OsI_10063 [Oryza sativa Indica Group]
BGIOSGA014984	213	193	264	15	23	52	5.68432	5.96734e-10	up	hypothetical protein OsI_16121 [Oryza sativa Indica Group]
BGIOSGA025117	39	47	114	0	0	0	265.315	6.12987e-10	up	hypothetical protein OsI_24822 [Oryza sativa Indica Group]
BGIOSGA003951	92	87	47	3	1	0	43.8629	6.15748e-10	up	RecName: Full=Bidirectional sugar transporter SWEET6a; Short=OsSWEET6a
BGIOSGA014849	137	113	156	32	16	23	4.34956	6.20759e-10	up	OSJNBa0081L15.6 [Oryza sativa Japonica Group]
BGIOSGA031590	1000	573	2125	101	116	222	6.227	6.22206e-10	up	hypothetical protein OsI_34241 [Oryza sativa Indica Group]
BGIOSGA022244	84	84	178	8	15	10	7.65584	6.27045e-10	up	PREDICTED: protein EXORDIUM-like 3 [Oryza sativa Japonica Group]
BGIOSGA018721	0	0	0	46	28	31	0.00400437	6.36555e-10	down	hypothetical protein OsI_18638 [Oryza sativa Indica Group]
BGIOSGA026818	333	184	487	56	41	68	4.5592	6.52838e-10	up	hypothetical protein OsI_29584 [Oryza sativa Indica Group]
BGIOSGA000375	179	129	204	26	29	42	3.9889	6.54105e-10	up	hypothetical protein OsI_04689 [Oryza sativa Indica Group]
BGIOSGA026594	142	93	511	15	7	21	12.7138	6.5514e-10	up	hypothetical protein OsI_30006 [Oryza sativa Indica Group]
BGIOSGA001929	3694	2949	2285	8860	7691	6593	0.295407	6.61435e-10	down	hypothetical protein OsI_01310 [Oryza sativa Indica Group]
BGIOSGA018015	90	42	185	6	2	0	28.8954	6.62725e-10	up	hypothetical protein OsI_20048 [Oryza sativa Indica Group]
BGIOSGA037530	253	197	358	45	48	73	3.65816	6.66201e-10	up	hypothetical protein OsI_38616 [Oryza sativa Indica Group]
BGIOSGA022035	42	59	65	0	0	0	226.689	6.69929e-10	up	hypothetical protein OsI_21429 [Oryza sativa Indica Group]
BGIOSGA009521	159	99	121	353	304	286	0.304945	6.72491e-10	down	hypothetical protein OsI_14165 [Oryza sativa Indica Group]
BGIOSGA027902	28	15	17	86	68	88	0.18995	6.78323e-10	down	hypothetical protein OsI_27632 [Oryza sativa Indica Group]
BGIOSGA030564	38	46	120	0	0	0	269.772	6.80757e-10	up	hypothetical protein OsI_30983 [Oryza sativa Indica Group]
BGIOSGA036763	2971	2174	1662	435	479	309	4.22699	6.86111e-10	up	hypothetical protein OsI_37230 [Oryza sativa Indica Group]
BGIOSGA005334	464	413	370	888	784	808	0.383921	6.90006e-10	down	PREDICTED: zinc finger protein ZAT5-like [Oryza sativa Japonica Group]
BGIOSGA004982	2635	3001	3874	1210	990	1233	2.09038	7.2041e-10	up	hypothetical protein OsI_04787 [Oryza sativa Indica Group]
BGIOSGA020050	1379	449	3553	93	100	193	10.1546	7.21325e-10	up	unknown protein [Oryza sativa Japonica Group]
BGIOSGA024616	301	224	294	548	438	516	0.413965	7.23216e-10	down	hypothetical protein OsI_25359 [Oryza sativa Indica Group]
BGIOSGA008503	222	287	301	635	438	512	0.388205	7.27282e-10	down	hypothetical protein OsI_07819 [Oryza sativa Indica Group]
BGIOSGA008736	44	113	178	8	3	8	13.2037	7.33989e-10	up	hypothetical protein OsI_08316 [Oryza sativa Indica Group]
BGIOSGA031703	2930	2722	2942	6668	5071	4624	0.398007	7.39429e-10	down	hypothetical protein OsI_34005 [Oryza sativa Indica Group]
BGIOSGA006333	52	38	86	0	0	0	236.515	7.4202e-10	up	hypothetical protein OsI_07498 [Oryza sativa Indica Group]
BGIOSGA017627	193	219	136	539	472	448	0.288447	7.52844e-10	down	hypothetical protein OsI_20866 [Oryza sativa Indica Group]
BGIOSGA002422	1192	972	1011	2101	1833	1875	0.415921	7.53118e-10	down	RecName: Full=Probable zinc metalloprotease EGY2, chloroplastic; AltName: Full=Protein ETHYLENE-DEPENDENT GRAVITROPISM-DEFICIENT AND YELLOW-GREEN 2; Flags: Precursor
BGIOSGA010505	75	36	203	2	4	3	25.0026	7.62843e-10	up	hypothetical protein OsI_12100 [Oryza sativa Indica Group]
BGIOSGA020335	180	50	67	4	4	1	25.1978	7.76634e-10	up	PREDICTED: cytochrome b561 and DOMON domain-containing protein At3g61750 [Oryza sativa Japonica Group]
BGIOSGA018039	1492	929	837	2717	3263	3133	0.273038	7.85113e-10	down	hypothetical protein OsI_19995 [Oryza sativa Indica Group]
BGIOSGA036939	50	49	59	0	0	0	216.238	8.14751e-10	up	hypothetical protein OsI_37357 [Oryza sativa Indica Group]
BGIOSGA000624	325	328	293	715	472	764	0.374645	8.18057e-10	down	bZIP transcription factor [Oryza sativa Japonica Group]
BGIOSGA004554	320	172	500	39	30	66	5.52022	8.30072e-10	up	hypothetical protein OsI_03949 [Oryza sativa Indica Group]
BGIOSGA009327	115	183	208	37	19	21	4.9687	8.35332e-10	up	hypothetical protein OsI_09516 [Oryza sativa Indica Group]
BGIOSGA029601	91	86	44	258	214	447	0.189711	8.39374e-10	down	hypothetical protein OsI_31724 [Oryza sativa Indica Group]
BGIOSGA021421	2466	2409	4169	631	707	396	3.80954	8.42201e-10	up	hypothetical protein OsI_22594 [Oryza sativa Indica Group]
BGIOSGA014911	656	655	1047	226	195	269	2.56756	8.46549e-10	up	hypothetical protein OsI_16261 [Oryza sativa Indica Group]
BGIOSGA004921	2363	884	1810	311	255	340	4.24574	8.56995e-10	up	hypothetical protein OsI_04661 [Oryza sativa Indica Group]
BGIOSGA027324	62	40	62	149	148	136	0.284458	8.66564e-10	down	hypothetical protein OsI_28520 [Oryza sativa Indica Group]
BGIOSGA027425	0	0	0	34	33	31	0.00425273	8.73483e-10	down	hypothetical protein OsI_28307 [Oryza sativa Indica Group]
BGIOSGA009499	1792	885	2187	386	233	335	3.83991	8.94146e-10	up	expressed protein [Oryza sativa Japonica Group]
BGIOSGA006001	4140	1961	4774	470	350	896	4.84344	9.10011e-10	up	hypothetical protein OsI_08143 [Oryza sativa Indica Group]
BGIOSGA036315	83	85	58	4	6	8	9.67506	9.12214e-10	up	hypothetical protein OsI_38092 [Oryza sativa Indica Group]
BGIOSGA000896	371	503	1518	95	66	110	6.4602	9.17605e-10	up	hypothetical protein OsI_03576 [Oryza sativa Indica Group]
BGIOSGA028285	1	2	2	27	35	61	0.0309725	9.23167e-10	down	hypothetical protein OsI_28428 [Oryza sativa Indica Group]
BGIOSGA002840	46	92	138	9	2	4	13.8113	9.24971e-10	up	hypothetical protein OsI_00510 [Oryza sativa Indica Group]
BGIOSGA008990	58	77	193	3	7	9	12.5924	9.32395e-10	up	hypothetical protein OsI_08818 [Oryza sativa Indica Group]
BGIOSGA015593	294	208	424	633	609	894	0.325234	9.48035e-10	down	hypothetical protein OsI_14853 [Oryza sativa Indica Group]
BGIOSGA035908	0	0	0	53	37	21	0.00373903	9.49409e-10	down	hypothetical protein OsI_38951 [Oryza sativa Indica Group]
BGIOSGA037008	141	107	69	339	316	339	0.246209	9.54022e-10	down	PREDICTED: uncharacterized protein LOC4351532 [Oryza sativa Japonica Group]
BGIOSGA014538	478	431	478	760	728	1079	0.412945	9.9033e-10	down	OSIGBa0158F05.8 [Oryza sativa Indica Group]
EPlOING00000032775	53	35	85	0	0	0	232.341	9.93086e-10	up	.
BGIOSGA021919	505	726	2876	94	70	161	9.21296	1.00106e-09	up	hypothetical protein OsI_21650 [Oryza sativa Indica Group]
BGIOSGA033341	193	288	151	583	527	785	0.259576	1.06553e-09	down	hypothetical protein OsI_34436 [Oryza sativa Indica Group]
BGIOSGA025466	827	378	432	72	84	106	4.80379	1.07416e-09	up	hypothetical protein OsI_25542 [Oryza sativa Indica Group]
BGIOSGA002584	1195	1029	1175	1793	2276	2367	0.398418	1.0753e-09	down	PREDICTED: thylakoid lumenal 17.9 kDa protein, chloroplastic isoform X2 [Oryza sativa Japonica Group]
BGIOSGA016092	2301	2068	2102	3961	3035	3713	0.462214	1.07675e-09	down	PREDICTED: probable LRR receptor-like serine/threonine-protein kinase At5g10290 [Oryza sativa Japonica Group]
BGIOSGA037873	14	10	5	71	79	49	0.110555	1.09228e-09	down	Sodium/hydrogen exchanger family protein, expressed [Oryza sativa Japonica Group]
BGIOSGA014427	448	389	531	90	103	156	2.97132	1.11244e-09	up	hypothetical protein OsI_17242 [Oryza sativa Indica Group]
BGIOSGA017276	5637	5404	4352	11190	12776	10395	0.339765	1.11818e-09	down	hypothetical protein OsI_17743 [Oryza sativa Indica Group]
BGIOSGA003879	237	204	267	401	426	439	0.420797	1.12321e-09	down	hypothetical protein OsI_02656 [Oryza sativa Indica Group]
BGIOSGA031523	652	393	809	78	110	156	4.03784	1.12323e-09	up	hypothetical protein OsI_34383 [Oryza sativa Indica Group]
BGIOSGA000213	483	244	323	75	56	67	4.0609	1.1247e-09	up	PREDICTED: probable glucuronosyltransferase Os01g0926600 [Oryza sativa Japonica Group]
BGIOSGA022620	109	121	589	17	16	16	11.8868	1.12898e-09	up	PREDICTED: pyruvate dehydrogenase E1 component subunit alpha-2, mitochondrial [Oryza sativa Japonica Group]
BGIOSGA037660	70	49	55	2	1	3	22.267	1.14487e-09	up	hypothetical protein OsI_38859 [Oryza sativa Indica Group]
BGIOSGA023704	105	122	139	286	328	861	0.191697	1.14565e-09	down	hypothetical protein OsI_27352 [Oryza sativa Indica Group]
EPlOING00000046382	66	24	125	0	0	0	284.116	1.14982e-09	up	.
BGIOSGA016673	1606	2490	1723	6291	4280	4186	0.302382	1.1845e-09	down	hypothetical protein OsI_16445 [Oryza sativa Indica Group]
BGIOSGA026707	137	80	136	11	18	7	7.24967	1.18986e-09	up	PREDICTED: beta-glucosidase 27 [Oryza sativa Japonica Group]
BGIOSGA014068	0	0	0	20	38	49	0.00390192	1.19536e-09	down	hypothetical protein OsI_17969 [Oryza sativa Indica Group]
BGIOSGA016746	524	568	777	997	1171	1588	0.374502	1.2797e-09	down	PREDICTED: uncharacterized protein LOC4336363 [Oryza sativa Japonica Group]
BGIOSGA021377	571	82	317	25	17	23	11.4136	1.31452e-09	up	PREDICTED: protein ASPARTIC PROTEASE IN GUARD CELL 1 [Oryza sativa Japonica Group]
BGIOSGA000614	267	334	644	84	69	86	3.86034	1.37411e-09	up	hypothetical protein OsI_04178 [Oryza sativa Indica Group]
BGIOSGA033256	1739	1473	1609	2968	2800	2632	0.434336	1.37783e-09	down	hypothetical protein OsI_34274 [Oryza sativa Indica Group]
BGIOSGA030652	611	584	564	957	1146	1263	0.396815	1.46648e-09	down	PREDICTED: RING-H2 finger protein ATL48 [Oryza sativa Japonica Group]
BGIOSGA011279	4640	3885	3315	8772	7095	8179	0.378626	1.48526e-09	down	hypothetical protein OsI_10383 [Oryza sativa Indica Group]
BGIOSGA037188	388	368	392	601	617	722	0.449307	1.56735e-09	down	hypothetical protein OsI_37888 [Oryza sativa Indica Group]
BGIOSGA036055	45	38	74	0	0	0	211.631	1.575e-09	up	hypothetical protein OsI_38611 [Oryza sativa Indica Group]
BGIOSGA025038	11	15	17	66	51	59	0.184859	1.57616e-09	down	hypothetical protein OsI_24658 [Oryza sativa Indica Group]
BGIOSGA005807	222	230	385	55	65	66	3.34215	1.59764e-09	up	hypothetical protein OsI_08541 [Oryza sativa Indica Group]
BGIOSGA002872	494	443	390	919	723	920	0.398224	1.61478e-09	down	hypothetical protein OsI_00599 [Oryza sativa Indica Group]
BGIOSGA011757	1092	1411	2349	313	221	471	3.64934	1.62087e-09	up	PREDICTED: probable serine/threonine-protein kinase At1g01540 [Oryza sativa Japonica Group]
BGIOSGA013103	328	203	332	575	527	647	0.372833	1.63196e-09	down	hypothetical protein OsI_12571 [Oryza sativa Indica Group]
BGIOSGA008784	1307	1055	1420	478	358	370	2.37025	1.63405e-09	up	hypothetical protein OsI_08421 [Oryza sativa Indica Group]
BGIOSGA037758	959	617	850	91	26	159	6.94207	1.64445e-09	up	hypothetical protein OsI_39039 [Oryza sativa Indica Group]
BGIOSGA013266	188	136	99	15	5	22	7.97532	1.65499e-09	up	hypothetical protein LOC_Os03g46300 [Oryza sativa Japonica Group]
BGIOSGA020314	232	185	584	50	34	50	5.49772	1.66285e-09	up	hypothetical protein OsI_20875 [Oryza sativa Indica Group]
BGIOSGA014480	153	135	247	36	35	32	3.85968	1.67034e-09	up	PREDICTED: probable protein phosphatase 2C 43 [Oryza sativa Japonica Group]
BGIOSGA014513	108	163	115	334	329	297	0.305627	1.74246e-09	down	H0404F02.5 [Oryza sativa Indica Group]
BGIOSGA008992	371	417	463	109	128	130	2.56763	1.75416e-09	up	hypothetical protein OsI_08824 [Oryza sativa Indica Group]
BGIOSGA027757	459	392	657	4	0	14	66.0588	1.77654e-09	up	hypothetical protein OsI_27592 [Oryza sativa Indica Group]
BGIOSGA010894	1694	1204	940	3392	3902	3245	0.277846	1.85938e-09	down	PREDICTED: acetate/butyrate--CoA ligase AAE7, peroxisomal [Oryza sativa Japonica Group]
BGIOSGA030408	83	69	73	11	4	3	9.5554	1.87615e-09	up	hypothetical protein OsI_30642 [Oryza sativa Indica Group]
BGIOSGA036504	4	3	6	48	26	46	0.0825732	1.91049e-09	down	hypothetical protein OsI_37716 [Oryza sativa Indica Group]
BGIOSGA028361	39	54	54	0	0	0	201.476	1.91559e-09	up	hypothetical protein OsI_28584 [Oryza sativa Indica Group]
BGIOSGA016854	290	220	179	508	637	656	0.292367	1.91998e-09	down	PREDICTED: uncharacterized protein LOC9272389 [Oryza sativa Japonica Group]
BGIOSGA020297	48	57	159	2	4	6	16.068	1.92013e-09	up	hypothetical protein OsI_20845 [Oryza sativa Indica Group]
BGIOSGA008797	916	968	998	1857	1386	1518	0.46047	1.93289e-09	down	PREDICTED: F-box protein PP2-A13 isoform X1 [Oryza sativa Japonica Group]
BGIOSGA021557	151	88	63	5	4	12	11.3221	1.93646e-09	up	hypothetical protein OsI_22341 [Oryza sativa Indica Group]
BGIOSGA014898	6	2	5	54	23	69	0.0689966	1.94455e-09	down	OSIGBa0135C13.2 [Oryza sativa Indica Group]
BGIOSGA036907	71	38	96	5	2	4	13.9909	1.94518e-09	up	hypothetical protein OsI_37283 [Oryza sativa Indica Group]
BGIOSGA015822	67	84	81	160	160	186	0.347771	1.96077e-09	down	PREDICTED: uncharacterized protein LOC4334999 [Oryza sativa Japonica Group]
BGIOSGA034859	272	241	335	86	62	53	3.17226	2.00032e-09	up	hypothetical protein OsI_35217 [Oryza sativa Indica Group]
BGIOSGA008543	65	47	128	3	7	3	13.4005	2.00795e-09	up	hypothetical protein OsI_07913 [Oryza sativa Indica Group]
BGIOSGA005435	122	80	154	22	9	17	5.62047	2.01503e-09	up	PREDICTED: alpha/beta hydrolase domain-containing protein 17B [Oryza sativa Japonica Group]
BGIOSGA033735	14657	13808	13706	22357	21749	23367	0.475195	2.02621e-09	down	hypothetical protein OsI_36639 [Oryza sativa Indica Group]
BGIOSGA014920	12	38	6	207	83	348	0.0715345	2.03711e-09	down	PREDICTED: wiskott-Aldrich syndrome protein homolog [Oryza sativa Japonica Group]
BGIOSGA000907	352	360	428	134	74	100	2.82104	2.07477e-09	up	hypothetical protein OsI_03528 [Oryza sativa Indica Group]
BGIOSGA024622	1249	2291	3619	545	261	412	4.41235	2.09128e-09	up	hypothetical protein OsI_25343 [Oryza sativa Indica Group]
BGIOSGA030418	75	46	168	1	0	7	27.1551	2.09542e-09	up	PREDICTED: uncharacterized protein LOC4341034 isoform X1 [Oryza sativa Japonica Group]
BGIOSGA009479	0	0	0	19	44	38	0.00407582	2.09865e-09	down	hypothetical protein OsI_14254 [Oryza sativa Indica Group]
BGIOSGA036188	357	360	371	99	104	124	2.52888	2.10665e-09	up	Yippee-like protein At4g27740, putative [Oryza sativa Japonica Group]
BGIOSGA018665	15	27	8	76	94	114	0.136406	2.12875e-09	down	hypothetical protein OsI_18755 [Oryza sativa Indica Group]
BGIOSGA009480	1248	1750	1886	543	423	587	2.3897	2.15571e-09	up	hypothetical protein OsI_14251 [Oryza sativa Indica Group]
BGIOSGA002986	364	355	752	115	80	113	3.5565	2.17505e-09	up	PREDICTED: uncharacterized protein LOC4325568 [Oryza sativa Japonica Group]
BGIOSGA037618	0	0	0	28	27	34	0.00471382	2.21613e-09	down	PREDICTED: CASP-like protein 4C1 [Oryza sativa Japonica Group]
BGIOSGA026567	78	104	240	9	8	20	8.4809	2.21886e-09	up	hypothetical protein OsI_30082 [Oryza sativa Indica Group]
BGIOSGA005539	338	218	336	63	69	45	3.75827	2.25438e-09	up	hypothetical protein OsI_09081 [Oryza sativa Indica Group]
BGIOSGA024623	3240	1717	2165	600	334	268	4.52735	2.26927e-09	up	hypothetical protein OsI_25338 [Oryza sativa Indica Group]
BGIOSGA012917	3657	3203	3298	5566	4816	5807	0.479113	2.32374e-09	down	PREDICTED: chaperone protein ClpB2, chloroplastic [Oryza sativa Japonica Group]
BGIOSGA010121	51	77	203	8	5	8	11.5535	2.32619e-09	up	hypothetical protein [Oryza sativa Japonica Group]
BGIOSGA007446	520	749	1377	178	126	208	3.85766	2.34466e-09	up	PREDICTED: 18.9 kDa heat shock protein [Oryza sativa Japonica Group]
BGIOSGA004778	4099	5138	4064	8047	7238	9168	0.417313	2.35019e-09	down	hypothetical protein OsI_04388 [Oryza sativa Indica Group]
BGIOSGA034291	156	155	241	359	317	352	0.40227	2.35993e-09	down	hypothetical protein OsI_35527 [Oryza sativa Indica Group]
BGIOSGA022295	1184	1215	1227	1823	1964	2133	0.464243	2.42004e-09	down	hypothetical protein OsI_21629 [Oryza sativa Indica Group]
BGIOSGA025136	3006	2600	1911	7073	6993	5281	0.29616	2.44892e-09	down	hypothetical protein OsI_24866 [Oryza sativa Indica Group]
BGIOSGA030126	0	0	0	35	31	24	0.00461814	2.51389e-09	down	hypothetical protein OsI_30611 [Oryza sativa Indica Group]
BGIOSGA034972	6703	7175	6202	13633	12193	11248	0.411917	2.5176e-09	down	hypothetical protein OsI_35426 [Oryza sativa Indica Group]
BGIOSGA034940	11	4	15	70	66	46	0.121732	2.52324e-09	down	hypothetical protein OsI_35379 [Oryza sativa Indica Group]
BGIOSGA025908	87	90	85	175	206	204	0.338821	2.53632e-09	down	hypothetical protein OsI_26403 [Oryza sativa Indica Group]
BGIOSGA026125	4093	4867	4996	6825	7197	8627	0.467056	2.54189e-09	down	hypothetical protein OsI_26851 [Oryza sativa Indica Group]
BGIOSGA004330	5	2	0	47	72	29	0.0354823	2.59104e-09	down	hypothetical protein OsI_03504 [Oryza sativa Indica Group]
BGIOSGA037538	0	0	0	20	32	43	0.00440568	2.60523e-09	down	hypothetical protein OsI_38628 [Oryza sativa Indica Group]
BGIOSGA030823	769	647	286	3071	3061	1645	0.167896	2.60846e-09	down	hypothetical protein OsI_31502 [Oryza sativa Indica Group]
BGIOSGA017136	51	54	93	0	1	2	49.3307	2.64366e-09	up	hypothetical protein OsI_17429 [Oryza sativa Indica Group]
BGIOSGA009241	375	377	414	690	831	1537	0.292474	2.7073e-09	down	PREDICTED: GATA transcription factor 11 [Oryza sativa Japonica Group]
BGIOSGA008852	119	97	148	28	17	21	4.16799	2.74903e-09	up	hypothetical protein OsI_08554 [Oryza sativa Indica Group]
BGIOSGA020268	0	0	0	25	27	36	0.0047693	2.82745e-09	down	hypothetical protein OsI_20788 [Oryza sativa Indica Group]
BGIOSGA010680	1456	1853	1252	326	284	139	4.6056	2.83866e-09	up	hypothetical protein OsI_11687 [Oryza sativa Indica Group]
BGIOSGA025759	0	0	0	29	20	44	0.00458064	2.87069e-09	down	hypothetical protein OsI_26104 [Oryza sativa Indica Group]
BGIOSGA004380	7020	5562	5060	11638	11088	12009	0.388658	2.90489e-09	down	hypothetical protein OsI_03584 [Oryza sativa Indica Group]
BGIOSGA010210	351	478	742	129	61	122	3.8133	2.99993e-09	up	hypothetical protein OsI_12693 [Oryza sativa Indica Group]
BGIOSGA005351	195	111	479	28	27	25	7.0961	3.01191e-09	up	PREDICTED: P-loop NTPase domain-containing protein LPA1 [Oryza sativa Japonica Group]
BGIOSGA034434	17432	22495	27017	8068	4250	6280	2.74262	3.06786e-09	up	PREDICTED: abscisic stress-ripening protein 3 [Oryza sativa Japonica Group]
BGIOSGA035159	122	126	381	25	21	24	6.54702	3.13698e-09	up	PREDICTED: probable beta-D-xylosidase 7 [Oryza sativa Japonica Group]
BGIOSGA000099	78	91	68	0	0	1	168.788	3.258e-09	up	hypothetical protein OsI_05221 [Oryza sativa Indica Group]
BGIOSGA031380	1662	2058	1566	3696	3804	3337	0.37058	3.3054e-09	down	PREDICTED: UPF0695 membrane protein C977.11/PB8B6.06c [Oryza sativa Japonica Group]
BGIOSGA004592	32	42	80	0	0	0	206.094	3.3123e-09	up	hypothetical protein OsI_04031 [Oryza sativa Indica Group]
BGIOSGA030305	0	0	0	39	15	45	0.00434178	3.34791e-09	down	hypothetical protein OsI_30430 [Oryza sativa Indica Group]
BGIOSGA034481	0	0	0	33	21	33	0.00486254	3.35757e-09	down	PREDICTED: CEN-like protein 2 [Oryza sativa Japonica Group]
BGIOSGA017356	970	82	304	1	0	1	534.99	3.40185e-09	up	H0801D08.7 [Oryza sativa Indica Group]
BGIOSGA002583	159	109	169	346	236	322	0.367287	3.46962e-09	down	PREDICTED: uncharacterized protein LOC4326464 isoform X1 [Oryza sativa Japonica Group]
BGIOSGA000127	209	271	227	61	53	63	3.05134	3.47191e-09	up	PREDICTED: amino-acid permease BAT1 homolog isoform X1 [Oryza sativa Japonica Group]
BGIOSGA005926	7686	7212	7337	11172	11625	12722	0.475384	3.50007e-09	down	PREDICTED: uncharacterized protein LOC4330168 [Oryza sativa Japonica Group]
BGIOSGA036948	609	713	779	261	186	265	2.24936	3.51011e-09	up	hypothetical protein OsI_37378 [Oryza sativa Indica Group]
BGIOSGA017325	1825	1644	1537	2986	3218	3045	0.410739	3.5902e-09	down	PREDICTED: uncharacterized protein At5g50100, mitochondrial [Oryza sativa Japonica Group]
BGIOSGA011160	172	183	1046	0	0	2	510.954	3.60318e-09	up	hypothetical protein OsI_10661 [Oryza sativa Indica Group]
BGIOSGA018644	0	0	0	33	26	26	0.00492194	3.63477e-09	down	hypothetical protein OsI_18791 [Oryza sativa Indica Group]
BGIOSGA034872	66	107	70	0	0	1	173.166	3.63858e-09	up	hypothetical protein OsI_35243 [Oryza sativa Indica Group]
BGIOSGA018628	6	6	7	62	55	29	0.0970559	3.67369e-09	down	hypothetical protein OsI_18817 [Oryza sativa Indica Group]
BGIOSGA003245	0	3	2	26	38	47	0.0339806	3.72183e-09	down	hypothetical protein OsI_01360 [Oryza sativa Indica Group]
BGIOSGA019239	4012	3002	3332	6774	5284	6245	0.432014	3.78135e-09	down	hypothetical protein OsI_18583 [Oryza sativa Indica Group]
BGIOSGA022566	104	169	815	13	11	31	14.3322	3.88059e-09	up	hypothetical protein OsI_22198 [Oryza sativa Indica Group]
BGIOSGA027498	242	121	237	43	28	32	4.40084	3.93001e-09	up	hypothetical protein OsI_28138 [Oryza sativa Indica Group]
BGIOSGA033688	151	60	71	1	0	8	24.8996	4.01021e-09	up	PREDICTED: barwin [Oryza sativa Japonica Group]
BGIOSGA016220	44	45	44	0	0	0	183.191	4.05395e-09	up	hypothetical protein OsI_15564 [Oryza sativa Indica Group]
BGIOSGA012299	295	307	317	92	91	90	2.54917	4.07594e-09	up	hypothetical protein OsI_10890 [Oryza sativa Indica Group]
BGIOSGA020589	160	150	365	41	29	21	5.4336	4.11519e-09	up	hypothetical protein OsI_24354 [Oryza sativa Indica Group]
BGIOSGA024033	278	251	422	541	820	840	0.320138	4.13758e-09	down	Os07g0575500 [Oryza sativa Japonica Group]
BGIOSGA002385	4753	7993	17480	1551	1180	2033	4.69342	4.20768e-09	up	hypothetical protein OsI_00402 [Oryza sativa Indica Group]
BGIOSGA021202	1597	3505	4501	354	321	778	5.02599	4.22919e-09	up	putative brown planthopper-inducible protein BpHi008A [Oryza sativa Indica Group]
BGIOSGA009345	1286	1294	1191	2166	1919	2107	0.464528	4.35741e-09	down	hypothetical protein OsI_09558 [Oryza sativa Indica Group]
BGIOSGA029602	124	171	84	377	307	562	0.238717	4.40324e-09	down	hypothetical protein OsI_31723 [Oryza sativa Indica Group]
BGIOSGA015588	25	26	37	75	79	117	0.245537	4.42081e-09	down	hypothetical protein OsI_14864 [Oryza sativa Indica Group]
BGIOSGA012321	3144	1731	2025	5918	4502	6015	0.32326	4.45447e-09	down	PREDICTED: suppressor of disruption of TFIIS [Oryza sativa Japonica Group]
BGIOSGA033295	222	129	497	13	13	44	9.05552	4.5116e-09	up	hypothetical protein OsI_34358 [Oryza sativa Indica Group]
BGIOSGA032265	75	58	149	0	7	7	14.6944	4.52328e-09	up	hypothetical protein OsI_32806 [Oryza sativa Indica Group]
BGIOSGA024355	207	71	138	13	10	20	7.43618	4.53501e-09	up	hypothetical protein OsI_25899 [Oryza sativa Indica Group]
BGIOSGA021701	509	525	487	1299	852	894	0.381854	4.65305e-09	down	PREDICTED: probable cyclic nucleotide-gated ion channel 20, chloroplastic [Oryza sativa Japonica Group]
BGIOSGA004826	1436	1355	2251	519	443	625	2.38736	4.7218e-09	up	hypothetical protein OsI_04484 [Oryza sativa Indica Group]
BGIOSGA017929	0	1	0	62	43	36	0.00576973	4.77796e-09	down	hypothetical protein OsI_20196 [Oryza sativa Indica Group]
BGIOSGA017683	152	53	423	0	0	0	815.512	4.88673e-09	up	putative membrane protein [Oryza sativa Japonica Group]
EPlOING00000034650	0	0	0	25	37	24	0.00477783	4.89714e-09	down	.
BGIOSGA023776	525	426	655	832	943	1185	0.40794	4.96715e-09	down	PREDICTED: uncharacterized protein At5g39865 [Oryza sativa Japonica Group]
BGIOSGA027063	158	160	330	22	26	49	4.98969	5.08643e-09	up	hypothetical protein OsI_29036 [Oryza sativa Indica Group]
BGIOSGA029499	113	61	162	11	13	4	8.7514	5.10033e-09	up	hypothetical protein OsI_31919 [Oryza sativa Indica Group]
BGIOSGA035510	252	243	549	72	60	71	3.80018	5.15587e-09	up	hypothetical protein OsI_36606 [Oryza sativa Indica Group]
BGIOSGA018745	828	706	968	301	282	289	2.15891	5.17202e-09	up	hypothetical protein OsI_18597 [Oryza sativa Indica Group]
BGIOSGA031385	414	229	204	1029	1038	714	0.231779	5.18023e-09	down	hypothetical protein OsI_34681 [Oryza sativa Indica Group]
BGIOSGA002463	37	56	194	4	0	3	30.1283	5.25923e-09	up	hypothetical protein OsI_00243 [Oryza sativa Indica Group]
BGIOSGA006902	1868	2194	1257	4284	4999	4505	0.295625	5.28222e-09	down	hypothetical protein OsI_06312 [Oryza sativa Indica Group]
BGIOSGA002477	99	78	369	8	10	18	10.9861	5.36414e-09	up	putative Bowman Birk trypsin inhibitor [Oryza sativa Indica Group]
BGIOSGA001706	298	255	304	499	452	472	0.455667	5.37089e-09	down	PREDICTED: translation initiation factor IF-2 [Oryza sativa Japonica Group]
BGIOSGA029864	38	44	47	0	0	0	176.834	5.41783e-09	up	hypothetical protein OsI_31158 [Oryza sativa Indica Group]
BGIOSGA011795	91	161	244	22	3	18	8.81387	5.43293e-09	up	hypothetical protein OsI_09902 [Oryza sativa Indica Group]
BGIOSGA033701	2403	1846	2122	3442	3919	4066	0.421919	5.45936e-09	down	harpin binding protein 1 [Oryza sativa Indica Group]
BGIOSGA026437	385	355	420	125	99	149	2.37226	5.49497e-09	up	PREDICTED: probable protein phosphatase 2C 33 [Oryza sativa Japonica Group]
BGIOSGA017219	435	464	1525	55	58	142	7.01657	5.56524e-09	up	hypothetical protein OsI_17619 [Oryza sativa Indica Group]
BGIOSGA032087	117	136	311	16	8	33	7.46302	5.63575e-09	up	hypothetical protein OsI_33186 [Oryza sativa Indica Group]
BGIOSGA033690	127	79	99	4	3	17	9.92084	5.66027e-09	up	hypothetical protein OsI_36717 [Oryza sativa Indica Group]
BGIOSGA014243	3	4	0	40	32	35	0.050446	5.73659e-09	down	H0423H10.10 [Oryza sativa Indica Group]
BGIOSGA016970	474	332	668	943	922	1481	0.331424	5.80953e-09	down	hypothetical protein OsI_17069 [Oryza sativa Indica Group]
BGIOSGA002182	4105	3891	3227	6907	6486	7232	0.416868	5.85883e-09	down	hypothetical protein OsI_00793 [Oryza sativa Indica Group]
BGIOSGA001014	148	172	186	281	392	534	0.317598	5.89339e-09	down	PREDICTED: uncharacterized protein LOC4324397 [Oryza sativa Japonica Group]
BGIOSGA027171	8	13	21	63	46	80	0.167932	5.92622e-09	down	hypothetical protein OsI_28823 [Oryza sativa Indica Group]
BGIOSGA029868	133	99	70	4	12	11	8.55835	5.97623e-09	up	hypothetical protein OsI_31149 [Oryza sativa Indica Group]
BGIOSGA027817	1874	1908	1312	3580	3590	3864	0.354828	5.98739e-09	down	PREDICTED: ascorbate-specific transmembrane electron transporter 1 [Oryza sativa Japonica Group]
BGIOSGA005477	363	323	487	32	14	87	6.88353	6.06916e-09	up	hypothetical protein OsI_09192 [Oryza sativa Indica Group]
BGIOSGA010803	486	477	651	198	154	203	2.19915	6.11481e-09	up	PREDICTED: hydroxyacylglutathione hydrolase cytoplasmic [Oryza sativa Japonica Group]
BGIOSGA036198	651	355	257	70	63	59	5.08671	6.13882e-09	up	hypothetical protein OsI_38323 [Oryza sativa Indica Group]
BGIOSGA028587	43	42	42	0	0	0	174.916	6.15275e-09	up	hypothetical protein OsI_29074 [Oryza sativa Indica Group]
BGIOSGA020507	410	403	215	864	923	1423	0.250291	6.28015e-09	down	PREDICTED: NAC transcription factor 29 [Oryza sativa Japonica Group]
BGIOSGA017937	839	679	276	3277	3097	1818	0.168856	6.41089e-09	down	hypothetical protein OsI_20175 [Oryza sativa Indica Group]
BGIOSGA029436	4903	4088	3057	9845	10199	8588	0.321339	6.44794e-09	down	PREDICTED: probable hydroxyacylglutathione hydrolase 2, chloroplastic [Oryza sativa Japonica Group]
BGIOSGA025723	66	79	205	10	8	14	8.06028	6.61241e-09	up	hypothetical protein OsI_26048 [Oryza sativa Indica Group]
BGIOSGA021872	7821	4838	5497	1872	1280	1797	2.82764	6.77181e-09	up	putative lipase [Oryza sativa Japonica Group]
BGIOSGA009022	2957	1997	2418	4659	4284	4588	0.41402	6.84487e-09	down	hypothetical protein OsI_08870 [Oryza sativa Indica Group]
BGIOSGA019679	133	306	665	22	3	38	13.3346	7.04816e-09	up	PREDICTED: universal stress protein A-like protein [Oryza sativa Japonica Group]
BGIOSGA029395	2107	1887	3151	801	730	854	2.24087	7.11111e-09	up	RecName: Full=Probable 6-phosphogluconolactonase 4, chloroplastic; Short=6PGL 4; Flags: Precursor
BGIOSGA002389	3793	6451	12045	1641	878	1437	4.20312	7.15365e-09	up	hypothetical protein OsI_00402 [Oryza sativa Indica Group]
BGIOSGA034348	807	557	1310	208	199	155	3.49405	7.19682e-09	up	hypothetical protein OsI_35452 [Oryza sativa Indica Group]
BGIOSGA009324	622	456	427	1036	1197	1096	0.343552	7.31406e-09	down	hypothetical protein OsI_09508 [Oryza sativa Indica Group]
BGIOSGA013254	1025	358	602	78	72	143	5.24611	7.42653e-09	up	hypothetical protein OsI_12886 [Oryza sativa Indica Group]
BGIOSGA037323	86	46	73	173	144	226	0.288391	7.45679e-09	down	PREDICTED: uncharacterized protein LOC9272205 [Oryza sativa Japonica Group]
BGIOSGA025060	58	112	263	8	3	16	11.9958	7.62423e-09	up	unknown protein [Oryza sativa Japonica Group]
BGIOSGA032247	4185	4089	7437	1668	1377	1652	2.49275	7.64665e-09	up	hypothetical protein OsI_32842 [Oryza sativa Indica Group]
BGIOSGA023687	131	64	91	9	8	15	6.86563	7.71102e-09	up	hypothetical protein OsI_27402 [Oryza sativa Indica Group]
BGIOSGA005776	928	943	345	3672	3550	2250	0.180636	7.73586e-09	down	hypothetical protein OsI_08612 [Oryza sativa Indica Group]
BGIOSGA004018	2091	2039	2062	3149	2676	3681	0.498547	7.97439e-09	down	hypothetical protein OsI_02914 [Oryza sativa Indica Group]
BGIOSGA016037	393	682	654	165	130	147	2.963	8.01186e-09	up	hypothetical protein OsI_15157 [Oryza sativa Indica Group]
BGIOSGA004046	53	37	139	1	2	5	21.0161	8.06179e-09	up	hypothetical protein OsI_02956 [Oryza sativa Indica Group]
BGIOSGA028525	4453	4095	3719	7535	8638	7410	0.393661	8.07318e-09	down	hypothetical protein OsI_28948 [Oryza sativa Indica Group]
BGIOSGA013917	4210	2851	3578	6645	5663	6519	0.430041	8.10946e-09	down	hypothetical protein OsI_14278 [Oryza sativa Indica Group]
BGIOSGA032805	16	13	18	55	52	130	0.152763	8.1328e-09	down	hypothetical protein OsI_33296 [Oryza sativa Indica Group]
BGIOSGA006256	544	355	330	1175	1009	881	0.306369	8.18969e-09	down	hypothetical protein OsI_07656 [Oryza sativa Indica Group]
BGIOSGA021274	510	450	378	806	873	1109	0.368434	8.25515e-09	down	hypothetical protein OsI_22920 [Oryza sativa Indica Group]
BGIOSGA036109	3390	3007	1935	5850	7362	9435	0.284602	8.2826e-09	down	hypothetical protein OsI_38495 [Oryza sativa Indica Group]
BGIOSGA031709	31	64	80	2	2	1	26.0794	8.33619e-09	up	hypothetical protein OsI_33995 [Oryza sativa Indica Group]
BGIOSGA036618	98	83	68	269	253	177	0.270099	8.42346e-09	down	hypothetical protein OsI_37502 [Oryza sativa Indica Group]
BGIOSGA002569	326	307	284	680	531	532	0.40128	8.46756e-09	down	putative GTPase-activating protein [Oryza sativa Japonica Group]
BGIOSGA002647	40	48	37	0	0	0	173.127	8.49146e-09	up	hypothetical protein OsI_00133 [Oryza sativa Indica Group]
BGIOSGA031094	138	31	70	4	1	3	23.1238	8.49344e-09	up	PREDICTED: uncharacterized protein LOC4347585 [Oryza sativa Japonica Group]
BGIOSGA023093	152	144	311	30	23	47	4.54699	8.54262e-09	up	PREDICTED: probable inositol oxygenase [Oryza sativa Japonica Group]
BGIOSGA012305	1977	1709	2574	394	403	774	3.03307	8.57079e-09	up	hypothetical protein OsI_10909 [Oryza sativa Indica Group]
BGIOSGA037243	483	490	439	905	836	797	0.422921	8.62972e-09	down	hypothetical protein OsI_38004 [Oryza sativa Indica Group]
BGIOSGA018492	183	176	190	301	296	344	0.442731	8.64527e-09	down	PREDICTED: uncharacterized protein LOC4351971 [Oryza sativa Japonica Group]
BGIOSGA009733	818	481	635	1260	1610	1518	0.332246	8.72286e-09	down	PREDICTED: putative S-adenosyl-L-methionine-dependent methyltransferase Mvan_0910 [Oryza sativa Japonica Group]
BGIOSGA020320	321	278	361	628	506	503	0.442462	8.82495e-09	down	hypothetical protein OsI_20887 [Oryza sativa Indica Group]
BGIOSGA030666	80	159	347	17	11	27	7.91113	8.88079e-09	up	hypothetical protein OsI_31179 [Oryza sativa Indica Group]
BGIOSGA000859	319	309	420	121	63	97	2.83849	8.9162e-09	up	hypothetical protein OsI_03669 [Oryza sativa Indica Group]
BGIOSGA037666	81	53	76	1	0	0	147.72	8.98466e-09	up	heparanase [Oryza sativa Indica Group]
BGIOSGA020293	145	171	507	21	21	45	6.96718	9.19488e-09	up	hypothetical protein OsI_20839 [Oryza sativa Indica Group]
BGIOSGA019036	1074	927	893	1597	1514	1922	0.440262	9.36324e-09	down	PREDICTED: PGR5-like protein 1A, chloroplastic [Oryza sativa Japonica Group]
BGIOSGA009229	133	145	165	297	229	260	0.42711	9.70837e-09	down	hypothetical protein OsI_09326 [Oryza sativa Indica Group]
BGIOSGA002693	14	143	54	0	0	0	295.317	9.81137e-09	up	PREDICTED: Bowman-Birk type bran trypsin inhibitor [Oryza sativa Japonica Group]
BGIOSGA035916	1618	1654	2632	682	486	717	2.36071	9.85786e-09	up	hypothetical protein OsI_38931 [Oryza sativa Indica Group]
BGIOSGA037393	149	160	223	24	43	34	3.90596	1.00575e-08	up	PREDICTED: uncharacterized protein LOC4352219 [Oryza sativa Japonica Group]
BGIOSGA007798	209	135	218	47	16	30	4.6268	1.00699e-08	up	hypothetical protein OsI_06388 [Oryza sativa Indica Group]
BGIOSGA001883	77	29	80	3	2	3	17.484	1.01044e-08	up	PREDICTED: blue copper protein [Oryza sativa Japonica Group]
BGIOSGA020509	51	47	159	4	6	4	13.2222	1.01736e-08	up	hypothetical protein OsI_24509 [Oryza sativa Indica Group]
BGIOSGA007756	205	140	137	446	359	340	0.321542	1.02593e-08	down	hypothetical protein OsI_06300 [Oryza sativa Indica Group]
BGIOSGA018699	1091	753	1251	312	287	367	2.41561	1.0403e-08	up	hypothetical protein OsI_18677 [Oryza sativa Indica Group]
BGIOSGA011560	403	318	673	107	93	134	3.11747	1.04073e-08	up	PREDICTED: peroxidase 5 [Oryza sativa Japonica Group]
BGIOSGA031406	51	39	65	2	1	1	29.1659	1.05892e-08	up	hypothetical protein OsI_34640 [Oryza sativa Indica Group]
BGIOSGA034334	0	1	1	40	34	53	0.0119842	1.07961e-08	down	hypothetical protein OsI_35476 [Oryza sativa Indica Group]
BGIOSGA010567	335	330	669	113	93	101	3.21838	1.08715e-08	up	PREDICTED: trafficking protein particle complex subunit 3 [Oryza sativa Japonica Group]
BGIOSGA028821	1505	789	813	2503	2903	3040	0.281447	1.10118e-08	down	hypothetical protein OsI_29535 [Oryza sativa Indica Group]
BGIOSGA036113	61	55	58	6	5	6	7.80027	1.10978e-08	up	hypothetical protein OsI_38490 [Oryza sativa Indica Group]
BGIOSGA023647	662	842	883	1228	1133	1398	0.481507	1.1183e-08	down	unknown protein [Oryza sativa Japonica Group]
BGIOSGA030021	314	363	482	122	77	130	2.6765	1.12161e-08	up	hypothetical protein OsI_30819 [Oryza sativa Indica Group]
BGIOSGA002829	291	377	344	722	486	647	0.417778	1.12832e-08	down	hypothetical protein OsI_00484 [Oryza sativa Indica Group]
BGIOSGA002740	55	30	36	109	108	175	0.237439	1.13469e-08	down	hypothetical protein OsI_00319 [Oryza sativa Indica Group]
BGIOSGA015174	1060	504	1062	40	3	13	36.4353	1.1448e-08	up	hypothetical protein OsI_15735 [Oryza sativa Indica Group]
BGIOSGA005870	85	75	288	15	6	14	9.40928	1.16697e-08	up	hypothetical protein OsI_08409 [Oryza sativa Indica Group]
BGIOSGA037772	2488	2336	1938	685	627	818	2.44304	1.17638e-08	up	PREDICTED: transcription factor PIF4 isoform X2 [Oryza sativa Japonica Group]
BGIOSGA036867	0	0	0	29	24	22	0.0055654	1.21023e-08	down	hypothetical protein OsI_37191 [Oryza sativa Indica Group]
BGIOSGA008842	3	0	0	26	33	72	0.0177944	1.25833e-08	down	PREDICTED: E3 ubiquitin-protein ligase PUB23 [Oryza sativa Japonica Group]
BGIOSGA011204	279	414	658	95	96	107	3.36199	1.26486e-08	up	hypothetical protein OsI_10547 [Oryza sativa Indica Group]
BGIOSGA022255	1006	1064	1309	1660	1823	1794	0.480131	1.29253e-08	down	PREDICTED: ATP-dependent Clp protease proteolytic subunit-related protein 2, chloroplastic [Oryza sativa Japonica Group]
BGIOSGA008961	239	202	299	78	56	76	2.66629	1.29344e-08	up	hypothetical protein OsI_08762 [Oryza sativa Indica Group]
BGIOSGA028549	56	18	78	0	0	0	203.155	1.29492e-08	up	putative pirin [Oryza sativa Japonica Group]
BGIOSGA036810	77	102	127	14	18	19	4.50031	1.3165e-08	up	hypothetical protein OsI_37142 [Oryza sativa Indica Group]
BGIOSGA016708	1648	1415	2830	454	395	665	2.92074	1.31881e-08	up	PREDICTED: shikimate O-hydroxycinnamoyltransferase [Oryza sativa Japonica Group]
BGIOSGA014039	0	3	1	39	26	34	0.0308923	1.32645e-08	down	H0701F11.13 [Oryza sativa Indica Group]
BGIOSGA000440	64	68	35	172	190	720	0.123696	1.33208e-08	down	hypothetical protein OsI_04543 [Oryza sativa Indica Group]
BGIOSGA000010	587	455	734	87	82	195	3.73186	1.34629e-08	up	PREDICTED: probable aquaporin TIP1-2 [Oryza brachyantha]
EPlOING00000024061	42	26	58	0	0	0	170.058	1.34638e-08	up	.
BGIOSGA030986	4	24	4	94	93	97	0.0877029	1.35591e-08	down	hypothetical protein OsI_31803 [Oryza sativa Indica Group]
BGIOSGA017548	263	252	1606	39	25	74	11.1557	1.35777e-08	up	hypothetical protein OsI_21013 [Oryza sativa Indica Group]
BGIOSGA033275	717	819	714	1219	1269	1358	0.445003	1.37589e-08	down	hypothetical protein OsI_34311 [Oryza sativa Indica Group]
BGIOSGA000029	5031	5506	2915	12364	11149	11529	0.297229	1.39905e-08	down	PREDICTED: protease HtpX homolog isoform X1 [Oryza sativa Japonica Group]
BGIOSGA008875	413	543	746	133	109	196	2.94293	1.40437e-08	up	hypothetical protein OsI_08588 [Oryza sativa Indica Group]
BGIOSGA035782	0	0	0	32	25	19	0.00547739	1.40927e-08	down	hypothetical protein OsI_39223 [Oryza sativa Indica Group]
BGIOSGA002068	941	1008	1844	367	281	388	2.7347	1.41601e-08	up	hypothetical protein OsI_01034 [Oryza sativa Indica Group]
BGIOSGA013817	209	156	190	44	45	48	3.07174	1.4375e-08	up	hypothetical protein OsI_14064 [Oryza sativa Indica Group]
BGIOSGA002374	0	0	0	27	23	23	0.00572576	1.44072e-08	down	hypothetical protein OsI_00450 [Oryza sativa Indica Group]
BGIOSGA030277	43	119	241	12	4	10	11.5022	1.47193e-08	up	PREDICTED: uncharacterized protein LOC4346387 [Oryza sativa Japonica Group]
BGIOSGA007745	230	215	336	79	66	72	2.6989	1.4751e-08	up	hypothetical protein OsI_06268 [Oryza sativa Indica Group]
BGIOSGA025582	2888	2559	1859	7121	5322	4856	0.324786	1.48091e-08	down	hypothetical protein OsI_25780 [Oryza sativa Indica Group]
BGIOSGA017890	109	80	120	10	19	18	4.92453	1.49365e-08	up	hypothetical protein OsI_20272 [Oryza sativa Indica Group]
BGIOSGA018725	92	160	58	351	439	380	0.20406	1.54303e-08	down	PREDICTED: phospholipase D alpha 1-like [Oryza sativa Japonica Group]
BGIOSGA033324	39	27	56	0	0	0	164.729	1.55969e-08	up	hypothetical protein OsI_34416 [Oryza sativa Indica Group]
BGIOSGA016942	43	46	57	121	143	108	0.292548	1.56292e-08	down	replication factor C 40kDa subunit [Oryza sativa Japonica Group]
BGIOSGA017908	19	42	96	0	0	0	206.91	1.57749e-08	up	hypothetical protein OsI_20243 [Oryza sativa Indica Group]
BGIOSGA017637	283	345	372	116	85	112	2.42951	1.58635e-08	up	hypothetical protein OsI_20844 [Oryza sativa Indica Group]
BGIOSGA015543	0	0	0	22	21	30	0.0057645	1.59731e-08	down	hypothetical protein OsI_14953 [Oryza sativa Indica Group]
BGIOSGA035281	84	42	62	156	160	188	0.283323	1.60189e-08	down	hypothetical protein OsI_36146 [Oryza sativa Indica Group]
BGIOSGA011164	1	1	0	43	43	35	0.0124715	1.61983e-08	down	hypothetical protein OsI_10648 [Oryza sativa Indica Group]
BGIOSGA035810	45	36	35	0	0	0	160.407	1.62829e-08	up	hypothetical protein OsI_39162 [Oryza sativa Indica Group]
BGIOSGA001877	264	222	253	450	384	411	0.450485	1.66162e-08	down	hypothetical protein OsI_01431 [Oryza sativa Indica Group]
BGIOSGA000054	1079	962	923	1733	1776	1679	0.433514	1.68523e-08	down	PREDICTED: actin-97 [Oryza sativa Japonica Group]
BGIOSGA012679	557	575	530	910	935	1510	0.381044	1.68862e-08	down	hypothetical protein OsI_11685 [Oryza sativa Indica Group]
BGIOSGA027428	72	53	66	0	0	1	134.708	1.71327e-08	up	hypothetical protein OsI_28304 [Oryza sativa Indica Group]
BGIOSGA012440	276	191	247	423	415	475	0.412353	1.72662e-08	down	hypothetical protein OsI_11194 [Oryza sativa Indica Group]
BGIOSGA027665	38	50	31	0	0	0	165.747	1.73494e-08	up	hypothetical protein OsI_27787 [Oryza sativa Indica Group]
BGIOSGA008869	1840	1517	1595	3334	2644	2643	0.437242	1.73921e-08	down	hypothetical protein OsI_08580 [Oryza sativa Indica Group]
BGIOSGA011181	6778	5703	4992	10327	12950	12416	0.372153	1.74056e-08	down	hypothetical protein OsI_10615 [Oryza sativa Indica Group]
BGIOSGA003054	111	102	190	277	258	287	0.365171	1.76968e-08	down	hypothetical protein OsI_00989 [Oryza sativa Indica Group]
BGIOSGA005583	47	40	143	0	0	3	56.5823	1.78175e-08	up	PREDICTED: blue copper protein [Oryza sativa Japonica Group]
BGIOSGA017932	956	942	1556	376	253	410	2.5099	1.79609e-08	up	hypothetical protein OsI_20190 [Oryza sativa Indica Group]
BGIOSGA036016	80	49	72	1	0	1	76.5818	1.81719e-08	up	hypothetical protein OsI_38710 [Oryza sativa Indica Group]
BGIOSGA000799	101	112	191	31	17	23	4.26729	1.86457e-08	up	hypothetical protein OsI_03795 [Oryza sativa Indica Group]
BGIOSGA020962	2	1	0	30	32	37	0.0230991	1.8653e-08	down	hypothetical protein OsI_23527 [Oryza sativa Indica Group]
BGIOSGA000282	1202	4205	1303	17	15	92	44.1516	1.87999e-08	up	PREDICTED: protein S100-A9 [Oryza sativa Japonica Group]
EPlOING00000030283	0	0	0	28	18	26	0.005865	1.89368e-08	down	.
BGIOSGA036841	444	295	196	1077	1265	796	0.226892	1.92316e-08	down	hypothetical protein OsI_37125 [Oryza sativa Indica Group]
BGIOSGA027772	739	724	778	1054	1057	1332	0.494951	2.00745e-08	down	hypothetical protein OsI_27557 [Oryza sativa Indica Group]
BGIOSGA027458	0	1	2	52	35	23	0.0203314	2.0133e-08	down	hypothetical protein OsI_28241 [Oryza sativa Indica Group]
BGIOSGA036686	0	0	0	53	22	14	0.00471602	2.044e-08	down	hypothetical protein OsI_37367 [Oryza sativa Indica Group]
BGIOSGA014657	11707	16600	16564	5507	3561	5498	2.35865	2.05357e-08	up	PREDICTED: remorin [Oryza sativa Japonica Group]
BGIOSGA002761	4	6	13	35	53	54	0.119515	2.06976e-08	down	hypothetical protein OsI_00359 [Oryza sativa Indica Group]
BGIOSGA007492	252	134	79	580	706	583	0.191628	2.06999e-08	down	hypothetical protein OsI_05778 [Oryza sativa Indica Group]
BGIOSGA020894	19	15	33	96	58	77	0.218041	2.09197e-08	down	hypothetical protein OsI_23693 [Oryza sativa Indica Group]
BGIOSGA029617	102	115	119	196	320	289	0.312484	2.11643e-08	down	RecName: Full=Zinc-finger homeodomain protein 1
BGIOSGA025191	658	247	460	58	33	103	5.48483	2.1422e-08	up	hypothetical protein OsI_24980 [Oryza sativa Indica Group]
BGIOSGA017354	652	701	914	250	252	302	2.1229	2.18766e-08	up	PREDICTED: uncharacterized protein LOC4337412 isoform X2 [Oryza sativa Japonica Group]
BGIOSGA016381	96	81	125	217	161	204	0.391996	2.21924e-08	down	hypothetical protein OsI_15843 [Oryza sativa Indica Group]
BGIOSGA023762	693	377	351	1299	1324	1243	0.281502	2.26321e-08	down	hypothetical protein OsI_27218 [Oryza sativa Indica Group]
BGIOSGA025469	292	286	714	71	33	94	4.90629	2.30069e-08	up	PREDICTED: uncharacterized protein LOC4342852 [Oryza sativa Japonica Group]
BGIOSGA013984	351	412	1307	73	71	126	5.60959	2.31889e-08	up	hypothetical protein OsI_14401 [Oryza sativa Indica Group]
BGIOSGA020081	168	274	407	33	28	72	4.83869	2.33876e-08	up	hypothetical protein OsI_20406 [Oryza sativa Indica Group]
BGIOSGA014590	244	147	200	385	358	503	0.362114	2.38968e-08	down	hypothetical protein OsI_16906 [Oryza sativa Indica Group]
BGIOSGA025248	672	825	848	2949	2255	1231	0.272734	2.39554e-08	down	PREDICTED: low molecular mass early light-inducible protein HV60, chloroplastic [Oryza sativa Japonica Group]
BGIOSGA035046	0	0	0	22	18	31	0.00595948	2.40923e-08	down	hypothetical protein OsI_35617 [Oryza sativa Indica Group]
BGIOSGA024947	63	30	167	0	0	1	174.629	2.41092e-08	up	PREDICTED: uncharacterized protein LOC107275470 [Oryza sativa Japonica Group]
BGIOSGA015643	29	41	41	0	0	0	152.093	2.42493e-08	up	hypothetical protein OsI_14742 [Oryza sativa Indica Group]
BGIOSGA028419	0	0	0	18	30	24	0.00572826	2.43278e-08	down	putative transcription factor [Oryza sativa Japonica Group]
BGIOSGA018697	39	24	55	0	0	0	159.12	2.48917e-08	up	hypothetical protein OsI_18679 [Oryza sativa Indica Group]
BGIOSGA037152	309	330	260	931	637	541	0.325895	2.48922e-08	down	hypothetical protein OsI_37810 [Oryza sativa Indica Group]
BGIOSGA016632	613	562	1074	218	172	238	2.67769	2.51131e-08	up	hypothetical protein OsI_16377 [Oryza sativa Indica Group]
BGIOSGA034715	7	0	2	45	30	43	0.0586579	2.53991e-08	down	hypothetical protein OsI_34936 [Oryza sativa Indica Group]
BGIOSGA007980	20659	14943	9950	50659	44619	34851	0.269055	2.54938e-08	down	hypothetical protein OsI_06773 [Oryza sativa Indica Group]
BGIOSGA002616	730	657	710	1261	997	1062	0.480232	2.59311e-08	down	hypothetical protein OsI_00077 [Oryza sativa Indica Group]
BGIOSGA001564	188	208	141	946	301	610	0.227644	2.62497e-08	down	hypothetical protein OsI_02101 [Oryza sativa Indica Group]
BGIOSGA008396	441	326	355	857	592	695	0.400666	2.67873e-08	down	hypothetical protein OsI_07592 [Oryza sativa Indica Group]
BGIOSGA004187	355	249	393	96	88	70	2.93664	2.68483e-08	up	hypothetical protein OsI_03238 [Oryza sativa Indica Group]
BGIOSGA003388	80	32	79	4	5	3	11.8636	2.70777e-08	up	hypothetical protein OsI_01645 [Oryza sativa Indica Group]
BGIOSGA034300	50	27	37	0	0	0	157.02	2.74713e-08	up	hypothetical protein OsI_35514 [Oryza sativa Indica Group]
BGIOSGA026713	74	45	131	6	6	11	8.08175	2.78644e-08	up	PREDICTED: DNA-damage-repair/toleration protein DRT100 [Oryza sativa Japonica Group]
BGIOSGA005447	81	97	172	24	13	13	5.21466	2.80973e-08	up	PREDICTED: cytochrome c oxidase copper chaperone 1 [Oryza sativa Japonica Group]
BGIOSGA020098	513	483	959	199	133	142	3.06591	2.85655e-08	up	PREDICTED: cytochrome P450 98A1 [Oryza sativa Japonica Group]
BGIOSGA030638	51	24	41	0	0	0	159.055	2.89701e-08	up	hypothetical protein OsI_31123 [Oryza sativa Indica Group]
BGIOSGA033253	710	687	603	1269	1100	1120	0.437489	2.89719e-08	down	hypothetical protein OsI_34270 [Oryza sativa Indica Group]
BGIOSGA005906	434	424	433	736	816	706	0.430797	2.90161e-08	down	PREDICTED: uncharacterized protein LOC4330206 [Oryza sativa Japonica Group]
BGIOSGA004618	727	782	1061	333	273	280	2.17755	2.94627e-08	up	hypothetical protein OsI_04084 [Oryza sativa Indica Group]
BGIOSGA032680	296	240	231	53	60	30	4.02899	2.95963e-08	up	hypothetical protein OsI_33044 [Oryza sativa Indica Group]
BGIOSGA016952	301	155	223	615	448	515	0.328242	2.99939e-08	down	hypothetical protein OsI_17044 [Oryza sativa Indica Group]
BGIOSGA019014	5147	4255	5032	6770	6956	8348	0.496237	3.00242e-08	down	PREDICTED: protein EMBRYO SAC DEVELOPMENT ARREST 3, chloroplastic isoform X2 [Oryza sativa Japonica Group]
BGIOSGA002367	2	0	1	31	27	37	0.0240061	3.01059e-08	down	hypothetical protein OsI_00462 [Oryza sativa Indica Group]
BGIOSGA011514	269	242	244	441	408	713	0.372373	3.02679e-08	down	PREDICTED: NAC domain-containing protein 67-like [Oryza sativa Japonica Group]
BGIOSGA025418	49	28	35	0	0	0	154.555	3.0306e-08	up	hypothetical protein OsI_25435 [Oryza sativa Indica Group]
EPlOING00000039870	12	13	15	47	42	87	0.174349	3.07642e-08	down	.
BGIOSGA019016	198	280	630	70	55	50	4.62381	3.08626e-08	up	hypothetical protein OsI_18124 [Oryza sativa Indica Group]
BGIOSGA000926	1663	1126	1098	2876	2998	2561	0.350171	3.09254e-08	down	hypothetical protein OsI_03487 [Oryza sativa Indica Group]
BGIOSGA024282	806	540	461	1260	1703	1601	0.30183	3.09496e-08	down	hypothetical protein OsI_26059 [Oryza sativa Indica Group]
BGIOSGA029356	155	152	317	37	37	49	3.76483	3.11328e-08	up	PREDICTED: acyl carrier protein 2, chloroplastic [Oryza sativa Japonica Group]
BGIOSGA007570	594	397	493	91	126	60	3.97561	3.11721e-08	up	PREDICTED: probable arabinose 5-phosphate isomerase [Oryza sativa Japonica Group]
BGIOSGA017158	40	69	21	0	0	0	184.087	3.22424e-08	up	hypothetical protein OsI_17467 [Oryza sativa Indica Group]
BGIOSGA016303	193	196	175	417	317	331	0.404305	3.23001e-08	down	hypothetical protein OsI_15701 [Oryza sativa Indica Group]
BGIOSGA034592	30	53	72	3	2	2	16.5562	3.23886e-08	up	hypothetical protein OsI_34919 [Oryza sativa Indica Group]
BGIOSGA018450	18	23	28	70	73	66	0.247361	3.27015e-08	down	PREDICTED: D-amino-acid transaminase, chloroplastic [Oryza sativa Japonica Group]
BGIOSGA016120	894	960	878	284	274	373	2.24664	3.32628e-08	up	hypothetical protein OsI_15341 [Oryza sativa Indica Group]
BGIOSGA019119	785	959	813	315	218	302	2.35456	3.35775e-08	up	hypothetical protein OsI_18313 [Oryza sativa Indica Group]
BGIOSGA017094	95	81	46	270	167	247	0.253888	3.36188e-08	down	OSJNBa0085I10.18 [Oryza sativa Japonica Group]
BGIOSGA027979	77	83	91	18	12	10	4.75179	3.37282e-08	up	hypothetical protein OsI_27792 [Oryza sativa Indica Group]
BGIOSGA010694	299	369	1598	56	49	107	7.76695	3.50406e-08	up	hypothetical protein OsJ_10920 [Oryza sativa Japonica Group]
BGIOSGA021991	44	63	95	8	0	3	13.9542	3.53125e-08	up	hypothetical protein OsI_21522 [Oryza sativa Indica Group]
BGIOSGA000595	782	798	838	1135	1179	1578	0.47315	3.53467e-08	down	PREDICTED: calcium uniporter protein 6, mitochondrial [Oryza sativa Japonica Group]
BGIOSGA004591	120	191	425	28	18	46	5.96576	3.54695e-08	up	hypothetical protein OsI_04029 [Oryza sativa Indica Group]
BGIOSGA002839	2	3	1	16	24	165	0.0235983	3.55649e-08	down	hypothetical protein OsI_00509 [Oryza sativa Indica Group]
BGIOSGA001190	133	218	301	30	21	56	4.63469	3.59922e-08	up	hypothetical protein OsI_02897 [Oryza sativa Indica Group]
BGIOSGA026146	49	47	150	6	6	5	10.4971	3.60335e-08	up	hypothetical protein OsI_26884 [Oryza sativa Indica Group]
BGIOSGA007064	1069	1150	1177	1590	1979	2305	0.437812	3.63359e-08	down	hypothetical protein OsI_06005 [Oryza sativa Indica Group]
BGIOSGA003748	2979	2508	2340	4745	5387	4669	0.400578	3.66733e-08	down	hypothetical protein OsI_02395 [Oryza sativa Indica Group]
BGIOSGA019151	5608	6234	8893	2757	1863	2620	2.16405	3.68296e-08	up	hypothetical protein OsI_18377 [Oryza sativa Indica Group]
BGIOSGA035760	214	176	296	56	62	55	2.95253	3.73401e-08	up	hypothetical protein OsI_39268 [Oryza sativa Indica Group]
BGIOSGA027406	21	38	59	0	0	0	158.478	3.77109e-08	up	hypothetical protein OsI_28343 [Oryza sativa Indica Group]
BGIOSGA017473	11039	11285	10786	17889	16052	16412	0.499867	3.7792e-08	down	hypothetical protein OsI_21172 [Oryza sativa Indica Group]
BGIOSGA007025	122	136	211	12	33	22	5.12449	3.79903e-08	up	hypothetical protein OsI_06088 [Oryza sativa Indica Group]
BGIOSGA031164	178	245	263	71	51	64	2.79791	3.80209e-08	up	PREDICTED: peptidyl-prolyl cis-trans isomerase CYP21-1 [Oryza sativa Japonica Group]
EPlOING00000038226	0	0	0	24	37	14	0.00541121	3.82143e-08	down	.
BGIOSGA009850	3171	2032	2710	881	516	444	3.26548	3.82326e-08	up	PREDICTED: endoglucanase 10 [Oryza sativa Japonica Group]
BGIOSGA034284	8741	7949	4728	22936	18764	15453	0.288761	3.83707e-08	down	hypothetical protein OsI_35541 [Oryza sativa Indica Group]
BGIOSGA021615	3716	3603	7616	1391	1240	1249	2.83564	3.89012e-08	up	PREDICTED: aquaporin NIP2-2 [Oryza sativa Japonica Group]
BGIOSGA022438	6040	4563	4168	9671	10154	9473	0.384057	4.04092e-08	down	hypothetical protein OsI_21947 [Oryza sativa Indica Group]
BGIOSGA015092	0	0	0	23	17	26	0.00639824	4.06629e-08	down	hypothetical protein OsI_15926 [Oryza sativa Indica Group]
BGIOSGA034693	474	437	648	151	172	145	2.47905	4.08165e-08	up	hypothetical protein OsI_34894 [Oryza sativa Indica Group]
BGIOSGA000932	935	1028	1187	365	371	453	2.00377	4.10453e-08	up	RecName: Full=Phospholipase A1-II 5
BGIOSGA012179	2963	3645	4530	1069	703	1472	2.63023	4.18554e-08	up	PREDICTED: phytosulfokines 4-like [Oryza sativa Japonica Group]
BGIOSGA002800	482	238	259	839	922	870	0.283833	4.21526e-08	down	hypothetical protein OsI_00427 [Oryza sativa Indica Group]
BGIOSGA028541	103	103	116	1	1	16	14.0745	4.25861e-08	up	hypothetical protein OsI_28978 [Oryza sativa Indica Group]
BGIOSGA031016	156	131	330	31	32	44	4.26113	4.26083e-08	up	hypothetical protein OsI_31878 [Oryza sativa Indica Group]
BGIOSGA005286	62	44	90	6	8	6	7.27064	4.29229e-08	up	hypothetical protein OsI_05430 [Oryza sativa Indica Group]
BGIOSGA029909	30	43	32	0	0	0	145.28	4.31963e-08	up	hypothetical protein OsI_31038 [Oryza sativa Indica Group]
BGIOSGA026791	650	886	2318	124	145	278	5.18994	4.35133e-08	up	H0323C08.13 [Oryza sativa Indica Group]
BGIOSGA018861	1383	1767	1225	3175	2451	2868	0.396723	4.40493e-08	down	hypothetical protein OsI_18343 [Oryza sativa Indica Group]
BGIOSGA009478	382	390	290	875	768	642	0.354649	4.42376e-08	down	hypothetical protein OsI_14255 [Oryza sativa Indica Group]
BGIOSGA031572	708	797	926	1149	1213	1717	0.452105	4.43758e-08	down	hypothetical protein OsI_34284 [Oryza sativa Indica Group]
BGIOSGA022436	89	75	88	8	16	6	6.2437	4.45399e-08	up	hypothetical protein OsI_21943 [Oryza sativa Indica Group]
BGIOSGA019234	1379	636	441	2547	3478	3423	0.200724	4.52238e-08	down	hypothetical protein OsI_18566 [Oryza sativa Indica Group]
BGIOSGA012568	222	229	284	381	412	657	0.385376	4.57348e-08	down	hypothetical protein OsI_11447 [Oryza sativa Indica Group]
BGIOSGA030985	460	365	1133	62	79	147	5.01716	4.58432e-08	up	hypothetical protein OsI_31798 [Oryza sativa Indica Group]
BGIOSGA029865	468	655	635	1335	844	1060	0.414185	4.60823e-08	down	hypothetical protein OsI_31156 [Oryza sativa Indica Group]
BGIOSGA014509	54	111	869	1	2	2	143.209	4.62963e-08	up	hypothetical protein OsI_17084 [Oryza sativa Indica Group]
BGIOSGA014062	13592	16316	19168	22472	23703	28675	0.494392	4.75409e-08	down	PREDICTED: oxalate--CoA ligase [Oryza sativa Japonica Group]
BGIOSGA005031	6429	3830	3288	11052	13309	11240	0.290274	4.79775e-08	down	PREDICTED: uncharacterized protein LOC4324318 [Oryza sativa Japonica Group]
BGIOSGA028594	2592	2814	2261	5130	4822	4223	0.411482	4.84402e-08	down	hypothetical protein OsI_29088 [Oryza sativa Indica Group]
BGIOSGA029288	1833	1623	1253	3683	3296	2881	0.365153	4.86677e-08	down	hypothetical protein OsJ_30297 [Oryza sativa Japonica Group]
BGIOSGA028091	44	21	16	101	112	114	0.190393	4.93273e-08	down	hypothetical protein OsI_28035 [Oryza sativa Indica Group]
BGIOSGA016225	207	224	331	55	72	67	2.9212	4.97928e-08	up	hypothetical protein OsI_15582 [Oryza sativa Indica Group]
BGIOSGA030879	88	19	188	1	0	1	107.811	5.00135e-08	up	RecName: Full=1-aminocyclopropane-1-carboxylate oxidase 1; Short=ACC oxidase 1; AltName: Full=Ethylene-forming enzyme; Short=EFE
BGIOSGA019152	97	97	119	173	186	219	0.408831	5.01885e-08	down	hypothetical protein OsI_18379 [Oryza sativa Indica Group]
BGIOSGA015900	1	1	2	28	31	26	0.0351413	5.02231e-08	down	hypothetical protein OsJ_13821 [Oryza sativa Japonica Group]
BGIOSGA027622	59	66	54	152	138	124	0.328379	5.1908e-08	down	hypothetical protein OsI_27886 [Oryza sativa Indica Group]
BGIOSGA005904	0	0	0	24	9	55	0.00495526	5.21264e-08	down	PREDICTED: probable aquaporin TIP2-1 [Oryza sativa Japonica Group]
BGIOSGA022154	59	32	144	1	0	6	25.102	5.22668e-08	up	hypothetical protein OsI_21323 [Oryza sativa Indica Group]
BGIOSGA011532	5380	3920	3672	8049	9488	8918	0.372918	5.34182e-08	down	PREDICTED: uncharacterized protein LOC4331491 [Oryza sativa Japonica Group]
BGIOSGA034647	1038	981	689	2031	2088	1789	0.350208	5.36308e-08	down	hypothetical protein OsI_34800 [Oryza sativa Indica Group]
BGIOSGA019592	1015	1050	1716	429	256	431	2.56161	5.4055e-08	up	PREDICTED: cathepsin B isoform X3 [Oryza sativa Japonica Group]
BGIOSGA030475	314	382	300	96	77	112	2.69115	5.41722e-08	up	hypothetical protein [Oryza sativa Japonica Group]
BGIOSGA030471	186	173	351	60	19	27	5.03429	5.55708e-08	up	hypothetical protein OsI_30782 [Oryza sativa Indica Group]
BGIOSGA017258	70	56	132	9	10	13	5.97718	5.61933e-08	up	OSIGBa0113E10.15 [Oryza sativa Indica Group]
BGIOSGA002924	5324	4558	5071	7934	7500	7322	0.497307	5.68043e-08	down	hypothetical protein OsI_00710 [Oryza sativa Indica Group]
BGIOSGA010085	144	129	446	36	24	33	5.64862	5.97352e-08	up	hypothetical protein OsI_12942 [Oryza sativa Indica Group]
EPlOING00000037545	42	18	54	0	0	0	153.439	5.98605e-08	up	.
BGIOSGA025665	88	108	41	248	269	287	0.228866	6.01507e-08	down	hypothetical protein OsI_25933 [Oryza sativa Indica Group]
BGIOSGA001940	93	39	107	9	6	9	7.48133	6.02989e-08	up	hypothetical protein OsI_01294 [Oryza sativa Indica Group]
BGIOSGA011354	165	165	276	57	45	42	3.13702	6.04457e-08	up	hypothetical protein OsI_10220 [Oryza sativa Indica Group]
BGIOSGA025378	42	34	90	1	4	1	20.0372	6.05571e-08	up	hypothetical protein OsI_25341 [Oryza sativa Indica Group]
BGIOSGA007489	2407	1786	709	7971	6703	5018	0.193611	6.08366e-08	down	PREDICTED: uncharacterized protein LOC4328240 [Oryza sativa Japonica Group]
BGIOSGA002752	471	356	449	711	711	698	0.45422	6.09464e-08	down	hypothetical protein OsI_00335 [Oryza sativa Indica Group]
BGIOSGA033046	47	55	42	114	127	341	0.193676	6.16068e-08	down	hypothetical protein OsI_33816 [Oryza sativa Indica Group]
BGIOSGA033387	1453	1118	3260	323	360	479	3.68256	6.23646e-08	up	hypothetical protein OsI_34517 [Oryza sativa Indica Group]
BGIOSGA025064	274	292	229	570	448	485	0.405516	6.2743e-08	down	hypothetical protein OsI_24719 [Oryza sativa Indica Group]
EPlOING00000046013	111	112	162	16	13	36	4.5225	6.29346e-08	up	.
BGIOSGA024528	32	43	27	0	0	0	141.973	6.37933e-08	up	hypothetical protein OsI_25522 [Oryza sativa Indica Group]
BGIOSGA003087	2851	2144	2025	4009	4866	5045	0.384123	6.39725e-08	down	hypothetical protein OsI_01055 [Oryza sativa Indica Group]
BGIOSGA021370	86	68	128	18	14	9	5.11086	6.39853e-08	up	hypothetical protein OsI_22696 [Oryza sativa Indica Group]
BGIOSGA020781	129	90	189	24	15	33	4.28232	6.55469e-08	up	hypothetical protein OsI_23905 [Oryza sativa Indica Group]
BGIOSGA002879	73	76	229	13	7	18	7.36523	6.55759e-08	up	hypothetical protein OsI_00620 [Oryza sativa Indica Group]
BGIOSGA022990	71	88	165	16	13	20	4.92765	6.56178e-08	up	hypothetical protein OsI_23127 [Oryza sativa Indica Group]
BGIOSGA025873	852	784	1310	180	262	323	2.86998	6.56699e-08	up	hypothetical protein OsI_26323 [Oryza sativa Indica Group]
BGIOSGA002221	723	660	1279	52	95	227	5.37802	6.66799e-08	up	hypothetical protein OsI_00725 [Oryza sativa Indica Group]
BGIOSGA027983	0	0	1	44	22	37	0.00802606	6.72908e-08	down	hypothetical protein OsI_27797 [Oryza sativa Indica Group]
BGIOSGA028204	55	29	25	0	0	0	152.316	6.839e-08	up	hypothetical protein OsI_28260 [Oryza sativa Indica Group]
BGIOSGA027485	86	34	54	0	0	4	33.8267	6.84347e-08	up	RecName: Full=Acyl-[acyl-carrier-protein] desaturase 6, chloroplastic; Flags: Precursor
BGIOSGA013702	50	67	74	3	7	10	7.2167	6.85454e-08	up	hypothetical protein OsI_13838 [Oryza sativa Indica Group]
BGIOSGA030683	42	43	71	5	0	4	13.1816	6.87175e-08	up	hypothetical protein OsI_31215 [Oryza sativa Indica Group]
BGIOSGA027832	445	555	282	1011	949	1332	0.303533	6.92819e-08	down	hypothetical protein OsI_27481 [Oryza sativa Indica Group]
BGIOSGA022196	0	0	0	34	9	32	0.00575288	6.9666e-08	down	hypothetical protein OsI_21413 [Oryza sativa Indica Group]
BGIOSGA031760	802	718	674	1123	1289	1462	0.431501	7.0524e-08	down	hypothetical protein OsI_33911 [Oryza sativa Indica Group]
BGIOSGA009043	594	970	1502	200	182	307	3.33555	7.07319e-08	up	hypothetical protein OsI_08920 [Oryza sativa Indica Group]
BGIOSGA005821	121	76	821	0	0	0	1291.53	7.1519e-08	up	PREDICTED: uncharacterized protein LOC4330358 [Oryza sativa Japonica Group]
BGIOSGA008180	2798	2256	2044	4222	4528	4435	0.410137	7.16897e-08	down	hypothetical protein OsI_07158 [Oryza sativa Indica Group]
BGIOSGA003885	370	364	553	150	129	131	2.34911	7.30478e-08	up	PREDICTED: uncharacterized protein LOC4326381 isoform X1 [Oryza sativa Japonica Group]
BGIOSGA028179	1	2	6	34	33	27	0.0706164	7.376e-08	down	hypothetical protein OsI_28216 [Oryza sativa Indica Group]
BGIOSGA004407	296	208	490	88	62	74	3.30182	7.39454e-08	up	PREDICTED: respiratory burst oxidase homolog protein A [Oryza sativa Japonica Group]
BGIOSGA002054	490	426	359	992	991	743	0.354717	7.5147e-08	down	hypothetical protein OsI_01059 [Oryza sativa Indica Group]
BGIOSGA023166	27	17	32	99	62	72	0.246357	7.60065e-08	down	hypothetical protein OsI_23524 [Oryza sativa Indica Group]
BGIOSGA007628	461	435	584	194	164	176	2.08832	7.60522e-08	up	PREDICTED: glyceraldehyde-3-phosphate dehydrogenase GAPCP1, chloroplastic [Oryza sativa Japonica Group]
BGIOSGA036222	0	0	0	17	24	21	0.00668141	7.62246e-08	down	hypothetical protein OsI_38268 [Oryza sativa Indica Group]
BGIOSGA024810	73	64	198	4	13	11	8.61236	7.67034e-08	up	PREDICTED: uncharacterized protein LOC4342415 [Oryza sativa Japonica Group]
BGIOSGA014165	2815	2695	2009	5831	5786	4445	0.356261	7.71148e-08	down	hypothetical protein OsI_17791 [Oryza sativa Indica Group]
BGIOSGA024779	3837	3227	2861	5492	6668	6735	0.399898	7.72253e-08	down	hypothetical protein OsI_24990 [Oryza sativa Indica Group]
EPlOING00000021087	96	29	64	0	0	1	133.285	7.78882e-08	up	.
BGIOSGA013989	430	32	116	6	9	10	17.8399	7.84273e-08	up	hypothetical protein OsI_14409 [Oryza sativa Indica Group]
BGIOSGA022958	225	230	94	708	410	805	0.226876	7.86977e-08	down	hypothetical protein OsI_23068 [Oryza sativa Indica Group]
BGIOSGA014735	57	84	238	5	0	13	15.9091	7.98673e-08	up	PREDICTED: peroxygenase [Oryza sativa Japonica Group]
BGIOSGA020832	431	404	1021	105	76	166	3.99581	7.98963e-08	up	PREDICTED: tryptophan synthase beta chain 2 isoform X1 [Oryza sativa Japonica Group]
BGIOSGA036889	0	0	0	37	30	9	0.00539942	8.01251e-08	down	hypothetical protein OsI_37235 [Oryza sativa Indica Group]
BGIOSGA027660	44	25	31	0	0	0	138.043	8.05613e-08	up	hypothetical protein OsI_27799 [Oryza sativa Indica Group]
BGIOSGA002458	134	180	703	16	23	47	8.57689	8.05616e-08	up	hypothetical protein OsI_00250 [Oryza sativa Indica Group]
BGIOSGA001263	16	35	18	87	72	87	0.215669	8.23862e-08	down	hypothetical protein OsI_02739 [Oryza sativa Indica Group]
BGIOSGA037214	1931	1770	1535	3303	3237	2904	0.421727	8.2424e-08	down	hypothetical protein OsI_37938 [Oryza sativa Indica Group]
BGIOSGA001681	3980	3674	3717	5747	5917	5840	0.492267	8.34555e-08	down	hypothetical protein OsI_01862 [Oryza sativa Indica Group]
BGIOSGA006353	117	135	395	11	6	36	9.1905	8.36128e-08	up	hypothetical protein OsI_07466 [Oryza sativa Indica Group]
BGIOSGA028122	67	60	119	6	5	16	6.88346	8.43472e-08	up	hypothetical protein OsI_28103 [Oryza sativa Indica Group]
BGIOSGA001845	1666	135	95	2	2	5	170.121	8.46212e-08	up	hypothetical protein OsI_01501 [Oryza sativa Indica Group]
BGIOSGA016319	6	14	0	68	48	133	0.0650699	8.49142e-08	down	H0209H04.8 [Oryza sativa Indica Group]
BGIOSGA005764	108	81	392	16	4	22	10.2592	8.60538e-08	up	hypothetical protein OsI_08632 [Oryza sativa Indica Group]
BGIOSGA009213	3971	3711	4000	1212	1327	1717	2.08877	8.74734e-08	up	hypothetical protein OsJ_08735 [Oryza sativa Japonica Group]
BGIOSGA009656	589	360	566	162	128	158	2.5636	9.03867e-08	up	hypothetical protein OsI_13874 [Oryza sativa Indica Group]
BGIOSGA019277	21	29	56	0	0	0	141.696	9.07282e-08	up	hypothetical protein OsI_18687 [Oryza sativa Indica Group]
BGIOSGA006842	91	85	10	511	361	445	0.112742	9.0917e-08	down	hypothetical protein OsI_06443 [Oryza sativa Indica Group]
BGIOSGA008387	48	18	37	109	86	180	0.211264	9.17057e-08	down	hypothetical protein OsI_07576 [Oryza sativa Indica Group]
BGIOSGA036032	807	1063	1395	282	214	421	2.7104	9.18671e-08	up	hypothetical protein OsI_38670 [Oryza sativa Indica Group]
BGIOSGA018851	1005	955	2791	210	185	399	4.43816	9.19845e-08	up	hypothetical protein OsI_18385 [Oryza sativa Indica Group]
BGIOSGA023706	63	58	86	140	131	272	0.290948	9.29453e-08	down	TPA_inf: WRKY transcription factor 47 [Oryza sativa (indica cultivar-group)] [Oryza sativa Indica Group]
BGIOSGA030750	1643	1553	1319	2726	2753	2545	0.428229	9.76304e-08	down	hypothetical protein OsI_31356 [Oryza sativa Indica Group]
BGIOSGA002155	977	838	912	284	320	343	2.18246	9.80024e-08	up	hypothetical protein [Oryza sativa Japonica Group]
BGIOSGA032492	128	121	126	259	205	213	0.420867	9.89495e-08	down	hypothetical protein OsI_32671 [Oryza sativa Indica Group]
BGIOSGA016653	284	229	527	85	77	69	3.31446	9.97002e-08	up	hypothetical protein OsI_16415 [Oryza sativa Indica Group]
BGIOSGA013846	419	460	529	186	148	190	2.03959	9.98688e-08	up	PREDICTED: hemK methyltransferase family member 2 [Oryza sativa Japonica Group]
BGIOSGA020416	4370	3327	3010	7829	7222	6255	0.382929	1.01641e-07	down	hypothetical protein OsI_21094 [Oryza sativa Indica Group]
BGIOSGA027348	193	184	202	292	294	358	0.465689	1.02165e-07	down	hypothetical protein OsI_28476 [Oryza sativa Indica Group]
BGIOSGA031386	831	959	1851	300	166	361	3.31955	1.02942e-07	up	PREDICTED: serine/threonine-protein kinase SAPK3 [Oryza sativa Japonica Group]
BGIOSGA036962	125	203	235	40	40	22	4.0932	1.04099e-07	up	hypothetical protein OsI_37409 [Oryza sativa Indica Group]
BGIOSGA004733	92	127	350	27	22	20	5.97732	1.04279e-07	up	hypothetical protein OsI_04294 [Oryza sativa Indica Group]
BGIOSGA011860	2468	2529	1980	4522	4152	3945	0.422313	1.05251e-07	down	hypothetical protein OsI_10013 [Oryza sativa Indica Group]
BGIOSGA012837	228	332	935	94	45	57	5.58135	1.05331e-07	up	hypothetical protein OsI_11975 [Oryza sativa Indica Group]
BGIOSGA031013	81	212	210	19	12	35	5.85035	1.05532e-07	up	hypothetical protein OsI_31874 [Oryza sativa Indica Group]
BGIOSGA000073	56	39	58	0	1	0	107.359	1.05565e-07	up	hypothetical protein OsI_05294 [Oryza sativa Indica Group]
BGIOSGA027538	93	162	81	7	7	22	7.35508	1.0558e-07	up	hypothetical protein OsI_28062 [Oryza sativa Indica Group]
BGIOSGA012159	5369	4587	2724	10605	9411	10766	0.319749	1.05697e-07	down	hypothetical protein OsI_10595 [Oryza sativa Indica Group]
BGIOSGA010372	60	53	104	6	3	13	7.47821	1.06545e-07	up	hypothetical protein OsI_12364 [Oryza sativa Indica Group]
BGIOSGA016513	36	50	68	129	91	159	0.308403	1.07159e-07	down	hypothetical protein OsI_16106 [Oryza sativa Indica Group]
BGIOSGA005694	1097	691	614	2560	2115	1558	0.294238	1.0716e-07	down	hypothetical protein OsI_08780 [Oryza sativa Indica Group]
BGIOSGA006149	2321	3350	2068	768	663	547	2.99254	1.08124e-07	up	hypothetical protein OsI_07863 [Oryza sativa Indica Group]
BGIOSGA000764	723	586	530	1137	1238	1128	0.399034	1.08201e-07	down	hypothetical protein OsI_03852 [Oryza sativa Indica Group]
BGIOSGA035840	239	178	354	65	33	72	3.43927	1.08562e-07	up	hypothetical protein OsI_39101 [Oryza sativa Indica Group]
BGIOSGA008602	7	4	5	33	42	30	0.114122	1.10559e-07	down	hypothetical protein OsI_08020 [Oryza sativa Indica Group]
BGIOSGA009517	1	0	0	31	19	54	0.00803005	1.11356e-07	down	PREDICTED: cell number regulator 10 [Oryza sativa Japonica Group]
BGIOSGA017278	522	432	373	744	987	1037	0.365316	1.11559e-07	down	hypothetical protein [Oryza sativa Japonica Group]
BGIOSGA016975	2238	1020	1118	3716	5142	3929	0.259128	1.11904e-07	down	PREDICTED: beta-carotene hydroxylase 2, chloroplastic [Oryza sativa Japonica Group]
BGIOSGA004061	1358	1437	1471	352	379	610	2.43565	1.12347e-07	up	hypothetical protein OsI_02982 [Oryza sativa Indica Group]
BGIOSGA025530	1333	1014	803	2286	2238	2158	0.361325	1.14407e-07	down	hypothetical protein OsI_25661 [Oryza sativa Indica Group]
BGIOSGA013950	89	21	91	3	0	4	21.9045	1.16017e-07	up	hypothetical protein OsI_14341 [Oryza sativa Indica Group]
BGIOSGA021037	25	33	34	0	0	0	126.041	1.16488e-07	up	hypothetical protein OsI_23377 [Oryza sativa Indica Group]
BGIOSGA026448	461	104	138	1038	1503	1027	0.149843	1.16529e-07	down	PREDICTED: omega-3 fatty acid desaturase, chloroplastic [Oryza sativa Japonica Group]
BGIOSGA023082	748	608	854	1021	1165	1449	0.458508	1.1698e-07	down	PREDICTED: amino acid permease 3 [Oryza sativa Japonica Group]
BGIOSGA013033	47	36	75	1	0	0	109.278	1.17561e-07	up	hypothetical protein OsI_12414 [Oryza sativa Indica Group]
BGIOSGA011707	186	128	187	38	36	51	3.04214	1.18644e-07	up	hypothetical protein OsI_09722 [Oryza sativa Indica Group]
BGIOSGA009908	378	584	826	153	99	187	3.0819	1.18986e-07	up	PREDICTED: monoglyceride lipase [Oryza sativa Japonica Group]
BGIOSGA022466	90	107	72	192	171	281	0.323775	1.20142e-07	down	hypothetical protein OsI_22007 [Oryza sativa Indica Group]
BGIOSGA035797	34	20	42	0	0	0	130.023	1.27125e-07	up	hypothetical protein OsI_39192 [Oryza sativa Indica Group]
BGIOSGA017190	593	410	855	1053	1215	1348	0.381445	1.27892e-07	down	hypothetical protein OsI_17535 [Oryza sativa Indica Group]
BGIOSGA000642	170	156	186	49	47	36	2.91834	1.29185e-07	up	hypothetical protein OsI_04100 [Oryza sativa Indica Group]
BGIOSGA006655	2	5	2	31	37	24	0.0735956	1.32558e-07	down	hypothetical protein OsI_06833 [Oryza sativa Indica Group]
BGIOSGA029497	944	527	423	109	137	126	3.90509	1.35311e-07	up	hypothetical protein OsI_31923 [Oryza sativa Indica Group]
BGIOSGA027363	8	4	2	50	23	43	0.0944096	1.35399e-07	down	hypothetical protein OsI_28450 [Oryza sativa Indica Group]
BGIOSGA009780	184	441	2147	22	24	16	31.0873	1.39478e-07	up	hypothetical protein OsI_13605 [Oryza sativa Indica Group]
BGIOSGA031544	440	366	415	648	799	704	0.426843	1.40595e-07	down	hypothetical protein OsI_34338 [Oryza sativa Indica Group]
BGIOSGA001215	26	16	6	69	84	89	0.153637	1.40608e-07	down	hypothetical protein OsI_02846 [Oryza sativa Indica Group]
BGIOSGA024954	14	45	50	0	0	0	147.419	1.41985e-07	up	PREDICTED: uncharacterized protein LOC4342221 [Oryza sativa Japonica Group]
BGIOSGA026251	31	29	29	0	0	0	122.654	1.42248e-07	up	hypothetical protein OsI_27081 [Oryza sativa Indica Group]
BGIOSGA004801	248	307	379	108	85	78	2.58819	1.42631e-07	up	PREDICTED: delta-1-pyrroline-5-carboxylate synthase-like [Oryza sativa Japonica Group]
BGIOSGA000500	121	107	254	19	21	38	4.59842	1.44714e-07	up	hypothetical protein OsI_04407 [Oryza sativa Indica Group]
BGIOSGA035921	27	32	30	0	0	0	122.499	1.44966e-07	up	hypothetical protein OsI_38921 [Oryza sativa Indica Group]
BGIOSGA027872	524	637	1605	165	131	225	3.92217	1.46938e-07	up	hypothetical protein OsI_27575 [Oryza sativa Indica Group]
BGIOSGA014831	1095	1125	1320	1619	1915	1879	0.490984	1.47427e-07	down	PREDICTED: serine/threonine-protein kinase OXI1 [Oryza sativa Japonica Group]
BGIOSGA008253	1754	1581	1646	2604	2621	2473	0.489591	1.4752e-07	down	hypothetical protein OsI_07305 [Oryza sativa Indica Group]
BGIOSGA012437	433	210	224	38	44	72	4.36159	1.48348e-07	up	PREDICTED: probable galacturonosyltransferase-like 7 [Oryza sativa Japonica Group]
BGIOSGA008986	376	397	611	144	126	174	2.34312	1.49683e-07	up	hypothetical protein OsI_08814 [Oryza sativa Indica Group]
BGIOSGA008892	6	4	2	35	29	30	0.0977681	1.50646e-07	down	hypothetical protein OsI_08633 [Oryza sativa Indica Group]
BGIOSGA018873	169	130	228	6	21	37	6.19314	1.51043e-07	up	hypothetical protein OsI_18326 [Oryza sativa Indica Group]
BGIOSGA011567	595	177	957	25	46	98	7.59388	1.51383e-07	up	hypothetical protein OsI_09758 [Oryza sativa Indica Group]
BGIOSGA027893	43	39	18	0	0	0	140.932	1.52157e-07	up	hypothetical protein OsI_27617 [Oryza sativa Indica Group]
BGIOSGA027741	125	129	151	38	34	29	3.02216	1.52296e-07	up	hypothetical protein OsI_27633 [Oryza sativa Indica Group]
BGIOSGA013419	948	866	750	1531	1484	1442	0.438508	1.53521e-07	down	hypothetical protein OsI_13211 [Oryza sativa Indica Group]
BGIOSGA015951	53	31	23	163	170	90	0.191692	1.55612e-07	down	hypothetical protein OsI_14968 [Oryza sativa Indica Group]
BGIOSGA026984	709	562	506	1213	1310	1048	0.377254	1.56091e-07	down	hypothetical protein OsI_29220 [Oryza sativa Indica Group]
BGIOSGA037196	448	418	714	183	141	179	2.35506	1.57149e-07	up	hypothetical protein OsI_37900 [Oryza sativa Indica Group]
BGIOSGA032895	185	160	146	372	295	287	0.392765	1.57218e-07	down	hypothetical protein OsI_33533 [Oryza sativa Indica Group]
BGIOSGA013503	92	27	58	1	4	0	26.1926	1.58932e-07	up	hypothetical protein OsI_13387 [Oryza sativa Indica Group]
BGIOSGA014249	154	117	43	12	9	5	9.40866	1.61457e-07	up	hypothetical protein OsI_17617 [Oryza sativa Indica Group]
BGIOSGA027896	490	335	233	956	970	832	0.294502	1.62538e-07	down	PREDICTED: probable adenylate kinase 7, mitochondrial [Oryza sativa Japonica Group]
BGIOSGA032264	537	863	719	224	179	138	2.96173	1.65153e-07	up	hypothetical protein OsI_32807 [Oryza sativa Indica Group]
BGIOSGA005166	107	151	102	245	228	407	0.317364	1.65628e-07	down	PREDICTED: probable glutathione S-transferase [Oryza sativa Japonica Group]
BGIOSGA005230	277	186	576	78	46	64	4.08836	1.66345e-07	up	TPA: class III peroxidase 20 precursor [Oryza sativa Japonica Group]
BGIOSGA024252	751	891	1474	347	240	339	2.5233	1.66378e-07	up	PREDICTED: transmembrane protein 184 homolog DDB_G0279555 [Oryza sativa Japonica Group]
BGIOSGA021643	741	636	2264	162	137	271	4.69872	1.67656e-07	up	hypothetical protein OsI_22202 [Oryza sativa Indica Group]
BGIOSGA023535	55	85	93	13	1	8	8.17221	1.70291e-07	up	hypothetical protein OsI_24319 [Oryza sativa Indica Group]
BGIOSGA010577	1177	1027	768	2487	1955	1811	0.36503	1.70563e-07	down	hypothetical protein OsJ_11169 [Oryza sativa Japonica Group]
BGIOSGA011911	120	114	163	32	34	26	3.22255	1.71587e-07	up	hypothetical protein OsI_10115 [Oryza sativa Indica Group]
BGIOSGA016281	0	1	2	38	34	18	0.0246188	1.71879e-07	down	hypothetical protein OsI_15671 [Oryza sativa Indica Group]
BGIOSGA024224	0	0	0	17	15	25	0.00741373	1.72849e-07	down	hypothetical protein OsI_26197 [Oryza sativa Indica Group]
BGIOSGA020616	212	176	136	17	20	48	4.81958	1.74251e-07	up	PREDICTED: uncharacterized protein LOC4341927 [Oryza sativa Japonica Group]
BGIOSGA037523	40	37	102	0	1	1	65.5493	1.75616e-07	up	hypothetical protein OsI_38605 [Oryza sativa Indica Group]
BGIOSGA007754	65	23	57	2	2	1	21.7509	1.77342e-07	up	PREDICTED: cyanidin 3-O-rutinoside 5-O-glucosyltransferase [Oryza sativa Japonica Group]
BGIOSGA015276	31	29	27	0	0	0	120.174	1.78807e-07	up	PREDICTED: L-gulonolactone oxidase 5 [Oryza sativa Japonica Group]
BGIOSGA015278	30	33	25	0	0	0	122.069	1.80226e-07	up	hypothetical protein OsI_15496 [Oryza sativa Indica Group]
BGIOSGA026970	76	44	172	13	2	5	10.8446	1.80637e-07	up	hypothetical protein OsI_29246 [Oryza sativa Indica Group]
BGIOSGA011223	130	94	235	26	12	34	4.80838	1.82399e-07	up	PREDICTED: probable leucine-rich repeat receptor-like protein kinase At1g35710 [Oryza sativa Japonica Group]
BGIOSGA024155	57	39	36	102	102	171	0.27199	1.82591e-07	down	hypothetical protein OsI_26355 [Oryza sativa Indica Group]
BGIOSGA010463	4270	3752	4587	5566	6816	8991	0.447065	1.84299e-07	down	hypothetical protein OsI_12198 [Oryza sativa Indica Group]
BGIOSGA008343	409	331	784	105	111	144	3.13199	1.85145e-07	up	hypothetical protein OsI_07481 [Oryza sativa Indica Group]
BGIOSGA026249	1732	1660	1776	767	542	573	2.08954	1.85208e-07	up	hypothetical protein OsI_27078 [Oryza sativa Indica Group]
BGIOSGA008436	185	150	91	443	457	316	0.267725	1.85926e-07	down	hypothetical protein OsI_07675 [Oryza sativa Indica Group]
BGIOSGA024204	28	59	101	2	0	0	69.7344	1.86209e-07	up	PREDICTED: alpha-amylase/trypsin inhibitor [Oryza sativa Japonica Group]
BGIOSGA016094	463	500	352	143	57	82	3.63573	1.86425e-07	up	hypothetical protein OsI_15270 [Oryza sativa Indica Group]
BGIOSGA012950	661	88	106	3	6	4	50.6445	1.86838e-07	up	hypothetical protein OsI_12197 [Oryza sativa Indica Group]
BGIOSGA002516	29	28	29	0	0	0	118.327	1.86941e-07	up	hypothetical protein OsI_00134 [Oryza sativa Indica Group]
BGIOSGA017934	0	0	0	20	21	15	0.00739274	1.89504e-07	down	hypothetical protein OsI_20185 [Oryza sativa Indica Group]
BGIOSGA028625	13	12	18	50	61	45	0.20492	1.90497e-07	down	PREDICTED: uncharacterized protein LOC4345509 [Oryza sativa Japonica Group]
BGIOSGA004012	68	74	130	17	4	3	8.5026	1.91882e-07	up	hypothetical protein OsI_02900 [Oryza sativa Indica Group]
BGIOSGA036656	26	36	26	0	0	0	121.916	1.93747e-07	up	hypothetical protein OsI_37426 [Oryza sativa Indica Group]
BGIOSGA010848	13505	7285	7338	23778	18275	23139	0.333525	1.94968e-07	down	hypothetical protein OsI_11332 [Oryza sativa Indica Group]
BGIOSGA004711	8088	7629	2963	20777	21613	18351	0.238633	1.95465e-07	down	PREDICTED: uncharacterized protein LOC4327573 [Oryza sativa Japonica Group]
BGIOSGA004349	5717	3765	3225	9933	9737	8634	0.343405	1.95815e-07	down	hypothetical protein OsJ_03276 [Oryza sativa Japonica Group]
BGIOSGA025811	891	1103	2956	202	298	341	4.26283	1.96312e-07	up	hypothetical protein OsI_26203 [Oryza sativa Indica Group]
BGIOSGA006198	210	207	162	398	368	949	0.264956	1.96861e-07	down	PREDICTED: uncharacterized protein LOC101763013 [Setaria italica]
BGIOSGA027364	0	1	6	27	23	62	0.046756	1.98202e-07	down	hypothetical protein OsI_28449 [Oryza sativa Indica Group]
BGIOSGA026938	3592	3730	2222	6653	7515	7164	0.343659	1.99826e-07	down	PREDICTED: ATP-dependent Clp protease adapter protein CLPS1, chloroplastic [Oryza sativa Japonica Group]
BGIOSGA015061	129	11	202	5	0	3	31.9877	2.0183e-07	up	hypothetical protein OsI_15976 [Oryza sativa Indica Group]
BGIOSGA015013	9626	8812	8203	13367	16978	16273	0.432853	2.03795e-07	down	hypothetical protein OsI_16052 [Oryza sativa Indica Group]
BGIOSGA001060	281	369	805	94	63	124	3.85938	2.04634e-07	up	hypothetical protein OsI_03191 [Oryza sativa Indica Group]
BGIOSGA022236	1453	1478	872	2901	2704	2807	0.349077	2.04645e-07	down	hypothetical protein OsI_21486 [Oryza sativa Indica Group]
BGIOSGA027559	335	251	390	563	478	519	0.470846	2.08193e-07	down	hypothetical protein OsI_28022 [Oryza sativa Indica Group]
EPlOING00000004231	356	318	307	499	584	630	0.435134	2.08923e-07	down	.
BGIOSGA015961	2041	1780	4239	535	497	867	3.16196	2.10457e-07	up	OSJNBa0059D20.11 [Oryza sativa Japonica Group]
BGIOSGA020728	1428	845	1336	1873	2761	3003	0.354715	2.10767e-07	down	PREDICTED: probable Xaa-Pro aminopeptidase P [Oryza sativa Japonica Group]
BGIOSGA013782	113	47	86	6	11	11	6.62177	2.11062e-07	up	hypothetical protein OsI_13988 [Oryza sativa Indica Group]
BGIOSGA024834	213	182	185	354	319	322	0.44302	2.11086e-07	down	hypothetical protein OsI_24870 [Oryza sativa Indica Group]
BGIOSGA026145	305	167	237	474	402	610	0.365528	2.11225e-07	down	hypothetical protein OsI_26880 [Oryza sativa Indica Group]
BGIOSGA000326	54	23	66	2	1	3	17.9275	2.14315e-07	up	PREDICTED: formin-like protein 1 [Oryza sativa Japonica Group]
BGIOSGA014666	277	345	456	122	68	118	2.66059	2.17226e-07	up	PREDICTED: thioredoxin M2, chloroplastic [Oryza sativa Japonica Group]
BGIOSGA023491	595	722	1006	279	244	272	2.18898	2.1905e-07	up	hypothetical protein OsI_24230 [Oryza sativa Indica Group]
BGIOSGA026849	3357	3975	6597	1498	873	1596	2.65297	2.2614e-07	up	hypothetical protein OsI_29517 [Oryza sativa Indica Group]
BGIOSGA018766	106	177	481	20	24	44	6.35315	2.26266e-07	up	PREDICTED: non-specific lipid-transfer protein [Oryza sativa Japonica Group]
BGIOSGA002265	1123	962	741	1992	1654	1801	0.399343	2.27015e-07	down	PREDICTED: aspartate aminotransferase [Oryza sativa Japonica Group]
BGIOSGA027114	228	152	203	23	33	59	3.87629	2.27116e-07	up	hypothetical protein OsI_28939 [Oryza sativa Indica Group]
BGIOSGA007327	1246	488	1243	188	200	254	3.47946	2.29424e-07	up	hypothetical protein OsI_05462 [Oryza sativa Indica Group]
BGIOSGA016997	37	78	57	5	6	5	8.15841	2.34403e-07	up	hypothetical protein OsI_17150 [Oryza sativa Indica Group]
BGIOSGA016611	396	524	401	770	750	804	0.433769	2.35134e-07	down	hypothetical protein OsI_16332 [Oryza sativa Indica Group]
BGIOSGA017159	32	45	45	1	3	1	18.303	2.51243e-07	up	hypothetical protein OsI_17469 [Oryza sativa Indica Group]
BGIOSGA031562	170	53	92	8	11	15	7.09283	2.56505e-07	up	hypothetical protein OsI_34299 [Oryza sativa Indica Group]
BGIOSGA020439	4705	4100	2078	12477	11792	7939	0.25981	2.60888e-07	down	hypothetical protein OsI_21146 [Oryza sativa Indica Group]
BGIOSGA014723	4023	3262	6488	1320	730	1601	2.86302	2.63812e-07	up	PREDICTED: beta-glucosidase 16 isoform X3 [Oryza sativa Japonica Group]
BGIOSGA010992	0	0	0	20	10	29	0.0072714	2.64229e-07	down	PREDICTED: glycine-rich RNA-binding protein 4, mitochondrial [Oryza sativa Japonica Group]
BGIOSGA026540	129	52	90	14	1	4	11.0773	2.64668e-07	up	hypothetical protein OsI_30134 [Oryza sativa Indica Group]
BGIOSGA027541	1939	1610	1620	2577	2623	2984	0.481433	2.65818e-07	down	hypothetical protein OsI_28059 [Oryza sativa Indica Group]
BGIOSGA026169	34	41	58	5	1	1	14.3276	2.68192e-07	up	hypothetical protein OsI_26925 [Oryza sativa Indica Group]
BGIOSGA014519	220	23	30	3	0	1	54.6692	2.69967e-07	up	hypothetical protein OsI_17052 [Oryza sativa Indica Group]
BGIOSGA000215	936	1052	2006	391	278	431	2.71423	2.70998e-07	up	PREDICTED: transaldolase [Oryza sativa Japonica Group]
BGIOSGA022460	17	16	34	53	73	132	0.194897	2.73728e-07	down	PREDICTED: RING-H2 finger protein ATL3 [Oryza sativa Japonica Group]
BGIOSGA034952	854	975	1268	433	287	408	2.08171	2.75549e-07	up	PREDICTED: aldehyde dehydrogenase family 3 member H1 [Oryza sativa Japonica Group]
BGIOSGA016947	85	106	85	209	196	716	0.194275	2.78907e-07	down	PREDICTED: protein DETOXIFICATION 49 [Oryza sativa Japonica Group]
BGIOSGA023677	930	824	1322	422	296	333	2.19849	2.83577e-07	up	hypothetical protein OsI_27420 [Oryza sativa Indica Group]
BGIOSGA010150	109	202	71	13	9	23	6.737	2.84031e-07	up	hypothetical protein OsI_12792 [Oryza sativa Indica Group]
BGIOSGA002793	0	0	0	17	12	27	0.00760865	2.85864e-07	down	hypothetical protein OsI_00420 [Oryza sativa Indica Group]
BGIOSGA015268	29	26	27	0	0	0	112.942	2.85902e-07	up	hypothetical protein OsI_15520 [Oryza sativa Indica Group]
BGIOSGA013524	48670	38073	31973	87241	84243	68543	0.376818	2.92238e-07	down	PREDICTED: serine hydroxymethyltransferase, mitochondrial [Oryza sativa Japonica Group]
BGIOSGA014852	40	31	50	118	79	90	0.318327	2.9334e-07	down	hypothetical protein OsI_16362 [Oryza sativa Indica Group]
BGIOSGA031994	820	882	339	2775	2342	1657	0.233395	2.97126e-07	down	putative protein-tyrosine-phosphatase [Oryza sativa Japonica Group]
BGIOSGA013887	4671	4065	2607	10293	9178	7304	0.325188	2.9866e-07	down	PREDICTED: translocase of chloroplast 159, chloroplastic [Oryza sativa Japonica Group]
BGIOSGA008876	930	702	1020	327	313	330	2.05795	3.00997e-07	up	hypothetical protein OsI_08591 [Oryza sativa Indica Group]
BGIOSGA037111	647	528	543	960	846	920	0.480345	3.01858e-07	down	hypothetical protein OsI_37720 [Oryza sativa Indica Group]
BGIOSGA036377	0	0	0	16	18	18	0.00801291	3.11421e-07	down	hypothetical protein OsI_37979 [Oryza sativa Indica Group]
BGIOSGA002123	286	129	233	27	30	59	4.27694	3.13246e-07	up	PREDICTED: protein trichome birefringence-like 41 isoform X2 [Oryza sativa Japonica Group]
BGIOSGA011126	321	194	315	466	545	557	0.397222	3.14143e-07	down	hypothetical protein OsI_10727 [Oryza sativa Indica Group]
BGIOSGA017854	202	198	268	69	35	75	2.85483	3.15017e-07	up	PREDICTED: mucin-5AC [Oryza sativa Japonica Group]
BGIOSGA010029	3045	2234	4006	1091	946	1225	2.13839	3.15898e-07	up	hypothetical protein OsI_13072 [Oryza sativa Indica Group]
BGIOSGA000563	3399	2309	1433	7549	6742	5474	0.278613	3.16107e-07	down	PREDICTED: uncharacterized protein LOC4327520 [Oryza sativa Japonica Group]
BGIOSGA000911	888	987	1373	293	244	464	2.46771	3.18711e-07	up	PREDICTED: probable choline kinase 2 [Oryza sativa Japonica Group]
EPlOING00000037370	31	34	20	0	0	0	118.787	3.2295e-07	up	.
BGIOSGA035986	1220	1316	2492	483	145	355	3.88762	3.2557e-07	up	hypothetical protein OsI_38769 [Oryza sativa Indica Group]
BGIOSGA035879	96	92	157	30	15	25	3.71835	3.28281e-07	up	PREDICTED: tetratricopeptide repeat protein 1 isoform X1 [Oryza sativa Japonica Group]
BGIOSGA014838	43	53	37	1	0	0	94.8335	3.30445e-07	up	hypothetical protein OsI_16389 [Oryza sativa Indica Group]
BGIOSGA005185	12	19	12	46	43	385	0.0733107	3.32357e-07	down	PREDICTED: uncharacterized protein LOC4325751 [Oryza sativa Japonica Group]
BGIOSGA006327	20	26	38	0	0	0	113.65	3.32844e-07	up	hypothetical protein OsI_07505 [Oryza sativa Indica Group]
BGIOSGA009140	105	93	146	17	24	31	3.58558	3.3617e-07	up	hypothetical protein OsI_09158 [Oryza sativa Indica Group]
BGIOSGA036243	120	47	109	14	9	3	7.92114	3.36722e-07	up	Os12g0454600 [Oryza sativa Japonica Group]
BGIOSGA012569	1533	1370	1181	2869	2404	2151	0.41967	3.38111e-07	down	Os03g0334700, partial [Oryza sativa Japonica Group]
BGIOSGA002992	272	449	539	74	53	140	3.6168	3.40327e-07	up	PREDICTED: uncharacterized protein LOC4325256 [Oryza sativa Japonica Group]
BGIOSGA008486	129	128	71	317	243	263	0.308769	3.44168e-07	down	hypothetical protein OsI_07790 [Oryza sativa Indica Group]
BGIOSGA034624	32	37	92	3	2	5	11.9259	3.44188e-07	up	PREDICTED: CBL-interacting protein kinase 15 [Oryza sativa Japonica Group]
BGIOSGA031061	83	76	64	11	14	10	4.84133	3.44927e-07	up	hypothetical protein OsI_31979 [Oryza sativa Indica Group]
BGIOSGA017047	30	39	78	3	0	0	36.4454	3.45604e-07	up	hypothetical protein OsI_17248 [Oryza sativa Indica Group]
BGIOSGA003091	1738	1396	1573	2673	3094	2425	0.431461	3.4583e-07	down	hypothetical protein OsI_01062 [Oryza sativa Indica Group]
BGIOSGA027260	244	285	273	98	64	59	2.75972	3.45911e-07	up	hypothetical protein OsI_28638 [Oryza sativa Indica Group]
BGIOSGA017925	48	59	187	1	3	12	13.5966	3.48604e-07	up	hypothetical protein OsI_20203 [Oryza sativa Indica Group]
BGIOSGA020667	112	140	247	43	29	27	3.74018	3.48841e-07	up	PREDICTED: early nodulin-like protein 1 [Oryza sativa Japonica Group]
BGIOSGA006093	25109	21429	15918	55207	47141	35616	0.345943	3.55685e-07	down	PREDICTED: 4-hydroxy-3-methylbut-2-en-1-yl diphosphate synthase (ferredoxin), chloroplastic [Oryza sativa Japonica Group]
BGIOSGA008886	560	425	942	135	116	221	3.06787	3.56282e-07	up	hypothetical protein OsI_08616 [Oryza sativa Indica Group]
BGIOSGA019768	542	394	432	788	726	783	0.453488	3.56315e-07	down	hypothetical protein OsI_19769 [Oryza sativa Indica Group]
BGIOSGA016747	6394	5194	3041	12008	13148	11444	0.307517	3.56324e-07	down	PREDICTED: ammonium transporter 1 member 1 [Oryza sativa Japonica Group]
BGIOSGA031283	49	38	37	94	88	106	0.328757	3.57348e-07	down	hypothetical protein OsI_32424 [Oryza sativa Indica Group]
BGIOSGA022142	46	56	59	108	102	115	0.374891	3.59649e-07	down	hypothetical protein OsI_21299 [Oryza sativa Indica Group]
BGIOSGA009318	26	48	75	2	4	3	12.2033	3.60499e-07	up	PREDICTED: U-box domain-containing protein 33 isoform X1 [Oryza sativa Japonica Group]
BGIOSGA020460	9213	6372	5538	14067	14581	14217	0.37706	3.61021e-07	down	hypothetical protein OsI_21178 [Oryza sativa Indica Group]
BGIOSGA009226	800	586	635	208	171	269	2.40049	3.62266e-07	up	hypothetical protein OsI_09318 [Oryza sativa Indica Group]
BGIOSGA018439	26	50	50	2	0	2	24.058	3.64346e-07	up	PREDICTED: xylanase inhibitor protein 2-like [Oryza sativa Japonica Group]
BGIOSGA027612	1863	657	855	222	143	264	4.19289	3.67382e-07	up	PREDICTED: probable mixed-linked glucan synthase 6 [Oryza sativa Japonica Group]
BGIOSGA017057	83	16	75	2	2	0	32.153	3.67854e-07	up	hypothetical protein OsI_17271 [Oryza sativa Indica Group]
BGIOSGA016808	4	1	1	23	20	41	0.0553588	3.70381e-07	down	PREDICTED: lanC-like protein GCL2 [Oryza sativa Japonica Group]
BGIOSGA000147	191	150	289	62	48	43	3.06436	3.71635e-07	up	hypothetical protein OsI_05125 [Oryza sativa Indica Group]
BGIOSGA018021	397	168	263	71	42	53	3.82546	3.73342e-07	up	hypothetical protein OsI_20036 [Oryza sativa Indica Group]
BGIOSGA006841	35	21	5	112	96	128	0.143238	3.7448e-07	down	hypothetical protein OsI_06444 [Oryza sativa Indica Group]
BGIOSGA007845	80	89	46	220	213	165	0.275558	3.75646e-07	down	hypothetical protein OsI_06477 [Oryza sativa Indica Group]
BGIOSGA018966	821	933	1215	323	298	445	2.10806	3.76644e-07	up	PREDICTED: V-type proton ATPase 16 kDa proteolipid subunit [Oryza sativa Japonica Group]
EPlOING00000039216	0	0	0	26	15	13	0.00776061	3.81176e-07	down	.
EPlOING00000002041	19	23	45	0	0	0	116.507	3.82966e-07	up	.
BGIOSGA012249	25	40	134	0	1	1	71.5053	3.84764e-07	up	hypothetical protein OsI_10787 [Oryza sativa Indica Group]
BGIOSGA007459	528	390	349	848	908	785	0.379267	3.86234e-07	down	PREDICTED: uncharacterized protein LOC4328186 [Oryza sativa Japonica Group]
BGIOSGA005806	1504	1666	3122	450	468	750	2.81643	3.86498e-07	up	hypothetical protein OsI_08542 [Oryza sativa Indica Group]
BGIOSGA010486	341	209	374	96	66	96	2.7136	3.89037e-07	up	hypothetical protein OsI_12155 [Oryza sativa Indica Group]
BGIOSGA026275	3	5	1	31	29	25	0.0809495	3.93614e-07	down	hypothetical protein OsI_27121 [Oryza sativa Indica Group]
BGIOSGA014092	407	531	687	185	114	200	2.476	3.95883e-07	up	hypothetical protein OsI_17918 [Oryza sativa Indica Group]
EPlOING00000002518	30	41	58	3	2	4	10.7945	3.96061e-07	up	.
BGIOSGA013063	2694	2246	1196	5526	4960	5224	0.303446	4.01907e-07	down	hypothetical protein OsI_12472 [Oryza sativa Indica Group]
BGIOSGA004032	70	44	41	125	117	143	0.309057	4.07241e-07	down	hypothetical protein OsI_02939 [Oryza sativa Indica Group]
BGIOSGA033189	1805	1500	4173	495	538	658	3.23912	4.08865e-07	up	hypothetical protein OsI_34152 [Oryza sativa Indica Group]
BGIOSGA011504	24	19	41	0	0	0	112.949	4.11011e-07	up	hypothetical protein OsI_09891 [Oryza sativa Indica Group]
BGIOSGA020682	529	397	667	201	118	176	2.43914	4.1185e-07	up	RecName: Full=Auxin response factor 17
BGIOSGA019015	376	244	259	612	459	628	0.398361	4.12083e-07	down	hypothetical protein OsI_18120 [Oryza sativa Indica Group]
BGIOSGA023786	647	570	1059	269	210	244	2.34957	4.1221e-07	up	hypothetical protein OsI_27180 [Oryza sativa Indica Group]
BGIOSGA023550	2510	1909	1426	5118	4444	3613	0.339953	4.14556e-07	down	hypothetical protein OsI_24347 [Oryza sativa Indica Group]
BGIOSGA010419	1	1	5	35	35	18	0.057905	4.16132e-07	down	hypothetical protein OsI_12289 [Oryza sativa Indica Group]
BGIOSGA004412	1255	1324	1015	1946	2011	2253	0.443311	4.176e-07	down	hypothetical protein OsI_03648 [Oryza sativa Indica Group]
BGIOSGA013235	68	30	52	101	167	193	0.245288	4.2071e-07	down	PREDICTED: plant cysteine oxidase 2 [Oryza sativa Japonica Group]
BGIOSGA006796	586	796	609	1444	997	1155	0.425106	4.21703e-07	down	hypothetical protein OsI_06546 [Oryza sativa Indica Group]
BGIOSGA029738	137	188	363	47	44	51	3.57634	4.28503e-07	up	hypothetical protein OsI_31419 [Oryza sativa Indica Group]
BGIOSGA026469	28	34	79	3	0	2	21.0269	4.28891e-07	up	hypothetical protein OsI_30307 [Oryza sativa Indica Group]
BGIOSGA029654	401	291	2962	27	17	41	30.7614	4.29083e-07	up	hypothetical protein OsI_31599 [Oryza sativa Indica Group]
BGIOSGA002224	77	96	167	19	8	26	4.86285	4.31027e-07	up	hypothetical protein OsI_00720 [Oryza sativa Indica Group]
BGIOSGA029938	172	145	290	45	36	63	3.16595	4.38257e-07	up	PREDICTED: protein SAWADEE HOMEODOMAIN HOMOLOG 1 [Oryza sativa Japonica Group]
BGIOSGA013493	33	37	84	5	3	3	10.3347	4.38926e-07	up	hypothetical protein OsI_13359 [Oryza sativa Indica Group]
BGIOSGA006033	1119	656	551	1843	1695	1924	0.328811	4.42578e-07	down	hypothetical protein OsI_08088 [Oryza sativa Indica Group]
BGIOSGA019146	1079	1302	3180	266	331	496	3.7373	4.53066e-07	up	hypothetical protein OsI_18372 [Oryza sativa Indica Group]
BGIOSGA005824	26	46	28	129	78	90	0.259158	4.53105e-07	down	hypothetical protein OsI_08508 [Oryza sativa Indica Group]
BGIOSGA005809	747	279	1964	151	47	119	6.96407	4.55654e-07	up	hypothetical protein OsI_08532 [Oryza sativa Indica Group]
BGIOSGA014886	639	426	648	1402	725	1203	0.394155	4.56727e-07	down	hypothetical protein OsJ_15179 [Oryza sativa Japonica Group]
BGIOSGA014638	822	789	1009	382	261	259	2.19357	4.59382e-07	up	hypothetical protein OsI_16807 [Oryza sativa Indica Group]
BGIOSGA004396	62	41	66	10	4	3	7.51669	4.6246e-07	up	hypothetical protein OsI_03628 [Oryza sativa Indica Group]
BGIOSGA022084	96	70	103	18	10	23	4.03364	4.63941e-07	up	hypothetical protein OsI_21334 [Oryza sativa Indica Group]
BGIOSGA009038	128	99	180	34	31	32	3.13594	4.64874e-07	up	PREDICTED: NEP1-interacting protein-like 2 isoform X2 [Oryza sativa Japonica Group]
BGIOSGA014663	444	568	585	152	159	223	2.2737	4.66387e-07	up	PREDICTED: L-type lectin-domain containing receptor kinase IV.1 [Oryza sativa Japonica Group]
BGIOSGA009234	257	254	246	372	377	525	0.454434	4.69572e-07	down	PREDICTED: uncharacterized protein LOC4331057 [Oryza sativa Japonica Group]
BGIOSGA037524	46	46	75	8	7	6	5.93849	4.70983e-07	up	hypothetical protein OsI_38606 [Oryza sativa Indica Group]
BGIOSGA023509	21	27	30	0	0	0	106.617	4.72336e-07	up	unknown protein [Oryza sativa Japonica Group]
BGIOSGA017161	0	0	0	20	15	15	0.00837251	4.72835e-07	down	hypothetical protein OsI_17472 [Oryza sativa Indica Group]
BGIOSGA019646	774	1483	1588	2123	2823	4610	0.304645	4.80921e-07	down	PREDICTED: probable WRKY transcription factor 26 isoform X3 [Oryza sativa Japonica Group]
BGIOSGA008523	2841	2039	2066	739	766	699	2.39411	4.8621e-07	up	PREDICTED: probable serine/threonine-protein kinase DDB_G0276461 [Oryza sativa Japonica Group]
BGIOSGA019325	40	74	173	4	7	13	8.77729	4.87307e-07	up	hypothetical protein OsI_18787 [Oryza sativa Indica Group]
BGIOSGA026504	221	137	151	359	419	332	0.346245	4.89492e-07	down	hypothetical protein OsI_30234 [Oryza sativa Indica Group]
BGIOSGA002461	200	318	441	67	25	86	4.13284	4.90393e-07	up	PREDICTED: metal tolerance protein 7 isoform X1 [Oryza sativa Japonica Group]
BGIOSGA015612	49	53	47	99	92	137	0.348132	4.90395e-07	down	PREDICTED: probable NAD(P)H-dependent oxidoreductase 1 [Oryza sativa Japonica Group]
BGIOSGA009462	1111	2019	2025	604	338	490	2.74579	4.9312e-07	up	hypothetical protein OsJ_13328 [Oryza sativa Japonica Group]
BGIOSGA029689	241	586	667	24	34	119	6.49636	5.00424e-07	up	RecName: Full=Protein TIFY 10c
BGIOSGA036857	159	115	185	17	23	47	4.0123	5.04314e-07	up	hypothetical protein OsI_37170 [Oryza sativa Indica Group]
BGIOSGA002351	127	117	219	40	9	21	5.02235	5.06214e-07	up	hypothetical protein OsI_00492 [Oryza sativa Indica Group]
BGIOSGA002558	806	779	471	1948	1655	1285	0.322994	5.10952e-07	down	hypothetical protein OsI_00042 [Oryza sativa Indica Group]
BGIOSGA026538	85	57	142	18	11	16	4.71016	5.14988e-07	up	PREDICTED: RHOMBOID-like protein 2 [Oryza sativa Japonica Group]
BGIOSGA005796	6081	4240	5255	8374	7260	8454	0.492074	5.20586e-07	down	hypothetical protein OsI_08564 [Oryza sativa Indica Group]
BGIOSGA017149	517	396	1058	185	120	147	3.22499	5.31453e-07	up	hypothetical protein OsI_17456 [Oryza sativa Indica Group]
BGIOSGA002381	16	26	42	0	0	0	112.829	5.375e-07	up	RecName: Full=Histone H2B.10
BGIOSGA028335	58	95	151	196	251	291	0.304927	5.40373e-07	down	hypothetical protein OsI_28521 [Oryza sativa Indica Group]
BGIOSGA003415	76	74	210	11	12	23	5.77578	5.45516e-07	up	hypothetical protein OsI_01712 [Oryza sativa Indica Group]
BGIOSGA022187	867	671	465	1692	1453	1350	0.343135	5.45588e-07	down	hypothetical protein OsI_21390 [Oryza sativa Indica Group]
BGIOSGA036833	834	740	1256	1410	1298	1914	0.460604	5.49279e-07	down	PREDICTED: probable trans-2-enoyl-CoA reductase, mitochondrial [Oryza sativa Japonica Group]
BGIOSGA001493	184	119	454	43	25	47	4.85973	5.50344e-07	up	hypothetical protein OsI_02280 [Oryza sativa Indica Group]
BGIOSGA029566	51	7	55	0	0	0	151.524	5.60847e-07	up	hypothetical protein OsI_31804 [Oryza sativa Indica Group]
BGIOSGA016795	339	443	472	134	144	144	2.2373	5.64103e-07	up	PREDICTED: uncharacterized protein LOC4336460 [Oryza sativa Japonica Group]
BGIOSGA029543	11	44	39	0	0	0	128.056	5.67974e-07	up	hypothetical protein OsI_31852 [Oryza sativa Indica Group]
BGIOSGA006161	792	779	916	1197	1415	2693	0.359197	5.68893e-07	down	hypothetical protein OsI_07836 [Oryza sativa Indica Group]
BGIOSGA036818	221	160	147	378	323	337	0.389446	5.73173e-07	down	PREDICTED: probable LRR receptor-like serine/threonine-protein kinase At1g67720 [Oryza sativa Japonica Group]
BGIOSGA027661	0	0	0	14	15	20	0.00856584	5.74954e-07	down	hypothetical protein OsI_27798 [Oryza sativa Indica Group]
BGIOSGA012274	356	232	326	501	637	568	0.401596	5.78064e-07	down	hypothetical protein OsI_10847 [Oryza sativa Indica Group]
BGIOSGA025905	184	118	215	38	45	43	3.0644	5.81272e-07	up	hypothetical protein OsI_26389 [Oryza sativa Indica Group]
BGIOSGA009121	1024	1272	4132	347	314	420	4.31207	5.92449e-07	up	hypothetical protein OsI_09105 [Oryza sativa Indica Group]
BGIOSGA032304	88	76	191	15	10	27	5.11653	6.01855e-07	up	hypothetical protein OsI_32704 [Oryza sativa Indica Group]
BGIOSGA037237	368	455	680	122	112	193	2.65484	6.03451e-07	up	hypothetical protein OsI_37991 [Oryza sativa Indica Group]
EPlOING00000041397	29	28	20	0	0	0	107.174	6.07161e-07	up	.
BGIOSGA005991	171	250	420	25	66	33	4.86539	6.07776e-07	up	hypothetical protein OsI_08165 [Oryza sativa Indica Group]
BGIOSGA030546	10	4	3	46	36	29	0.117111	6.14198e-07	down	hypothetical protein OsI_30953 [Oryza sativa Indica Group]
BGIOSGA009090	100	26	62	5	5	3	10.9111	6.23661e-07	up	hypothetical protein OsI_09018 [Oryza sativa Indica Group]
BGIOSGA025094	607	508	497	842	886	902	0.465941	6.33749e-07	down	hypothetical protein OsI_24778 [Oryza sativa Indica Group]
BGIOSGA035983	44	21	19	0	0	0	117.406	6.34754e-07	up	hypothetical protein OsI_38773 [Oryza sativa Indica Group]
BGIOSGA021800	343	389	803	137	110	142	2.92377	6.34954e-07	up	hypothetical protein OsI_21894 [Oryza sativa Indica Group]
BGIOSGA023515	458	378	599	722	607	879	0.491227	6.39347e-07	down	hypothetical protein OsI_24279 [Oryza sativa Indica Group]
BGIOSGA018604	39	63	54	5	1	8	8.64387	6.42434e-07	up	hypothetical protein OsI_18860 [Oryza sativa Indica Group]
BGIOSGA013617	270	360	377	473	821	827	0.355228	6.42649e-07	down	PREDICTED: probable N-acetyltransferase HLS1 [Oryza sativa Japonica Group]
BGIOSGA002522	551	902	294	138	74	69	4.88212	6.45072e-07	up	hypothetical protein OsI_00126 [Oryza sativa Indica Group]
BGIOSGA001599	160	100	6	1	0	1	107.973	6.45272e-07	up	PREDICTED: pathogenesis-related protein PRB1-2 [Oryza sativa Japonica Group]
BGIOSGA023672	0	5	7	64	28	27	0.0754276	6.47668e-07	down	hypothetical protein OsI_27426 [Oryza sativa Indica Group]
BGIOSGA002956	76	83	111	142	174	268	0.349629	6.48273e-07	down	hypothetical protein OsI_00792 [Oryza sativa Indica Group]
BGIOSGA007547	6	4	1	30	37	26	0.0899926	6.48299e-07	down	hypothetical protein OsI_05862 [Oryza sativa Indica Group]
BGIOSGA036112	0	0	0	18	16	14	0.00868039	6.53049e-07	down	hypothetical protein OsI_38491 [Oryza sativa Indica Group]
BGIOSGA026095	291	241	344	102	83	116	2.20538	6.55706e-07	up	hypothetical protein OsI_26792 [Oryza sativa Indica Group]
BGIOSGA016718	2679	2785	1716	5400	5345	4490	0.361166	6.59206e-07	down	hypothetical protein OsI_16534 [Oryza sativa Indica Group]
BGIOSGA016678	165	144	270	52	38	60	2.90033	6.60003e-07	up	hypothetical protein OsI_16454 [Oryza sativa Indica Group]
BGIOSGA016831	557	908	778	238	195	132	2.98942	6.65395e-07	up	hypothetical protein OsI_16783 [Oryza sativa Indica Group]
BGIOSGA014331	286	275	321	508	481	1233	0.307314	6.6804e-07	down	hypothetical protein OsI_17443 [Oryza sativa Indica Group]
BGIOSGA000371	2132	1733	2010	2922	3404	3004	0.473639	6.83377e-07	down	hypothetical protein OsI_04696 [Oryza sativa Indica Group]
BGIOSGA029464	3211	2487	2581	4757	4366	4229	0.471409	7.0412e-07	down	PREDICTED: peroxisomal nicotinamide adenine dinucleotide carrier [Oryza sativa Japonica Group]
BGIOSGA037263	2153	1494	1799	3206	3310	2827	0.439581	7.13028e-07	down	hypothetical protein OsI_38049 [Oryza sativa Indica Group]
BGIOSGA012748	60	75	155	15	14	16	4.75648	7.20837e-07	up	hypothetical protein OsI_11803 [Oryza sativa Indica Group]
BGIOSGA004048	83	39	81	5	7	12	6.3986	7.23118e-07	up	PREDICTED: probable receptor-like protein kinase At2g42960 [Oryza sativa Japonica Group]
BGIOSGA018687	12	32	43	0	0	0	116.994	7.26155e-07	up	hypothetical protein OsI_18703 [Oryza sativa Indica Group]
BGIOSGA016945	64	101	163	21	14	22	4.30519	7.35589e-07	up	hypothetical protein OsI_17037 [Oryza sativa Indica Group]
BGIOSGA020514	4922	5260	4712	7052	7694	7905	0.499432	7.43448e-07	down	hypothetical protein OsI_24501 [Oryza sativa Indica Group]
BGIOSGA012541	1159	1335	2210	372	315	622	2.71465	7.45351e-07	up	hypothetical protein OsI_11384 [Oryza sativa Indica Group]
BGIOSGA002775	23	18	29	66	80	56	0.257176	7.46321e-07	down	hypothetical protein OsI_00380 [Oryza sativa Indica Group]
EPlOING00000028661	13	44	9	105	105	134	0.150431	7.48746e-07	down	.
BGIOSGA028458	84	75	194	21	19	16	4.61446	7.55484e-07	up	hypothetical protein OsI_28799 [Oryza sativa Indica Group]
BGIOSGA035671	113	108	89	225	207	183	0.383577	7.6042e-07	down	hypothetical protein OsI_36944 [Oryza sativa Indica Group]
BGIOSGA036360	440	325	417	147	106	152	2.22883	7.66449e-07	up	hypothetical protein OsI_38013 [Oryza sativa Indica Group]
BGIOSGA037072	39	37	43	82	88	88	0.347796	7.67376e-07	down	hypothetical protein OsI_37633 [Oryza sativa Indica Group]
BGIOSGA027752	1022	851	885	2050	1468	1345	0.43164	7.70452e-07	down	hypothetical protein OsI_27603 [Oryza sativa Indica Group]
BGIOSGA028301	271	302	294	58	86	101	2.68229	7.70637e-07	up	CONSTANS-like protein [Oryza sativa Japonica Group]
BGIOSGA013882	56	49	121	13	2	7	7.7174	7.71103e-07	up	expressed protein [Oryza sativa Japonica Group]
BGIOSGA035891	1047	1232	877	320	338	261	2.60925	7.71265e-07	up	hypothetical protein OsI_38998 [Oryza sativa Indica Group]
EPlOING00000043716	0	0	0	18	13	16	0.00894632	7.83038e-07	down	.
BGIOSGA000837	68	58	34	7	2	5	8.9666	7.84462e-07	up	hypothetical protein OsI_03716 [Oryza sativa Indica Group]
BGIOSGA018073	4003	4448	8887	1521	1323	2034	2.6471	7.88059e-07	up	hypothetical protein OsI_19926 [Oryza sativa Indica Group]
BGIOSGA016010	709	635	629	945	1081	1105	0.477865	7.93044e-07	down	hypothetical protein OsI_15093 [Oryza sativa Indica Group]
BGIOSGA012862	528	464	378	944	935	754	0.395701	8.00159e-07	down	hypothetical protein OsI_12028 [Oryza sativa Indica Group]
BGIOSGA018063	3340	3863	8208	1593	1065	1378	2.82952	8.06937e-07	up	hypothetical protein OsI_19945 [Oryza sativa Indica Group]
BGIOSGA014982	87	71	172	17	16	4	6.46072	8.13658e-07	up	hypothetical protein OsI_16126 [Oryza sativa Indica Group]
BGIOSGA010271	63	139	160	20	18	25	4.32172	8.15302e-07	up	PREDICTED: uncharacterized protein LOC4333415 [Oryza sativa Japonica Group]
BGIOSGA019810	44	64	111	11	10	8	5.57666	8.18761e-07	up	hypothetical protein OsI_19844 [Oryza sativa Indica Group]
BGIOSGA024581	31	8	68	0	0	0	140.158	8.3286e-07	up	hypothetical protein OsI_25422 [Oryza sativa Indica Group]
BGIOSGA023802	40	66	25	1	0	0	94.7691	8.34311e-07	up	hypothetical protein OsI_27128 [Oryza sativa Indica Group]
BGIOSGA014774	33	25	18	0	0	0	106.108	8.37292e-07	up	hypothetical protein OsI_16536 [Oryza sativa Indica Group]
BGIOSGA032851	325	239	315	502	465	446	0.469224	8.42349e-07	down	hypothetical protein OsI_33432 [Oryza sativa Indica Group]
BGIOSGA030737	57	47	135	5	3	14	8.15091	8.46072e-07	up	hypothetical protein OsI_31324 [Oryza sativa Indica Group]
BGIOSGA011306	146	86	117	236	223	225	0.386375	8.4804e-07	down	hypothetical protein OsI_10327 [Oryza sativa Indica Group]
BGIOSGA023169	1	0	0	14	42	26	0.00965453	8.51201e-07	down	hypothetical protein OsI_23529 [Oryza sativa Indica Group]
BGIOSGA036389	1018	964	696	2120	1578	1546	0.39297	8.518e-07	down	hypothetical protein OsI_37959 [Oryza sativa Indica Group]
BGIOSGA032011	375	355	802	48	43	151	4.80487	8.53658e-07	up	Putative red chlorophyll catabolite reductase [Oryza sativa Japonica Group]
BGIOSGA030415	60	66	91	17	9	13	4.20881	8.56771e-07	up	hypothetical protein OsI_30663 [Oryza sativa Indica Group]
BGIOSGA001492	59	67	123	6	16	6	6.42642	8.58065e-07	up	hypothetical protein OsI_02281 [Oryza sativa Indica Group]
BGIOSGA016816	1674	1380	1711	2485	2568	2209	0.492751	8.58589e-07	down	hypothetical protein OsI_16756 [Oryza sativa Indica Group]
BGIOSGA016840	44	49	58	108	93	99	0.379994	8.65998e-07	down	Os04g0538000, partial [Oryza sativa Japonica Group]
BGIOSGA000585	27	35	16	0	0	0	109.552	8.72738e-07	up	hypothetical protein OsI_04234 [Oryza sativa Indica Group]
BGIOSGA037817	197	121	284	34	41	56	3.42558	8.75091e-07	up	PREDICTED: protein YABBY 6 [Oryza sativa Japonica Group]
BGIOSGA034818	2169	1913	1446	3975	3719	3098	0.391226	8.81184e-07	down	hypothetical protein OsI_35151 [Oryza sativa Indica Group]
BGIOSGA012871	62	64	147	6	16	5	7.22068	8.87612e-07	up	PREDICTED: COBRA-like protein 5 [Oryza sativa Japonica Group]
BGIOSGA018449	54	58	70	12	1	5	7.78147	8.90233e-07	up	hypothetical protein OsI_19139 [Oryza sativa Indica Group]
BGIOSGA030020	178	190	240	73	59	65	2.32904	8.90261e-07	up	hypothetical protein OsI_30820 [Oryza sativa Indica Group]
EPlOING00000021791	42	28	44	0	2	3	17.2111	8.9171e-07	up	.
BGIOSGA031235	9248	7176	4827	17247	17595	13819	0.334436	8.92336e-07	down	hypothetical protein OsI_32329 [Oryza sativa Indica Group]
BGIOSGA027913	8889	10202	21076	3559	3064	4442	2.69396	8.92546e-07	up	PREDICTED: glyceraldehyde-3-phosphate dehydrogenase 1, cytosolic [Oryza sativa Japonica Group]
BGIOSGA015387	74	97	137	7	20	20	4.85682	8.92783e-07	up	hypothetical protein OsI_15291 [Oryza sativa Indica Group]
BGIOSGA020495	396	337	715	839	774	1059	0.403536	8.93896e-07	down	hypothetical protein OsI_24554 [Oryza sativa Indica Group]
BGIOSGA014508	103	85	108	21	20	29	3.21448	8.93941e-07	up	hypothetical protein OsI_17086 [Oryza sativa Indica Group]
BGIOSGA014387	992	1877	3006	419	389	571	3.1699	9.16059e-07	up	hypothetical protein OsI_17311 [Oryza sativa Indica Group]
BGIOSGA019165	275	195	317	82	69	95	2.41861	9.20543e-07	up	hypothetical protein OsI_18420 [Oryza sativa Indica Group]
BGIOSGA012858	73	44	31	5	2	0	16.3393	9.21192e-07	up	hypothetical protein OsI_12023 [Oryza sativa Indica Group]
BGIOSGA028524	1	2	0	24	20	26	0.0329214	9.36889e-07	down	hypothetical protein OsI_28947 [Oryza sativa Indica Group]
BGIOSGA003410	324	195	289	85	72	68	2.71291	9.37343e-07	up	hypothetical protein OsI_01703 [Oryza sativa Indica Group]
BGIOSGA017137	604	617	1224	245	210	264	2.52536	9.43568e-07	up	hypothetical protein OsI_17430 [Oryza sativa Indica Group]
BGIOSGA013115	462	537	941	177	155	234	2.56357	9.48659e-07	up	hypothetical protein OsI_12594 [Oryza sativa Indica Group]
BGIOSGA034683	0	0	0	19	9	21	0.00871703	9.50186e-07	down	hypothetical protein OsI_34864 [Oryza sativa Indica Group]
BGIOSGA017874	91	116	372	24	13	34	6.01808	9.53818e-07	up	PREDICTED: alanine--glyoxylate aminotransferase 2 homolog 2, mitochondrial [Oryza sativa Japonica Group]
BGIOSGA013672	1678	1739	1594	3168	2038	2665	0.489415	9.55425e-07	down	hypothetical protein OsI_13762 [Oryza sativa Indica Group]
BGIOSGA001963	13	16	79	0	0	0	139.393	9.55799e-07	up	PREDICTED: flowering-promoting factor 1-like protein 1 [Oryza sativa Japonica Group]
BGIOSGA020661	239	374	614	94	83	122	3.06023	9.58486e-07	up	hypothetical protein OsI_24207 [Oryza sativa Indica Group]
BGIOSGA030756	295	253	523	82	48	119	3.25687	9.58689e-07	up	hypothetical protein OsI_31366 [Oryza sativa Indica Group]
BGIOSGA012582	6736	4170	4534	9326	11184	9721	0.386718	9.70822e-07	down	hypothetical protein OsI_11472 [Oryza sativa Indica Group]
BGIOSGA016511	0	1	0	16	22	38	0.0108142	9.7571e-07	down	hypothetical protein OsI_16102 [Oryza sativa Indica Group]
BGIOSGA015875	276	165	556	61	59	74	3.77335	9.84338e-07	up	hypothetical protein OsI_14800 [Oryza sativa Indica Group]
BGIOSGA016844	3505	2351	1763	5095	6047	6122	0.339093	9.94218e-07	down	PREDICTED: NAD(P)H-quinone oxidoreductase subunit M, chloroplastic [Oryza sativa Japonica Group]
BGIOSGA005448	1494	1239	1118	2065	2230	2224	0.450054	1.00465e-06	down	hypothetical protein OsI_09264 [Oryza sativa Indica Group]
BGIOSGA030142	175	179	231	64	44	74	2.4459	1.00574e-06	up	hypothetical protein OsI_30578 [Oryza sativa Indica Group]
BGIOSGA012158	31	20	22	61	60	80	0.277538	1.01981e-06	down	hypothetical protein OsI_10594 [Oryza sativa Indica Group]
BGIOSGA026377	89	12	69	2	0	1	43.1222	1.03293e-06	up	PREDICTED: phylloplanin [Oryza sativa Japonica Group]
BGIOSGA017996	33	59	135	6	2	10	9.42116	1.03877e-06	up	hypothetical protein OsI_20070 [Oryza sativa Indica Group]
BGIOSGA017534	1579	1517	1017	3492	2896	2333	0.361567	1.04552e-06	down	hypothetical protein OsI_21053 [Oryza sativa Indica Group]
BGIOSGA013890	468	477	800	175	162	230	2.30719	1.04798e-06	up	PREDICTED: ferredoxin-3, chloroplastic [Oryza sativa Japonica Group]
BGIOSGA006696	184	169	163	316	258	277	0.462247	1.0586e-06	down	hypothetical protein OsI_06744 [Oryza sativa Indica Group]
BGIOSGA024312	648	850	1038	356	229	270	2.24147	1.05998e-06	up	hypothetical protein OsI_25989 [Oryza sativa Indica Group]
BGIOSGA034632	23	14	43	0	0	0	106.687	1.06411e-06	up	hypothetical protein OsI_34836 [Oryza sativa Indica Group]
BGIOSGA003085	78	73	178	14	6	24	5.63877	1.06917e-06	up	PREDICTED: pectinesterase [Oryza sativa Japonica Group]
BGIOSGA009456	2115	1103	1067	3560	3678	3007	0.319115	1.08057e-06	down	putative ribosomal S1 protein (with alternative splicing) [Oryza sativa Japonica Group]
BGIOSGA007498	68	68	138	16	15	18	4.15132	1.08586e-06	up	hypothetical protein OsI_05789 [Oryza sativa Indica Group]
BGIOSGA003052	98	62	61	164	169	162	0.340081	1.08608e-06	down	hypothetical protein OsI_00987 [Oryza sativa Indica Group]
BGIOSGA004740	300	294	304	107	97	121	2.10512	1.09011e-06	up	hypothetical protein OsI_04311 [Oryza sativa Indica Group]
BGIOSGA014941	807	735	1474	258	142	354	3.03433	1.09154e-06	up	hypothetical protein OsI_16212 [Oryza sativa Indica Group]
BGIOSGA026202	28	15	31	0	0	0	100.497	1.09951e-06	up	hypothetical protein OsI_26990 [Oryza sativa Indica Group]
BGIOSGA011172	524	492	994	1267	960	1883	0.36819	1.10195e-06	down	hypothetical protein OsI_10634 [Oryza sativa Indica Group]
BGIOSGA010097	231	207	223	84	55	54	2.60687	1.10866e-06	up	hypothetical protein OsI_12914 [Oryza sativa Indica Group]
EPlOING00000003199	30	15	29	0	0	0	100.894	1.11e-06	up	.
BGIOSGA014876	25	24	21	0	0	0	96.8415	1.11229e-06	up	hypothetical protein OsI_16322 [Oryza sativa Indica Group]
BGIOSGA000081	0	0	0	7	13	41	0.00703991	1.11501e-06	down	hypothetical protein OsI_05258 [Oryza sativa Indica Group]
BGIOSGA033236	252	148	211	53	41	20	4.02109	1.11826e-06	up	hypothetical protein OsI_34236 [Oryza sativa Indica Group]
BGIOSGA001658	2622	2279	1491	5356	4377	3966	0.359493	1.14052e-06	down	hypothetical protein OsI_01905 [Oryza sativa Indica Group]
BGIOSGA008887	206	167	193	66	52	55	2.48654	1.14149e-06	up	hypothetical protein OsI_08620 [Oryza sativa Indica Group]
BGIOSGA032583	152	150	184	53	41	58	2.42905	1.1426e-06	up	hypothetical protein OsI_32839 [Oryza sativa Indica Group]
BGIOSGA005246	1907	1504	1487	2693	2390	2624	0.485527	1.14893e-06	down	hypothetical protein OsI_05346 [Oryza sativa Indica Group]
BGIOSGA008467	1035	813	448	2049	1834	1827	0.311859	1.17452e-06	down	RecName: Full=Ent-cassa-12,15-diene synthase; AltName: Full=Diterpene cyclase 1; Short=OsDTC1; AltName: Full=Ent-kaurene synthase-like 7; Short=OsKSL7
BGIOSGA011183	194	190	208	69	62	59	2.358	1.17954e-06	up	hypothetical protein OsI_10613 [Oryza sativa Indica Group]
BGIOSGA018639	26	30	65	3	1	1	17.9266	1.18011e-06	up	hypothetical protein OsI_18800 [Oryza sativa Indica Group]
BGIOSGA026447	1120	937	774	2081	1555	1578	0.417086	1.18219e-06	down	hypothetical protein OsI_27444 [Oryza sativa Indica Group]
BGIOSGA000783	1799	2219	3126	948	492	813	2.40737	1.18938e-06	up	PREDICTED: aspartate aminotransferase, cytoplasmic [Oryza sativa Japonica Group]
BGIOSGA005788	1212	1191	925	1739	1986	2097	0.436881	1.1968e-06	down	PREDICTED: ubiquinol oxidase 2, mitochondrial [Oryza sativa Japonica Group]
BGIOSGA009154	1116	1033	873	1583	1629	1728	0.467292	1.20948e-06	down	hypothetical protein OsI_09186 [Oryza sativa Indica Group]
EPlOING00000030143	56	40	36	106	87	115	0.329491	1.21483e-06	down	.
BGIOSGA011688	2554	1436	1545	3478	3759	4000	0.376353	1.23435e-06	down	hypothetical protein OsI_09685 [Oryza sativa Indica Group]
BGIOSGA011764	102	43	31	6	0	1	19.949	1.24004e-06	up	hypothetical protein OsI_09823 [Oryza sativa Indica Group]
BGIOSGA005364	12028	11282	7588	26011	21760	17372	0.363639	1.24063e-06	down	PREDICTED: uncharacterized protein sll0005 [Oryza sativa Japonica Group]
BGIOSGA007969	3971	3071	2465	7194	6363	5374	0.384091	1.24074e-06	down	PREDICTED: protein phosphatase 2C and cyclic nucleotide-binding/kinase domain-containing protein isoform X2 [Oryza sativa Japonica Group]
EPlOING00000029947	0	0	0	20	25	7	0.00780519	1.24284e-06	down	.
BGIOSGA029383	763	1027	572	1625	1317	2295	0.352964	1.26358e-06	down	RecName: Full=Protein STAY-GREEN, chloroplastic; AltName: Full=Protein STAYGREEN; Flags: Precursor
BGIOSGA025365	4082	3466	3056	7292	6908	5310	0.412452	1.26416e-06	down	PREDICTED: zeta-carotene desaturase, chloroplastic/chromoplastic [Oryza sativa Japonica Group]
BGIOSGA034484	51	48	22	0	1	0	87.5373	1.26967e-06	up	hypothetical_protein [Oryza glaberrima]
BGIOSGA009136	1811	1338	1602	2904	2049	2435	0.490893	1.26984e-06	down	hypothetical protein OsI_09152 [Oryza sativa Indica Group]
EPlOING00000029892	28	26	79	2	1	0	32.3093	1.27499e-06	up	.
BGIOSGA009475	306	192	318	658	516	418	0.384122	1.28009e-06	down	hypothetical protein OsI_14258 [Oryza sativa Indica Group]
BGIOSGA004617	52	16	110	4	2	2	16.2057	1.281e-06	up	hypothetical protein OsI_04083 [Oryza sativa Indica Group]
BGIOSGA016562	22	33	38	91	56	86	0.303738	1.29501e-06	down	B1358B12.18 [Oryza sativa Japonica Group]
BGIOSGA036706	477	643	503	196	157	132	2.54611	1.30959e-06	up	hypothetical protein OsI_37326 [Oryza sativa Indica Group]
BGIOSGA006632	71	23	55	5	1	0	18.8373	1.32779e-06	up	PREDICTED: glycine-rich cell wall structural protein 1 [Oryza sativa Japonica Group]
BGIOSGA007648	677	804	591	223	89	216	3.0821	1.33363e-06	up	hypothetical protein OsI_06054 [Oryza sativa Indica Group]
BGIOSGA016561	131	91	80	15	20	22	4.05948	1.3567e-06	up	PREDICTED: uncharacterized protein LOC4336073 [Oryza sativa Japonica Group]
BGIOSGA037104	1962	1298	1020	3066	3570	2952	0.340791	1.36736e-06	down	hypothetical protein OsI_37706 [Oryza sativa Indica Group]
BGIOSGA016390	36	6	62	0	0	0	137.045	1.36992e-06	up	.
BGIOSGA007012	111	50	80	16	9	11	5.11435	1.37394e-06	up	hypothetical protein OsI_06115 [Oryza sativa Indica Group]
BGIOSGA027038	1322	1101	756	2369	2419	1968	0.360005	1.37525e-06	down	hypothetical protein OsI_29099 [Oryza sativa Indica Group]
BGIOSGA029427	192	93	154	24	29	38	3.66092	1.3827e-06	up	hypothetical protein OsI_32067 [Oryza sativa Indica Group]
BGIOSGA028193	188	206	105	445	416	354	0.316223	1.38387e-06	down	PREDICTED: DIMBOA UDP-glucosyltransferase BX8 [Oryza sativa Japonica Group]
BGIOSGA002387	1372	1948	1638	680	505	538	2.19495	1.39704e-06	up	PREDICTED: very-long-chain enoyl-CoA reductase [Oryza sativa Japonica Group]
BGIOSGA013767	11668	9727	9240	16198	16859	15960	0.474912	1.39984e-06	down	hypothetical protein OsI_13973 [Oryza sativa Indica Group]
BGIOSGA018651	998	1480	1338	497	327	497	2.21652	1.40342e-06	up	hypothetical protein OsI_18777 [Oryza sativa Indica Group]
BGIOSGA014600	175	158	136	46	38	45	2.78911	1.41771e-06	up	RecName: Full=Homeobox-leucine zipper protein HOX17; AltName: Full=HD-ZIP protein HOX17; AltName: Full=Homeodomain transcription factor HOX17; AltName: Full=OsHox17
BGIOSGA004633	830	1159	2322	341	233	446	3.15791	1.43515e-06	up	PREDICTED: cysteine proteinase inhibitor 1 [Oryza sativa Japonica Group]
BGIOSGA022432	198	208	129	367	309	430	0.375451	1.45516e-06	down	hypothetical protein OsI_21935 [Oryza sativa Indica Group]
BGIOSGA037506	197	149	212	265	322	370	0.439033	1.45822e-06	down	hypothetical protein OsI_38569 [Oryza sativa Indica Group]
BGIOSGA016570	310	115	374	46	30	66	4.25555	1.46778e-06	up	hypothetical protein OsI_16217 [Oryza sativa Indica Group]
BGIOSGA006275	416	449	393	840	686	606	0.448564	1.47064e-06	down	hypothetical protein OsI_07617 [Oryza sativa Indica Group]
BGIOSGA033098	150	140	259	39	31	62	3.13579	1.47277e-06	up	hypothetical protein OsI_33958 [Oryza sativa Indica Group]
EPlOING00000024040	52	53	19	1	0	0	90.141	1.47394e-06	up	.
BGIOSGA013642	639	275	328	61	89	101	3.78489	1.4948e-06	up	hypothetical protein OsI_13698 [Oryza sativa Indica Group]
BGIOSGA033266	417	346	366	620	613	562	0.476073	1.49692e-06	down	hypothetical protein OsI_34292 [Oryza sativa Indica Group]
BGIOSGA008451	182	147	202	263	259	296	0.489919	1.50675e-06	down	hypothetical protein OsI_07707 [Oryza sativa Indica Group]
BGIOSGA005270	62	100	53	198	211	152	0.291654	1.50869e-06	down	hypothetical protein OsI_05401 [Oryza sativa Indica Group]
BGIOSGA006187	186	185	376	67	48	75	2.93736	1.51945e-06	up	hypothetical protein OsI_07789 [Oryza sativa Indica Group]
BGIOSGA018367	1249	1206	769	2521	2165	1940	0.374202	1.52192e-06	down	PREDICTED: uncharacterized protein LOC9270759 isoform X2 [Oryza sativa Japonica Group]
BGIOSGA013841	102	63	117	21	19	16	3.76796	1.52399e-06	up	PREDICTED: ribosomal RNA large subunit methyltransferase E isoform X4 [Oryza sativa Japonica Group]
BGIOSGA022741	208	273	275	89	78	84	2.28131	1.52993e-06	up	hypothetical protein OsI_22633 [Oryza sativa Indica Group]
BGIOSGA008469	1063	370	250	90	70	87	5.35385	1.53503e-06	up	RecName: Full=Ent-copalyl diphosphate synthase 2; Short=Ent-CDP synthase 2; Short=OsCPS2; Short=OsCPS2ent; AltName: Full=Ent-kaurene synthase A; AltName: Full=OsCyc2
BGIOSGA021665	306	256	648	73	83	119	3.25053	1.53895e-06	up	PREDICTED: uncharacterized protein LOC4340492 [Oryza sativa Japonica Group]
BGIOSGA001851	612	892	1380	312	178	308	2.72522	1.54044e-06	up	hypothetical protein OsI_01493 [Oryza sativa Indica Group]
BGIOSGA010770	321	364	1033	109	89	138	3.75304	1.57845e-06	up	PREDICTED: sucrose synthase 4 [Oryza sativa Japonica Group]
BGIOSGA000035	175	100	161	40	33	31	3.16356	1.58446e-06	up	hypothetical protein OsI_05369 [Oryza sativa Indica Group]
BGIOSGA030535	472	593	685	816	1046	1922	0.352595	1.59462e-06	down	TPA_inf: WRKY transcription factor 74 [Oryza sativa (indica cultivar-group)] [Oryza sativa Indica Group]
BGIOSGA030917	198	299	395	87	84	71	2.74011	1.62379e-06	up	hypothetical protein OsI_31665 [Oryza sativa Indica Group]
BGIOSGA005862	93	33	50	167	189	161	0.257764	1.62491e-06	down	unknown protein [Oryza sativa Japonica Group]
BGIOSGA006053	301	458	506	161	94	126	2.52182	1.64604e-06	up	hypothetical protein OsI_08050 [Oryza sativa Indica Group]
BGIOSGA024662	1278	907	798	1641	2320	2189	0.36894	1.65902e-06	down	hypothetical protein OsI_25255 [Oryza sativa Indica Group]
BGIOSGA018227	74	61	119	8	8	22	5.05726	1.66257e-06	up	hypothetical protein OsI_19591 [Oryza sativa Indica Group]
BGIOSGA014643	7769	5317	3865	13336	12791	11409	0.347086	1.66448e-06	down	hypothetical protein OsI_16800 [Oryza sativa Indica Group]
BGIOSGA027148	87	130	163	37	24	24	3.35931	1.66995e-06	up	PREDICTED: protein GrpE isoform X2 [Oryza sativa Japonica Group]
BGIOSGA032443	735	474	522	1178	915	1001	0.428035	1.67061e-06	down	hypothetical protein OsI_32580 [Oryza sativa Indica Group]
BGIOSGA031588	175	191	353	47	54	77	3.0082	1.67884e-06	up	PREDICTED: nucleolar protein 58 isoform X1 [Oryza sativa Japonica Group]
BGIOSGA013101	7849	5498	4776	12327	11827	10726	0.397204	1.68646e-06	down	hypothetical protein OsI_12569 [Oryza sativa Indica Group]
BGIOSGA025221	175	208	306	49	28	81	3.33472	1.68914e-06	up	hypothetical protein OsJ_23253 [Oryza sativa Japonica Group]
BGIOSGA020715	157	269	713	62	28	74	5.15446	1.71903e-06	up	PREDICTED: phosphoglycerate kinase, cytosolic [Oryza sativa Japonica Group]
BGIOSGA020658	42	37	36	1	0	1	44.1818	1.73081e-06	up	hypothetical protein OsI_24212 [Oryza sativa Indica Group]
BGIOSGA030009	18	37	77	1	2	2	19.2868	1.7348e-06	up	hypothetical protein OsI_30842 [Oryza sativa Indica Group]
BGIOSGA005933	1011	626	423	1871	1992	1501	0.294431	1.75368e-06	down	hypothetical protein OsI_08285 [Oryza sativa Indica Group]
BGIOSGA003022	167	331	448	68	65	87	3.21284	1.75505e-06	up	PREDICTED: uncharacterized protein LOC9272458 [Oryza sativa Japonica Group]
BGIOSGA033141	826	697	721	1369	1054	1073	0.489031	1.75701e-06	down	hypothetical protein OsI_34049 [Oryza sativa Indica Group]
BGIOSGA012436	130	413	421	29	59	61	4.80032	1.76389e-06	up	PREDICTED: pathogenesis-related protein 1 [Oryza sativa Japonica Group]
BGIOSGA004784	81	111	339	17	7	33	6.95404	1.78516e-06	up	hypothetical protein OsI_04405 [Oryza sativa Indica Group]
BGIOSGA032809	3445	3211	2622	6083	4991	4736	0.448997	1.78727e-06	down	hypothetical protein OsI_33300 [Oryza sativa Indica Group]
BGIOSGA010611	1410	956	1197	1767	1721	2636	0.445545	1.79815e-06	down	PREDICTED: metacaspase-1 [Oryza sativa Japonica Group]
BGIOSGA010753	691	810	638	1227	1185	1103	0.463178	1.80002e-06	down	PREDICTED: ATP-dependent Clp protease proteolytic subunit-related protein 3, chloroplastic [Oryza sativa Japonica Group]
BGIOSGA029486	135	51	166	10	3	23	7.52082	1.81108e-06	up	hypothetical protein OsI_31939 [Oryza sativa Indica Group]
BGIOSGA023852	480	772	3077	79	14	15	29.184	1.81617e-06	up	hypothetical protein OsI_27001 [Oryza sativa Indica Group]
BGIOSGA033286	241	223	292	98	82	82	2.17511	1.8208e-06	up	PREDICTED: molybdate-anion transporter [Oryza sativa Japonica Group]
EPlOING00000013899	94	44	61	223	139	148	0.298526	1.82481e-06	down	.
BGIOSGA013864	1759	1534	1239	2959	3000	2406	0.412072	1.83649e-06	down	hypothetical protein OsI_14162 [Oryza sativa Indica Group]
BGIOSGA004598	2471	3248	4459	731	790	1425	2.61434	1.85311e-06	up	hypothetical protein OsI_04055 [Oryza sativa Indica Group]
BGIOSGA027127	327	225	336	416	508	685	0.417381	1.86047e-06	down	hypothetical protein OsI_28915 [Oryza sativa Indica Group]
BGIOSGA037175	685	309	634	122	151	118	3.09607	1.87031e-06	up	hypothetical protein OsI_37857 [Oryza sativa Indica Group]
BGIOSGA015178	813	296	650	127	104	168	3.36223	1.90333e-06	up	hypothetical protein OsJ_14636 [Oryza sativa Japonica Group]
BGIOSGA014421	89	115	76	159	216	428	0.271349	1.91116e-06	down	PREDICTED: ubiquinol oxidase 2, mitochondrial [Oryza sativa Japonica Group]
EPlOING00000037551	21	20	24	0	0	0	89.0095	1.92038e-06	up	PREDICTED: uncharacterized protein LOC103634734 [Zea mays]
BGIOSGA016526	9	58	90	0	0	1	106.953	1.92778e-06	up	PREDICTED: uncharacterized protein LOC4336026 [Oryza sativa Japonica Group]
BGIOSGA021054	151	214	263	59	58	68	2.5513	1.93057e-06	up	PREDICTED: heat stress transcription factor C-2b [Oryza sativa Japonica Group]
BGIOSGA006238	1158	865	814	1611	1564	1640	0.450233	1.93815e-06	down	PREDICTED: uncharacterized protein LOC4329695 [Oryza sativa Japonica Group]
BGIOSGA014810	665	688	1424	108	90	308	4.17521	1.9488e-06	up	H0522A01.10 [Oryza sativa Indica Group]
BGIOSGA033384	132	69	117	6	9	27	5.8327	1.94967e-06	up	hypothetical protein OsI_34514 [Oryza sativa Indica Group]
BGIOSGA005228	28	33	162	4	1	6	14.8031	1.95459e-06	up	hypothetical protein OsI_05308 [Oryza sativa Indica Group]
BGIOSGA020465	18	34	25	85	49	90	0.265445	1.95604e-06	down	hypothetical protein OsI_21187 [Oryza sativa Indica Group]
BGIOSGA012071	53	25	98	6	5	4	8.59113	1.97086e-06	up	hypothetical protein OsI_10435 [Oryza sativa Indica Group]
BGIOSGA037675	64	69	138	18	16	11	4.43164	1.97182e-06	up	PREDICTED: probable E3 ubiquitin-protein ligase XERICO [Oryza sativa Japonica Group]
BGIOSGA016330	3136	1838	1428	5240	5384	4602	0.322621	1.97295e-06	down	hypothetical protein OsI_15758 [Oryza sativa Indica Group]
BGIOSGA023107	132	50	427	12	10	29	8.7227	1.98839e-06	up	hypothetical protein OsI_23411 [Oryza sativa Indica Group]
BGIOSGA014529	353	372	342	633	458	543	0.499658	2.01075e-06	down	hypothetical protein OsI_17024 [Oryza sativa Indica Group]
BGIOSGA000102	427	409	414	569	693	697	0.4824	2.04413e-06	down	hypothetical protein OsI_05217 [Oryza sativa Indica Group]
BGIOSGA030782	245	145	278	456	463	366	0.386146	2.04604e-06	down	hypothetical protein OsI_31416 [Oryza sativa Indica Group]
BGIOSGA022163	145	29	113	315	291	380	0.219642	2.0464e-06	down	PREDICTED: uncharacterized protein LOC4337129 [Oryza sativa Japonica Group]
BGIOSGA014589	399	276	143	781	830	695	0.273942	2.04795e-06	down	hypothetical protein OsI_16907 [Oryza sativa Indica Group]
BGIOSGA009238	33	36	36	92	70	72	0.340596	2.04924e-06	down	PREDICTED: proliferating cell nuclear antigen [Oryza sativa Japonica Group]
BGIOSGA019348	18	19	29	0	0	0	89.4538	2.07087e-06	up	hypothetical protein OsI_18841 [Oryza sativa Indica Group]
BGIOSGA020552	34	94	70	0	4	9	11.6692	2.08072e-06	up	hypothetical protein OsI_24425 [Oryza sativa Indica Group]
BGIOSGA033850	195	248	268	430	418	341	0.448204	2.09749e-06	down	hypothetical protein OsI_36402 [Oryza sativa Indica Group]
BGIOSGA021132	15	14	54	0	0	0	108.685	2.10591e-06	up	hypothetical protein OsI_23199 [Oryza sativa Indica Group]
EPlOING00000026993	26	16	24	0	0	0	90.393	2.11132e-06	up	.
BGIOSGA003099	17664	6215	14068	1573	2020	3922	3.8618	2.11842e-06	up	PREDICTED: D-amino-acid transaminase, chloroplastic isoform X1 [Oryza sativa Japonica Group]
BGIOSGA009875	3268	2744	2005	5969	6040	4471	0.370724	2.11858e-06	down	PREDICTED: thioredoxin-like protein AAED1, chloroplastic [Oryza sativa Japonica Group]
BGIOSGA031434	102	72	115	200	222	158	0.370261	2.14311e-06	down	hypothetical protein OsI_34598 [Oryza sativa Indica Group]
BGIOSGA025410	173	337	473	565	730	1469	0.268065	2.14931e-06	down	PREDICTED: NAC domain-containing protein 67 [Oryza sativa Japonica Group]
BGIOSGA014908	622	530	522	820	951	922	0.471113	2.15662e-06	down	hypothetical protein OsI_16266 [Oryza sativa Indica Group]
BGIOSGA010046	280	291	125	616	474	785	0.292782	2.15993e-06	down	hypothetical protein OsI_13040 [Oryza sativa Indica Group]
BGIOSGA028404	0	0	0	11	19	13	0.00955148	2.16271e-06	down	hypothetical protein OsI_28682 [Oryza sativa Indica Group]
BGIOSGA012367	4015	2892	2932	5401	5420	5455	0.460443	2.18136e-06	down	hypothetical protein OsI_11064 [Oryza sativa Indica Group]
BGIOSGA024663	256	197	187	372	383	375	0.431124	2.19365e-06	down	hypothetical protein OsI_25254 [Oryza sativa Indica Group]
BGIOSGA012499	855	686	628	1093	1256	1368	0.445281	2.19499e-06	down	hypothetical protein OsI_11301 [Oryza sativa Indica Group]
BGIOSGA000713	28	24	40	54	107	104	0.257278	2.20014e-06	down	unknown protein [Oryza sativa Japonica Group]
BGIOSGA026440	1034	1397	1267	195	247	499	3.02932	2.20639e-06	up	unknown protein [Oryza sativa Japonica Group]
BGIOSGA002556	36	22	68	0	0	3	31.4636	2.23011e-06	up	hypothetical protein OsI_00045 [Oryza sativa Indica Group]
BGIOSGA035790	457	130	69	7	26	17	10.048	2.25879e-06	up	hypothetical protein OsI_39211 [Oryza sativa Indica Group]
BGIOSGA003040	58	41	96	10	10	5	5.73313	2.26458e-06	up	hypothetical protein OsI_00974 [Oryza sativa Indica Group]
BGIOSGA004756	16	17	37	0	0	0	93.5696	2.2704e-06	up	hypothetical protein OsI_04343 [Oryza sativa Indica Group]
BGIOSGA009245	328	319	373	516	601	492	0.474467	2.29078e-06	down	hypothetical protein OsI_09361 [Oryza sativa Indica Group]
BGIOSGA004006	187	165	467	53	53	63	3.54787	2.29181e-06	up	hypothetical protein OsI_02888 [Oryza sativa Indica Group]
BGIOSGA027488	188	121	167	51	36	31	3.05403	2.30728e-06	up	hypothetical protein OsI_28165 [Oryza sativa Indica Group]
BGIOSGA013792	198	198	306	48	33	89	3.15544	2.33739e-06	up	hypothetical protein OsI_14005 [Oryza sativa Indica Group]
BGIOSGA016745	861	760	636	1722	1356	1131	0.409327	2.33925e-06	down	hypothetical protein OsI_16594 [Oryza sativa Indica Group]
BGIOSGA004752	2383	1401	1895	600	539	753	2.29462	2.34015e-06	up	PREDICTED: putative respiratory burst oxidase homolog protein H [Oryza sativa Japonica Group]
BGIOSGA030078	0	0	0	17	8	19	0.00971082	2.343e-06	down	hypothetical protein OsI_30703 [Oryza sativa Indica Group]
BGIOSGA027495	22	33	35	67	60	92	0.312538	2.35101e-06	down	hypothetical protein OsI_28142 [Oryza sativa Indica Group]
BGIOSGA002298	42	16	16	0	0	0	103.556	2.35601e-06	up	hypothetical protein OsI_00579 [Oryza sativa Indica Group]
BGIOSGA036124	240	279	386	89	54	119	2.63509	2.37964e-06	up	hypothetical protein OsI_38469 [Oryza sativa Indica Group]
BGIOSGA032500	293	206	310	447	366	430	0.492117	2.39186e-06	down	hypothetical protein OsI_32683 [Oryza sativa Indica Group]
BGIOSGA012398	727	672	836	989	991	1621	0.47335	2.41237e-06	down	hypothetical protein OsI_11115 [Oryza sativa Indica Group]
BGIOSGA036179	125	20	17	0	0	1	118.406	2.41241e-06	up	hypothetical protein OsI_38358 [Oryza sativa Indica Group]
BGIOSGA005785	43	28	87	1	6	4	10.3984	2.41289e-06	up	hypothetical protein OsI_08594 [Oryza sativa Indica Group]
BGIOSGA027965	57	41	76	12	5	8	5.25711	2.43529e-06	up	hypothetical protein OsI_27752 [Oryza sativa Indica Group]
BGIOSGA009337	2335	1435	1257	3602	3733	3260	0.362633	2.44889e-06	down	hypothetical protein OsI_09534 [Oryza sativa Indica Group]
BGIOSGA030998	265	310	2164	20	3	29	38.7784	2.45571e-06	up	.
BGIOSGA002244	72	95	156	20	17	29	3.67004	2.46043e-06	up	PREDICTED: type IV inositol polyphosphate 5-phosphatase 3 [Oryza sativa Japonica Group]
BGIOSGA004317	103	159	136	236	355	257	0.350397	2.50856e-06	down	hypothetical protein OsI_03478 [Oryza sativa Indica Group]
BGIOSGA036462	177	128	97	265	330	304	0.341553	2.51275e-06	down	hypothetical protein OsI_37798 [Oryza sativa Indica Group]
BGIOSGA028317	0	1	0	31	15	19	0.0126593	2.53724e-06	down	hypothetical protein OsI_28490 [Oryza sativa Indica Group]
BGIOSGA017714	577	714	1260	281	219	277	2.44434	2.56432e-06	up	hypothetical protein OsI_20656 [Oryza sativa Indica Group]
BGIOSGA026827	828	733	651	1388	1028	1154	0.475458	2.5867e-06	down	hypothetical protein OsI_29561 [Oryza sativa Indica Group]
BGIOSGA028455	137	170	253	299	294	342	0.447605	2.61044e-06	down	hypothetical protein OsI_28793 [Oryza sativa Indica Group]
BGIOSGA014115	3	1	4	23	18	28	0.087704	2.61208e-06	down	hypothetical protein OsI_17878 [Oryza sativa Indica Group]
BGIOSGA006967	8	5	6	21	32	49	0.142039	2.62855e-06	down	hypothetical protein OsI_06203 [Oryza sativa Indica Group]
BGIOSGA016331	110	46	13	2	1	3	22.5773	2.6382e-06	up	hypothetical protein OsI_15762 [Oryza sativa Indica Group]
BGIOSGA026193	102	96	107	159	170	320	0.360806	2.65631e-06	down	PREDICTED: probable calcium-binding protein CML45 [Oryza sativa Japonica Group]
BGIOSGA006257	5664	4014	3482	7295	9691	9001	0.385544	2.67423e-06	down	PREDICTED: uncharacterized protein LOC4329668 [Oryza sativa Japonica Group]
BGIOSGA024062	1290	1138	1071	1722	1586	2629	0.454962	2.67962e-06	down	hypothetical protein OsI_26532 [Oryza sativa Indica Group]
BGIOSGA009089	1545	1253	1336	2017	2963	2381	0.42126	2.68703e-06	down	hypothetical protein OsI_09016 [Oryza sativa Indica Group]
BGIOSGA017541	3627	2990	2517	5256	5213	5077	0.448985	2.70187e-06	down	hypothetical protein OsI_21033 [Oryza sativa Indica Group]
BGIOSGA019305	426	637	894	202	171	237	2.40745	2.71237e-06	up	PREDICTED: uncharacterized protein LOC4338014 [Oryza sativa Japonica Group]
BGIOSGA009509	68	92	246	26	14	18	5.13422	2.72096e-06	up	hypothetical protein OsJ_13230 [Oryza sativa Japonica Group]
BGIOSGA003109	489	629	1129	216	135	257	2.77879	2.73117e-06	up	hypothetical protein OsI_01100 [Oryza sativa Indica Group]
BGIOSGA027737	28	12	28	0	0	0	92.4159	2.73434e-06	up	hypothetical protein OsI_27640 [Oryza sativa Indica Group]
BGIOSGA001334	198	219	403	79	54	90	2.75775	2.81922e-06	up	hypothetical protein OsI_02589 [Oryza sativa Indica Group]
BGIOSGA035794	9232	6449	5202	15623	15533	12126	0.368188	2.82508e-06	down	PREDICTED: phytoene synthase 2, chloroplastic [Oryza sativa Japonica Group]
BGIOSGA002919	43	38	76	7	3	9	6.23287	2.82828e-06	up	hypothetical protein OsI_00699 [Oryza sativa Indica Group]
BGIOSGA037050	0	0	0	25	10	10	0.00937922	2.84247e-06	down	hypothetical protein OsI_30454 [Oryza sativa Indica Group]
BGIOSGA020932	545	466	238	1555	1075	818	0.280723	2.86207e-06	down	hypothetical protein OsI_23601 [Oryza sativa Indica Group]
BGIOSGA005610	180	170	197	71	50	51	2.41196	2.88023e-06	up	hypothetical protein OsI_08963 [Oryza sativa Indica Group]
BGIOSGA005568	150	141	151	38	31	57	2.69179	2.8884e-06	up	hypothetical protein OsI_09036 [Oryza sativa Indica Group]
BGIOSGA017297	149	124	179	34	45	48	2.67188	2.88865e-06	up	OSJNBa0084K01.1 [Oryza sativa Japonica Group]
BGIOSGA021518	618	591	973	152	118	302	2.91218	2.91747e-06	up	PREDICTED: probable peroxygenase 4 [Oryza sativa Japonica Group]
BGIOSGA002400	0	1	0	29	15	19	0.0130515	2.91791e-06	down	hypothetical protein OsI_00386 [Oryza sativa Indica Group]
BGIOSGA015296	13	8	11	59	41	29	0.1871	2.93058e-06	down	hypothetical protein OsI_15455 [Oryza sativa Indica Group]
BGIOSGA009155	4876	5928	4203	11886	7728	8019	0.418192	2.93833e-06	down	hypothetical protein OsI_09187 [Oryza sativa Indica Group]
BGIOSGA016914	805	708	394	2242	1874	1084	0.281071	2.95691e-06	down	hypothetical protein OsI_16969 [Oryza sativa Indica Group]
BGIOSGA008174	14	31	91	0	0	1	91.1291	2.97664e-06	up	PREDICTED: inositol-tetrakisphosphate 1-kinase 4 [Oryza sativa Japonica Group]
BGIOSGA032139	4	8	5	32	21	37	0.145557	2.9775e-06	down	PREDICTED: putative receptor-like protein kinase At4g00960 isoform X1 [Oryza sativa Japonica Group]
BGIOSGA018918	71	24	31	0	3	1	23.7839	2.97862e-06	up	hypothetical protein OsI_18235 [Oryza sativa Indica Group]
BGIOSGA036323	456	455	442	163	143	96	2.53846	2.98233e-06	up	hypothetical protein OsI_38077 [Oryza sativa Indica Group]
BGIOSGA034718	58	58	102	14	13	14	3.96538	2.98375e-06	up	PREDICTED: mini zinc finger protein 1 [Oryza sativa Japonica Group]
BGIOSGA007452	182	181	217	404	228	333	0.459252	2.99289e-06	down	Os08g0367300 [Oryza sativa Japonica Group]
BGIOSGA034703	283	347	244	476	461	613	0.434276	3.02535e-06	down	hypothetical protein OsI_34915 [Oryza sativa Indica Group]
[truncated: 2,990 more rows]
