# Supplementary material for: Integration of Transcriptomic And Proteomic Analyses Reveals Several Levels of Metabolic Regulation In The Excess Starch And Early Senescent Leaf Mutant lses1 In Rice
Source: Research Square preprint supplement (doi:10.21203/rs.3.rs-805903/v1), 2021-09-14
Supplement: Supplementary file 4 [file c5f3f37539505d9b7104d817.xlsx]

## Sheet: proteins
Protein ID	Accession	-10lgP	abundance in WT	abundance in lses1	Fold change	Description
11059	A2YGP6|USP_ORYSI	197.37	1604	642.188	0.4	UDP-sugar pyrophosphorylase OS=Oryza sativa subsp. indica OX=39946 GN=USP PE=3 SV=2
4127	tr|A2YFZ4|A2YFZ4_ORYSI	215.19	458.5	204.245	0.45	Glyceraldehyde-3-phosphate dehydrogenase OS=Oryza sativa subsp. indica OX=39946 GN=OsI_24036 PE=3 SV=1
15808	tr|A2WLD5|A2WLD5_ORYSI	145.78	10290	5475	0.53	Glycosyltransferase OS=Oryza sativa subsp. indica OX=39946 GN=OsI_00644 PE=3 SV=1
29981	tr|A2XG08|A2XG08_ORYSI	38.43	623	337.994	0.54	Hexosyltransferase OS=Oryza sativa subsp. indica OX=39946 GN=OsI_11309 PE=3 SV=1
24506	A2YNH4|6PGL2_ORYSI	85.23	1996	1255	0.63	Probable 6-phosphogluconolactonase 2 OS=Oryza sativa subsp. indica OX=39946 GN=OsI_025867 PE=3 SV=1
26252	tr|B8B9Z2|B8B9Z2_ORYSI	55.21	1106	1696	1.53	Pyrophosphate--fructose 6-phosphate 1-phosphotransferase subunit alpha OS=Oryza sativa subsp. indica OX=39946 GN=PFP-ALPHA PE=3 SV=1
16173	tr|A2YKG1|A2YKG1_ORYSI	140.58	1876	2883	1.54	Glucose-6-phosphate 1-dehydrogenase OS=Oryza sativa subsp. indica OX=39946 GN=OsI_25709 PE=3 SV=1
21292	tr|A2XCC5|A2XCC5_ORYSI	95.39	1602	2526	1.58	Beta-amylase OS=Oryza sativa subsp. indica OX=39946 GN=OsI_09956 PE=3 SV=1
11026	tr|A2YMB7|A2YMB7_ORYSI	200.41	14330	22790	1.59	Beta-amylase OS=Oryza sativa subsp. indica OX=39946 GN=OsI_26372 PE=3 SV=1
10190	tr|A2YVI5|A2YVI5_ORYSI	261.1	6032	9768	1.62	Malate dehydrogenase OS=Oryza sativa subsp. indica OX=39946 GN=OsI_29345 PE=3 SV=1
17728	tr|A2WLL3|A2WLL3_ORYSI	107	1066	1765	1.66	ATP-dependent 6-phosphofructokinase OS=Oryza sativa subsp. indica OX=39946 GN=PFK PE=3 SV=1
25879	tr|A2YMX9|A2YMX9_ORYSI	49.55	1376	2293	1.67	Beta-hexosaminidase OS=Oryza sativa subsp. indica OX=39946 GN=OsI_26587 PE=3 SV=1
8849	tr|D0TZE6|D0TZE6_ORYSI	296	109900	195500	1.78	Starch synthase chloroplastic/amyloplastic OS=Oryza sativa subsp. indica OX=39946 GN=GBSSII PE=3 SV=1
8869	tr|B8B5F4|B8B5F4_ORYSI	296	109900	195500	1.78	Starch synthase chloroplastic/amyloplastic OS=Oryza sativa subsp. indica OX=39946 GN=GBSSII PE=3 SV=1
17090	tr|D0TZM7|D0TZM7_ORYSI	111.06	4516	8080	1.79	Starch synthase chloroplastic/amyloplastic OS=Oryza sativa subsp. indica OX=39946 GN=SSI PE=3 SV=1
17093	tr|D0TZM6|D0TZM6_ORYSI	111.06	4516	8080	1.79	Starch synthase chloroplastic/amyloplastic OS=Oryza sativa subsp. indica OX=39946 GN=SSI PE=3 SV=1
17095	tr|D0TZM8|D0TZM8_ORYSI	111.06	4516	8080	1.79	Starch synthase chloroplastic/amyloplastic OS=Oryza sativa subsp. indica OX=39946 GN=SSI PE=3 SV=1
17097	A2Y9M4|SSY1_ORYSI	111.06	4516	8080	1.79	Soluble starch synthase 1 chloroplastic/amyloplastic OS=Oryza sativa subsp. indica OX=39946 GN=OsI_021017 PE=2 SV=1
11915	tr|A2XWH5|A2XWH5_ORYSI	194.95	9897	17950	1.81	Glycosyltransferase OS=Oryza sativa subsp. indica OX=39946 GN=OsI_17003 PE=3 SV=1
12736	tr|A2Y7W1|A2Y7W1_ORYSI	192.44	9903	18630	1.88	Glucose-1-phosphate adenylyltransferase OS=Oryza sativa subsp. indica OX=39946 GN=AGPlar PE=3 SV=1
18734	tr|B8B024|B8B024_ORYSI	124.47	1886	3581	1.9	ATP-dependent 6-phosphofructokinase OS=Oryza sativa subsp. indica OX=39946 GN=PFK PE=3 SV=1
18103	tr|H6ST15|H6ST15_ORYSI	120.2	1192	2666	2.24	Trehalose-6-phosphate synthase 3 OS=Oryza sativa subsp. indica OX=39946 GN=TPS3 PE=2 SV=1
14652	tr|A6N0K0|A6N0K0_ORYSI	220.86	224.5	648.465	2.89	Glyceraldehyde-3-phosphate dehydrogenase (Fragment) OS=Oryza sativa subsp. indica OX=39946 PE=2 SV=1
21567	tr|B8BMI2|B8BMI2_ORYSI	89.17	249.5	764.349	3.06	Glycosyltransferase OS=Oryza sativa subsp. indica OX=39946 GN=OsI_38729 PE=3 SV=1
9256	B8BM17|KPYC2_ORYSI	268.58	394	1605	4.07	Pyruvate kinase 2 cytosolic OS=Oryza sativa subsp. indica OX=39946 GN=OsI_37456 PE=3 SV=1
9897	tr|D0TZC9|D0TZC9_ORYSI	258.47	1.5	306.609	204.41	Glucose-1-phosphate adenylyltransferase OS=Oryza sativa subsp. indica OX=39946 GN=AGPsma PE=3 SV=1
5533	Q7XTQ5|MEX1_ORYSJ	43.99	142.5	372.276	2.61	Maltose excess protein 1-like chloroplastic OS=Oryza sativa subsp. japonica OX=39947 GN=Os04g0602400 PE=2 SV=2
1643	P31924|SUS1_ORYSJ	186.64	3826	4845	1.27	Sucrose synthase 1 OS=Oryza sativa subsp. japonica OX=39947 GN=SUS1 PE=1 SV=1
543	A2YQL4|SCRK2_ORYSI	291.02	140500	153700	1.1	Fructokinase-2 OS=Oryza sativa subsp. indica OX=39946 GN=FRK2 PE=1 SV=2
471	tr|A0A188I036|A0A188I036_ORYSJ	288.52	7816	10400	1.33	Pyruvate kinase OS=Oryza sativa subsp. japonica OX=39947 PE=2 SV=1
1528	Q2R8Z5|ADH1_ORYSJ	189.75	25740	27640	1.07	Alcohol dehydrogenase 1 OS=Oryza sativa subsp. japonica OX=39947 GN=ADH1 PE=2 SV=2
5870	tr|B8BEN8|B8BEN8_ORYSI	30.64	685.5	487.194	0.71	Beta-amylase OS=Oryza sativa subsp. indica OX=39946 GN=OsI_32458 PE=3 SV=1

## Sheet: genes
Gene	D1(lses1)_count	D2(lses1)_count	D3(lses1)_count	C1(WT)_count	C2(WT)_count	C3(WT)_count	FoldChange	pval	Up/Down	Description	GO:biological_process	GO:cellular_component	GO:molecular_function
BGIOSGA031385	414	229	204	1029	1038	714	0.231779	5.18023e-09	down	PREDICTED: Oryza sativa Japonica Group beta-amylase 3, chloroplastic (LOC4349417), mRNA	GO:0000024|maltose biosynthetic process;GO:0009409|response to cold;GO:0005983|starch catabolic process;	GO:0009570|chloroplast stroma;	GO:0016161|beta-amylase activity;
BGIOSGA012615	845	593	675	1366	1712	1746	0.331581	1.87542e-10	down	PREDICTED: Oryza sativa Japonica Group inactive beta-amylase 9 (LOC4332844), mRNA	GO:0000272|polysaccharide catabolic process;	GO:0005737|cytoplasm;	GO:0016161|beta-amylase activity;
BGIOSGA031131	324	286	195	110	104	95	2.00048	0.00191028	up	PREDICTED: Oryza sativa Japonica Group rhodanese-like domain-containing protein 14, chloroplastic (LOC4347659), mRNA	.	GO:0009507|chloroplast;GO:0009941|chloroplast envelope;GO:0009534|chloroplast thylakoid;GO:0009535|chloroplast thylakoid membrane;	.
BGIOSGA028505	859	988	1655	517	286	515	2.00756	0.000311663	up	PREDICTED: Oryza sativa Japonica Group pyrophosphate--fructose 6-phosphate 1-phosphotransferase subunit alpha (LOC4345338), mRNA	.	GO:0005737|cytoplasm;	GO:0003872|6-phosphofructokinase activity;GO:0005524|ATP binding;GO:0047334|diphosphate-fructose-6-phosphate 1-phosphotransferase activity;GO:0046872|metal ion binding;
BGIOSGA014173	258	255	464	113	85	166	2.0251	0.000805193	up	PREDICTED: Oryza sativa Japonica Group inositol-pentakisphosphate 2-kinase IPK1 (LOC4337286), transcript variant X2, mRNA	GO:0032958|inositol phosphate biosynthetic process;GO:0052746|inositol phosphorylation;	GO:0005634|nucleus;	GO:0005524|ATP binding;GO:0035299|inositol pentakisphosphate 2-kinase activity;GO:0046872|metal ion binding;
BGIOSGA022591	92	63	142	36	34	39	2.02779	0.00517418	up	PREDICTED: Oryza sativa Japonica Group probable fructokinase-6, chloroplastic (LOC4340579), mRNA	GO:0006014|D-ribose metabolic process;GO:0019252|starch biosynthetic process;	GO:0009507|chloroplast;GO:0009570|chloroplast stroma;	GO:0005524|ATP binding;GO:0008865|fructokinase activity;GO:0004747|ribokinase activity;
BGIOSGA014893	516	618	1225	307	202	347	2.06081	0.00083478	up	PREDICTED: Oryza sativa Japonica Group beta-glucosidase 12 (LOC4336145), transcript variant X1, mRNA	GO:0005975|carbohydrate metabolic process;	GO:0005576|extracellular region;	GO:0008422|beta-glucosidase activity;
BGIOSGA026650	345	349	865	168	175	209	2.07137	0.00202218	up	PREDICTED: Oryza sativa Japonica Group isoamylase 1, chloroplastic (LOC4346068), mRNA	GO:0010021|amylopectin biosynthetic process;GO:0019252|starch biosynthetic process;	GO:0009507|chloroplast;GO:0010368|chloroplast isoamylase complex;	GO:0019156|isoamylase activity;
BGIOSGA021542	769	663	1134	373	234	323	2.07979	8.52667e-06	up	PREDICTED: Oryza sativa Japonica Group pyrophosphate--fructose 6-phosphate 1-phosphotransferase subunit beta (LOC4340643), mRNA	GO:0006002|fructose 6-phosphate metabolic process;	GO:0005737|cytoplasm;	GO:0003872|6-phosphofructokinase activity;GO:0005524|ATP binding;GO:0047334|diphosphate-fructose-6-phosphate 1-phosphotransferase activity;GO:0046872|metal ion binding;
BGIOSGA007628	461	435	584	194	164	176	2.08832	7.60522e-08	up	Oryza sativa (indica cultivar-group) cDNA clone:OSIGCRA106A22, full insert sequence	GO:0080144|amino acid homeostasis;GO:0005975|carbohydrate metabolic process;GO:0006006|glucose metabolic process;GO:0006096|glycolytic process;GO:0080022|primary root development;	GO:0009570|chloroplast stroma;GO:0009536|plastid;	GO:0004365|glyceraldehyde-3-phosphate dehydrogenase (NAD+) (phosphorylating) activity;GO:0051287|NAD binding;GO:0050661|NADP binding;
BGIOSGA029619	510	521	724	279	169	184	2.09491	1.9361e-05	up	PREDICTED: Oryza sativa Japonica Group glucose-6-phosphate isomerase 1, chloroplastic (LOC4347311), mRNA	GO:0006094|gluconeogenesis;GO:0006096|glycolytic process;GO:0009911|positive regulation of flower development;GO:0005982|starch metabolic process;	GO:0009507|chloroplast;GO:0009941|chloroplast envelope;GO:0009570|chloroplast stroma;GO:0005829|cytosol;GO:0009536|plastid;	GO:0004347|glucose-6-phosphate isomerase activity;
BGIOSGA033596	83	100	110	47	16	44	2.11578	0.00626089	up	PREDICTED: Oryza sativa Japonica Group probable polygalacturonase (LOC4351055), mRNA	GO:0005975|carbohydrate metabolic process;	GO:0016021|integral component of membrane;	GO:0004650|polygalacturonase activity;
BGIOSGA009065	116	131	170	50	35	61	2.17083	0.000152952	up	PREDICTED: Oryza sativa Japonica Group 2,3-bisphosphoglycerate-dependent phosphoglycerate mutase (LOC4330747), mRNA	GO:0009932|cell tip growth;GO:0046856|phosphatidylinositol dephosphorylation;GO:0010053|root epidermal cell differentiation;GO:0048765|root hair cell differentiation;GO:0048766|root hair initiation;	.	GO:0016787|hydrolase activity;
BGIOSGA013259	106	99	146	49	25	49	2.17364	0.000674218	up	PREDICTED: Oryza sativa Japonica Group type IV inositol polyphosphate 5-phosphatase 7 (LOC4333650), transcript variant X3, mRNA	GO:0046856|phosphatidylinositol dephosphorylation;	.	GO:0016787|hydrolase activity;
BGIOSGA017252	107	62	161	27	26	61	2.18402	0.0115255	up	PREDICTED: Oryza sativa Japonica Group protein IRX15-LIKE (LOC4337222), mRNA	GO:0009834|plant-type secondary cell wall biogenesis;GO:0045492|xylan biosynthetic process;	GO:0005794|Golgi apparatus;GO:0000139|Golgi membrane;GO:0016021|integral component of membrane;	.
BGIOSGA013242	97	55	151	50	30	22	2.19622	0.0130134	up	PREDICTED: Oryza sativa Japonica Group glucan endo-1,3-beta-glucosidase 8 (LOC4333617), mRNA	GO:0005975|carbohydrate metabolic process;GO:0071555|cell wall organization;GO:0006952|defense response;	GO:0031225|anchored component of membrane;GO:0046658|anchored component of plasma membrane;GO:0005618|cell wall;GO:0005576|extracellular region;GO:0005886|plasma membrane;GO:0009506|plasmodesma;	GO:0042973|glucan endo-1,3-beta-D-glucosidase activity;GO:0004553|hydrolase activity, hydrolyzing O-glycosyl compounds;GO:0030247|polysaccharide binding;
BGIOSGA026095	291	241	344	102	83	116	2.20538	6.55706e-07	up	PREDICTED: Oryza sativa Japonica Group UDP-arabinopyranose mutase 3 (LOC4343849), mRNA	GO:0071555|cell wall organization;GO:0030244|cellulose biosynthetic process;GO:0009832|plant-type cell wall biogenesis;GO:0033356|UDP-L-arabinose metabolic process;	GO:0005829|cytosol;GO:0005794|Golgi apparatus;GO:0009506|plasmodesma;	GO:0016866|intramolecular transferase activity;GO:0052691|UDP-arabinopyranose mutase activity;
BGIOSGA006279	445	516	1030	223	209	233	2.20902	0.000117101	up	PREDICTED: Oryza sativa Japonica Group cytosolic invertase 1 (LOC4329626), mRNA	GO:0010311|lateral root formation;GO:0009555|pollen development;GO:0080022|primary root development;GO:0048510|regulation of timing of transition from vegetative to reproductive phase;GO:0005987|sucrose catabolic process;	GO:0005829|cytosol;	GO:0033926|glycopeptide alpha-N-acetylgalactosaminidase activity;GO:0004575|sucrose alpha-glucosidase activity;
BGIOSGA013825	260	204	316	53	90	118	2.24411	0.000467891	up	PREDICTED: Oryza sativa Japonica Group cinnamoyl-CoA reductase 1 (LOC4334578), mRNA	GO:0007623|circadian rhythm;GO:0009809|lignin biosynthetic process;GO:0009409|response to cold;	GO:0005829|cytosol;	GO:0016621|cinnamoyl-CoA reductase activity;GO:0050662|coenzyme binding;
BGIOSGA020219	195	230	408	108	82	82	2.27249	0.000123396	up	PREDICTED: Oryza sativa Japonica Group ATP-dependent 6-phosphofructokinase 6 (LOC4339369), mRNA	GO:0006002|fructose 6-phosphate metabolic process;GO:0006096|glycolytic process;GO:0010053|root epidermal cell differentiation;	GO:0005829|cytosol;	GO:0003872|6-phosphofructokinase activity;GO:0005524|ATP binding;GO:0046872|metal ion binding;
BGIOSGA004691	712	781	835	358	211	208	2.27741	6.49622e-06	up	PREDICTED: Oryza sativa Japonica Group 2,3-bisphosphoglycerate-independent phosphoglycerate mutase (LOC4327493), mRNA	GO:0006007|glucose catabolic process;GO:0006096|glycolytic process;	GO:0005737|cytoplasm;	GO:0030145|manganese ion binding;GO:0004619|phosphoglycerate mutase activity;
BGIOSGA009019	357	342	791	153	117	218	2.27982	0.000410425	up	PREDICTED: Oryza sativa Japonica Group endoglucanase 7 (LOC4330667), mRNA	GO:0071555|cell wall organization;GO:0030245|cellulose catabolic process;	GO:0005576|extracellular region;	GO:0008810|cellulase activity;
BGIOSGA001898	191	238	353	75	71	110	2.29784	3.32486e-05	up	PREDICTED: Oryza sativa Japonica Group pyruvate kinase, cytosolic isozyme (LOC4324263), mRNA	.	GO:0005737|cytoplasm;	GO:0005524|ATP binding;GO:0016301|kinase activity;GO:0000287|magnesium ion binding;GO:0030955|potassium ion binding;GO:0004743|pyruvate kinase activity;
BGIOSGA023598	55	80	75	24	16	28	2.36456	0.00134852	up	PREDICTED: Oryza sativa Japonica Group alpha-amylase isozyme 2A (LOC4342055), mRNA	GO:0005975|carbohydrate metabolic process;	.	GO:0004556|alpha-amylase activity;GO:0005509|calcium ion binding;
BGIOSGA007129	186	151	330	55	56	100	2.36698	0.000404793	up	Oryza sativa Japonica Group DNA, chromosome 2, cultivar: Nipponbare, complete sequence	GO:0071555|cell wall organization;GO:0030245|cellulose catabolic process;	GO:0005576|extracellular region;	GO:0008810|cellulase activity;
BGIOSGA009226	800	586	635	208	171	269	2.40049	3.62266e-07	up	Oryza sativa Indica Group cultivar IR64 heparanase (Hep2) mRNA, complete cds	GO:0030198|extracellular matrix organization;GO:0030200|heparan sulfate proteoglycan catabolic process;	GO:0005576|extracellular region;GO:0005765|lysosomal membrane;GO:0009505|plant-type cell wall;	GO:0004566|beta-glucuronidase activity;GO:0043395|heparan sulfate proteoglycan binding;GO:0030305|heparanase activity;
BGIOSGA010570	56	159	1051	8	13	4	34.1369	1.65298e-05	up	PREDICTED: Oryza sativa Japonica Group sucrose synthase 1 (LOC4333062), transcript variant X2, mRNA	GO:0010037|response to carbon dioxide;GO:0005985|sucrose metabolic process;	.	GO:0016157|sucrose synthase activity;
BGIOSGA017953	160	145	218	52	55	83	2.07829	0.000244924	up	PREDICTED: Oryza sativa Japonica Group uncharacterized LOC4338946 (LOC4338946), transcript variant X2, mRNA	GO:0046777|protein autophosphorylation;GO:0005983|starch catabolic process;GO:0005982|starch metabolic process;	GO:0009507|chloroplast;GO:0009570|chloroplast stroma;GO:0009536|plastid;	GO:0005524|ATP binding;GO:0019200|carbohydrate kinase activity;GO:0046872|metal ion binding;GO:0051752|phosphoglucan, water dikinase activity;GO:2001070|starch binding;
BGIOSGA031063	751	834	1179	282	243	320	2.46242	1.61908e-10	up	PREDICTED: Oryza sativa Japonica Group pyruvate dehydrogenase E1 component subunit beta-2, mitochondrial (LOC4347531), mRNA	GO:0006086|acetyl-CoA biosynthetic process from pyruvate;GO:0006096|glycolytic process;	GO:0005759|mitochondrial matrix;	GO:0004739|pyruvate dehydrogenase (acetyl-transferring) activity;
BGIOSGA034312	673	924	2392	381	323	525	2.3859	0.00131498	up	PREDICTED: Oryza sativa Japonica Group alcohol dehydrogenase 1 (LOC4350053), mRNA	.	GO:0005737|cytoplasm;	GO:0004022|alcohol dehydrogenase (NAD) activity;GO:0008270|zinc ion binding;
BGIOSGA029605	756	580	1273	366	297	287	2.0319	0.000278259	up	PREDICTED: Oryza sativa Japonica Group isoamylase 3, chloroplastic (LOC4347328), mRNA	GO:0005983|starch catabolic process;	GO:0009507|chloroplast;GO:0009569|chloroplast starch grain;GO:0009570|chloroplast stroma;	GO:0019156|isoamylase activity;
BGIOSGA020201	427	513	1072	214	167	237	2.41435	5.9492e-05	up	Oryza sativa Indica Group trehalose-6-phosphate synthase 1 (TPS1) mRNA, complete cds	GO:0051301|cell division;GO:0016311|dephosphorylation;GO:0009793|embryo development ending in seed dormancy;GO:0009832|plant-type cell wall biogenesis;GO:0010182|sugar mediated signaling pathway;GO:0005992|trehalose biosynthetic process;GO:0005991|trehalose metabolic process;GO:0070413|trehalose metabolism in response to stress;	GO:0005946|alpha,alpha-trehalose-phosphate synthase complex (UDP-forming);GO:0005618|cell wall;GO:0005576|extracellular region;GO:0005773|vacuole;	GO:0003825|alpha,alpha-trehalose-phosphate synthase (UDP-forming) activity;
BGIOSGA009412	260	239	246	91	44	103	2.42888	3.25159e-05	up	Oryza sativa (indica cultivar-group) cDNA clone:OSIGCSN028O21, full insert sequence	GO:0042546|cell wall biogenesis;GO:0071555|cell wall organization;GO:0010411|xyloglucan metabolic process;	GO:0048046|apoplast;GO:0005618|cell wall;	GO:0004553|hydrolase activity, hydrolyzing O-glycosyl compounds;GO:0016762|xyloglucan:xyloglucosyl transferase activity;
BGIOSGA017137	604	617	1224	245	210	264	2.52536	9.43568e-07	up	Oryza sativa (indica cultivar-group) cDNA clone:OSIGCRA108C21, full insert sequence	GO:0045227|capsule polysaccharide biosynthetic process;GO:0006012|galactose metabolic process;GO:0033358|UDP-L-arabinose biosynthetic process;	GO:0032580|Golgi cisterna membrane;GO:0016021|integral component of membrane;	GO:0050373|UDP-arabinose 4-epimerase activity;GO:0003978|UDP-glucose 4-epimerase activity;
BGIOSGA000214	99	55	105	14	26	37	2.53053	0.00292244	up	PREDICTED: Oryza sativa Japonica Group probable glucuronosyltransferase Os01g0926400 (LOC4327240), mRNA	GO:0071555|cell wall organization;	GO:0000139|Golgi membrane;GO:0016021|integral component of membrane;	GO:0016757|transferase activity, transferring glycosyl groups;
BGIOSGA029584	391	649	830	232	79	257	2.5369	0.000639075	up	PREDICTED: Oryza sativa Japonica Group cellulose synthase-like protein E1 (LOC4347370), transcript variant X1, mRNA	GO:0071555|cell wall organization;GO:0030244|cellulose biosynthetic process;GO:0009833|plant-type primary cell wall biogenesis;	GO:0005794|Golgi apparatus;GO:0000139|Golgi membrane;GO:0016021|integral component of membrane;GO:0005886|plasma membrane;	GO:0016760|cellulose synthase (UDP-forming) activity;GO:0016759|cellulose synthase activity;
BGIOSGA000212	266	181	341	61	70	102	2.5421	1.21957e-05	up	PREDICTED: Oryza sativa Japonica Group probable glucuronosyltransferase Os01g0926700 (LOC4327243), mRNA	GO:0071555|cell wall organization;	GO:0000139|Golgi membrane;GO:0016021|integral component of membrane;	GO:0016757|transferase activity, transferring glycosyl groups;
BGIOSGA037787	127	90	125	42	26	34	2.55183	4.23641e-05	up	PREDICTED: Oryza sativa Japonica Group probable beta-1,3-galactosyltransferase 20 (LOC107276423), mRNA	GO:0006486|protein glycosylation;	GO:0000139|Golgi membrane;GO:0016021|integral component of membrane;	GO:0030246|carbohydrate binding;GO:0008378|galactosyltransferase activity;
BGIOSGA010810	142	81	234	47	50	33	2.56508	0.00106834	up	PREDICTED: Oryza sativa Japonica Group endoglucanase 9 (LOC4332724), mRNA	GO:0071555|cell wall organization;GO:0030245|cellulose catabolic process;	GO:0016021|integral component of membrane;	GO:0008810|cellulase activity;
BGIOSGA008992	371	417	463	109	128	130	2.56763	1.75416e-09	up	PREDICTED: Oryza sativa Japonica Group APO protein 2, chloroplastic (LOC4330635), mRNA	.	GO:0009507|chloroplast;	GO:0003723|RNA binding;
BGIOSGA027947	159	154	327	53	54	74	2.62442	3.70439e-05	up	PREDICTED: Oryza sativa Japonica Group E3 ubiquitin-protein ligase RGLG2 (LOC4344608), mRNA	GO:0009850|auxin metabolic process;GO:0009690|cytokinin metabolic process;GO:0080148|negative regulation of response to water deprivation;	GO:0005634|nucleus;GO:0005886|plasma membrane;	GO:0016874|ligase activity;GO:0004842|ubiquitin-protein transferase activity;GO:0008270|zinc ion binding;
BGIOSGA037545	338	179	386	63	90	103	2.63065	4.88148e-05	up	PREDICTED: Oryza sativa Japonica Group nucleoside diphosphate kinase 2, chloroplastic (LOC4352460), mRNA	GO:0006241|CTP biosynthetic process;GO:0006183|GTP biosynthetic process;GO:0006228|UTP biosynthetic process;	GO:0009507|chloroplast;	GO:0005524|ATP binding;GO:0046872|metal ion binding;GO:0004550|nucleoside diphosphate kinase activity;
BGIOSGA005157	68	41	87	15	14	27	2.64403	0.00177438	up	Oryza sativa Indica Group cultivar RP Bio-226 chromosome 1 sequence	GO:0071555|cell wall organization;GO:0030245|cellulose catabolic process;	GO:0005576|extracellular region;	GO:0008810|cellulase activity;
BGIOSGA008961	239	202	299	78	56	76	2.66629	1.29344e-08	up	PREDICTED: Oryza sativa Japonica Group cellulose synthase-like protein E2 (LOC4330583), transcript variant X2, mRNA	GO:0071555|cell wall organization;GO:0030244|cellulose biosynthetic process;GO:0009833|plant-type primary cell wall biogenesis;	GO:0005794|Golgi apparatus;GO:0000139|Golgi membrane;GO:0016021|integral component of membrane;GO:0005886|plasma membrane;	GO:0016760|cellulose synthase (UDP-forming) activity;GO:0016759|cellulose synthase activity;
BGIOSGA016632	613	562	1074	218	172	238	2.67769	2.51131e-08	up	PREDICTED: Oryza sativa Japonica Group glucose-6-phosphate 1-dehydrogenase, cytoplasmic isoform (LOC4336209), mRNA	GO:0006006|glucose metabolic process;GO:0006098|pentose-phosphate shunt;	GO:0005737|cytoplasm;	GO:0004345|glucose-6-phosphate dehydrogenase activity;GO:0050661|NADP binding;
BGIOSGA027913	8889	10202	21076	3559	3064	4442	2.69396	8.92546e-07	up	PREDICTED: Oryza sativa Japonica Group glyceraldehyde-3-phosphate dehydrogenase 1, cytosolic (LOC4344564), mRNA	GO:0006006|glucose metabolic process;GO:0006096|glycolytic process;	GO:0005737|cytoplasm;	GO:0004365|glyceraldehyde-3-phosphate dehydrogenase (NAD+) (phosphorylating) activity;GO:0051287|NAD binding;GO:0050661|NADP binding;
BGIOSGA024165	129	238	179	54	15	91	2.70591	0.00474356	up	Oryza sativa (indica cultivar-group) cDNA clone:OSIGCRA108D04, full insert sequence	GO:0005975|carbohydrate metabolic process;GO:0071555|cell wall organization;GO:0006952|defense response;	GO:0031225|anchored component of membrane;GO:0046658|anchored component of plasma membrane;GO:0005618|cell wall;GO:0005576|extracellular region;	GO:0042973|glucan endo-1,3-beta-D-glucosidase activity;GO:0004553|hydrolase activity, hydrolyzing O-glycosyl compounds;GO:0030247|polysaccharide binding;
BGIOSGA026922	128	107	148	33	24	51	2.71114	1.52867e-05	up	Oryza sativa Indica Group cultivar FR13A phosphofructokinase PFK07 (PFK07.2) mRNA, complete cds, alternatively spliced	GO:0006002|fructose 6-phosphate metabolic process;GO:0006096|glycolytic process;	GO:0009507|chloroplast;	GO:0003872|6-phosphofructokinase activity;GO:0005524|ATP binding;GO:0046872|metal ion binding;
BGIOSGA030917	198	299	395	87	84	71	2.74011	1.62379e-06	up	PREDICTED: Oryza sativa Japonica Group uncharacterized LOC4347282 (LOC4347282), mRNA	.	.	.
BGIOSGA021549	166	189	299	77	40	63	2.74203	3.65567e-06	up	PREDICTED: Oryza sativa Japonica Group alpha-mannosidase 2 (LOC4340636), mRNA	GO:0042538|hyperosmotic salinity response;GO:0006013|mannose metabolic process;GO:0006491|N-glycan processing;GO:0006517|protein deglycosylation;GO:0006487|protein N-linked glycosylation;	GO:0005768|endosome;GO:0005794|Golgi apparatus;GO:0000139|Golgi membrane;GO:0016021|integral component of membrane;GO:0005802|trans-Golgi network;	GO:0004559|alpha-mannosidase activity;GO:0030246|carbohydrate binding;GO:0004572|mannosyl-oligosaccharide 1,3-1,6-alpha-mannosidase activity;GO:0008270|zinc ion binding;
BGIOSGA011848	125	101	174	30	37	41	2.76774	6.657e-06	up	Oryza sativa Indica Group cultivar RP Bio-226 chromosome 3 sequence	GO:0006486|protein glycosylation;	GO:0032580|Golgi cisterna membrane;GO:0016021|integral component of membrane;	GO:0016757|transferase activity, transferring glycosyl groups;
BGIOSGA014384	513	245	808	142	107	172	2.77185	7.22743e-05	up	PREDICTED: Oryza sativa Japonica Group galacturonokinase (LOC4336928), mRNA	GO:0046835|carbohydrate phosphorylation;GO:0046396|D-galacturonate metabolic process;GO:0006012|galactose metabolic process;	GO:0005829|cytosol;	GO:0005524|ATP binding;GO:0047912|galacturonokinase activity;GO:0046872|metal ion binding;
BGIOSGA003109	489	629	1129	216	135	257	2.77879	2.73117e-06	up	PREDICTED: Oryza sativa Japonica Group receptor-like protein kinase HSL1 (LOC4326367), mRNA	.	GO:0016021|integral component of membrane;GO:0005886|plasma membrane;	GO:0005524|ATP binding;GO:0004674|protein serine/threonine kinase activity;
BGIOSGA021541	130	69	200	35	22	51	2.7831	0.000618426	up	PREDICTED: Oryza sativa Japonica Group endoglucanase 16 (LOC4340645), mRNA	GO:0071555|cell wall organization;GO:0030245|cellulose catabolic process;	GO:0005576|extracellular region;	GO:0008810|cellulase activity;
BGIOSGA030165	76	86	172	31	38	17	2.81323	0.00103959	up	PREDICTED: Oryza sativa Japonica Group nitrile-specifier protein 5 (LOC4346503), mRNA	GO:0019762|glucosinolate catabolic process;GO:0080028|nitrile biosynthetic process;	GO:0005829|cytosol;	.
BGIOSGA000907	352	360	428	134	74	100	2.82104	2.07477e-09	up	Oryza sativa Indica Group cultivar RP Bio-226 chromosome 1 sequence	GO:0006952|defense response;	GO:0016021|integral component of membrane;GO:0005886|plasma membrane;	GO:0005524|ATP binding;GO:0004674|protein serine/threonine kinase activity;GO:0005496|steroid binding;
BGIOSGA000859	319	309	420	121	63	97	2.83849	8.9162e-09	up	PREDICTED: Oryza sativa Japonica Group ATP-dependent 6-phosphofructokinase 6 (LOC4327196), transcript variant X2, mRNA	GO:0006002|fructose 6-phosphate metabolic process;GO:0006096|glycolytic process;GO:0010053|root epidermal cell differentiation;	GO:0005829|cytosol;	GO:0003872|6-phosphofructokinase activity;GO:0005524|ATP binding;GO:0046872|metal ion binding;
BGIOSGA025804	73	76	221	32	30	33	2.83886	0.000885608	up	PREDICTED: Oryza sativa Japonica Group reactive Intermediate Deaminase A, chloroplastic (LOC4343379), mRNA	GO:0009082|branched-chain amino acid biosynthetic process;GO:0008652|cellular amino acid biosynthetic process;GO:0009097|isoleucine biosynthetic process;GO:0046686|response to cadmium ion;GO:0009636|response to toxic substance;	GO:0009507|chloroplast;GO:0009941|chloroplast envelope;GO:0009570|chloroplast stroma;GO:0005739|mitochondrion;GO:0009536|plastid;GO:0009579|thylakoid;GO:0005773|vacuole;	GO:0019239|deaminase activity;GO:0016787|hydrolase activity;
BGIOSGA019452	109	132	166	42	17	51	2.84617	6.52081e-05	up	Oryza sativa (indica cultivar-group) cDNA clone:OSIGCRA120M02, full insert sequence	GO:0033499|galactose catabolic process via UDP-galactose;GO:0006006|glucose metabolic process;	GO:0005737|cytoplasm;GO:0070062|extracellular exosome;	GO:0004034|aldose 1-epimerase activity;GO:0030246|carbohydrate binding;
BGIOSGA021638	736	444	533	244	123	84	2.89782	0.000136639	up	PREDICTED: Oryza sativa Japonica Group uncharacterized LOC4340531 (LOC4340531), mRNA	GO:0016567|protein ubiquitination;	GO:0005737|cytoplasm;GO:0005634|nucleus;	GO:0016874|ligase activity;GO:0004842|ubiquitin-protein transferase activity;
BGIOSGA000642	170	156	186	49	47	36	2.91834	1.29185e-07	up	PREDICTED: Oryza sativa Japonica Group probable glycerol-3-phosphate dehydrogenase [NAD(+)] 2, cytosolic (LOC4327964), mRNA	GO:0005975|carbohydrate metabolic process;GO:0046168|glycerol-3-phosphate catabolic process;	GO:0005829|cytosol;GO:0009331|glycerol-3-phosphate dehydrogenase complex;	GO:0004367|glycerol-3-phosphate dehydrogenase [NAD+] activity;GO:0051287|NAD binding;
BGIOSGA016831	557	908	778	238	195	132	2.98942	6.65395e-07	up	PREDICTED: Oryza sativa Japonica Group beta-fructofuranosidase 1 (LOC4336515), mRNA	GO:0005975|carbohydrate metabolic process;	GO:0005773|vacuole;	GO:0004575|sucrose alpha-glucosidase activity;
BGIOSGA032917	488	461	449	109	105	136	3.05283	1.29056e-12	up	Oryza sativa Indica Group cultivar RP Bio-226 chromosome 10 sequence	GO:0006032|chitin catabolic process;GO:0000272|polysaccharide catabolic process;	.	GO:0008061|chitin binding;GO:0004568|chitinase activity;
BGIOSGA032274	229	241	566	68	74	107	3.07103	7.80806e-06	up	Oryza sativa (indica cultivar-group) cDNA clone:OSIGCRA120M02, full insert sequence	GO:0033499|galactose catabolic process via UDP-galactose;GO:0006006|glucose metabolic process;	GO:0005737|cytoplasm;GO:0070062|extracellular exosome;	GO:0004034|aldose 1-epimerase activity;GO:0030246|carbohydrate binding;
BGIOSGA001006	207	161	337	29	30	114	3.12092	0.000920099	up	PREDICTED: Oryza sativa Japonica Group acidic endochitinase (LOC4324117), mRNA	GO:0006032|chitin catabolic process;GO:0000272|polysaccharide catabolic process;	GO:0005615|extracellular space;	GO:0004568|chitinase activity;
BGIOSGA008343	409	331	784	105	111	144	3.13199	1.85145e-07	up	PREDICTED: Oryza sativa Japonica Group beta-glucosidase 7 (LOC4333841), mRNA	GO:0005975|carbohydrate metabolic process;GO:1901657|glycosyl compound metabolic process;	GO:0005576|extracellular region;	GO:0047668|amygdalin beta-glucosidase activity;GO:0033907|beta-D-fucosidase activity;GO:0004565|beta-galactosidase activity;GO:0080083|beta-gentiobiose beta-glucosidase activity;GO:0008422|beta-glucosidase activity;GO:0047701|beta-L-arabinosidase activity;GO:0004567|beta-mannosidase activity;GO:0080079|cellobiose glucosidase activity;GO:0042973|glucan endo-1,3-beta-D-glucosidase activity;GO:00428…
BGIOSGA031535	52	54	96	18	13	16	3.21334	7.4685e-05	up	PREDICTED: Oryza sativa Japonica Group probable trehalase (LOC4349141), mRNA	GO:0005993|trehalose catabolic process;	GO:0005886|plasma membrane;	GO:0004555|alpha,alpha-trehalase activity;
BGIOSGA022167	553	567	741	169	135	124	3.26682	3.07963e-14	up	Oryza sativa Indica Group cultivar RP Bio-226 chromosome 6 sequence	GO:0019521|D-gluconate metabolic process;GO:0006098|pentose-phosphate shunt;GO:0009737|response to abscisic acid;GO:0009409|response to cold;GO:0009651|response to salt stress;GO:0009414|response to water deprivation;	GO:0005737|cytoplasm;	GO:0004616|phosphogluconate dehydrogenase (decarboxylating) activity;
BGIOSGA017886	24	26	62	6	6	13	3.33541	0.00445205	up	PREDICTED: Oryza sativa Japonica Group UPF0098 protein CPn_0877/CP_0992/CPj0877/CpB0906 (LOC4339065), mRNA	GO:0045893|positive regulation of transcription, DNA-templated;GO:0009409|response to cold;GO:0050826|response to freezing;GO:0045492|xylan biosynthetic process;	GO:0005794|Golgi apparatus;GO:0000139|Golgi membrane;GO:0016021|integral component of membrane;	GO:0016413|O-acetyltransferase activity;GO:1990538|xylan O-acetyltransferase activity;
BGIOSGA031980	101	143	319	55	40	23	3.46535	0.000134163	up	PREDICTED: Oryza sativa Japonica Group delta(24)-sterol reductase (LOC4348555), mRNA	GO:0016132|brassinosteroid biosynthetic process;GO:0009808|lignin metabolic process;GO:0009834|plant-type secondary cell wall biogenesis;GO:0009826|unidimensional cell growth;	GO:0005783|endoplasmic reticulum;GO:0016021|integral component of membrane;GO:0016020|membrane;GO:0005886|plasma membrane;GO:0005774|vacuolar membrane;GO:0005773|vacuole;	GO:0005516|calmodulin binding;GO:0050614|delta24-sterol reductase activity;GO:0050660|flavin adenine dinucleotide binding;GO:0016614|oxidoreductase activity, acting on CH-OH group of donors;
BGIOSGA004323	363	85	135	24	41	64	3.50092	0.00139086	up	Oryza sativa (indica cultivar-group) cDNA clone:OSIGCRA122E17, full insert sequence	GO:0006076|(1->3)-beta-D-glucan catabolic process;GO:0050832|defense response to fungus;	.	GO:0042973|glucan endo-1,3-beta-D-glucosidase activity;
BGIOSGA030715	156	168	249	76	23	24	3.52889	6.47661e-05	up	Oryza sativa Indica Group trehalose-6-phosphate synthase 10 (TPS10) mRNA, complete cds	GO:0005992|trehalose biosynthetic process;GO:0070413|trehalose metabolism in response to stress;	GO:0005737|cytoplasm;	GO:0003825|alpha,alpha-trehalose-phosphate synthase (UDP-forming) activity;GO:0004805|trehalose-phosphatase activity;
BGIOSGA004006	187	165	467	53	53	63	3.54787	2.29181e-06	up	PREDICTED: Oryza sativa Japonica Group probable polygalacturonase (LOC4326618), mRNA	GO:0005975|carbohydrate metabolic process;	GO:0016021|integral component of membrane;	GO:0004650|polygalacturonase activity;
BGIOSGA027875	844	924	3616	381	310	372	3.64803	3.38955e-05	up	Oryza sativa (indica cultivar-group) cDNA clone:OSIGCEA002D09, full insert sequence	GO:0019252|starch biosynthetic process;	.	GO:0005524|ATP binding;GO:0008865|fructokinase activity;
BGIOSGA010770	321	364	1033	109	89	138	3.75304	1.57845e-06	up	PREDICTED: Oryza sativa Japonica Group sucrose synthase 4 (LOC4332788), mRNA	GO:0005985|sucrose metabolic process;	.	GO:0016157|sucrose synthase activity;
BGIOSGA018021	397	168	263	71	42	53	3.82546	3.73342e-07	up	Oryza sativa (indica cultivar-group) cDNA clone:OSIGCFA229E13, full insert sequence	GO:0071555|cell wall organization;GO:0010417|glucuronoxylan biosynthetic process;GO:0009834|plant-type secondary cell wall biogenesis;GO:0045492|xylan biosynthetic process;	GO:0005794|Golgi apparatus;GO:0000139|Golgi membrane;GO:0016021|integral component of membrane;	GO:0015020|glucuronosyltransferase activity;GO:0080116|glucuronoxylan glucuronosyltransferase activity;GO:0046872|metal ion binding;
BGIOSGA023633	110	147	108	16	16	42	3.84337	8.69482e-06	up	Oryza sativa Indica Group cultivar RP Bio-226 chromosome 6 sequence	GO:0006040|amino sugar metabolic process;GO:0016998|cell wall macromolecule catabolic process;GO:0006032|chitin catabolic process;GO:0050832|defense response to fungus;GO:0000272|polysaccharide catabolic process;	GO:0005622|intracellular;	GO:0008061|chitin binding;GO:0004568|chitinase activity;
BGIOSGA012117	240	165	490	80	53	35	3.89026	5.32763e-06	up	PREDICTED: Oryza sativa Japonica Group microtubule-associated protein 70-4 (LOC4332061), transcript variant X2, mRNA	GO:0007010|cytoskeleton organization;GO:0009832|plant-type cell wall biogenesis;GO:0010051|xylem and phloem pattern formation;	GO:0005737|cytoplasm;GO:0005874|microtubule;	.
BGIOSGA007570	594	397	493	91	126	60	3.97561	3.11721e-08	up	PREDICTED: Oryza sativa Japonica Group probable arabinose 5-phosphate isomerase (LOC4328364), mRNA	GO:0009103|lipopolysaccharide biosynthetic process;	GO:0005737|cytoplasm;	GO:0019146|arabinose-5-phosphate isomerase activity;GO:0005524|ATP binding;GO:0030246|carbohydrate binding;
BGIOSGA003613	135	118	469	39	41	49	4.03955	2.73778e-05	up	PREDICTED: Oryza sativa Japonica Group beta-glucosidase 1 (LOC4324050), mRNA	GO:0005975|carbohydrate metabolic process;GO:1901657|glycosyl compound metabolic process;	.	GO:0008422|beta-glucosidase activity;
BGIOSGA004008	128	55	135	18	25	15	4.04423	1.55008e-05	up	PREDICTED: Oryza sativa Japonica Group chitinase domain-containing protein 1 (LOC4326620), mRNA	GO:0005975|carbohydrate metabolic process;GO:0006032|chitin catabolic process;GO:0006954|inflammatory response;	GO:0005576|extracellular region;GO:0005764|lysosome;	GO:0008061|chitin binding;GO:0004568|chitinase activity;
BGIOSGA027612	1863	657	855	222	143	264	4.19289	3.67382e-07	up	PREDICTED: Oryza sativa Japonica Group probable mixed-linked glucan synthase 6 (LOC4344719), mRNA	GO:0071555|cell wall organization;GO:0030244|cellulose biosynthetic process;GO:0071669|plant-type cell wall organization or biogenesis;	GO:0005794|Golgi apparatus;GO:0000139|Golgi membrane;GO:0016021|integral component of membrane;	GO:0016760|cellulose synthase (UDP-forming) activity;GO:0051753|mannan synthase activity;
BGIOSGA004921	2363	884	1810	311	255	340	4.24574	8.56995e-10	up	PREDICTED: Oryza sativa Japonica Group UDP-glucuronate:xylan alpha-glucuronosyltransferase 1 (LOC4324841), transcript variant X2, mRNA	GO:0071555|cell wall organization;GO:0010417|glucuronoxylan biosynthetic process;GO:0009834|plant-type secondary cell wall biogenesis;GO:0045492|xylan biosynthetic process;	GO:0005794|Golgi apparatus;GO:0000139|Golgi membrane;GO:0016021|integral component of membrane;	GO:0015020|glucuronosyltransferase activity;GO:0080116|glucuronoxylan glucuronosyltransferase activity;GO:0046872|metal ion binding;
BGIOSGA024622	1249	2291	3619	545	261	412	4.41235	2.09128e-09	up	PREDICTED: Oryza sativa Japonica Group probable galactinol--sucrose galactosyltransferase 2 (LOC4342703), transcript variant X1, mRNA	GO:0034484|raffinose catabolic process;GO:0080167|response to karrikin;GO:0006979|response to oxidative stress;	GO:0009506|plasmodesma;	GO:0052692|raffinose alpha-galactosidase activity;GO:0016757|transferase activity, transferring glycosyl groups;
BGIOSGA016536	73	92	327	18	30	30	4.50483	6.83728e-05	up	Oryza sativa Japonica Group cDNA clone:001-029-G05, full insert sequence	GO:0033499|galactose catabolic process via UDP-galactose;GO:0006006|glucose metabolic process;	GO:0005737|cytoplasm;GO:0070062|extracellular exosome;	GO:0004034|aldose 1-epimerase activity;GO:0030246|carbohydrate binding;
BGIOSGA024623	3240	1717	2165	600	334	268	4.52735	2.26927e-09	up	PREDICTED: Oryza sativa Japonica Group probable cellulose synthase A catalytic subunit 8 [UDP-forming] (LOC4342699), mRNA	GO:0071555|cell wall organization;GO:0030244|cellulose biosynthetic process;GO:0009833|plant-type primary cell wall biogenesis;	GO:0005794|Golgi apparatus;GO:0016021|integral component of membrane;GO:0005886|plasma membrane;	GO:0016760|cellulose synthase (UDP-forming) activity;GO:0016759|cellulose synthase activity;GO:0046872|metal ion binding;
BGIOSGA023093	152	144	311	30	23	47	4.54699	8.54262e-09	up	PREDICTED: Oryza sativa Japonica Group probable inositol oxygenase (LOC4341305), mRNA	GO:0019310|inositol catabolic process;GO:0019853|L-ascorbic acid biosynthetic process;	GO:0005737|cytoplasm;	GO:0050113|inositol oxygenase activity;GO:0005506|iron ion binding;
BGIOSGA033008	501	527	1141	102	110	122	4.77632	9.07561e-13	up	PREDICTED: Oryza sativa Japonica Group beta-glucuronosyltransferase GlcAT14A (LOC4348707), mRNA	.	GO:0000139|Golgi membrane;GO:0016021|integral component of membrane;	GO:0008375|acetylglucosaminyltransferase activity;GO:0015020|glucuronosyltransferase activity;
BGIOSGA025466	827	378	432	72	84	106	4.80379	1.07416e-09	up	PREDICTED: Oryza sativa Japonica Group probable cellulose synthase A catalytic subunit 6 [UDP-forming] (LOC4342850), mRNA	GO:0071555|cell wall organization;GO:0030244|cellulose biosynthetic process;GO:0009833|plant-type primary cell wall biogenesis;	GO:0005794|Golgi apparatus;GO:0016021|integral component of membrane;GO:0005886|plasma membrane;	GO:0016760|cellulose synthase (UDP-forming) activity;GO:0016759|cellulose synthase activity;GO:0008270|zinc ion binding;
BGIOSGA001493	184	119	454	43	25	47	4.85973	5.50344e-07	up	PREDICTED: Oryza sativa Japonica Group callose synthase 7 (LOC4327807), transcript variant X4, mRNA	GO:0006075|(1->3)-beta-D-glucan biosynthetic process;GO:0071555|cell wall organization;GO:0008360|regulation of cell shape;	GO:0000148|1,3-beta-D-glucan synthase complex;GO:0016021|integral component of membrane;	GO:0003843|1,3-beta-D-glucan synthase activity;
BGIOSGA002224	77	96	167	19	8	26	4.86285	4.31027e-07	up	PREDICTED: Oryza sativa Japonica Group hexokinase-8 (LOC4326776), transcript variant X1, mRNA	GO:0001678|cellular glucose homeostasis;GO:0006096|glycolytic process;	GO:0005829|cytosol;	GO:0005524|ATP binding;GO:0008865|fructokinase activity;GO:0004340|glucokinase activity;GO:0005536|glucose binding;GO:0019158|mannokinase activity;
BGIOSGA014411	433	343	488	77	55	59	5.00084	1.35784e-20	up	PREDICTED: Oryza sativa Japonica Group maltose excess protein 1-like, chloroplastic (LOC4336889), transcript variant X2, misc_RNA	GO:0000023|maltose metabolic process;GO:0006810|transport;	GO:0009706|chloroplast inner membrane;GO:0016021|integral component of membrane;	.
BGIOSGA030471	186	173	351	60	19	27	5.03429	5.55708e-08	up	PREDICTED: Oryza sativa Japonica Group pyrophosphate--fructose 6-phosphate 1-phosphotransferase subunit alpha (LOC9271821), transcript variant X2, mRNA	.	GO:0005737|cytoplasm;	GO:0003872|6-phosphofructokinase activity;GO:0005524|ATP binding;GO:0047334|diphosphate-fructose-6-phosphate 1-phosphotransferase activity;GO:0046872|metal ion binding;
BGIOSGA020715	157	269	713	62	28	74	5.15446	1.71903e-06	up	PREDICTED: Oryza sativa Japonica Group phosphoglycerate kinase, cytosolic (LOC4341792), mRNA	GO:0006096|glycolytic process;	GO:0005737|cytoplasm;	GO:0005524|ATP binding;GO:0004618|phosphoglycerate kinase activity;
BGIOSGA004843	340	806	1754	78	89	249	5.19371	7.22611e-06	up	PREDICTED: Oryza sativa Japonica Group glucan endo-1,3-beta-glucosidase 14 (LOC4324736), transcript variant X1, mRNA	GO:0005975|carbohydrate metabolic process;GO:0071555|cell wall organization;GO:0006952|defense response;	GO:0046658|anchored component of plasma membrane;GO:0005618|cell wall;GO:0005737|cytoplasm;GO:0005576|extracellular region;GO:0005634|nucleus;	GO:0042973|glucan endo-1,3-beta-D-glucosidase activity;GO:0004553|hydrolase activity, hydrolyzing O-glycosyl compounds;GO:0030247|polysaccharide binding;
BGIOSGA029452	1181	1064	1962	161	174	245	5.41968	1.78604e-20	up	PREDICTED: Oryza sativa Japonica Group beta-glucosidase 32 (LOC4347546), mRNA	GO:0005975|carbohydrate metabolic process;GO:1901657|glycosyl compound metabolic process;	.	GO:0008422|beta-glucosidase activity;
BGIOSGA031017	729	352	644	85	85	67	5.44955	1.22117e-13	up	PREDICTED: Oryza sativa Japonica Group chitinase-like protein 1 (LOC4347451), transcript variant X2, mRNA	GO:0006040|amino sugar metabolic process;GO:0016998|cell wall macromolecule catabolic process;GO:0030244|cellulose biosynthetic process;GO:0006032|chitin catabolic process;GO:0009873|ethylene-activated signaling pathway;GO:0009825|multidimensional cell growth;GO:0010337|regulation of salicylic acid metabolic process;GO:0009735|response to cytokinin;GO:0009408|response to heat;GO:0010167|response …	GO:0048046|apoplast;GO:0005794|Golgi apparatus;	GO:0030247|polysaccharide binding;
BGIOSGA008519	299	129	517	15	13	105	5.47561	0.0126238	up	Oryza sativa (indica cultivar-group) cDNA clone:OSIGCFA230P04, full insert sequence	GO:0009932|cell tip growth;GO:0006071|glycerol metabolic process;GO:0010442|guard cell morphogenesis;GO:0006629|lipid metabolic process;GO:0052541|plant-type cell wall cellulose metabolic process;GO:0010053|root epidermal cell differentiation;GO:0048765|root hair cell differentiation;GO:0010026|trichome differentiation;	GO:0031225|anchored component of membrane;GO:0046658|anchored component of plasma membrane;GO:0009505|plant-type cell wall;GO:0005886|plasma membrane;	GO:0008889|glycerophosphodiester phosphodiesterase activity;
BGIOSGA010085	144	129	446	36	24	33	5.64862	5.97352e-08	up	PREDICTED: Oryza sativa Japonica Group glucan endo-1,3-beta-glucosidase 7 (LOC4333681), mRNA	GO:0005975|carbohydrate metabolic process;GO:0071555|cell wall organization;	GO:0046658|anchored component of plasma membrane;GO:0005618|cell wall;GO:0005576|extracellular region;	GO:0042973|glucan endo-1,3-beta-D-glucosidase activity;GO:0004553|hydrolase activity, hydrolyzing O-glycosyl compounds;GO:0030247|polysaccharide binding;
BGIOSGA022095	1244	833	2505	106	73	422	5.83924	3.2407e-06	up	Oryza rufipogon (W1943) cDNA clone: ORW1943C108E19, full insert sequence	GO:0005975|carbohydrate metabolic process;	GO:0016021|integral component of membrane;	GO:0004650|polygalacturonase activity;
BGIOSGA024403	2679	1418	1738	374	217	162	5.91593	5.32807e-12	up	Oryza sativa Japonica Group cDNA clone:J013099F14, full insert sequence	GO:0071555|cell wall organization;GO:0030244|cellulose biosynthetic process;GO:0009833|plant-type primary cell wall biogenesis;	GO:0005794|Golgi apparatus;GO:0016021|integral component of membrane;GO:0005886|plasma membrane;	GO:0016760|cellulose synthase (UDP-forming) activity;GO:0016759|cellulose synthase activity;GO:0008270|zinc ion binding;
BGIOSGA004733	92	127	350	27	22	20	5.97732	1.04279e-07	up	Oryza sativa Indica Group cultivar RP Bio-226 chromosome 1 sequence	GO:0005975|carbohydrate metabolic process;GO:0009793|embryo development ending in seed dormancy;GO:0006108|malate metabolic process;GO:0009409|response to cold;GO:0009735|response to cytokinin;GO:0006099|tricarboxylic acid cycle;	GO:0048046|apoplast;GO:0009507|chloroplast;GO:0009941|chloroplast envelope;GO:0009570|chloroplast stroma;GO:0016020|membrane;GO:0005739|mitochondrion;GO:0009536|plastid;GO:0009532|plastid stroma;GO:0010319|stromule;GO:0005774|vacuolar membrane;	GO:0030060|L-malate dehydrogenase activity;GO:0008746|NAD(P)+ transhydrogenase activity;
BGIOSGA026643	402	247	541	61	43	37	6.28197	5.91125e-15	up	Oryza sativa (indica cultivar-group) cDNA clone:OSIGCEA049K09, full insert sequence	GO:0006040|amino sugar metabolic process;GO:0016998|cell wall macromolecule catabolic process;GO:0030244|cellulose biosynthetic process;GO:0006032|chitin catabolic process;GO:0009873|ethylene-activated signaling pathway;GO:0009825|multidimensional cell growth;GO:0010337|regulation of salicylic acid metabolic process;GO:0009735|response to cytokinin;GO:0009408|response to heat;GO:0010167|response …	GO:0048046|apoplast;GO:0005794|Golgi apparatus;	GO:0030247|polysaccharide binding;
BGIOSGA035949	182	181	175	24	17	22	6.53055	2.7305e-17	up	PREDICTED: Oryza sativa Japonica Group probable galacturonosyltransferase 13 (LOC4352627), mRNA	GO:0052325|cell wall pectin biosynthetic process;GO:0009555|pollen development;GO:0009860|pollen tube growth;	GO:0005794|Golgi apparatus;GO:0000139|Golgi membrane;GO:0016021|integral component of membrane;GO:0090406|pollen tube;	GO:0047262|polygalacturonate 4-alpha-galacturonosyltransferase activity;
BGIOSGA029374	1012	553	758	110	67	96	6.53407	3.68937e-19	up	PREDICTED: Oryza sativa Japonica Group endoglucanase 24 (LOC4347685), mRNA	GO:0071555|cell wall organization;GO:0030245|cellulose catabolic process;	GO:0005576|extracellular region;	GO:0008810|cellulase activity;
BGIOSGA020293	145	171	507	21	21	45	6.96718	9.19488e-09	up	PREDICTED: Oryza sativa Japonica Group probable polygalacturonase At1g80170 (LOC4339484), mRNA	GO:0005975|carbohydrate metabolic process;GO:0071555|cell wall organization;	GO:0005576|extracellular region;GO:0009505|plant-type cell wall;	GO:0004650|polygalacturonase activity;
BGIOSGA005351	195	111	479	28	27	25	7.0961	3.01191e-09	up	PREDICTED: Oryza sativa Japonica Group P-loop NTPase domain-containing protein LPA1 (LOC4331161), mRNA	GO:0010264|myo-inositol hexakisphosphate biosynthetic process;	.	.
BGIOSGA020688	375	312	764	44	53	40	7.71944	2.16482e-16	up	PREDICTED: Oryza sativa Japonica Group probable alpha-glucosidase Os06g0675700 (LOC4341824), transcript variant X2, mRNA	.	.	GO:0004558|alpha-1,4-glucosidase activity;GO:0030246|carbohydrate binding;GO:0032450|maltose alpha-glucosidase activity;
BGIOSGA005142	291	297	730	52	14	62	7.80036	3.09832e-10	up	PREDICTED: Oryza sativa Japonica Group glucan endo-1,3-beta-glucosidase, acidic isoform (LOC4326518), mRNA	GO:0005975|carbohydrate metabolic process;GO:0006952|defense response;	GO:0005615|extracellular space;	GO:0042973|glucan endo-1,3-beta-D-glucosidase activity;
BGIOSGA026185	518	628	2048	118	55	111	8.27823	2.63862e-11	up	PREDICTED: Oryza sativa Japonica Group 4-alpha-glucanotransferase DPE1, chloroplastic/amyloplastic (LOC4343975), mRNA	GO:0006006|glucose metabolic process;GO:0000025|maltose catabolic process;GO:0005983|starch catabolic process;	GO:0009501|amyloplast;GO:0009507|chloroplast;	GO:0004134|4-alpha-glucanotransferase activity;
BGIOSGA018714	2952	1331	1609	243	115	104	9.83552	1.00164e-15	up	PREDICTED: Oryza sativa Japonica Group probable cellulose synthase A catalytic subunit 1 [UDP-forming] (LOC4337958), mRNA	GO:0071555|cell wall organization;GO:0030244|cellulose biosynthetic process;GO:0009833|plant-type primary cell wall biogenesis;	GO:0005794|Golgi apparatus;GO:0016021|integral component of membrane;GO:0005886|plasma membrane;	GO:0016760|cellulose synthase (UDP-forming) activity;GO:0016759|cellulose synthase activity;GO:0046872|metal ion binding;
BGIOSGA015140	2940	3084	7214	293	333	358	9.83979	4.93646e-25	up	Oryza sativa mRNA for starch branching enzyme rbe4, complete cds	GO:0009790|embryo development;GO:0019252|starch biosynthetic process;	GO:0009501|amyloplast;GO:0009507|chloroplast;	GO:0003844|1,4-alpha-glucan branching enzyme activity;GO:0043169|cation binding;GO:0004553|hydrolase activity, hydrolyzing O-glycosyl compounds;
BGIOSGA026706	314	213	423	26	18	21	10.9517	2.75288e-24	up	PREDICTED: Oryza sativa Japonica Group beta-glucosidase 28 (LOC4345996), transcript variant X3, mRNA	GO:0005975|carbohydrate metabolic process;GO:1901657|glycosyl compound metabolic process;	.	GO:0008422|beta-glucosidase activity;
BGIOSGA013327	153	109	546	15	17	20	11.1515	1.7503e-10	up	PREDICTED: Oryza sativa Japonica Group phosphomethylpyrimidine synthase, chloroplastic (LOC4333719), transcript variant X7, misc_RNA	GO:0010266|response to vitamin B1;GO:0009228|thiamine biosynthetic process;GO:0009229|thiamine diphosphate biosynthetic process;	GO:0009507|chloroplast;GO:0009570|chloroplast stroma;GO:0009536|plastid;	GO:0051539|4 iron, 4 sulfur cluster binding;GO:0080041|ADP-ribose pyrophosphohydrolase activity;GO:0051536|iron-sulfur cluster binding;GO:0016829|lyase activity;GO:0046872|metal ion binding;
BGIOSGA022620	109	121	589	17	16	16	11.8868	1.12898e-09	up	PREDICTED: Oryza sativa Japonica Group pyruvate dehydrogenase E1 component subunit alpha-2, mitochondrial (LOC4340640), mRNA	GO:0006086|acetyl-CoA biosynthetic process from pyruvate;GO:0006096|glycolytic process;	GO:0005759|mitochondrial matrix;	GO:0004739|pyruvate dehydrogenase (acetyl-transferring) activity;
BGIOSGA013562	2550	782	1884	67	110	141	12.3757	2.01723e-17	up	PREDICTED: Oryza sativa Japonica Group beta-glucosidase BoGH3B (LOC4334114), transcript variant X2, mRNA	GO:0085030|mutualism;GO:2000899|xyloglucan catabolic process;	GO:0042597|periplasmic space;	GO:0008422|beta-glucosidase activity;
BGIOSGA011046	95	89	119	1	10	7	12.5105	1.38088e-11	up	PREDICTED: Oryza sativa Japonica Group cytosolic enolase 3 (LOC4332356), mRNA	GO:0006096|glycolytic process;	GO:0000015|phosphopyruvate hydratase complex;	GO:0000287|magnesium ion binding;GO:0004634|phosphopyruvate hydratase activity;
BGIOSGA014799	302	296	1052	11	11	47	17.8236	7.82795e-13	up	PREDICTED: Oryza sativa Japonica Group endoglucanase 12 (LOC4336284), mRNA	GO:0071555|cell wall organization;GO:0030245|cellulose catabolic process;	GO:0016021|integral component of membrane;	GO:0008810|cellulase activity;
BGIOSGA023534	822	531	2071	25	19	65	23.4375	6.5861e-20	up	PREDICTED: Oryza sativa Japonica Group xyloglucan endotransglucosylase/hydrolase protein 24 (LOC4341942), mRNA	GO:0042546|cell wall biogenesis;GO:0009664|plant-type cell wall organization;GO:0009733|response to auxin;GO:0009741|response to brassinosteroid;GO:0009409|response to cold;GO:0009408|response to heat;GO:0009612|response to mechanical stimulus;GO:0010411|xyloglucan metabolic process;	GO:0048046|apoplast;GO:0005618|cell wall;GO:0005794|Golgi apparatus;	GO:0004553|hydrolase activity, hydrolyzing O-glycosyl compounds;GO:0016762|xyloglucan:xyloglucosyl transferase activity;
BGIOSGA020606	865	118	349	7	10	27	23.6847	5.61084e-12	up	Oryza sativa (indica cultivar-group) cDNA clone:OSIGCEA023E18, full insert sequence	GO:0071555|cell wall organization;GO:0009832|plant-type cell wall biogenesis;GO:0010411|xyloglucan metabolic process;	GO:0048046|apoplast;GO:0005618|cell wall;	GO:0004553|hydrolase activity, hydrolyzing O-glycosyl compounds;GO:0016762|xyloglucan:xyloglucosyl transferase activity;
BGIOSGA009780	184	441	2147	22	24	16	31.0873	1.39478e-07	up	PREDICTED: Oryza sativa Japonica Group alpha-1,4 glucan phosphorylase L isozyme, chloroplastic/amyloplastic (LOC4334171), mRNA	GO:0005975|carbohydrate metabolic process;	GO:0009501|amyloplast;GO:0009507|chloroplast;	GO:0008184|glycogen phosphorylase activity;GO:0030170|pyridoxal phosphate binding;
BGIOSGA030039	1546	2046	9023	85	66	82	38.7458	6.04362e-25	up	PREDICTED: Oryza sativa Japonica Group glucose-1-phosphate adenylyltransferase small subunit, chloroplastic/amyloplastic-like (LOC4346656), mRNA	GO:0005978|glycogen biosynthetic process;GO:0019252|starch biosynthetic process;GO:0005982|starch metabolic process;	GO:0009501|amyloplast;GO:0009507|chloroplast;	GO:0005524|ATP binding;GO:0008878|glucose-1-phosphate adenylyltransferase activity;
BGIOSGA018040	631	472	1276	6	7	10	76.2891	5.65941e-42	up	PREDICTED: Oryza sativa Japonica Group pheophytinase, chloroplastic (LOC4338815), mRNA	.	.	.
BGIOSGA017490	3512	5315	25093	40	60	69	141.727	1.52942e-17	up	PREDICTED: Oryza sativa Japonica Group glucose-1-phosphate adenylyltransferase large subunit, chloroplastic/amyloplastic (LOC4339718), transcript variant X2, mRNA	GO:0005978|glycogen biosynthetic process;GO:0019252|starch biosynthetic process;	GO:0009501|amyloplast;GO:0009507|chloroplast;	GO:0005524|ATP binding;GO:0008878|glucose-1-phosphate adenylyltransferase activity;
BGIOSGA005599	77	75	138	9	10	36	4.01897	0.00014632	up	PREDICTED: Oryza sativa Japonica Group probable pectin methyltransferase QUA2 (LOC4330770), mRNA	GO:0007155|cell adhesion;GO:0010289|homogalacturonan biosynthetic process;GO:0009735|response to cytokinin;GO:0048364|root development;GO:0048367|shoot system development;	GO:0005768|endosome;GO:0005794|Golgi apparatus;GO:0000139|Golgi membrane;GO:0016021|integral component of membrane;GO:0005802|trans-Golgi network;GO:0005774|vacuolar membrane;	GO:0008168|methyltransferase activity;GO:0008757|S-adenosylmethionine-dependent methyltransferase activity;
BGIOSGA033387	1453	1118	3260	323	360	479	3.68256	6.23646e-08	up	Oryza sativa (indica cultivar-group) cDNA clone:OSIGCRA220A01, full insert sequence	GO:0006040|amino sugar metabolic process;GO:0016998|cell wall macromolecule catabolic process;GO:0006032|chitin catabolic process;GO:0000272|polysaccharide catabolic process;	GO:0005622|intracellular;	GO:0004568|chitinase activity;
BGIOSGA029451	39	5	9	0	2	0	19.8088	0.00313197	up	PREDICTED: Oryza sativa Japonica Group probable inactive beta-glucosidase 33 (LOC4347547), mRNA	GO:0005975|carbohydrate metabolic process;GO:1901657|glycosyl compound metabolic process;	.	GO:0008422|beta-glucosidase activity;
BGIOSGA009600	84	79	203	7	6	9	12.278	3.36563e-12	up	PREDICTED: Oryza sativa Japonica Group probable cellulose synthase A catalytic subunit 2 [UDP-forming] (LOC4334515), mRNA	GO:0071555|cell wall organization;GO:0030244|cellulose biosynthetic process;GO:0009833|plant-type primary cell wall biogenesis;	GO:0005794|Golgi apparatus;GO:0016021|integral component of membrane;GO:0005886|plasma membrane;	GO:0016760|cellulose synthase (UDP-forming) activity;GO:0016759|cellulose synthase activity;GO:0046872|metal ion binding;
BGIOSGA028122	67	60	119	6	5	16	6.88346	8.43472e-08	up	PREDICTED: Oryza sativa Japonica Group starch synthase 3, chloroplastic/amyloplastic (LOC9268758), transcript variant X4, mRNA	GO:0019252|starch biosynthetic process;	GO:0009501|amyloplast;GO:0009507|chloroplast;	GO:0033201|alpha-1,4-glucan synthase activity;GO:0004373|glycogen (starch) synthase activity;GO:2001070|starch binding;GO:0009011|starch synthase activity;
BGIOSGA004154	135	31	54	12	6	6	7.08529	2.21746e-05	up	PREDICTED: Oryza sativa Japonica Group mannan endo-1,4-beta-mannosidase 1 (LOC4327860), mRNA	GO:0046355|mannan catabolic process;	GO:0005576|extracellular region;	GO:0016985|mannan endo-1,4-beta-mannosidase activity;
BGIOSGA022817	37	5	26	0	1	5	8.7377	0.0047286	up	Oryza sativa (indica cultivar-group) cDNA clone:OSIGCRA102N03, full insert sequence	GO:0042546|cell wall biogenesis;GO:0071555|cell wall organization;GO:0045489|pectin biosynthetic process;	GO:0005794|Golgi apparatus;GO:0000139|Golgi membrane;GO:0016021|integral component of membrane;	GO:0048531|beta-1,3-galactosyltransferase activity;
BGIOSGA000215	936	1052	2006	391	278	431	2.71423	2.70998e-07	up	PREDICTED: Oryza sativa Japonica Group transaldolase (LOC4327239), mRNA	GO:0005975|carbohydrate metabolic process;GO:0006098|pentose-phosphate shunt;	GO:0005737|cytoplasm;	GO:0004801|sedoheptulose-7-phosphate:D-glyceraldehyde-3-phosphate glyceronetransferase activity;
BGIOSGA000339	1254	1870	2267	692	485	837	2.03552	5.09132e-05	up	Oryza sativa Japonica Group cDNA clone:J023029D05, full insert sequence	GO:0006014|D-ribose metabolic process;GO:0019252|starch biosynthetic process;	.	GO:0005524|ATP binding;GO:0008865|fructokinase activity;GO:0004747|ribokinase activity;
BGIOSGA028246	1374	1151	2035	256	254	484	3.47051	5.8181e-10	up	Oryza sativa (indica cultivar-group) cDNA clone:OSIGCEA029B15, full insert sequence	GO:0042546|cell wall biogenesis;GO:0071555|cell wall organization;GO:0010411|xyloglucan metabolic process;	GO:0048046|apoplast;GO:0005618|cell wall;	GO:0004553|hydrolase activity, hydrolyzing O-glycosyl compounds;GO:0016762|xyloglucan:xyloglucosyl transferase activity;
BGIOSGA025894	216	592	520	0	1	0	931.842	2.74768e-15	up	PREDICTED: Oryza sativa Japonica Group beta-amylase (LOC9267841), mRNA	GO:0000272|polysaccharide catabolic process;	.	GO:0016161|beta-amylase activity;
BGIOSGA026621	20	40	44	3	3	15	3.82244	0.00661664	up	Oryza sativa Indica Group cultivar RP Bio-226 chromosome 8 sequence	GO:0005975|carbohydrate metabolic process;GO:0050832|defense response to fungus;GO:0050829|defense response to Gram-negative bacterium;GO:0033481|galacturonate biosynthetic process;	GO:0005768|endosome;GO:0005794|Golgi apparatus;GO:0032580|Golgi cisterna membrane;GO:0016021|integral component of membrane;GO:0005802|trans-Golgi network;	GO:0050378|UDP-glucuronate 4-epimerase activity;
BGIOSGA010012	38	29	75	14	8	11	3.19998	0.0015425	up	PREDICTED: Oryza sativa Japonica Group probable beta-1,3-galactosyltransferase 18 (LOC4333786), mRNA	GO:0048354|mucilage biosynthetic process involved in seed coat development;GO:1900056|negative regulation of leaf senescence;GO:0006486|protein glycosylation;	GO:0009507|chloroplast;GO:0005794|Golgi apparatus;GO:0000139|Golgi membrane;GO:0016021|integral component of membrane;	GO:0030246|carbohydrate binding;GO:1990714|hydroxyproline O-galactosyltransferase activity;
BGIOSGA009151	73	68	152	3	4	6	16.7063	2.06109e-12	up	PREDICTED: Oryza sativa Japonica Group probable polygalacturonase (LOC4330924), mRNA	GO:0005975|carbohydrate metabolic process;	GO:0016021|integral component of membrane;	GO:0004650|polygalacturonase activity;
BGIOSGA012554	14	34	62	4	3	7	5.84497	0.000467066	up	PREDICTED: Oryza sativa Japonica Group 2,3-bisphosphoglycerate-independent phosphoglycerate mutase (LOC4332728), transcript variant X1, mRNA	GO:0006007|glucose catabolic process;GO:0006096|glycolytic process;	GO:0005737|cytoplasm;	GO:0030145|manganese ion binding;GO:0004619|phosphoglycerate mutase activity;
BGIOSGA028215	91	83	153	6	3	3	20.3627	5.72169e-15	up	PREDICTED: Oryza sativa Japonica Group glucan endo-1,3-beta-glucosidase 6 (LOC4344970), mRNA	GO:0005975|carbohydrate metabolic process;GO:0006952|defense response;	GO:0031225|anchored component of membrane;GO:0046658|anchored component of plasma membrane;GO:0009505|plant-type cell wall;GO:0005886|plasma membrane;GO:0009506|plasmodesma;GO:0005773|vacuole;	GO:0042973|glucan endo-1,3-beta-D-glucosidase activity;GO:0004553|hydrolase activity, hydrolyzing O-glycosyl compounds;GO:0030247|polysaccharide binding;
BGIOSGA022239	9	2	35	0	0	0	59.0519	0.000484289	up	PREDICTED: Oryza sativa Japonica Group glucan endo-1,3-beta-glucosidase 14 (LOC4340010), mRNA	GO:0005975|carbohydrate metabolic process;GO:0007154|cell communication;GO:0071555|cell wall organization;GO:0006952|defense response;	GO:0031225|anchored component of membrane;GO:0046658|anchored component of plasma membrane;GO:0005576|extracellular region;GO:0009505|plant-type cell wall;GO:0005886|plasma membrane;	GO:0042973|glucan endo-1,3-beta-D-glucosidase activity;GO:0030247|polysaccharide binding;
BGIOSGA005143	131	35	72	2	0	12	13.5643	6.6488e-06	up	PREDICTED: Oryza sativa Japonica Group glucan endo-1,3-beta-glucosidase GII (LOC4326519), mRNA	GO:0006076|(1->3)-beta-D-glucan catabolic process;GO:0050832|defense response to fungus;	.	GO:0042973|glucan endo-1,3-beta-D-glucosidase activity;
BGIOSGA030777	69	131	95	6	21	3	7.1433	1.12365e-05	up	PREDICTED: Oryza sativa Japonica Group cellulose synthase A catalytic subunit 9 [UDP-forming] (LOC4347093), mRNA	GO:0030244|cellulose biosynthetic process;GO:0009833|plant-type primary cell wall biogenesis;GO:0009834|plant-type secondary cell wall biogenesis;GO:0010400|rhamnogalacturonan I side chain metabolic process;	GO:0009507|chloroplast;GO:0005794|Golgi apparatus;GO:0016021|integral component of membrane;GO:0005886|plasma membrane;	GO:0016760|cellulose synthase (UDP-forming) activity;GO:0016759|cellulose synthase activity;GO:0008270|zinc ion binding;
BGIOSGA018449	54	58	70	12	1	5	7.78147	8.90233e-07	up	PREDICTED: Oryza sativa Japonica Group glucan 1,3-beta-glucosidase (LOC4338201), mRNA	GO:0071555|cell wall organization;GO:0000272|polysaccharide catabolic process;	GO:0005576|extracellular region;	GO:0004338|glucan exo-1,3-beta-glucosidase activity;GO:0046872|metal ion binding;
BGIOSGA018441	45	84	159	0	0	0	383.191	2.94801e-11	up	Oryza sativa Indica Group cultivar RP Bio-226 chromosome 5 sequence	GO:0005975|carbohydrate metabolic process;GO:0006032|chitin catabolic process;GO:0006952|defense response;	GO:0005576|extracellular region;	GO:0008061|chitin binding;GO:0004568|chitinase activity;
BGIOSGA026169	34	41	58	5	1	1	14.3276	2.68192e-07	up	PREDICTED: Oryza sativa Japonica Group probable trehalose-phosphate phosphatase 3 (LOC4343959), mRNA	GO:0005992|trehalose biosynthetic process;GO:0070413|trehalose metabolism in response to stress;	GO:0005737|cytoplasm;	GO:0004805|trehalose-phosphatase activity;
BGIOSGA000478	2544	2227	6593	1033	878	970	2.87864	1.10435e-05	up	PREDICTED: Oryza sativa Japonica Group alpha-glucan phosphorylase, H isozyme (LOC4324810), mRNA	GO:0005975|carbohydrate metabolic process;	GO:0005737|cytoplasm;	GO:0008184|glycogen phosphorylase activity;GO:0030170|pyridoxal phosphate binding;
BGIOSGA009850	3171	2032	2710	881	516	444	3.26548	3.82326e-08	up	PREDICTED: Oryza sativa Japonica Group endoglucanase 10 (LOC4334029), mRNA	GO:0071555|cell wall organization;GO:0030245|cellulose catabolic process;	GO:0016021|integral component of membrane;	GO:0008810|cellulase activity;
BGIOSGA006344	60	44	150	26	15	22	2.97045	0.00163423	up	PREDICTED: Oryza sativa Japonica Group 1,4-alpha-glucan-branching enzyme 2, chloroplastic/amyloplastic (LOC4329532), mRNA	GO:0005978|glycogen biosynthetic process;GO:0019252|starch biosynthetic process;	GO:0009501|amyloplast;GO:0009507|chloroplast;	GO:0003844|1,4-alpha-glucan branching enzyme activity;GO:0043169|cation binding;GO:0004553|hydrolase activity, hydrolyzing O-glycosyl compounds;
BGIOSGA016812	139	39	86	5	10	23	5.35267	0.000109549	up	PREDICTED: Oryza sativa Japonica Group probable galacturonosyltransferase-like 3 (LOC4336486), mRNA	GO:0071555|cell wall organization;GO:0045489|pectin biosynthetic process;GO:0000271|polysaccharide biosynthetic process;	GO:0005794|Golgi apparatus;GO:0000139|Golgi membrane;GO:0016021|integral component of membrane;	GO:0047262|polygalacturonate 4-alpha-galacturonosyltransferase activity;GO:0016757|transferase activity, transferring glycosyl groups;
BGIOSGA037617	169	206	91	2	0	0	182.232	2.16064e-11	up	PREDICTED: Oryza sativa Japonica Group importin subunit beta-1 (LOC4352566), mRNA	GO:0006607|NLS-bearing protein import into nucleus;GO:0006606|protein import into nucleus;GO:0000059|protein import into nucleus, docking;GO:0000060|protein import into nucleus, translocation;GO:0006610|ribosomal protein import into nucleus;	GO:0009507|chloroplast;GO:0005737|cytoplasm;GO:0031965|nuclear membrane;GO:0034399|nuclear periphery;GO:0005634|nucleus;	GO:0008139|nuclear localization sequence binding;GO:0008565|protein transporter activity;
BGIOSGA018439	26	50	50	2	0	2	24.058	3.64346e-07	up	PREDICTED: Oryza sativa Japonica Group xylanase inhibitor protein 2-like (LOC4338208), mRNA	GO:0005975|carbohydrate metabolic process;GO:0006032|chitin catabolic process;GO:0006952|defense response;	GO:0005576|extracellular region;	GO:0008061|chitin binding;GO:0004568|chitinase activity;
BGIOSGA012215	57	29	121	2	11	5	8.14811	1.75833e-05	up	PREDICTED: Oryza sativa Japonica Group uncharacterized LOC4332224 (LOC4332224), transcript variant X2, mRNA	GO:0045493|xylan catabolic process;	GO:0016021|integral component of membrane;GO:0005886|plasma membrane;	GO:0031176|endo-1,4-beta-xylanase activity;
BGIOSGA015483	53	42	121	6	20	11	4.17025	0.000449686	up	PREDICTED: Oryza sativa Japonica Group sucrose synthase 7 (LOC4335303), mRNA	GO:0005985|sucrose metabolic process;	GO:0005737|cytoplasm;GO:0016020|membrane;	GO:0016157|sucrose synthase activity;
BGIOSGA004907	17	11	25	4	0	1	8.03589	0.0029288	up	PREDICTED: Oryza sativa Japonica Group beta-galactosidase 3 (LOC4324777), transcript variant X2, misc_RNA	GO:0005975|carbohydrate metabolic process;	GO:0048046|apoplast;GO:0005618|cell wall;GO:0005773|vacuole;	GO:0004565|beta-galactosidase activity;GO:0030246|carbohydrate binding;
BGIOSGA021801	113	46	55	12	11	14	4.45649	4.04948e-05	up	PREDICTED: Oryza sativa Japonica Group heparanase-like protein 3 (LOC4340299), mRNA	GO:0030198|extracellular matrix organization;GO:0030200|heparan sulfate proteoglycan catabolic process;	GO:0005576|extracellular region;GO:0005765|lysosomal membrane;GO:0009505|plant-type cell wall;	GO:0004566|beta-glucuronidase activity;GO:0043395|heparan sulfate proteoglycan binding;GO:0030305|heparanase activity;
BGIOSGA033103	93	137	128	4	7	4	17.9837	3.23911e-16	up	PREDICTED: Oryza sativa Japonica Group cellulose synthase A catalytic subunit 7 [UDP-forming] (LOC4348853), mRNA	GO:0071555|cell wall organization;GO:0030244|cellulose biosynthetic process;GO:0042742|defense response to bacterium;GO:0050832|defense response to fungus;GO:0009834|plant-type secondary cell wall biogenesis;	GO:0005618|cell wall;GO:0016021|integral component of membrane;GO:0005886|plasma membrane;	GO:0016760|cellulose synthase (UDP-forming) activity;GO:0016759|cellulose synthase activity;GO:0008270|zinc ion binding;
BGIOSGA016443	14	12	29	2	0	6	5.25719	0.0115497	up	PREDICTED: Oryza sativa Japonica Group alpha-(1,4)-fucosyltransferase (LOC9270041), mRNA	GO:0071555|cell wall organization;GO:0010493|Lewis a epitope biosynthetic process;GO:0006486|protein glycosylation;	GO:0032580|Golgi cisterna membrane;GO:0016021|integral component of membrane;	GO:0008417|fucosyltransferase activity;
BGIOSGA026704	28	16	25	2	1	10	4.14822	0.0124267	up	PREDICTED: Oryza sativa Japonica Group beta-glucosidase 27 (LOC4345995), mRNA	GO:0005975|carbohydrate metabolic process;GO:1901657|glycosyl compound metabolic process;	.	GO:0008422|beta-glucosidase activity;
BGIOSGA030408	83	69	73	11	4	3	9.5554	1.87615e-09	up	PREDICTED: Oryza sativa Japonica Group glucan endo-1,3-beta-glucosidase 5 (LOC4346582), mRNA	GO:0005975|carbohydrate metabolic process;GO:0006952|defense response;	GO:0031225|anchored component of membrane;GO:0046658|anchored component of plasma membrane;GO:0009505|plant-type cell wall;GO:0005886|plasma membrane;GO:0009506|plasmodesma;GO:0005773|vacuole;	GO:0042973|glucan endo-1,3-beta-D-glucosidase activity;GO:0004553|hydrolase activity, hydrolyzing O-glycosyl compounds;GO:0030247|polysaccharide binding;
BGIOSGA026707	137	80	136	11	18	7	7.24967	1.18986e-09	up	PREDICTED: Oryza sativa Japonica Group beta-glucosidase 27 (LOC4345995), mRNA	GO:0005975|carbohydrate metabolic process;GO:1901657|glycosyl compound metabolic process;	.	GO:0008422|beta-glucosidase activity;
BGIOSGA016684	66	50	98	17	6	20	3.78994	5.61992e-05	up	PREDICTED: Oryza sativa Japonica Group cytochrome b561 and DOMON domain-containing protein At3g07570 (LOC4336272), mRNA	GO:0055114|oxidation-reduction process;	GO:0016021|integral component of membrane;	GO:0046872|metal ion binding;
BGIOSGA004463	141	190	297	12	24	8	10.3408	4.47176e-13	up	PREDICTED: Oryza sativa Japonica Group cellulose synthase A catalytic subunit 4 [UDP-forming] (LOC4324625), mRNA	GO:0071555|cell wall organization;GO:0030244|cellulose biosynthetic process;GO:0042742|defense response to bacterium;GO:0050832|defense response to fungus;GO:0009834|plant-type secondary cell wall biogenesis;GO:0006970|response to osmotic stress;GO:0009414|response to water deprivation;	GO:0005618|cell wall;GO:0016021|integral component of membrane;GO:0005886|plasma membrane;	GO:0016760|cellulose synthase (UDP-forming) activity;GO:0046872|metal ion binding;
BGIOSGA029543	11	44	39	0	0	0	128.056	5.67974e-07	up	PREDICTED: Oryza sativa Japonica Group beta-glucosidase 30 (LOC4347441), transcript variant X1, mRNA	GO:0005975|carbohydrate metabolic process;GO:1901657|glycosyl compound metabolic process;	.	GO:0008422|beta-glucosidase activity;
BGIOSGA029421	16	3	10	0	1	0	20.419	0.00658634	up	PREDICTED: Oryza sativa Japonica Group putative alpha-L-fucosidase 1 (LOC4347611), mRNA	GO:0005975|carbohydrate metabolic process;	GO:0048046|apoplast;GO:0005773|vacuole;	GO:0004560|alpha-L-fucosidase activity;
BGIOSGA008174	14	31	91	0	0	1	91.1291	2.97664e-06	up	Oryza sativa Indica Group cultivar RP Bio-226 chromosome 2 sequence	GO:0032957|inositol trisphosphate metabolic process;	GO:0005622|intracellular;	GO:0005524|ATP binding;GO:0047325|inositol tetrakisphosphate 1-kinase activity;GO:0052726|inositol-1,3,4-trisphosphate 5-kinase activity;GO:0052725|inositol-1,3,4-trisphosphate 6-kinase activity;GO:0000287|magnesium ion binding;
BGIOSGA010803	486	477	651	198	154	203	2.19915	6.11481e-09	up	PREDICTED: Oryza sativa Japonica Group hydroxyacylglutathione hydrolase cytoplasmic (LOC4332736), mRNA	GO:0019243|methylglyoxal catabolic process to D-lactate via S-lactoyl-glutathione;	GO:0005829|cytosol;	GO:0004416|hydroxyacylglutathione hydrolase activity;GO:0046872|metal ion binding;
BGIOSGA016587	88	6	41	2	4	4	10.2203	0.000318672	up	PREDICTED: Oryza sativa Japonica Group glycerophosphodiester phosphodiesterase GDPDL3 (LOC4336129), mRNA	GO:0006071|glycerol metabolic process;GO:0010442|guard cell morphogenesis;GO:0006629|lipid metabolic process;GO:0052541|plant-type cell wall cellulose metabolic process;GO:0010026|trichome differentiation;	GO:0031225|anchored component of membrane;GO:0046658|anchored component of plasma membrane;GO:0005886|plasma membrane;GO:0009506|plasmodesma;	GO:0008889|glycerophosphodiester phosphodiesterase activity;
BGIOSGA013992	45	36	79	7	3	14	5.06043	5.87865e-05	up	Oryza sativa (indica cultivar-group) cDNA clone:OSIGCFA249L01, full insert sequence	.	.	.
BGIOSGA014723	4023	3262	6488	1320	730	1601	2.86302	2.63812e-07	up	PREDICTED: Oryza sativa Japonica Group beta-glucosidase 16 (LOC4336389), transcript variant X3, mRNA	GO:0005975|carbohydrate metabolic process;GO:1901657|glycosyl compound metabolic process;	.	GO:0008422|beta-glucosidase activity;
BGIOSGA029874	100	52	139	7	3	9	11.5421	1.43109e-10	up	PREDICTED: Oryza sativa Japonica Group enolase 1, chloroplastic (LOC4346906), mRNA	GO:0006096|glycolytic process;GO:0009735|response to cytokinin;GO:0010090|trichome morphogenesis;	GO:0009507|chloroplast;GO:0009570|chloroplast stroma;GO:0000015|phosphopyruvate hydratase complex;	GO:0000287|magnesium ion binding;GO:0004634|phosphopyruvate hydratase activity;
BGIOSGA026375	3263	2990	3721	862	1024	899	2.68045	4.39238e-12	up	PREDICTED: Oryza sativa Japonica Group UDP-glucuronic acid decarboxylase 2 (LOC4344260), mRNA	GO:0042732|D-xylose metabolic process;GO:0019305|dTDP-rhamnose biosynthetic process;GO:0033320|UDP-D-xylose biosynthetic process;	GO:0005768|endosome;GO:0005794|Golgi apparatus;GO:0032580|Golgi cisterna membrane;GO:0000139|Golgi membrane;GO:0016021|integral component of membrane;GO:0016020|membrane;GO:0005886|plasma membrane;GO:0005802|trans-Golgi network;	GO:0008460|dTDP-glucose 4,6-dehydratase activity;GO:0048040|UDP-glucuronate decarboxylase activity;
BGIOSGA019844	1173	909	1411	292	235	359	2.98931	1.4104e-13	up	Oryza sativa Japonica Group cDNA clone:006-205-G03, full insert sequence	GO:0006096|glycolytic process;	GO:0005737|cytoplasm;GO:0005829|cytosol;	GO:0004332|fructose-bisphosphate aldolase activity;
BGIOSGA018639	26	30	65	3	1	1	17.9266	1.18011e-06	up	PREDICTED: Oryza sativa Japonica Group probable beta-1,3-galactosyltransferase 12 (LOC4338054), mRNA	GO:0006486|protein glycosylation;	GO:0005794|Golgi apparatus;GO:0000139|Golgi membrane;GO:0016021|integral component of membrane;	GO:0008378|galactosyltransferase activity;
BGIOSGA032247	4185	4089	7437	1668	1377	1652	2.49275	7.64665e-09	up	PREDICTED: Oryza sativa Japonica Group enolase (LOC4348176), mRNA	GO:0006096|glycolytic process;	GO:0000015|phosphopyruvate hydratase complex;	GO:0000287|magnesium ion binding;GO:0004634|phosphopyruvate hydratase activity;
BGIOSGA010115	484	735	1837	190	224	491	2.4985	0.00388889	up	Oryza sativa Japonica Group DNA, chromosome 3, cultivar: Nipponbare, complete sequence	.	.	.
BGIOSGA035720	6	21	31	2	2	2	7.13871	0.00304691	up	PREDICTED: Oryza sativa Japonica Group xylanase inhibitor protein 2-like (LOC4351191), mRNA	GO:0005975|carbohydrate metabolic process;GO:0006032|chitin catabolic process;GO:0006952|defense response;	GO:0005576|extracellular region;	GO:0008061|chitin binding;GO:0004568|chitinase activity;
BGIOSGA024163	55	4	27	6	1	0	9.42811	0.00493433	up	PREDICTED: Oryza sativa Japonica Group glucan endo-1,3-beta-glucosidase 3 (LOC4343492), transcript variant X2, mRNA	GO:0005975|carbohydrate metabolic process;GO:0071555|cell wall organization;GO:0006952|defense response;	GO:0031225|anchored component of membrane;GO:0046658|anchored component of plasma membrane;GO:0005576|extracellular region;GO:0009505|plant-type cell wall;GO:0005886|plasma membrane;	GO:0042973|glucan endo-1,3-beta-D-glucosidase activity;GO:0004553|hydrolase activity, hydrolyzing O-glycosyl compounds;GO:0030247|polysaccharide binding;
BGIOSGA034997	48	62	79	17	18	26	2.33801	0.0021375	up	PREDICTED: Oryza sativa Japonica Group chaperonin 60 subunit beta 4, chloroplastic-like (LOC107275738), mRNA	GO:0006457|protein folding;GO:0042026|protein refolding;	GO:0009507|chloroplast;GO:0009941|chloroplast envelope;GO:0009570|chloroplast stroma;	GO:0005524|ATP binding;
BGIOSGA007498	68	68	138	16	15	18	4.15132	1.08586e-06	up	PREDICTED: Oryza sativa Japonica Group glucan endo-1,3-beta-glucosidase 6 (LOC4328252), mRNA	GO:0005975|carbohydrate metabolic process;GO:0006952|defense response;	GO:0031225|anchored component of membrane;GO:0046658|anchored component of plasma membrane;GO:0005886|plasma membrane;GO:0009506|plasmodesma;	GO:0042973|glucan endo-1,3-beta-D-glucosidase activity;GO:0004553|hydrolase activity, hydrolyzing O-glycosyl compounds;GO:0030247|polysaccharide binding;
BGIOSGA011746	27	18	64	0	4	0	19.1073	4.2752e-05	up	PREDICTED: Oryza sativa Japonica Group homeobox protein knotted-1-like 3 (LOC4331449), mRNA	GO:0045892|negative regulation of transcription, DNA-templated;GO:2000652|regulation of secondary cell wall biogenesis;GO:0010089|xylem development;	GO:0005634|nucleus;	GO:0003677|DNA binding;
BGIOSGA016512	8421	9276	12181	1319	1331	1201	5.79187	9.30259e-38	up	Oryza sativa clone RRlibD00699 mRNA sequence	.	GO:0000786|nucleosome;GO:0005634|nucleus;	GO:0003677|DNA binding;
BGIOSGA009465	136	103	198	0	0	0	590.374	8.06748e-14	up	PREDICTED: Oryza sativa Japonica Group poly(ADP-ribose) glycohydrolase 1 (LOC4334754), transcript variant X1, mRNA	GO:0005975|carbohydrate metabolic process;GO:0006974|cellular response to DNA damage stimulus;GO:0050832|defense response to fungus;GO:0006282|regulation of DNA repair;GO:0006970|response to osmotic stress;GO:0006979|response to oxidative stress;GO:0009414|response to water deprivation;GO:0048511|rhythmic process;GO:0090332|stomatal closure;	.	GO:0004649|poly(ADP-ribose) glycohydrolase activity;
BGIOSGA029395	2107	1887	3151	801	730	854	2.24087	7.11111e-09	up	Oryza sativa (indica cultivar-group) cDNA clone:OSIGCSN024J09, full insert sequence	GO:0005975|carbohydrate metabolic process;GO:0006098|pentose-phosphate shunt;	GO:0009507|chloroplast;	GO:0017057|6-phosphogluconolactonase activity;
BGIOSGA009462	1111	2019	2025	604	338	490	2.74579	4.9312e-07	up	PREDICTED: Oryza sativa Japonica Group uncharacterized LOC4334748 (LOC4334748), transcript variant X2, mRNA	GO:0009269|response to desiccation;	.	.
BGIOSGA014808	310	285	179	4	0	35	16.4514	0.00671874	up	Oryza sativa Japonica Group cDNA, clone: J065201H14, full insert sequence	GO:0006040|amino sugar metabolic process;GO:0016998|cell wall macromolecule catabolic process;GO:0006032|chitin catabolic process;GO:0006952|defense response;GO:0000272|polysaccharide catabolic process;	GO:0005622|intracellular;	GO:0008061|chitin binding;GO:0004568|chitinase activity;
BGIOSGA030373	17	3	10	1	0	0	21.1578	0.00597227	up	Oryza sativa Indica Group cultivar RP Bio-226 chromosome 9 sequence	GO:0005975|carbohydrate metabolic process;	GO:0048046|apoplast;GO:0005618|cell wall;	GO:0004575|sucrose alpha-glucosidase activity;
BGIOSGA014248	14	14	34	0	0	0	82.6127	6.5999e-06	up	Oryza sativa Indica Group cultivar RP Bio-226 chromosome 4 sequence	GO:0031222|arabinan catabolic process;GO:0009627|systemic acquired resistance;GO:0045493|xylan catabolic process;	GO:0048046|apoplast;GO:0005618|cell wall;GO:0009505|plant-type cell wall;GO:0005578|proteinaceous extracellular matrix;	GO:0046556|alpha-L-arabinofuranosidase activity;GO:0009044|xylan 1,4-beta-xylosidase activity;
BGIOSGA018719	56	93	306	35	34	40	3.00505	0.00305586	up	Oryza sativa Indica Group cultivar RP Bio-226 chromosome 5 sequence	GO:0010021|amylopectin biosynthetic process;GO:0019252|starch biosynthetic process;	GO:0009507|chloroplast;	GO:0019156|isoamylase activity;
BGIOSGA033530	14	15	68	2	3	3	8.67368	0.000419118	up	PREDICTED: Oryza sativa Japonica Group xylanase inhibitor protein 1-like (LOC4351185), mRNA	GO:0005975|carbohydrate metabolic process;GO:0006032|chitin catabolic process;GO:0006952|defense response;	GO:0005576|extracellular region;	GO:0008061|chitin binding;GO:0004568|chitinase activity;
BGIOSGA035159	122	126	381	25	21	24	6.54702	3.13698e-09	up	PREDICTED: Oryza sativa Japonica Group probable beta-D-xylosidase 7 (LOC4350320), mRNA	GO:0031222|arabinan catabolic process;GO:0045493|xylan catabolic process;	GO:0048046|apoplast;GO:0005618|cell wall;GO:0009507|chloroplast;GO:0009505|plant-type cell wall;GO:0009506|plasmodesma;GO:0005578|proteinaceous extracellular matrix;	GO:0046556|alpha-L-arabinofuranosidase activity;GO:0009044|xylan 1,4-beta-xylosidase activity;
BGIOSGA017387	21	16	38	1	5	2	6.79857	0.000801684	up	Oryza sativa Indica Group cultivar RP Bio-226 chromosome 4 sequence	.	GO:0005576|extracellular region;	GO:0004190|aspartic-type endopeptidase activity;
BGIOSGA004982	2635	3001	3874	1210	990	1233	2.09038	7.2041e-10	up	PREDICTED: Oryza sativa Japonica Group beta-glucosidase 4 (LOC4325106), transcript variant X2, mRNA	GO:0030245|cellulose catabolic process;GO:1901657|glycosyl compound metabolic process;	GO:0005829|cytosol;	GO:0008422|beta-glucosidase activity;
BGIOSGA033189	1805	1500	4173	495	538	658	3.23912	4.08865e-07	up	PREDICTED: Oryza sativa Japonica Group alpha-galactosidase (LOC4348988), transcript variant X2, mRNA	GO:0005975|carbohydrate metabolic process;	GO:0009505|plant-type cell wall;	GO:0052692|raffinose alpha-galactosidase activity;
BGIOSGA029378	14	4	29	0	2	0	16.4736	0.00433175	up	Oryza sativa Indica Group cultivar RP Bio-226 chromosome 9 sequence	GO:0005975|carbohydrate metabolic process;GO:0006952|defense response;	GO:0005615|extracellular space;	GO:0042973|glucan endo-1,3-beta-D-glucosidase activity;
BGIOSGA033188	1446	1503	2614	590	390	852	2.30301	3.37377e-05	up	PREDICTED: Oryza sativa Japonica Group alpha-galactosidase (LOC4348984), mRNA	GO:0005975|carbohydrate metabolic process;GO:0071555|cell wall organization;	GO:0048046|apoplast;GO:0005618|cell wall;GO:0009505|plant-type cell wall;	GO:0052692|raffinose alpha-galactosidase activity;
BGIOSGA015753	41	8	1	0	1	2	13.3407	0.0108284	up	Oryza sativa Indica Group cultivar RP Bio-226 chromosome 4 sequence	GO:0019438|aromatic compound biosynthetic process;	GO:0005829|cytosol;	GO:0008171|O-methyltransferase activity;GO:0008757|S-adenosylmethionine-dependent methyltransferase activity;
BGIOSGA015875	276	165	556	61	59	74	3.77335	9.84338e-07	up	PREDICTED: Oryza sativa Japonica Group pullulanase 1, chloroplastic (LOC4335042), mRNA	GO:0019252|starch biosynthetic process;GO:0005983|starch catabolic process;	GO:0009507|chloroplast;GO:0009570|chloroplast stroma;	GO:0010303|limit dextrinase activity;GO:0051060|pullulanase activity;
BGIOSGA025337	39	48	67	16	12	7	3.27924	0.000522366	up	PREDICTED: Oryza sativa Japonica Group hexokinase-4, chloroplastic (LOC4342654), mRNA	GO:0001678|cellular glucose homeostasis;GO:0006096|glycolytic process;	GO:0009570|chloroplast stroma;GO:0005829|cytosol;	GO:0005524|ATP binding;GO:0008865|fructokinase activity;GO:0004340|glucokinase activity;GO:0005536|glucose binding;GO:0019158|mannokinase activity;
BGIOSGA027518	9231	14056	23546	2407	1647	2882	5.06662	1.83976e-14	up	PREDICTED: Oryza sativa Japonica Group lactoylglutathione lyase (LOC4344858), mRNA	.	.	GO:0004462|lactoylglutathione lyase activity;GO:0046872|metal ion binding;
BGIOSGA000932	935	1028	1187	365	371	453	2.00377	4.10453e-08	up	Oryza sativa Indica Group cultivar RP Bio-226 chromosome 1 sequence	GO:0016042|lipid catabolic process;	GO:0005737|cytoplasm;	GO:0008970|phosphatidylcholine 1-acylhydrolase activity;
BGIOSGA023034	19	18	63	1	1	4	12.2835	6.60193e-05	up	PREDICTED: Oryza sativa Japonica Group glucan endo-1,3-beta-glucosidase 11 (LOC4341204), mRNA	GO:0005975|carbohydrate metabolic process;GO:0007154|cell communication;GO:0071555|cell wall organization;GO:0006952|defense response;	GO:0031225|anchored component of membrane;GO:0046658|anchored component of plasma membrane;GO:0005576|extracellular region;GO:0009505|plant-type cell wall;GO:0005886|plasma membrane;	GO:0042973|glucan endo-1,3-beta-D-glucosidase activity;GO:0030247|polysaccharide binding;
BGIOSGA029811	18	17	26	2	1	8	4.2734	0.00986037	up	Oryza sativa Japonica Group DNA, chromosome 9, cultivar: Nipponbare, complete sequence	GO:0071555|cell wall organization;GO:0030245|cellulose catabolic process;	GO:0005576|extracellular region;	GO:0008810|cellulase activity;
BGIOSGA000133	104	121	106	2	0	19	12.8245	0.00563619	up	Oryza sativa endo-1,3-beta-glucanase mRNA, complete cds	GO:0006076|(1->3)-beta-D-glucan catabolic process;GO:0050832|defense response to fungus;	.	GO:0042973|glucan endo-1,3-beta-D-glucosidase activity;
BGIOSGA026666	79	96	309	4	2	3	39.1454	4.67473e-14	up	PREDICTED: Oryza sativa Japonica Group xylanase inhibitor protein 2-like (LOC4346051), mRNA	GO:0005975|carbohydrate metabolic process;GO:0006032|chitin catabolic process;GO:0006952|defense response;	GO:0005576|extracellular region;	GO:0008061|chitin binding;GO:0004568|chitinase activity;
BGIOSGA026304	282	300	373	1	2	3	120.31	3.61786e-27	up	PREDICTED: Oryza sativa Japonica Group beta-glucosidase 26 (LOC4344146), transcript variant X3, mRNA	GO:0005975|carbohydrate metabolic process;GO:1901657|glycosyl compound metabolic process;	.	GO:0033907|beta-D-fucosidase activity;GO:0004565|beta-galactosidase activity;GO:0008422|beta-glucosidase activity;GO:0047701|beta-L-arabinosidase activity;GO:0004567|beta-mannosidase activity;GO:0080079|cellobiose glucosidase activity;GO:0004338|glucan exo-1,3-beta-glucosidase activity;
BGIOSGA029814	24	35	33	6	8	3	4.04154	0.00137973	up	PREDICTED: Oryza sativa Japonica Group endoglucanase 22 (LOC4346968), mRNA	GO:0071555|cell wall organization;GO:0030245|cellulose catabolic process;	GO:0005576|extracellular region;	GO:0008810|cellulase activity;
BGIOSGA005154	15	50	22	2	0	7	7.74981	0.00157809	up	Oryza sativa (indica cultivar-group) cDNA clone:OSIGCRA130O23, full insert sequence	GO:0006076|(1->3)-beta-D-glucan catabolic process;GO:0050832|defense response to fungus;	.	GO:0042973|glucan endo-1,3-beta-D-glucosidase activity;
BGIOSGA004064	25	35	33	4	6	4	4.99952	0.000225217	up	PREDICTED: Oryza sativa Japonica Group polygalacturonase At1g48100 (LOC4326573), transcript variant X1, mRNA	GO:0005975|carbohydrate metabolic process;GO:0071555|cell wall organization;	GO:0005618|cell wall;GO:0005576|extracellular region;	GO:0004650|polygalacturonase activity;
BGIOSGA011144	9	7	26	0	0	0	55.3221	0.000161423	up	PREDICTED: Oryza sativa Japonica Group probable xyloglucan endotransglucosylase/hydrolase protein 27 (LOC4332198), mRNA	GO:0042546|cell wall biogenesis;GO:0071555|cell wall organization;GO:0010087|phloem or xylem histogenesis;GO:0010411|xyloglucan metabolic process;	GO:0048046|apoplast;GO:0005618|cell wall;	GO:0004553|hydrolase activity, hydrolyzing O-glycosyl compounds;GO:0016762|xyloglucan:xyloglucosyl transferase activity;
BGIOSGA003318	131	63	64	26	8	37	2.8873	0.00518707	up	PREDICTED: Oryza sativa Japonica Group polygalacturonase At1g48100 (LOC4326721), mRNA	GO:0005975|carbohydrate metabolic process;GO:0071555|cell wall organization;	GO:0005618|cell wall;GO:0005576|extracellular region;	GO:0004650|polygalacturonase activity;
BGIOSGA019450	13	12	51	0	2	0	26.6497	0.000304851	up	PREDICTED: Oryza sativa Japonica Group rop guanine nucleotide exchange factor 1 (LOC4347751), mRNA	GO:0009860|pollen tube growth;GO:0080092|regulation of pollen tube growth;	GO:0016324|apical plasma membrane;GO:0005829|cytosol;	GO:0005089|Rho guanyl-nucleotide exchange factor activity;
BGIOSGA000837	68	58	34	7	2	5	8.9666	7.84462e-07	up	Oryza sativa (indica cultivar-group) cDNA clone:OSIGCSA025K11, full insert sequence	GO:0046355|mannan catabolic process;	GO:0005576|extracellular region;	GO:0016985|mannan endo-1,4-beta-mannosidase activity;
BGIOSGA029486	135	51	166	10	3	23	7.52082	1.81108e-06	up	Oryza sativa Indica Group cultivar RP Bio-226 chromosome 9 sequence	GO:0005975|carbohydrate metabolic process;GO:0050832|defense response to fungus;GO:0050829|defense response to Gram-negative bacterium;GO:0033481|galacturonate biosynthetic process;	GO:0005768|endosome;GO:0005794|Golgi apparatus;GO:0032580|Golgi cisterna membrane;GO:0016021|integral component of membrane;GO:0005802|trans-Golgi network;	GO:0050378|UDP-glucuronate 4-epimerase activity;
BGIOSGA001492	59	67	123	6	16	6	6.42642	8.58065e-07	up	PREDICTED: Oryza sativa Japonica Group callose synthase 7 (LOC4327807), transcript variant X4, mRNA	GO:0006075|(1->3)-beta-D-glucan biosynthetic process;GO:0071555|cell wall organization;GO:0008360|regulation of cell shape;	GO:0000148|1,3-beta-D-glucan synthase complex;GO:0016021|integral component of membrane;	GO:0003843|1,3-beta-D-glucan synthase activity;
BGIOSGA011042	2371	1539	1738	350	430	401	3.62062	5.38049e-12	up	PREDICTED: Oryza sativa Japonica Group fructose-1,6-bisphosphatase, chloroplastic (LOC4332364), mRNA	GO:0030388|fructose 1,6-bisphosphate metabolic process;GO:0006002|fructose 6-phosphate metabolic process;GO:0006001|fructose catabolic process;GO:0006000|fructose metabolic process;GO:0006094|gluconeogenesis;GO:0009773|photosynthetic electron transport in photosystem I;GO:0019253|reductive pentose-phosphate cycle;GO:0009735|response to cytokinin;GO:0005986|sucrose biosynthetic process;	GO:0048046|apoplast;GO:0009570|chloroplast stroma;GO:0005737|cytoplasm;GO:0010319|stromule;	GO:0042132|fructose 1,6-bisphosphate 1-phosphatase activity;GO:0046872|metal ion binding;
BGIOSGA012138	10	13	29	0	0	0	69.2094	2.61227e-05	up	PREDICTED: Oryza sativa Japonica Group glucan endo-1,3-beta-glucosidase 3 (LOC4332097), transcript variant X1, mRNA	GO:0005975|carbohydrate metabolic process;GO:0006952|defense response;	GO:0031225|anchored component of membrane;GO:0046658|anchored component of plasma membrane;GO:0005886|plasma membrane;	GO:0042973|glucan endo-1,3-beta-D-glucosidase activity;GO:0004553|hydrolase activity, hydrolyzing O-glycosyl compounds;GO:0030247|polysaccharide binding;
BGIOSGA021860	2896	2311	2386	1252	1475	1208	1.45519	0.0265681	up	Oryza sativa (indica cultivar-group) soluble starch synthase I precursor, mRNA, complete cds	GO:0019252|starch biosynthetic process;	GO:0009501|amyloplast;GO:0009507|chloroplast;	GO:0033201|alpha-1,4-glucan synthase activity;GO:0004373|glycogen (starch) synthase activity;GO:0009011|starch synthase activity;	.	.
BGIOSGA004392	1192	1144	1673	864	861	889	1.14717	0.292124	up	Oryza sativa Indica Group trehalose-6-phosphate synthase 3 (TPS3) mRNA, complete cds	GO:0005992|trehalose biosynthetic process;GO:0070413|trehalose metabolism in response to stress;	GO:0005829|cytosol;	GO:0016791|phosphatase activity;GO:0016757|transferase activity, transferring glycosyl groups;	K16055	TPS; trehalose 6-phosphate synthase/phosphatase [EC:2.4.1.15 3.1.3.12]
BGIOSGA033135	42	42	78	28	38	34	1.19631	0.521198	up	PREDICTED: Oryza sativa Japonica Group malate dehydrogenase, cytoplasmic (LOC4348905), mRNA	GO:0005975|carbohydrate metabolic process;GO:0006108|malate metabolic process;GO:0006734|NADH metabolic process;GO:0006107|oxaloacetate metabolic process;GO:0006099|tricarboxylic acid cycle;	GO:0005737|cytoplasm;	GO:0030060|L-malate dehydrogenase activity;	K00025	MDH1; malate dehydrogenase [EC:1.1.1.37]
BGIOSGA025595	15518	4945	10918	4801	7233	8623	1.14644	0.619689	up	PREDICTED: Oryza sativa Japonica Group photosystem I reaction center subunit IV, chloroplastic (LOC4343070), mRNA	GO:0015979|photosynthesis;	GO:0009535|chloroplast thylakoid membrane;GO:0009538|photosystem I reaction center;	.	.	.
