# Supplementary material for: Integration of Transcriptomic And Proteomic Analyses Reveals Several Levels of Metabolic Regulation In The Excess Starch And Early Senescent Leaf Mutant lses1 In Rice
Source: Research Square preprint supplement (doi:10.21203/rs.3.rs-805903/v1), 2021-09-14
Supplement: Supplementary file 5 [file d0a5b38e28e350e2f7d8ce30.xlsx]

## Sheet: Sheet1
#Sample	C1(WT repeat 1)	C2(WT repeat 2)	C3(WT repeat 3)	D1(lses1 repeat 1)	D2(lses1 repeat 2)	D3(lses1 repeat 3)
Raw Reads Number	45278428	44178726	47912682	51173252	40990552	48151060
Raw Bases Number	6791764200	6626808900	7186902300	7675987800	6148582800	7222659000
Clean Reads Number	42351516	40467408	44092234	47505322	38807902	45189196
Clean Reads Rate(%)	93.54	91.6	92.03	92.83	94.67	93.85
Clean Bases Number	6352727400	6070111200	6613835100	7125798300	5821185300	6778379400
Low-quality Reads Number	207536	221446	288302	271366	226450	287122
Low-quality Reads Rate(%)	0.46	0.5	0.6	0.53	0.55	0.6
Ns Reads Number	60	0	0	0	0	0
Ns Reads Rate(%)	0	0	0	0	0	0
Adapter Polluted Reads Number	2386934	3003802	2716272	2774282	1456262	1904218
Adapter Polluted Reads Rate(%)	5.27	6.8	5.67	5.42	3.55	3.96
PolyG Reads Number	332382	486070	815874	622282	499938	770524
PolyG Reads Rate(%)	0.73	1.1	1.7	1.22	1.22	1.6
Raw Q30 Bases Rate(%)	91.8	91.52	91.35	91.41	91.36	91.01
Clean Q30 Bases Rate(%)	92	91.78	91.72	91.69	91.64	91.36
