# Supplementary material for: Integration of Transcriptomic And Proteomic Analyses Reveals Several Levels of Metabolic Regulation In The Excess Starch And Early Senescent Leaf Mutant lses1 In Rice
Source: Research Square preprint supplement (doi:10.21203/rs.3.rs-805903/v1), 2021-09-14
Supplement: Supplementary file 6 [file e0826cbc1eb08299e209d7b7.xlsx]

## Sheet: Sheet1
content of MDA
Variety	Repeat1	Repeat2	Repeat3	average	Standard deviation	p-value
WT	1.4859	1.6512	1.6512	1.5961	0.095436	0.01
MT	1.9692	2.1307	2.2708	2.12357	0.150926
content of H2O2
Variety	Repeat1	Repeat2	Repeat3	average	Standard deviation	p-value
WT	0.08927	0.0903	0.0978	0.0924567	0.00465603	0.0001446
MT	0.1411	0.1457	0.1485	0.1451	0.00373631
content of -OH
Variety	Repeat1	Repeat2	Repeat3	average	Standard deviation	p-value
WT	190.398	185.277	182.903	186.193	3.83048	0.003507
MT	201.098	205.184	208.001	204.761	3.47089
content of O2-
Variety	Repeat1	Repeat2	Repeat3	average	Standard deviation	p-value
WT	199.176	196.158	192.122	195.819	3.53892	0.01243
MT	217.896	212.344	225.409	218.549	6.55687
Activity of SOD
Variety	Repeat1	Repeat2	Repeat3	average	Standard deviation	p-value
WT	62.4235	63.3656	71.644	65.811	5.07341	0.03736
MT	50.8435	54.825	57.0726	54.247	3.15451
Activity of CAT
Variety	Repeat1	Repeat2	Repeat3	average	Standard deviation	p-value
WT	35.4006	34.886	34.4744	34.9203	0.464054	0.01755
MT	31.2051	29.299	28.2921	29.5987	1.47945
Activity of POD
Variety	Repeat1	Repeat2	Repeat3	average	Standard deviation	p-value
WT	124.233	110.17	116.067	116.823	7.06195	0.02199
MT	100.047	98.3268	92.5935	96.989	3.90258
Content of starch(ED)
Variety	Repeat1	Repeat2	Repeat3	average	Standard deviation	p-value
WT	8.9996	9.5775	9.1613	9.24613	0.298144	2.441e-05
MT	17.6507	17.7374	17.9541	17.7807	0.156273
Content of starch(EN)
Variety	Repeat1	Repeat2	Repeat3	average	Standard deviation	p-value
WT	6.4678	5.4274	5.728	5.8744	0.535428	0.003325
MT	16.0756	13.6047	16.0034	15.2279	1.4062
Content of Chla
Variety	Repeat1	Repeat2	Repeat3	average	Standard deviation	p-value
WT	2.0777	2.0751	2.1152	2.08933	0.0224389	8.244e-05
MT	1.149	1.159	1.1587	1.15557	0.00568888
Content of Chlb
Variety	Repeat1	Repeat2	Repeat3	average	Standard deviation	p-value
WT	0.6818	0.6752	0.6701	0.6757	0.005866	8.901e-06
MT	0.3764	0.3741	0.3794	0.376633	0.00265769
Content of Total Chl
Variety	Repeat1	Repeat2	Repeat3	average	Standard deviation	p-value
WT	2.7595	2.7503	2.7853	2.76503	0.0148147	1.154e-05
MT	1.5254	1.5331	1.5381	1.5322	0.00522366
