# Supplementary material for: Integration of Transcriptomic And Proteomic Analyses Reveals Several Levels of Metabolic Regulation In The Excess Starch And Early Senescent Leaf Mutant lses1 In Rice
Source: Research Square preprint supplement (doi:10.21203/rs.3.rs-805903/v1), 2021-09-14
Supplement: Supplementary file 7 [file ee8f624814ec73e7e8fd24eb.xlsx]

## Sheet: Genes
Gene	D1(lses1)_count	D2(lses1)_count	D3(lses1)_count	C1(WT)_count	C2(WT)_count	C3(WT)_count	FoldChange	pval	Up/Down	Description	GO:biological_process	GO:cellular_component	GO:molecular_function
BGIOSGA017188	6	5	9	78	50	75	0.0748335	6.04605e-15	down	PREDICTED: Oryza sativa Japonica Group peroxidase 1-like (LOC9267450), transcript variant X5, mRNA	GO:0042744|hydrogen peroxide catabolic process;GO:0009664|plant-type cell wall organization;GO:0006979|response to oxidative stress;	GO:0005576|extracellular region;GO:0009505|plant-type cell wall;	GO:0020037|heme binding;GO:0046872|metal ion binding;GO:0004601|peroxidase activity;
BGIOSGA026392	36	25	12	99	202	50	0.154385	1.05852e-05	down	Oryza sativa peroxidase POC1 mRNA, complete cds	GO:0042744|hydrogen peroxide catabolic process;GO:0006979|response to oxidative stress;	GO:0005576|extracellular region;	GO:0020037|heme binding;GO:0046872|metal ion binding;GO:0004601|peroxidase activity;
BGIOSGA012569	1533	1370	1181	2869	2404	2151	0.41967	3.38111e-07	down	PREDICTED: Oryza sativa Japonica Group phospholipid-transporting ATPase 1 (LOC4332752), transcript variant X4, mRNA	.	GO:0005789|endoplasmic reticulum membrane;GO:0016021|integral component of membrane;GO:0016020|membrane;GO:0005886|plasma membrane;	GO:0005524|ATP binding;GO:0000287|magnesium ion binding;GO:0004012|phospholipid-translocating ATPase activity;
BGIOSGA026391	959	619	846	202	304	293	2.27818	3.40455e-05	up	Oryza sativa peroxidase (POX5.1) mRNA, complete cds	GO:0042744|hydrogen peroxide catabolic process;GO:0006979|response to oxidative stress;	GO:0005576|extracellular region;	GO:0020037|heme binding;GO:0046872|metal ion binding;GO:0004601|peroxidase activity;
BGIOSGA012374	266	249	423	83	73	127	2.50013	3.21744e-06	up	PREDICTED: Oryza sativa Japonica Group L-ascorbate peroxidase 1, cytosolic (LOC4332474), mRNA	GO:0034599|cellular response to oxidative stress;GO:0042744|hydrogen peroxide catabolic process;GO:0000302|response to reactive oxygen species;	GO:0009507|chloroplast;	GO:0004130|cytochrome-c peroxidase activity;GO:0020037|heme binding;GO:0016688|L-ascorbate peroxidase activity;GO:0046872|metal ion binding;
BGIOSGA015065	432	274	829	146	101	203	2.54788	0.00028873	up	PREDICTED: Oryza sativa Japonica Group probable L-ascorbate peroxidase 7, chloroplastic (LOC4335896), transcript variant X4, mRNA	GO:0034599|cellular response to oxidative stress;GO:0042744|hydrogen peroxide catabolic process;GO:0000302|response to reactive oxygen species;	GO:0009507|chloroplast;GO:0009570|chloroplast stroma;	GO:0004130|cytochrome-c peroxidase activity;GO:0020037|heme binding;GO:0016688|L-ascorbate peroxidase activity;GO:0046872|metal ion binding;
BGIOSGA011560	403	318	673	107	93	134	3.11747	1.04073e-08	up	PREDICTED: Oryza sativa Japonica Group peroxidase 5 (LOC4331437), mRNA	GO:0042744|hydrogen peroxide catabolic process;GO:0006979|response to oxidative stress;	GO:0005576|extracellular region;	GO:0020037|heme binding;GO:0046872|metal ion binding;GO:0004601|peroxidase activity;
BGIOSGA005233	29	23	62	3	9	10	3.79254	0.00285267	up	PREDICTED: Oryza sativa Japonica Group cationic peroxidase SPC4 (LOC4324557), transcript variant X2, mRNA	GO:0042744|hydrogen peroxide catabolic process;GO:0009664|plant-type cell wall organization;GO:0006979|response to oxidative stress;	GO:0005576|extracellular region;GO:0009505|plant-type cell wall;	GO:0020037|heme binding;GO:0046872|metal ion binding;GO:0004601|peroxidase activity;
BGIOSGA005230	277	186	576	78	46	64	4.08836	1.66345e-07	up	PREDICTED: Oryza sativa Japonica Group cationic peroxidase SPC4 (LOC4324554), mRNA	GO:0042744|hydrogen peroxide catabolic process;GO:0009664|plant-type cell wall organization;GO:0006979|response to oxidative stress;	GO:0005576|extracellular region;GO:0009505|plant-type cell wall;	GO:0020037|heme binding;GO:0046872|metal ion binding;GO:0004601|peroxidase activity;
BGIOSGA003395	34	27	158	14	6	15	4.55395	0.00145177	up	PREDICTED: Oryza sativa Japonica Group peroxidase 1 (LOC4327001), mRNA	GO:0042744|hydrogen peroxide catabolic process;GO:0006979|response to oxidative stress;	GO:0005576|extracellular region;GO:0005773|vacuole;	GO:0020037|heme binding;GO:0046872|metal ion binding;GO:0004601|peroxidase activity;
BGIOSGA015546	38	40	91	9	4	11	5.27306	2.19385e-05	up	Oryza sativa (indica cultivar-group) putative peroxisome-bound ascorbate peroxidase (APx3) mRNA, complete cds	GO:0042744|hydrogen peroxide catabolic process;GO:0006979|response to oxidative stress;	GO:0016021|integral component of membrane;	GO:0020037|heme binding;GO:0016688|L-ascorbate peroxidase activity;GO:0046872|metal ion binding;
BGIOSGA023530	901	152	208	33	65	58	6.20882	2.1335e-05	up	PREDICTED: Oryza sativa Japonica Group peroxidase 16 (LOC4341935), mRNA	GO:0042744|hydrogen peroxide catabolic process;GO:0006979|response to oxidative stress;	GO:0005576|extracellular region;	GO:0020037|heme binding;GO:0046872|metal ion binding;GO:0004601|peroxidase activity;
BGIOSGA025043	69	8	15	3	6	2	6.33496	0.00573142	up	PREDICTED: Oryza sativa Japonica Group peroxidase 50 (LOC4342251), mRNA	GO:0042744|hydrogen peroxide catabolic process;GO:0006979|response to oxidative stress;GO:0009651|response to salt stress;	GO:0005576|extracellular region;	GO:0020037|heme binding;GO:0046872|metal ion binding;GO:0004601|peroxidase activity;
BGIOSGA014040	11	18	62	7	3	0	6.50334	0.00548987	up	PREDICTED: Oryza sativa Japonica Group cationic peroxidase SPC4 (LOC4337484), mRNA	GO:0042744|hydrogen peroxide catabolic process;GO:0009664|plant-type cell wall organization;GO:0006979|response to oxidative stress;	GO:0005618|cell wall;GO:0005576|extracellular region;GO:0016020|membrane;GO:0009505|plant-type cell wall;GO:0009506|plasmodesma;GO:0005773|vacuole;	GO:0020037|heme binding;GO:0046872|metal ion binding;GO:0004601|peroxidase activity;
BGIOSGA023477	65	26	23	5	2	4	8.1178	6.57242e-05	up	PREDICTED: Oryza sativa Japonica Group peroxidase 3 (LOC4341861), mRNA	GO:0042744|hydrogen peroxide catabolic process;GO:0042538|hyperosmotic salinity response;GO:0009664|plant-type cell wall organization;GO:0009409|response to cold;GO:0009269|response to desiccation;GO:0006979|response to oxidative stress;	GO:0005783|endoplasmic reticulum;GO:0005576|extracellular region;GO:0009505|plant-type cell wall;	GO:0020037|heme binding;GO:0046872|metal ion binding;GO:0004601|peroxidase activity;
BGIOSGA005232	58	32	192	4	6	12	9.29219	3.2885e-06	up	PREDICTED: Oryza sativa Japonica Group cationic peroxidase SPC4 (LOC4324556), mRNA	GO:0042744|hydrogen peroxide catabolic process;GO:0009664|plant-type cell wall organization;GO:0006979|response to oxidative stress;	GO:0005576|extracellular region;GO:0009505|plant-type cell wall;	GO:0020037|heme binding;GO:0046872|metal ion binding;GO:0004601|peroxidase activity;
BGIOSGA019131	357	98	135	15	3	10	16.6365	5.82765e-11	up	PREDICTED: Oryza sativa Japonica Group peroxidase 2 (LOC4337725), mRNA	GO:0032922|circadian regulation of gene expression;GO:0097167|circadian regulation of translation;GO:0042744|hydrogen peroxide catabolic process;GO:0042752|regulation of circadian rhythm;GO:0006979|response to oxidative stress;	GO:0005576|extracellular region;	GO:0020037|heme binding;GO:0046872|metal ion binding;GO:0004601|peroxidase activity;
BGIOSGA019138	8	6	6	0	0	0	27.6554	0.0047367	up	PREDICTED: Oryza sativa Japonica Group peroxidase 5 (LOC4337732), mRNA	GO:0042744|hydrogen peroxide catabolic process;GO:0006979|response to oxidative stress;	GO:0005576|extracellular region;	GO:0020037|heme binding;GO:0046872|metal ion binding;GO:0004601|peroxidase activity;
BGIOSGA007853	31	1	1	0	0	0	47.4359	0.00547771	up	PREDICTED: Oryza sativa Japonica Group peroxidase P7 (LOC4328832), mRNA	GO:0042744|hydrogen peroxide catabolic process;GO:0009809|lignin biosynthetic process;GO:1901430|positive regulation of syringal lignin biosynthetic process;GO:0006979|response to oxidative stress;GO:0010089|xylem development;	GO:0048046|apoplast;GO:0005618|cell wall;GO:0005829|cytosol;GO:0005794|Golgi apparatus;	GO:0020037|heme binding;GO:0046872|metal ion binding;GO:0004601|peroxidase activity;
BGIOSGA021076	27	2	5	0	0	0	48.0121	0.00163203	up	PREDICTED: Oryza sativa Japonica Group peroxidase P7 (LOC4341249), mRNA	GO:0042744|hydrogen peroxide catabolic process;GO:0006979|response to oxidative stress;	.	GO:0020037|heme binding;GO:0046872|metal ion binding;GO:0004601|peroxidase activity;
BGIOSGA003233	145	51	412	0	1	3	109.98	1.87862e-12	up	PREDICTED: Oryza sativa Japonica Group peroxidase 24 (LOC4326273), mRNA	GO:0042744|hydrogen peroxide catabolic process;GO:0009664|plant-type cell wall organization;GO:0006979|response to oxidative stress;	GO:0005576|extracellular region;GO:0009505|plant-type cell wall;	GO:0020037|heme binding;GO:0046872|metal ion binding;GO:0004601|peroxidase activity;
BGIOSGA011874	2	10	187	0	0	1	126.613	0.00231839	up	PREDICTED: Oryza sativa Japonica Group peroxidase 44 (LOC4331649), mRNA	GO:0042744|hydrogen peroxide catabolic process;GO:0009664|plant-type cell wall organization;GO:0006979|response to oxidative stress;	GO:0005576|extracellular region;GO:0009505|plant-type cell wall;	GO:0020037|heme binding;GO:0046872|metal ion binding;GO:0004601|peroxidase activity;
BGIOSGA011160	172	183	1046	0	0	2	510.954	3.60318e-09	up	PREDICTED: Oryza sativa Japonica Group peroxidase A2 (LOC4332175), mRNA	GO:0042744|hydrogen peroxide catabolic process;GO:0006979|response to oxidative stress;	GO:0005576|extracellular region;	GO:0020037|heme binding;GO:0046872|metal ion binding;GO:0004601|peroxidase activity;
BGIOSGA029383	763	1027	572	1625	1317	2295	0.352964	1.26358e-06	down	RecName: Full=Protein STAY-GREEN, chloroplastic; AltName: Full=Protein STAYGREEN; Flags: Precursor	.	GO:0009507|chloroplast;	.
BGIOSGA031378	18834	12483	9019	23533	22811	17107	0.486852	0.00241429	down	PREDICTED: chlorophyllide a oxygenase, chloroplastic [Oryza sativa Japonica Group]	GO:0015995|chlorophyll biosynthetic process;	GO:0031969|chloroplast membrane;GO:0009535|chloroplast thylakoid membrane;	GO:0051537|2 iron, 2 sulfur cluster binding;GO:0010277|chlorophyllide a oxygenase [overall] activity;GO:0005506|iron ion binding;GO:0016705|oxidoreductase activity, acting on paired donors, with incorporation or reduction of molecular oxygen;
BGIOSGA002871	22	6	6	45	30	17	0.283836	0.00906624	down	ABC_transporter, partial [Triticum aestivum]	.	GO:0048046|apoplast;GO:0016021|integral component of membrane;GO:0000325|plant-type vacuole;GO:0009506|plasmodesma;GO:0005774|vacuolar membrane;GO:0005773|vacuole;	GO:0005524|ATP binding;GO:0042626|ATPase activity, coupled to transmembrane movement of substances;GO:0010290|chlorophyll catabolite transmembrane transporter activity;GO:0015431|glutathione S-conjugate-exporting ATPase activity;GO:0008559|xenobiotic-transporting ATPase activity;
BGIOSGA032011	375	355	802	48	43	151	4.80487	8.53658e-07	up	Putative red chlorophyll catabolite reductase [Oryza sativa Japonica Group]	GO:0015996|chlorophyll catabolic process;	GO:0009570|chloroplast stroma;	GO:0016491|oxidoreductase activity;
BGIOSGA034870	599	606	899	192	169	241	2.63468	8.29672e-11	up	hypothetical protein OsI_35238 [Oryza sativa Indica Group]	GO:0006122|mitochondrial electron transport, ubiquinol to cytochrome c;	GO:0005743|mitochondrial inner membrane;GO:0070469|respiratory chain;	GO:0008121|ubiquinol-cytochrome-c reductase activity;
BGIOSGA012569	1533	1370	1181	2869	2404	2151	0.41967	3.38111e-07	down	Os03g0334700, partial [Oryza sativa Japonica Group]	.	GO:0005789|endoplasmic reticulum membrane;GO:0016021|integral component of membrane;GO:0016020|membrane;GO:0005886|plasma membrane;	GO:0005524|ATP binding;GO:0000287|magnesium ion binding;GO:0004012|phospholipid-translocating ATPase activity;
BGIOSGA011591	9	7	31	0	0	2	17.378	0.00323627	up	RecName: Full=Non-specific lipid-transfer protein 2; Short=nsLTP2; AltName: Full=7 kDa lipid transfer protein; Flags: Precursor	GO:0006869|lipid transport;	.	GO:0008289|lipid binding;	.	.
BGIOSGA005287	8	4	25	0	0	0	48.2587	0.000561425	up	putative senescence-associated protein 5 [Oryza sativa Japonica Group]	GO:0035265|organ growth;	GO:0016021|integral component of membrane;	.	.	.
BGIOSGA016724	1197	2109	1880	853	703	1064	1.51339	0.0218584	up	PREDICTED: Oryza sativa Japonica Group adenine phosphoribosyltransferase 2 (LOC4336327), mRNA	GO:0006168|adenine salvage;GO:0044209|AMP salvage;	GO:0005829|cytosol;GO:0005794|Golgi apparatus;GO:0005886|plasma membrane;	GO:0003999|adenine phosphoribosyltransferase activity;GO:0015114|phosphate ion transmembrane transporter activity;

## Sheet: Proteins
Protein ID	Accession	-10lgP	abundance in WT	abundance in lses1	fold change	Description
24495	tr|B8B6S0|B8B6S0_ORYSI	51.51	3382	1745	0.52	Peroxidase OS=Oryza sativa subsp. indica OX=39946 GN=OsI_24670 PE=3 SV=1
30827	A2ZAT0|NLTP2_ORYSI	40.88	566	346.685	0.61	Non-specific lipid-transfer protein 2 OS=Oryza sativa subsp. indica OX=39946 GN=LTP2-A PE=3 SV=1
25081	tr|A2YBR3|A2YBR3_ORYSI	90.42	503	309.989	0.62	Peroxidase OS=Oryza sativa subsp. indica OX=39946 GN=OsI_22542 PE=3 SV=1
25092	tr|A2ZAQ9|A2ZAQ9_ORYSI	90.42	503	309.989	0.62	Peroxidase OS=Oryza sativa subsp. indica OX=39946 GN=OsI_34840 PE=3 SV=1
9576	tr|Q9LKM2|Q9LKM2_ORYSI	256.4	481.5	315.3	0.65	Phospholipase D OS=Oryza sativa subsp. indica OX=39946 GN=RPLD4 PE=3 SV=1
20412	A2XU53|LIAS_ORYSI	106.07	2150	1423	0.66	Lipoyl synthase mitochondrial OS=Oryza sativa subsp. indica OX=39946 GN=LIP1 PE=3 SV=2
23391	tr|A2YGK4|A2YGK4_ORYSI	101.51	591.5	1091	1.84	Peroxidase OS=Oryza sativa subsp. indica OX=39946 GN=OsI_24309 PE=3 SV=1
23392	tr|A7LBL0|A7LBL0_ORYSI	101.51	591.5	1091	1.84	Peroxidase OS=Oryza sativa subsp. indica OX=39946 GN=LOC_Os06g48030 PE=2 SV=1
29012	tr|B8AL07|B8AL07_ORYSI	56.42	213	621.909	2.92	Phosphatidylserine decarboxylase proenzyme 1 mitochondrial OS=Oryza sativa subsp. indica OX=39946 GN=OsI_09619 PE=3 SV=1
12397	tr|B8AYU7|B8AYU7_ORYSI	191.9	12860	19610	1.52	Aldo-keto reductase OS=Oryza sativa subsp. indica OX=39946 GN=AKR4 PE=2 SV=1
17785	P0C360|PSAC_ORYSI	239.32	405900	628700	1.55	Photosystem I iron-sulfur center OS=Oryza sativa subsp. indica OX=39946 GN=psaC PE=3 SV=1
27418	tr|J7EZD7|J7EZD7_ORYSI	36890	57050	1.55	153.47	7886	Photosystem II reaction center protein H OS=Oryza sativa subsp. indica OX=39946 GN=psbH PE=3 SV=1
27420	P0C421|PSBH_ORYSI	36890	57050	1.55	153.47	7886	Photosystem II reaction center protein H OS=Oryza sativa subsp. indica OX=39946 GN=psbH PE=3 SV=1
17788	tr|J3RG68|J3RG68_ORYSI	405900	628700	1.55	239.32	8899	Photosystem I iron-sulfur center OS=Oryza sativa subsp. indica OX=39946 GN=psaC PE=3 SV=1
29008	tr|B8BAX7|B8BAX7_ORYSI	2818	5059	1.79	77.62	12526	NADH dehydrogenase [ubiquinone] iron-sulfur protein 6 mitochondrial OS=Oryza sativa subsp. indica OX=39946 GN=OsI_27911 PE=3 SV=1
26934	Q53JF7|ASR5_ORYSJ	75.75	3110	4774	1.54	Abscisic stress-ripening protein 5 OS=Oryza sativa subsp. indica OX=39946 GN=ASR5 PE=2 SV=1
19476	tr|Q84P57|Q84P57_ORYSI	141.38	3494	5579	1.6	Adenine phosphoribosyltransferase form 2 APRT OS=Oryza sativa subsp. indica OX=39946 PE=2 SV=1
16436	P0C5D6|SAPK3_ORYSJ	160.54	559.5	1605	2.87	Serine/threonine-protein kinase SAPK3 OS=Oryza sativa subsp. indica OX=39946 GN=SAPK3 PE=1 SV=2
1029	Q01MI9|APX3_ORYSI	209.35	9923	7136	0.72	Probable L-ascorbate peroxidase 3 OS=Oryza sativa subsp. indica OX=39946 GN=APX3 PE=2 SV=1
187	Q10N21|APX1_ORYSJ	321.53	291200	275400	0.95	L-ascorbate peroxidase 1 cytosolic OS=Oryza sativa subsp. japonica OX=39947 GN=APX1 PE=1 SV=1
4691	Q2QYL2|NLT2B_ORYSJ	40.88	566	346.685	0.61	Non-specific lipid-transfer protein 2B OS=Oryza sativa subsp. japonica OX=39947 GN=LTP2-B PE=2 SV=1
