# Supplementary material for: Integration of Transcriptomic And Proteomic Analyses Reveals Several Levels of Metabolic Regulation In The Excess Starch And Early Senescent Leaf Mutant lses1 In Rice
Source: Research Square preprint supplement (doi:10.21203/rs.3.rs-805903/v1), 2021-09-14
Supplement: Supplementary file 8 [file f9929407c6dd2276e5a3f02d.xlsx]

## Sheet: Proteome_peptides
Protein	-10lgP	abundance in WT	abundance in in lses1	fold change	Start	End	Peptide length
tr|A0A1W5HWL6|A0A1W5HWL6_ORYNI	44.6	1585	2037	1.28	467	477	10
tr|Q69X42|Q69X42_ORYSJ	94.3	9446	6534	0.69	423	436	13
tr|Q69X42|Q69X42_ORYSJ	83.95	8088	6135	0.76	423	435	12
tr|Q69X42|Q69X42_ORYSJ	61.95	4420	1921	0.43	509	527	18
tr|Q69X42|Q69X42_ORYSJ	60.24	3006	3104	1.03	505	527	22
tr|Q69X42|Q69X42_ORYSJ	53.48	176.5	222.593	1.26	499	527	28
tr|A2YEZ0|A2YEZ0_ORYSI	94.3	9446	6534	0.69	423	436	13
tr|A2YEZ0|A2YEZ0_ORYSI	83.95	8088	6135	0.76	423	435	12
tr|A2YEZ0|A2YEZ0_ORYSI	61.95	4420	1921	0.43	509	527	18
tr|A2YEZ0|A2YEZ0_ORYSI	60.24	3006	3104	1.03	505	527	22
tr|A2YEZ0|A2YEZ0_ORYSI	53.48	176.5	222.593	1.26	499	527	28
tr|H5ZXH7|H5ZXH7_ORYSI	37.4	12450	9152	0.73	168	175	7
tr|Q32753|Q32753_ORYSA	36.93	255.5	678.402	2.66	320	334	14
tr|Q32753|Q32753_ORYSA	35.07	2539	3152	1.24	277	285	8
tr|Q32753|Q32753_ORYSA	23.49	58.5	287.295	4.91	320	333	13
tr|Q32753|Q32753_ORYSA	21.92	446.5	333.648	0.75	320	330	10
P93431|RCA_ORYSJ	86.9	1602	2019	1.26	423	449	26
P93431|RCA_ORYSJ	67.26	11370	8978	0.79	457	466	9
P93431|RCA_ORYSJ	52.25	42270	31440	0.74	450	456	6
tr|A0A0E0J5L4|A0A0E0J5L4_ORYNI	86.9	1602	2019	1.26	423	449	26
tr|A0A0E0J5L4|A0A0E0J5L4_ORYNI	67.26	11370	8978	0.79	457	466	9
tr|A0A0E0J5L4|A0A0E0J5L4_ORYNI	52.25	42270	31440	0.74	450	456	6
tr|B8BIM0|B8BIM0_ORYSI	86.9	1602	2019	1.26	423	449	26
tr|B8BIM0|B8BIM0_ORYSI	67.26	11370	8978	0.79	457	466	9
tr|B8BIM0|B8BIM0_ORYSI	52.25	42270	31440	0.74	450	456	6
tr|A0A0P0Y838|A0A0P0Y838_ORYSJ	65.31	1756	1767	1.01	259	285	26
tr|A0A0P0Y838|A0A0P0Y838_ORYSJ	39.59	1572	3261	2.07	259	281	22
tr|A0A0P0Y838|A0A0P0Y838_ORYSJ	31.26	441.5	239.01	0.54	259	284	25
tr|A0A0P0Y838|A0A0P0Y838_ORYSJ	30.06	329.5	358.756	1.09	259	282	23
tr|A0A0P0Y838|A0A0P0Y838_ORYSJ	29.62	1312	1810	1.38	259	273	14
tr|B8B5I7|B8B5I7_ORYSI	77.11	13460	74370	5.53	1416	1426	10
tr|B8B5I7|B8B5I7_ORYSI	59.93	8200	26550	3.24	1361	1369	8
tr|B8B5I7|B8B5I7_ORYSI	45.87	342.5	588.592	1.72	757	775	18
tr|A0A1D9CEX0|A0A1D9CEX0_ORYSI	77.11	13460	74370	5.53	1416	1426	10
tr|A0A1D9CEX0|A0A1D9CEX0_ORYSI	59.93	8200	26550	3.24	1361	1369	8
tr|A0A1D9CEX0|A0A1D9CEX0_ORYSI	45.87	342.5	588.592	1.72	757	775	18
Q69RJ0|GLTB_ORYSJ	69.69	34560	11940	0.35	1361	1369	8
Q69RJ0|GLTB_ORYSJ	67.17	61270	21560	0.35	1416	1426	10
tr|Q84ZY2|Q84ZY2_ORYSJ	110.8	20890	19270	0.92	565	585	20
tr|Q84ZY2|Q84ZY2_ORYSJ	107.72	126200	91420	0.72	450	470	20
tr|Q84ZY2|Q84ZY2_ORYSJ	105.55	111100	86720	0.78	450	470	20
tr|Q84ZY2|Q84ZY2_ORYSJ	100.99	93150	77860	0.84	337	350	13
tr|Q84ZY2|Q84ZY2_ORYSJ	99.33	496	264.601	0.53	102	126	24
tr|Q84ZY2|Q84ZY2_ORYSJ	98.88	74900	63110	0.84	725	741	16
tr|Q84ZY2|Q84ZY2_ORYSJ	98.37	37220	31930	0.86	379	393	14
tr|Q84ZY2|Q84ZY2_ORYSJ	98.21	829.5	886.027	1.07	661	678	17
tr|Q84ZY2|Q84ZY2_ORYSJ	97.58	39540	38020	0.96	69	86	17
tr|Q84ZY2|Q84ZY2_ORYSJ	96.79	64730	47230	0.73	286	297	11
tr|Q84ZY2|Q84ZY2_ORYSJ	94.31	8466	6910	0.82	153	169	16
tr|Q84ZY2|Q84ZY2_ORYSJ	93.84	43780	33950	0.78	410	426	16
tr|Q84ZY2|Q84ZY2_ORYSJ	93.72	338500	310200	0.92	427	437	10
tr|Q84ZY2|Q84ZY2_ORYSJ	91.29	49040	43230	0.88	569	585	16
tr|Q84ZY2|Q84ZY2_ORYSJ	90.5	87990	70970	0.81	690	702	12
tr|Q84ZY2|Q84ZY2_ORYSJ	89.96	2984	2222	0.74	68	86	18
tr|Q84ZY2|Q84ZY2_ORYSJ	89.27	129300	94390	0.73	604	617	13
tr|Q84ZY2|Q84ZY2_ORYSJ	86.79	5448	4384	0.8	357	373	16
tr|Q84ZY2|Q84ZY2_ORYSJ	86.38	4712	4877	1.04	565	585	20
tr|Q84ZY2|Q84ZY2_ORYSJ	85.31	10820	9784	0.9	102	118	16
tr|Q84ZY2|Q84ZY2_ORYSJ	82.17	15540	12620	0.81	70	86	16
tr|Q84ZY2|Q84ZY2_ORYSJ	82.08	134000	113900	0.85	679	689	10
tr|Q84ZY2|Q84ZY2_ORYSJ	81.94	25220	15880	0.63	450	465	15
tr|Q84ZY2|Q84ZY2_ORYSJ	81.89	10690	6837	0.64	710	724	14
tr|Q84ZY2|Q84ZY2_ORYSJ	79.48	35930	31320	0.87	325	336	11
tr|Q84ZY2|Q84ZY2_ORYSJ	77.16	10590	8544	0.81	571	585	14
tr|Q84ZY2|Q84ZY2_ORYSJ	76.77	77700	68650	0.88	298	307	9
tr|Q84ZY2|Q84ZY2_ORYSJ	75.93	3518	3049	0.87	114	126	12
tr|Q84ZY2|Q84ZY2_ORYSJ	73.95	9057	7240	0.8	339	350	11
tr|Q84ZY2|Q84ZY2_ORYSJ	72.62	5782	4378	0.76	565	585	20
tr|Q84ZY2|Q84ZY2_ORYSJ	72.03	213.5	600.18	2.81	102	126	24
tr|Q84ZY2|Q84ZY2_ORYSJ	71.26	8410	8617	1.02	117	126	9
tr|Q84ZY2|Q84ZY2_ORYSJ	71	6444	9273	1.44	569	585	16
tr|Q84ZY2|Q84ZY2_ORYSJ	70.81	1177	1498	1.27	315	336	21
tr|Q84ZY2|Q84ZY2_ORYSJ	69.53	41960	33300	0.79	574	585	11
tr|Q84ZY2|Q84ZY2_ORYSJ	69.41	168200	140500	0.84	315	324	9
tr|Q84ZY2|Q84ZY2_ORYSJ	68.75	5611	5251	0.94	565	585	20
tr|Q84ZY2|Q84ZY2_ORYSJ	68.49	40810	33800	0.83	637	647	10
tr|Q84ZY2|Q84ZY2_ORYSJ	67.78	2672	2053	0.77	618	636	18
tr|Q84ZY2|Q84ZY2_ORYSJ	65.93	2466	3035	1.23	102	118	16
tr|Q84ZY2|Q84ZY2_ORYSJ	65.13	115900	97610	0.84	400	409	9
tr|Q84ZY2|Q84ZY2_ORYSJ	64.98	8187	8414	1.03	299	307	8
tr|Q84ZY2|Q84ZY2_ORYSJ	63.78	1836	1152	0.63	491	511	20
tr|Q84ZY2|Q84ZY2_ORYSJ	63.44	6288	6215	0.99	157	169	12
tr|Q84ZY2|Q84ZY2_ORYSJ	63.41	233.5	124.092	0.53	351	373	22
tr|Q84ZY2|Q84ZY2_ORYSJ	63.37	2314	1781	0.77	102	118	16
tr|Q84ZY2|Q84ZY2_ORYSJ	62.68	136400	108100	0.79	716	724	8
tr|Q84ZY2|Q84ZY2_ORYSJ	62.4	3900	5152	1.32	730	741	11
tr|Q84ZY2|Q84ZY2_ORYSJ	61.96	3133	3590	1.15	102	118	16
tr|Q84ZY2|Q84ZY2_ORYSJ	61.62	740	863.333	1.17	102	113	11
tr|Q84ZY2|Q84ZY2_ORYSJ	61.27	1184	910.169	0.77	690	707	17
tr|Q84ZY2|Q84ZY2_ORYSJ	60.08	2670	2450	0.92	218	231	13
tr|Q84ZY2|Q84ZY2_ORYSJ	60.01	892	866.23	0.97	543	564	21
tr|Q84ZY2|Q84ZY2_ORYSJ	59.28	3152	2718	0.86	155	169	14
tr|Q84ZY2|Q84ZY2_ORYSJ	59.12	170800	128300	0.75	93	101	8
tr|Q84ZY2|Q84ZY2_ORYSJ	57.45	1228	798.148	0.65	286	295	9
tr|Q84ZY2|Q84ZY2_ORYSJ	56.59	38210	34660	0.91	131	137	6
tr|Q84ZY2|Q84ZY2_ORYSJ	54.22	3102	2205	0.71	102	116	14
tr|Q84ZY2|Q84ZY2_ORYSJ	53.01	1332	951.694	0.71	325	350	25
tr|Q84ZY2|Q84ZY2_ORYSJ	52.36	18330	16370	0.89	572	585	13
tr|Q84ZY2|Q84ZY2_ORYSJ	52.14	873	496.368	0.57	241	258	17
tr|Q84ZY2|Q84ZY2_ORYSJ	52.07	26110	20590	0.79	401	409	8
tr|Q84ZY2|Q84ZY2_ORYSJ	50.13	17670	16290	0.92	357	366	9
tr|Q84ZY2|Q84ZY2_ORYSJ	50.02	812.5	712.201	0.88	336	350	14
tr|Q84ZY2|Q84ZY2_ORYSJ	49.82	508.5	182.999	0.36	102	126	24
tr|Q84ZY2|Q84ZY2_ORYSJ	49.62	1794	1298	0.72	71	86	15
tr|Q84ZY2|Q84ZY2_ORYSJ	49.05	118500	93760	0.79	119	126	7
tr|Q84ZY2|Q84ZY2_ORYSJ	47.79	1116	1215	1.09	200	212	12
tr|Q84ZY2|Q84ZY2_ORYSJ	46.24	357.5	304.677	0.85	394	409	15
tr|Q84ZY2|Q84ZY2_ORYSJ	46.07	570	203.762	0.36	602	617	15
tr|Q84ZY2|Q84ZY2_ORYSJ	44.88	16130	14820	0.92	286	292	6
tr|Q84ZY2|Q84ZY2_ORYSJ	43.33	1407	2294	1.63	571	585	14
tr|Q84ZY2|Q84ZY2_ORYSJ	42.73	2510	1963	0.78	325	335	10
tr|Q84ZY2|Q84ZY2_ORYSJ	42.05	1236	753.726	0.61	528	538	10
tr|Q84ZY2|Q84ZY2_ORYSJ	41.88	77.5	294.055	3.79	576	585	9
tr|Q84ZY2|Q84ZY2_ORYSJ	40.58	1148	1128	0.98	450	463	13
tr|Q84ZY2|Q84ZY2_ORYSJ	40.16	1004	755.658	0.75	75	86	11
tr|Q84ZY2|Q84ZY2_ORYSJ	39.72	336.5	408.972	1.22	410	422	12
tr|Q84ZY2|Q84ZY2_ORYSJ	39.54	2188	2206	1.01	491	499	8
tr|Q84ZY2|Q84ZY2_ORYSJ	39.26	5521	4471	0.81	394	400	6
tr|Q84ZY2|Q84ZY2_ORYSJ	39.01	18900	19410	1.03	367	373	6
tr|Q84ZY2|Q84ZY2_ORYSJ	38.75	485.5	367.448	0.76	575	585	10
tr|Q84ZY2|Q84ZY2_ORYSJ	38.71	2309	1173	0.51	76	86	10
tr|Q84ZY2|Q84ZY2_ORYSJ	38.68	503.5	600.18	1.19	528	540	12
tr|Q84ZY2|Q84ZY2_ORYSJ	38.5	1013	731.998	0.72	618	630	12
tr|Q84ZY2|Q84ZY2_ORYSJ	37.91	3266	3668	1.12	119	126	7
tr|Q84ZY2|Q84ZY2_ORYSJ	37.91	2440	2641	1.08	315	323	8
tr|Q84ZY2|Q84ZY2_ORYSJ	36.63	3635	2816	0.77	387	393	6
tr|Q84ZY2|Q84ZY2_ORYSJ	35.36	1574	961.834	0.61	665	678	13
tr|Q84ZY2|Q84ZY2_ORYSJ	35.2	363.5	90.293	0.25	450	464	14
tr|Q84ZY2|Q84ZY2_ORYSJ	33.56	1334	1851	1.39	337	345	8
tr|Q84ZY2|Q84ZY2_ORYSJ	33.38	1438	830.499	0.58	314	324	10
tr|Q84ZY2|Q84ZY2_ORYSJ	32.21	931	762.9	0.82	725	735	10
tr|Q84ZY2|Q84ZY2_ORYSJ	31.99	548.5	886.027	1.62	102	116	14
tr|Q84ZY2|Q84ZY2_ORYSJ	31.61	512	430.701	0.84	452	470	18
tr|Q84ZY2|Q84ZY2_ORYSJ	31.24	397.5	360.688	0.91	117	126	9
tr|Q84ZY2|Q84ZY2_ORYSJ	30.9	326.5	107.675	0.33	218	232	14
tr|Q84ZY2|Q84ZY2_ORYSJ	30.67	258.5	37.179	0.14	725	739	14
tr|Q84ZY2|Q84ZY2_ORYSJ	30.48	299.5	130.852	0.44	528	540	12
tr|Q84ZY2|Q84ZY2_ORYSJ	29.47	10.5	300.814	28.65	338	350	12
tr|Q84ZY2|Q84ZY2_ORYSJ	29.41	1904	2344	1.23	491	499	8
tr|Q84ZY2|Q84ZY2_ORYSJ	29.21	515	658.605	1.28	690	700	10
tr|Q84ZY2|Q84ZY2_ORYSJ	28.57	877	763.866	0.87	156	169	13
tr|Q84ZY2|Q84ZY2_ORYSJ	28.24	933.5	872.507	0.93	648	657	9
tr|Q84ZY2|Q84ZY2_ORYSJ	27.94	117.5	168.514	1.43	455	470	15
tr|Q84ZY2|Q84ZY2_ORYSJ	27.53	2494	1368	0.55	586	592	6
tr|Q84ZY2|Q84ZY2_ORYSJ	27.49	491	380.484	0.77	450	467	17
tr|Q84ZY2|Q84ZY2_ORYSJ	27.41	514.5	214.867	0.42	102	113	11
tr|Q84ZY2|Q84ZY2_ORYSJ	26.67	1665	1745	1.05	458	470	12
tr|Q84ZY2|Q84ZY2_ORYSJ	26.54	217.5	377.104	1.73	246	258	12
tr|Q84ZY2|Q84ZY2_ORYSJ	26.44	436.5	400.281	0.92	17	29	12
tr|Q84ZY2|Q84ZY2_ORYSJ	26.24	520.5	318.197	0.61	218	229	11
tr|Q84ZY2|Q84ZY2_ORYSJ	25.01	914.5	983.562	1.08	639	647	8
tr|Q84ZY2|Q84ZY2_ORYSJ	23.18	776.5	1068	1.37	233	258	25
tr|Q84ZY2|Q84ZY2_ORYSJ	22.3	746.5	430.218	0.58	114	126	12
tr|Q84ZY2|Q84ZY2_ORYSJ	22.26	232.5	129.886	0.56	573	585	12
tr|A0A0E0HKI3|A0A0E0HKI3_ORYNI	110.8	20890	19270	0.92	565	585	20
tr|A0A0E0HKI3|A0A0E0HKI3_ORYNI	107.72	126200	91420	0.72	450	470	20
tr|A0A0E0HKI3|A0A0E0HKI3_ORYNI	105.55	111100	86720	0.78	450	470	20
tr|A0A0E0HKI3|A0A0E0HKI3_ORYNI	100.99	93150	77860	0.84	337	350	13
tr|A0A0E0HKI3|A0A0E0HKI3_ORYNI	99.33	496	264.601	0.53	102	126	24
tr|A0A0E0HKI3|A0A0E0HKI3_ORYNI	98.88	74900	63110	0.84	725	741	16
tr|A0A0E0HKI3|A0A0E0HKI3_ORYNI	98.37	37220	31930	0.86	379	393	14
tr|A0A0E0HKI3|A0A0E0HKI3_ORYNI	98.21	829.5	886.027	1.07	661	678	17
tr|A0A0E0HKI3|A0A0E0HKI3_ORYNI	97.58	39540	38020	0.96	69	86	17
tr|A0A0E0HKI3|A0A0E0HKI3_ORYNI	96.79	64730	47230	0.73	286	297	11
tr|A0A0E0HKI3|A0A0E0HKI3_ORYNI	94.31	8466	6910	0.82	153	169	16
tr|A0A0E0HKI3|A0A0E0HKI3_ORYNI	93.84	43780	33950	0.78	410	426	16
tr|A0A0E0HKI3|A0A0E0HKI3_ORYNI	93.72	338500	310200	0.92	427	437	10
tr|A0A0E0HKI3|A0A0E0HKI3_ORYNI	91.29	49040	43230	0.88	569	585	16
tr|A0A0E0HKI3|A0A0E0HKI3_ORYNI	90.5	87990	70970	0.81	690	702	12
tr|A0A0E0HKI3|A0A0E0HKI3_ORYNI	89.96	2984	2222	0.74	68	86	18
tr|A0A0E0HKI3|A0A0E0HKI3_ORYNI	89.27	129300	94390	0.73	604	617	13
tr|A0A0E0HKI3|A0A0E0HKI3_ORYNI	86.79	5448	4384	0.8	357	373	16
tr|A0A0E0HKI3|A0A0E0HKI3_ORYNI	86.38	4712	4877	1.04	565	585	20
tr|A0A0E0HKI3|A0A0E0HKI3_ORYNI	85.31	10820	9784	0.9	102	118	16
tr|A0A0E0HKI3|A0A0E0HKI3_ORYNI	82.17	15540	12620	0.81	70	86	16
tr|A0A0E0HKI3|A0A0E0HKI3_ORYNI	82.08	134000	113900	0.85	679	689	10
tr|A0A0E0HKI3|A0A0E0HKI3_ORYNI	81.94	25220	15880	0.63	450	465	15
tr|A0A0E0HKI3|A0A0E0HKI3_ORYNI	81.89	10690	6837	0.64	710	724	14
tr|A0A0E0HKI3|A0A0E0HKI3_ORYNI	79.48	35930	31320	0.87	325	336	11
tr|A0A0E0HKI3|A0A0E0HKI3_ORYNI	77.16	10590	8544	0.81	571	585	14
tr|A0A0E0HKI3|A0A0E0HKI3_ORYNI	76.77	77700	68650	0.88	298	307	9
tr|A0A0E0HKI3|A0A0E0HKI3_ORYNI	75.93	3518	3049	0.87	114	126	12
tr|A0A0E0HKI3|A0A0E0HKI3_ORYNI	73.95	9057	7240	0.8	339	350	11
tr|A0A0E0HKI3|A0A0E0HKI3_ORYNI	72.62	5782	4378	0.76	565	585	20
tr|A0A0E0HKI3|A0A0E0HKI3_ORYNI	72.03	213.5	600.18	2.81	102	126	24
tr|A0A0E0HKI3|A0A0E0HKI3_ORYNI	71.26	8410	8617	1.02	117	126	9
tr|A0A0E0HKI3|A0A0E0HKI3_ORYNI	71	6444	9273	1.44	569	585	16
tr|A0A0E0HKI3|A0A0E0HKI3_ORYNI	70.81	1177	1498	1.27	315	336	21
tr|A0A0E0HKI3|A0A0E0HKI3_ORYNI	69.53	41960	33300	0.79	574	585	11
tr|A0A0E0HKI3|A0A0E0HKI3_ORYNI	69.41	168200	140500	0.84	315	324	9
tr|A0A0E0HKI3|A0A0E0HKI3_ORYNI	68.75	5611	5251	0.94	565	585	20
tr|A0A0E0HKI3|A0A0E0HKI3_ORYNI	68.49	40810	33800	0.83	637	647	10
tr|A0A0E0HKI3|A0A0E0HKI3_ORYNI	67.78	2672	2053	0.77	618	636	18
tr|A0A0E0HKI3|A0A0E0HKI3_ORYNI	65.93	2466	3035	1.23	102	118	16
tr|A0A0E0HKI3|A0A0E0HKI3_ORYNI	65.13	115900	97610	0.84	400	409	9
tr|A0A0E0HKI3|A0A0E0HKI3_ORYNI	64.98	8187	8414	1.03	299	307	8
tr|A0A0E0HKI3|A0A0E0HKI3_ORYNI	63.78	1836	1152	0.63	491	511	20
tr|A0A0E0HKI3|A0A0E0HKI3_ORYNI	63.44	6288	6215	0.99	157	169	12
tr|A0A0E0HKI3|A0A0E0HKI3_ORYNI	63.41	233.5	124.092	0.53	351	373	22
tr|A0A0E0HKI3|A0A0E0HKI3_ORYNI	63.37	2314	1781	0.77	102	118	16
tr|A0A0E0HKI3|A0A0E0HKI3_ORYNI	62.68	136400	108100	0.79	716	724	8
tr|A0A0E0HKI3|A0A0E0HKI3_ORYNI	62.4	3900	5152	1.32	730	741	11
tr|A0A0E0HKI3|A0A0E0HKI3_ORYNI	61.96	3133	3590	1.15	102	118	16
tr|A0A0E0HKI3|A0A0E0HKI3_ORYNI	61.62	740	863.333	1.17	102	113	11
tr|A0A0E0HKI3|A0A0E0HKI3_ORYNI	61.27	1184	910.169	0.77	690	707	17
tr|A0A0E0HKI3|A0A0E0HKI3_ORYNI	60.08	2670	2450	0.92	218	231	13
tr|A0A0E0HKI3|A0A0E0HKI3_ORYNI	60.01	892	866.23	0.97	543	564	21
tr|A0A0E0HKI3|A0A0E0HKI3_ORYNI	59.28	3152	2718	0.86	155	169	14
tr|A0A0E0HKI3|A0A0E0HKI3_ORYNI	59.12	170800	128300	0.75	93	101	8
tr|A0A0E0HKI3|A0A0E0HKI3_ORYNI	57.45	1228	798.148	0.65	286	295	9
tr|A0A0E0HKI3|A0A0E0HKI3_ORYNI	56.59	38210	34660	0.91	131	137	6
tr|A0A0E0HKI3|A0A0E0HKI3_ORYNI	54.22	3102	2205	0.71	102	116	14
tr|A0A0E0HKI3|A0A0E0HKI3_ORYNI	53.01	1332	951.694	0.71	325	350	25
tr|A0A0E0HKI3|A0A0E0HKI3_ORYNI	52.36	18330	16370	0.89	572	585	13
tr|A0A0E0HKI3|A0A0E0HKI3_ORYNI	52.14	873	496.368	0.57	241	258	17
tr|A0A0E0HKI3|A0A0E0HKI3_ORYNI	52.07	26110	20590	0.79	401	409	8
tr|A0A0E0HKI3|A0A0E0HKI3_ORYNI	50.13	17670	16290	0.92	357	366	9
tr|A0A0E0HKI3|A0A0E0HKI3_ORYNI	50.02	812.5	712.201	0.88	336	350	14
tr|A0A0E0HKI3|A0A0E0HKI3_ORYNI	49.82	508.5	182.999	0.36	102	126	24
tr|A0A0E0HKI3|A0A0E0HKI3_ORYNI	49.62	1794	1298	0.72	71	86	15
tr|A0A0E0HKI3|A0A0E0HKI3_ORYNI	49.05	118500	93760	0.79	119	126	7
tr|A0A0E0HKI3|A0A0E0HKI3_ORYNI	47.79	1116	1215	1.09	200	212	12
tr|A0A0E0HKI3|A0A0E0HKI3_ORYNI	46.24	357.5	304.677	0.85	394	409	15
tr|A0A0E0HKI3|A0A0E0HKI3_ORYNI	46.07	570	203.762	0.36	602	617	15
tr|A0A0E0HKI3|A0A0E0HKI3_ORYNI	44.88	16130	14820	0.92	286	292	6
tr|A0A0E0HKI3|A0A0E0HKI3_ORYNI	43.33	1407	2294	1.63	571	585	14
tr|A0A0E0HKI3|A0A0E0HKI3_ORYNI	42.73	2510	1963	0.78	325	335	10
tr|A0A0E0HKI3|A0A0E0HKI3_ORYNI	42.05	1236	753.726	0.61	528	538	10
tr|A0A0E0HKI3|A0A0E0HKI3_ORYNI	41.88	77.5	294.055	3.79	576	585	9
tr|A0A0E0HKI3|A0A0E0HKI3_ORYNI	40.58	1148	1128	0.98	450	463	13
tr|A0A0E0HKI3|A0A0E0HKI3_ORYNI	40.16	1004	755.658	0.75	75	86	11
tr|A0A0E0HKI3|A0A0E0HKI3_ORYNI	39.72	336.5	408.972	1.22	410	422	12
tr|A0A0E0HKI3|A0A0E0HKI3_ORYNI	39.54	2188	2206	1.01	491	499	8
tr|A0A0E0HKI3|A0A0E0HKI3_ORYNI	39.26	5521	4471	0.81	394	400	6
tr|A0A0E0HKI3|A0A0E0HKI3_ORYNI	39.01	18900	19410	1.03	367	373	6
tr|A0A0E0HKI3|A0A0E0HKI3_ORYNI	38.75	485.5	367.448	0.76	575	585	10
tr|A0A0E0HKI3|A0A0E0HKI3_ORYNI	38.71	2309	1173	0.51	76	86	10
tr|A0A0E0HKI3|A0A0E0HKI3_ORYNI	38.68	503.5	600.18	1.19	528	540	12
tr|A0A0E0HKI3|A0A0E0HKI3_ORYNI	38.5	1013	731.998	0.72	618	630	12
tr|A0A0E0HKI3|A0A0E0HKI3_ORYNI	37.91	3266	3668	1.12	119	126	7
tr|A0A0E0HKI3|A0A0E0HKI3_ORYNI	37.91	2440	2641	1.08	315	323	8
tr|A0A0E0HKI3|A0A0E0HKI3_ORYNI	36.63	3635	2816	0.77	387	393	6
tr|A0A0E0HKI3|A0A0E0HKI3_ORYNI	35.36	1574	961.834	0.61	665	678	13
tr|A0A0E0HKI3|A0A0E0HKI3_ORYNI	35.2	363.5	90.293	0.25	450	464	14
tr|A0A0E0HKI3|A0A0E0HKI3_ORYNI	33.56	1334	1851	1.39	337	345	8
tr|A0A0E0HKI3|A0A0E0HKI3_ORYNI	33.38	1438	830.499	0.58	314	324	10
tr|A0A0E0HKI3|A0A0E0HKI3_ORYNI	32.21	931	762.9	0.82	725	735	10
tr|A0A0E0HKI3|A0A0E0HKI3_ORYNI	31.99	548.5	886.027	1.62	102	116	14
tr|A0A0E0HKI3|A0A0E0HKI3_ORYNI	31.61	512	430.701	0.84	452	470	18
tr|A0A0E0HKI3|A0A0E0HKI3_ORYNI	31.24	397.5	360.688	0.91	117	126	9
tr|A0A0E0HKI3|A0A0E0HKI3_ORYNI	30.9	326.5	107.675	0.33	218	232	14
tr|A0A0E0HKI3|A0A0E0HKI3_ORYNI	30.67	258.5	37.179	0.14	725	739	14
tr|A0A0E0HKI3|A0A0E0HKI3_ORYNI	30.48	299.5	130.852	0.44	528	540	12
tr|A0A0E0HKI3|A0A0E0HKI3_ORYNI	29.47	10.5	300.814	28.65	338	350	12
tr|A0A0E0HKI3|A0A0E0HKI3_ORYNI	29.41	1904	2344	1.23	491	499	8
tr|A0A0E0HKI3|A0A0E0HKI3_ORYNI	29.21	515	658.605	1.28	690	700	10
tr|A0A0E0HKI3|A0A0E0HKI3_ORYNI	28.57	877	763.866	0.87	156	169	13
tr|A0A0E0HKI3|A0A0E0HKI3_ORYNI	28.24	933.5	872.507	0.93	648	657	9
tr|A0A0E0HKI3|A0A0E0HKI3_ORYNI	27.94	117.5	168.514	1.43	455	470	15
tr|A0A0E0HKI3|A0A0E0HKI3_ORYNI	27.53	2494	1368	0.55	586	592	6
tr|A0A0E0HKI3|A0A0E0HKI3_ORYNI	27.49	491	380.484	0.77	450	467	17
tr|A0A0E0HKI3|A0A0E0HKI3_ORYNI	27.41	514.5	214.867	0.42	102	113	11
tr|A0A0E0HKI3|A0A0E0HKI3_ORYNI	26.67	1665	1745	1.05	458	470	12
tr|A0A0E0HKI3|A0A0E0HKI3_ORYNI	26.54	217.5	377.104	1.73	246	258	12
tr|A0A0E0HKI3|A0A0E0HKI3_ORYNI	26.44	436.5	400.281	0.92	17	29	12
tr|A0A0E0HKI3|A0A0E0HKI3_ORYNI	26.24	520.5	318.197	0.61	218	229	11
tr|A0A0E0HKI3|A0A0E0HKI3_ORYNI	25.01	914.5	983.562	1.08	639	647	8
tr|A0A0E0HKI3|A0A0E0HKI3_ORYNI	23.18	776.5	1068	1.37	233	258	25
tr|A0A0E0HKI3|A0A0E0HKI3_ORYNI	22.3	746.5	430.218	0.58	114	126	12
tr|A0A0E0HKI3|A0A0E0HKI3_ORYNI	22.26	232.5	129.886	0.56	573	585	12
tr|Q0DB64|Q0DB64_ORYSJ	49.26	3764	2854	0.76	159	169	10
tr|Q0DB64|Q0DB64_ORYSJ	40.58	826.5	929.483	1.12	159	169	10
tr|Q0DB64|Q0DB64_ORYSJ	34.22	0	441.806	256	157	169	12
tr|Q0DB64|Q0DB64_ORYSJ	21.59	213.5	499.748	2.34	158	169	11
tr|A0A1W5HS31|A0A1W5HS31_ORYNI	67.75	654	89.327	0.14	88	110	22
tr|Q2QW50|Q2QW50_ORYSJ	56.8	436.5	14.003	0.03	121	140	19
tr|A0A0E0HGC5|A0A0E0HGC5_ORYNI	70.09	2378	3351	1.41	469	484	15
tr|A0A0E0HGC6|A0A0E0HGC6_ORYNI	24.66	352.5	321.094	0.91	469	484	15
tr|A0A0P0WP33|A0A0P0WP33_ORYSJ	24.66	352.5	321.094	0.91	469	484	15
tr|Q943W1|Q943W1_ORYSJ	121.26	78360	84620	1.08	249	265	16
tr|Q943W1|Q943W1_ORYSJ	120.82	51670	49740	0.96	249	273	24
tr|Q943W1|Q943W1_ORYSJ	111.73	20410	17500	0.86	218	238	20
tr|Q943W1|Q943W1_ORYSJ	109.51	40160	37560	0.94	108	128	20
tr|Q943W1|Q943W1_ORYSJ	107.9	58210	53090	0.91	193	209	16
tr|Q943W1|Q943W1_ORYSJ	106.08	155200	121300	0.78	278	292	14
tr|Q943W1|Q943W1_ORYSJ	95	1918	1234	0.64	108	125	17
tr|Q943W1|Q943W1_ORYSJ	91.91	15710	16030	1.02	136	147	11
tr|Q943W1|Q943W1_ORYSJ	88.8	8218	8016	0.98	249	277	28
tr|Q943W1|Q943W1_ORYSJ	88.17	3545	2306	0.65	279	292	13
tr|Q943W1|Q943W1_ORYSJ	83.37	164100	128300	0.78	137	147	10
tr|Q943W1|Q943W1_ORYSJ	80.51	7864	5423	0.69	168	188	20
tr|Q943W1|Q943W1_ORYSJ	78.44	4075	5132	1.26	251	265	14
tr|Q943W1|Q943W1_ORYSJ	78.41	21580	18690	0.87	218	232	14
tr|Q943W1|Q943W1_ORYSJ	74.79	40440	18100	0.45	257	277	20
tr|Q943W1|Q943W1_ORYSJ	74.3	7276	6321	0.87	114	128	14
tr|Q943W1|Q943W1_ORYSJ	74.28	77350	77800	1.01	266	277	11
tr|Q943W1|Q943W1_ORYSJ	73.86	2033	1739	0.86	137	153	16
tr|Q943W1|Q943W1_ORYSJ	68.9	5214	5188	0.99	305	317	12
tr|Q943W1|Q943W1_ORYSJ	67.83	48500	27570	0.57	257	273	16
tr|Q943W1|Q943W1_ORYSJ	67.37	2744	3037	1.11	171	188	17
tr|Q943W1|Q943W1_ORYSJ	67.17	34120	28650	0.84	92	101	9
tr|Q943W1|Q943W1_ORYSJ	65.01	72760	68590	0.94	266	273	7
tr|Q943W1|Q943W1_ORYSJ	62.38	104500	75380	0.72	210	217	7
tr|Q943W1|Q943W1_ORYSJ	61.42	125600	102200	0.81	93	101	8
tr|Q943W1|Q943W1_ORYSJ	59.52	30790	25440	0.83	239	246	7
tr|Q943W1|Q943W1_ORYSJ	59.49	41500	33060	0.8	324	333	9
tr|Q943W1|Q943W1_ORYSJ	57.56	134400	106600	0.79	154	161	7
tr|Q943W1|Q943W1_ORYSJ	57.46	1710	1930	1.13	280	292	12
tr|Q943W1|Q943W1_ORYSJ	54.39	12470	13690	1.1	229	238	9
tr|Q943W1|Q943W1_ORYSJ	53.1	391.5	419.595	1.07	247	265	18
tr|Q943W1|Q943W1_ORYSJ	51.63	2648	1155	0.44	260	273	13
tr|Q943W1|Q943W1_ORYSJ	51.32	206.5	109.607	0.53	223	238	15
tr|Q943W1|Q943W1_ORYSJ	49.37	8172	8322	1.02	218	228	10
tr|Q943W1|Q943W1_ORYSJ	49.3	4244	4745	1.12	266	276	10
tr|Q943W1|Q943W1_ORYSJ	48.17	2334	2638	1.13	218	236	18
tr|Q943W1|Q943W1_ORYSJ	48.12	11670	5749	0.49	129	136	7
tr|Q943W1|Q943W1_ORYSJ	47.63	21310	14610	0.69	137	144	7
tr|Q943W1|Q943W1_ORYSJ	46.94	2084	2439	1.17	250	265	15
tr|Q943W1|Q943W1_ORYSJ	43.53	30870	22870	0.74	257	265	8
tr|Q943W1|Q943W1_ORYSJ	42.89	5503	4525	0.82	138	147	9
tr|Q943W1|Q943W1_ORYSJ	41.98	6256	5847	0.93	136	144	8
tr|Q943W1|Q943W1_ORYSJ	40.27	0	488.16	256	274	292	18
tr|Q943W1|Q943W1_ORYSJ	38.98	2200	1468	0.67	266	275	9
tr|Q943W1|Q943W1_ORYSJ	37.96	322.5	340.408	1.06	219	238	19
tr|Q943W1|Q943W1_ORYSJ	37.1	872.5	929.483	1.07	251	273	22
tr|Q943W1|Q943W1_ORYSJ	33.24	694.5	703.51	1.01	262	273	11
tr|Q943W1|Q943W1_ORYSJ	32.57	178.5	157.891	0.88	293	317	24
tr|Q943W1|Q943W1_ORYSJ	32.24	8960	7226	0.81	129	135	6
tr|Q943W1|Q943W1_ORYSJ	30.79	274.5	152.097	0.55	194	209	15
tr|Q943W1|Q943W1_ORYSJ	30.18	319.5	185.897	0.58	263	277	14
tr|Q943W1|Q943W1_ORYSJ	29.36	273.5	300.814	1.1	266	272	6
tr|Q943W1|Q943W1_ORYSJ	26.51	4255	2721	0.64	286	292	6
tr|Q943W1|Q943W1_ORYSJ	26.28	1574	1007	0.64	101	107	6
tr|Q943W1|Q943W1_ORYSJ	26.03	733.5	451.463	0.62	225	238	13
tr|Q943W1|Q943W1_ORYSJ	23.79	1914	1335	0.7	95	101	6
tr|Q943W1|Q943W1_ORYSJ	23.15	1062	956.522	0.9	154	163	9
tr|Q943W1|Q943W1_ORYSJ	22.76	343.5	464.983	1.35	199	209	10
tr|Q943W1|Q943W1_ORYSJ	21.7	1020	1497	1.47	259	273	14
tr|B8A8L8|B8A8L8_ORYSI	121.26	78360	84620	1.08	249	265	16
tr|B8A8L8|B8A8L8_ORYSI	120.82	51670	49740	0.96	249	273	24
tr|B8A8L8|B8A8L8_ORYSI	111.73	20410	17500	0.86	218	238	20
tr|B8A8L8|B8A8L8_ORYSI	109.51	40160	37560	0.94	108	128	20
tr|B8A8L8|B8A8L8_ORYSI	107.9	58210	53090	0.91	193	209	16
tr|B8A8L8|B8A8L8_ORYSI	106.08	155200	121300	0.78	278	292	14
tr|B8A8L8|B8A8L8_ORYSI	95	1918	1234	0.64	108	125	17
tr|B8A8L8|B8A8L8_ORYSI	91.91	15710	16030	1.02	136	147	11
tr|B8A8L8|B8A8L8_ORYSI	88.8	8218	8016	0.98	249	277	28
tr|B8A8L8|B8A8L8_ORYSI	88.17	3545	2306	0.65	279	292	13
tr|B8A8L8|B8A8L8_ORYSI	83.37	164100	128300	0.78	137	147	10
tr|B8A8L8|B8A8L8_ORYSI	80.51	7864	5423	0.69	168	188	20
tr|B8A8L8|B8A8L8_ORYSI	78.44	4075	5132	1.26	251	265	14
tr|B8A8L8|B8A8L8_ORYSI	78.41	21580	18690	0.87	218	232	14
tr|B8A8L8|B8A8L8_ORYSI	74.79	40440	18100	0.45	257	277	20
tr|B8A8L8|B8A8L8_ORYSI	74.3	7276	6321	0.87	114	128	14
tr|B8A8L8|B8A8L8_ORYSI	74.28	77350	77800	1.01	266	277	11
tr|B8A8L8|B8A8L8_ORYSI	73.86	2033	1739	0.86	137	153	16
tr|B8A8L8|B8A8L8_ORYSI	68.9	5214	5188	0.99	305	317	12
tr|B8A8L8|B8A8L8_ORYSI	67.83	48500	27570	0.57	257	273	16
tr|B8A8L8|B8A8L8_ORYSI	67.37	2744	3037	1.11	171	188	17
tr|B8A8L8|B8A8L8_ORYSI	67.17	34120	28650	0.84	92	101	9
tr|B8A8L8|B8A8L8_ORYSI	65.01	72760	68590	0.94	266	273	7
tr|B8A8L8|B8A8L8_ORYSI	62.38	104500	75380	0.72	210	217	7
tr|B8A8L8|B8A8L8_ORYSI	61.42	125600	102200	0.81	93	101	8
tr|B8A8L8|B8A8L8_ORYSI	59.52	30790	25440	0.83	239	246	7
tr|B8A8L8|B8A8L8_ORYSI	59.49	41500	33060	0.8	324	333	9
tr|B8A8L8|B8A8L8_ORYSI	57.56	134400	106600	0.79	154	161	7
tr|B8A8L8|B8A8L8_ORYSI	57.46	1710	1930	1.13	280	292	12
tr|B8A8L8|B8A8L8_ORYSI	54.39	12470	13690	1.1	229	238	9
tr|B8A8L8|B8A8L8_ORYSI	53.1	391.5	419.595	1.07	247	265	18
tr|B8A8L8|B8A8L8_ORYSI	51.63	2648	1155	0.44	260	273	13
tr|B8A8L8|B8A8L8_ORYSI	51.32	206.5	109.607	0.53	223	238	15
tr|B8A8L8|B8A8L8_ORYSI	49.37	8172	8322	1.02	218	228	10
tr|B8A8L8|B8A8L8_ORYSI	49.3	4244	4745	1.12	266	276	10
tr|B8A8L8|B8A8L8_ORYSI	48.17	2334	2638	1.13	218	236	18
tr|B8A8L8|B8A8L8_ORYSI	48.12	11670	5749	0.49	129	136	7
tr|B8A8L8|B8A8L8_ORYSI	47.63	21310	14610	0.69	137	144	7
tr|B8A8L8|B8A8L8_ORYSI	46.94	2084	2439	1.17	250	265	15
tr|B8A8L8|B8A8L8_ORYSI	43.53	30870	22870	0.74	257	265	8
tr|B8A8L8|B8A8L8_ORYSI	42.89	5503	4525	0.82	138	147	9
tr|B8A8L8|B8A8L8_ORYSI	41.98	6256	5847	0.93	136	144	8
tr|B8A8L8|B8A8L8_ORYSI	40.27	0	488.16	256	274	292	18
tr|B8A8L8|B8A8L8_ORYSI	38.98	2200	1468	0.67	266	275	9
tr|B8A8L8|B8A8L8_ORYSI	37.96	322.5	340.408	1.06	219	238	19
tr|B8A8L8|B8A8L8_ORYSI	37.1	872.5	929.483	1.07	251	273	22
tr|B8A8L8|B8A8L8_ORYSI	33.24	694.5	703.51	1.01	262	273	11
tr|B8A8L8|B8A8L8_ORYSI	32.57	178.5	157.891	0.88	293	317	24
tr|B8A8L8|B8A8L8_ORYSI	32.24	8960	7226	0.81	129	135	6
tr|B8A8L8|B8A8L8_ORYSI	30.79	274.5	152.097	0.55	194	209	15
tr|B8A8L8|B8A8L8_ORYSI	30.18	319.5	185.897	0.58	263	277	14
tr|B8A8L8|B8A8L8_ORYSI	29.36	273.5	300.814	1.1	266	272	6
tr|B8A8L8|B8A8L8_ORYSI	26.51	4255	2721	0.64	286	292	6
tr|B8A8L8|B8A8L8_ORYSI	26.28	1574	1007	0.64	101	107	6
tr|B8A8L8|B8A8L8_ORYSI	26.03	733.5	451.463	0.62	225	238	13
tr|B8A8L8|B8A8L8_ORYSI	23.79	1914	1335	0.7	95	101	6
tr|B8A8L8|B8A8L8_ORYSI	23.15	1062	956.522	0.9	154	163	9
tr|B8A8L8|B8A8L8_ORYSI	22.76	343.5	464.983	1.35	199	209	10
tr|B8A8L8|B8A8L8_ORYSI	21.7	1020	1497	1.47	259	273	14
tr|A0A0E0FLT8|A0A0E0FLT8_ORYNI	121.26	78360	84620	1.08	249	265	16
tr|A0A0E0FLT8|A0A0E0FLT8_ORYNI	120.82	51670	49740	0.96	249	273	24
tr|A0A0E0FLT8|A0A0E0FLT8_ORYNI	111.73	20410	17500	0.86	218	238	20
tr|A0A0E0FLT8|A0A0E0FLT8_ORYNI	109.51	40160	37560	0.94	108	128	20
tr|A0A0E0FLT8|A0A0E0FLT8_ORYNI	107.9	58210	53090	0.91	193	209	16
tr|A0A0E0FLT8|A0A0E0FLT8_ORYNI	106.08	155200	121300	0.78	278	292	14
tr|A0A0E0FLT8|A0A0E0FLT8_ORYNI	95	1918	1234	0.64	108	125	17
tr|A0A0E0FLT8|A0A0E0FLT8_ORYNI	91.91	15710	16030	1.02	136	147	11
tr|A0A0E0FLT8|A0A0E0FLT8_ORYNI	88.8	8218	8016	0.98	249	277	28
tr|A0A0E0FLT8|A0A0E0FLT8_ORYNI	88.17	3545	2306	0.65	279	292	13
tr|A0A0E0FLT8|A0A0E0FLT8_ORYNI	83.37	164100	128300	0.78	137	147	10
tr|A0A0E0FLT8|A0A0E0FLT8_ORYNI	80.51	7864	5423	0.69	168	188	20
tr|A0A0E0FLT8|A0A0E0FLT8_ORYNI	78.44	4075	5132	1.26	251	265	14
tr|A0A0E0FLT8|A0A0E0FLT8_ORYNI	78.41	21580	18690	0.87	218	232	14
tr|A0A0E0FLT8|A0A0E0FLT8_ORYNI	74.79	40440	18100	0.45	257	277	20
tr|A0A0E0FLT8|A0A0E0FLT8_ORYNI	74.3	7276	6321	0.87	114	128	14
tr|A0A0E0FLT8|A0A0E0FLT8_ORYNI	74.28	77350	77800	1.01	266	277	11
tr|A0A0E0FLT8|A0A0E0FLT8_ORYNI	73.86	2033	1739	0.86	137	153	16
tr|A0A0E0FLT8|A0A0E0FLT8_ORYNI	68.9	5214	5188	0.99	305	317	12
tr|A0A0E0FLT8|A0A0E0FLT8_ORYNI	67.83	48500	27570	0.57	257	273	16
tr|A0A0E0FLT8|A0A0E0FLT8_ORYNI	67.37	2744	3037	1.11	171	188	17
tr|A0A0E0FLT8|A0A0E0FLT8_ORYNI	67.17	34120	28650	0.84	92	101	9
tr|A0A0E0FLT8|A0A0E0FLT8_ORYNI	65.01	72760	68590	0.94	266	273	7
tr|A0A0E0FLT8|A0A0E0FLT8_ORYNI	62.38	104500	75380	0.72	210	217	7
tr|A0A0E0FLT8|A0A0E0FLT8_ORYNI	61.42	125600	102200	0.81	93	101	8
tr|A0A0E0FLT8|A0A0E0FLT8_ORYNI	59.52	30790	25440	0.83	239	246	7
tr|A0A0E0FLT8|A0A0E0FLT8_ORYNI	59.49	41500	33060	0.8	324	333	9
tr|A0A0E0FLT8|A0A0E0FLT8_ORYNI	57.56	134400	106600	0.79	154	161	7
tr|A0A0E0FLT8|A0A0E0FLT8_ORYNI	57.46	1710	1930	1.13	280	292	12
tr|A0A0E0FLT8|A0A0E0FLT8_ORYNI	54.39	12470	13690	1.1	229	238	9
tr|A0A0E0FLT8|A0A0E0FLT8_ORYNI	53.1	391.5	419.595	1.07	247	265	18
tr|A0A0E0FLT8|A0A0E0FLT8_ORYNI	51.63	2648	1155	0.44	260	273	13
tr|A0A0E0FLT8|A0A0E0FLT8_ORYNI	51.32	206.5	109.607	0.53	223	238	15
tr|A0A0E0FLT8|A0A0E0FLT8_ORYNI	49.37	8172	8322	1.02	218	228	10
tr|A0A0E0FLT8|A0A0E0FLT8_ORYNI	49.3	4244	4745	1.12	266	276	10
tr|A0A0E0FLT8|A0A0E0FLT8_ORYNI	48.17	2334	2638	1.13	218	236	18
tr|A0A0E0FLT8|A0A0E0FLT8_ORYNI	48.12	11670	5749	0.49	129	136	7
tr|A0A0E0FLT8|A0A0E0FLT8_ORYNI	47.63	21310	14610	0.69	137	144	7
tr|A0A0E0FLT8|A0A0E0FLT8_ORYNI	46.94	2084	2439	1.17	250	265	15
tr|A0A0E0FLT8|A0A0E0FLT8_ORYNI	43.53	30870	22870	0.74	257	265	8
tr|A0A0E0FLT8|A0A0E0FLT8_ORYNI	42.89	5503	4525	0.82	138	147	9
tr|A0A0E0FLT8|A0A0E0FLT8_ORYNI	41.98	6256	5847	0.93	136	144	8
tr|A0A0E0FLT8|A0A0E0FLT8_ORYNI	40.27	0	488.16	256	274	292	18
tr|A0A0E0FLT8|A0A0E0FLT8_ORYNI	38.98	2200	1468	0.67	266	275	9
tr|A0A0E0FLT8|A0A0E0FLT8_ORYNI	37.96	322.5	340.408	1.06	219	238	19
tr|A0A0E0FLT8|A0A0E0FLT8_ORYNI	37.1	872.5	929.483	1.07	251	273	22
tr|A0A0E0FLT8|A0A0E0FLT8_ORYNI	33.24	694.5	703.51	1.01	262	273	11
tr|A0A0E0FLT8|A0A0E0FLT8_ORYNI	32.57	178.5	157.891	0.88	293	317	24
tr|A0A0E0FLT8|A0A0E0FLT8_ORYNI	32.24	8960	7226	0.81	129	135	6
tr|A0A0E0FLT8|A0A0E0FLT8_ORYNI	30.79	274.5	152.097	0.55	194	209	15
tr|A0A0E0FLT8|A0A0E0FLT8_ORYNI	30.18	319.5	185.897	0.58	263	277	14
tr|A0A0E0FLT8|A0A0E0FLT8_ORYNI	29.36	273.5	300.814	1.1	266	272	6
tr|A0A0E0FLT8|A0A0E0FLT8_ORYNI	26.51	4255	2721	0.64	286	292	6
tr|A0A0E0FLT8|A0A0E0FLT8_ORYNI	26.28	1574	1007	0.64	101	107	6
tr|A0A0E0FLT8|A0A0E0FLT8_ORYNI	26.03	733.5	451.463	0.62	225	238	13
tr|A0A0E0FLT8|A0A0E0FLT8_ORYNI	23.79	1914	1335	0.7	95	101	6
tr|A0A0E0FLT8|A0A0E0FLT8_ORYNI	23.15	1062	956.522	0.9	154	163	9
tr|A0A0E0FLT8|A0A0E0FLT8_ORYNI	22.76	343.5	464.983	1.35	199	209	10
tr|A0A0E0FLT8|A0A0E0FLT8_ORYNI	21.7	1020	1497	1.47	259	273	14
tr|Q7DNB0|Q7DNB0_ORYSJ	86.42	3992	2689	0.67	464	480	16
tr|Q7DNB0|Q7DNB0_ORYSJ	84.52	39740	41580	1.05	467	480	13
tr|Q7DNB0|Q7DNB0_ORYSJ	59.41	17080	16130	0.94	501	507	6
tr|Q7DNB0|Q7DNB0_ORYSJ	51.05	4734	5728	1.21	470	480	10
tr|Q7DNB0|Q7DNB0_ORYSJ	23.47	449.5	194.588	0.43	467	478	11
tr|A0A0K0LKP6|A0A0K0LKP6_ORYSA	86.42	3992	2689	0.67	464	480	16
tr|A0A0K0LKP6|A0A0K0LKP6_ORYSA	84.52	39740	41580	1.05	467	480	13
tr|A0A0K0LKP6|A0A0K0LKP6_ORYSA	59.41	17080	16130	0.94	501	507	6
tr|A0A0K0LKP6|A0A0K0LKP6_ORYSA	51.05	4734	5728	1.21	470	480	10
tr|A0A0K0LKP6|A0A0K0LKP6_ORYSA	23.47	449.5	194.588	0.43	467	478	11
Q6ENH7|ATPA_ORYNI	86.42	3992	2689	0.67	464	480	16
Q6ENH7|ATPA_ORYNI	84.52	39740	41580	1.05	467	480	13
Q6ENH7|ATPA_ORYNI	59.41	17080	16130	0.94	501	507	6
Q6ENH7|ATPA_ORYNI	51.05	4734	5728	1.21	470	480	10
Q6ENH7|ATPA_ORYNI	23.47	449.5	194.588	0.43	467	478	11
tr|A0A0N9E0I1|A0A0N9E0I1_ORYSJ	86.42	3992	2689	0.67	464	480	16
tr|A0A0N9E0I1|A0A0N9E0I1_ORYSJ	84.52	39740	41580	1.05	467	480	13
tr|A0A0N9E0I1|A0A0N9E0I1_ORYSJ	59.41	17080	16130	0.94	501	507	6
tr|A0A0N9E0I1|A0A0N9E0I1_ORYSJ	51.05	4734	5728	1.21	470	480	10
tr|A0A0N9E0I1|A0A0N9E0I1_ORYSJ	23.47	449.5	194.588	0.43	467	478	11
tr|A0A0K0LRZ0|A0A0K0LRZ0_ORYNI	86.42	3992	2689	0.67	464	480	16
tr|A0A0K0LRZ0|A0A0K0LRZ0_ORYNI	84.52	39740	41580	1.05	467	480	13
tr|A0A0K0LRZ0|A0A0K0LRZ0_ORYNI	59.41	17080	16130	0.94	501	507	6
tr|A0A0K0LRZ0|A0A0K0LRZ0_ORYNI	51.05	4734	5728	1.21	470	480	10
tr|A0A0K0LRZ0|A0A0K0LRZ0_ORYNI	23.47	449.5	194.588	0.43	467	478	11
P0C2Z4|ATPA_ORYSA	86.42	3992	2689	0.67	464	480	16
P0C2Z4|ATPA_ORYSA	84.52	39740	41580	1.05	467	480	13
P0C2Z4|ATPA_ORYSA	59.41	17080	16130	0.94	501	507	6
P0C2Z4|ATPA_ORYSA	51.05	4734	5728	1.21	470	480	10
P0C2Z4|ATPA_ORYSA	23.47	449.5	194.588	0.43	467	478	11
tr|A0A0N9E0P2|A0A0N9E0P2_ORYSJ	86.42	3992	2689	0.67	464	480	16
tr|A0A0N9E0P2|A0A0N9E0P2_ORYSJ	84.52	39740	41580	1.05	467	480	13
tr|A0A0N9E0P2|A0A0N9E0P2_ORYSJ	59.41	17080	16130	0.94	501	507	6
tr|A0A0N9E0P2|A0A0N9E0P2_ORYSJ	51.05	4734	5728	1.21	470	480	10
tr|A0A0N9E0P2|A0A0N9E0P2_ORYSJ	23.47	449.5	194.588	0.43	467	478	11
P0C2Z5|ATPA_ORYSI	86.42	3992	2689	0.67	464	480	16
P0C2Z5|ATPA_ORYSI	84.52	39740	41580	1.05	467	480	13
P0C2Z5|ATPA_ORYSI	59.41	17080	16130	0.94	501	507	6
P0C2Z5|ATPA_ORYSI	51.05	4734	5728	1.21	470	480	10
P0C2Z5|ATPA_ORYSI	23.47	449.5	194.588	0.43	467	478	11
tr|J3R7S9|J3R7S9_ORYSI	86.42	3992	2689	0.67	464	480	16
tr|J3R7S9|J3R7S9_ORYSI	84.52	39740	41580	1.05	467	480	13
tr|J3R7S9|J3R7S9_ORYSI	59.41	17080	16130	0.94	501	507	6
tr|J3R7S9|J3R7S9_ORYSI	51.05	4734	5728	1.21	470	480	10
tr|J3R7S9|J3R7S9_ORYSI	23.47	449.5	194.588	0.43	467	478	11
P0C2Z6|ATPA_ORYSJ	86.42	3992	2689	0.67	464	480	16
P0C2Z6|ATPA_ORYSJ	84.52	39740	41580	1.05	467	480	13
P0C2Z6|ATPA_ORYSJ	59.41	17080	16130	0.94	501	507	6
P0C2Z6|ATPA_ORYSJ	51.05	4734	5728	1.21	470	480	10
P0C2Z6|ATPA_ORYSJ	23.47	449.5	194.588	0.43	467	478	11
tr|E9KIN8|E9KIN8_ORYSJ	86.42	3992	2689	0.67	490	506	16
tr|E9KIN8|E9KIN8_ORYSJ	84.52	39740	41580	1.05	493	506	13
tr|E9KIN8|E9KIN8_ORYSJ	59.41	17080	16130	0.94	527	533	6
tr|E9KIN8|E9KIN8_ORYSJ	51.05	4734	5728	1.21	496	506	10
tr|E9KIN8|E9KIN8_ORYSJ	23.47	449.5	194.588	0.43	493	504	11
tr|A2XU83|A2XU83_ORYSI	123.19	15020	12100	0.81	114	138	24
tr|A2XU83|A2XU83_ORYSI	103.12	61240	55460	0.91	89	106	17
tr|A2XU83|A2XU83_ORYSI	101.77	28470	25160	0.88	338	353	15
tr|A2XU83|A2XU83_ORYSI	99.66	51430	42050	0.82	376	389	13
tr|A2XU83|A2XU83_ORYSI	96.52	94880	70520	0.74	390	402	12
tr|A2XU83|A2XU83_ORYSI	72.01	1076	925.137	0.86	354	375	21
tr|A2XU83|A2XU83_ORYSI	60.74	2847	3069	1.08	114	126	12
tr|A2XU83|A2XU83_ORYSI	60.03	372.5	81.601	0.22	354	375	21
tr|A2XU83|A2XU83_ORYSI	58.66	6120	5166	0.84	91	106	15
tr|A2XU83|A2XU83_ORYSI	44.62	154	573.624	3.72	114	131	17
tr|A2XU83|A2XU83_ORYSI	41.47	5145	4244	0.82	390	399	9
tr|A2XU83|A2XU83_ORYSI	39.99	7210	6639	0.92	376	386	10
tr|A2XU83|A2XU83_ORYSI	36.12	225.5	277.638	1.23	354	375	21
tr|A2XU83|A2XU83_ORYSI	33.08	394.5	86.43	0.22	89	100	11
tr|A2XU83|A2XU83_ORYSI	32.75	211	365.033	1.73	390	401	11
tr|A2XU83|A2XU83_ORYSI	31.67	685	378.553	0.55	390	400	10
tr|A2XU83|A2XU83_ORYSI	26.52	1462	613.7	0.42	365	375	10
tr|A2XU83|A2XU83_ORYSI	24.58	480.5	520.993	1.08	376	390	14
tr|A2XU83|A2XU83_ORYSI	24.5	159.5	211.97	1.33	354	375	21
tr|A0A0E0H1P0|A0A0E0H1P0_ORYNI	123.19	15020	12100	0.81	114	138	24
tr|A0A0E0H1P0|A0A0E0H1P0_ORYNI	103.12	61240	55460	0.91	89	106	17
tr|A0A0E0H1P0|A0A0E0H1P0_ORYNI	101.77	28470	25160	0.88	338	353	15
tr|A0A0E0H1P0|A0A0E0H1P0_ORYNI	99.66	51430	42050	0.82	376	389	13
tr|A0A0E0H1P0|A0A0E0H1P0_ORYNI	96.52	94880	70520	0.74	390	402	12
tr|A0A0E0H1P0|A0A0E0H1P0_ORYNI	72.01	1076	925.137	0.86	354	375	21
tr|A0A0E0H1P0|A0A0E0H1P0_ORYNI	60.74	2847	3069	1.08	114	126	12
tr|A0A0E0H1P0|A0A0E0H1P0_ORYNI	60.03	372.5	81.601	0.22	354	375	21
tr|A0A0E0H1P0|A0A0E0H1P0_ORYNI	58.66	6120	5166	0.84	91	106	15
tr|A0A0E0H1P0|A0A0E0H1P0_ORYNI	44.62	154	573.624	3.72	114	131	17
tr|A0A0E0H1P0|A0A0E0H1P0_ORYNI	41.47	5145	4244	0.82	390	399	9
tr|A0A0E0H1P0|A0A0E0H1P0_ORYNI	39.99	7210	6639	0.92	376	386	10
tr|A0A0E0H1P0|A0A0E0H1P0_ORYNI	36.12	225.5	277.638	1.23	354	375	21
tr|A0A0E0H1P0|A0A0E0H1P0_ORYNI	33.08	394.5	86.43	0.22	89	100	11
tr|A0A0E0H1P0|A0A0E0H1P0_ORYNI	32.75	211	365.033	1.73	390	401	11
tr|A0A0E0H1P0|A0A0E0H1P0_ORYNI	31.67	685	378.553	0.55	390	400	10
tr|A0A0E0H1P0|A0A0E0H1P0_ORYNI	26.52	1462	613.7	0.42	365	375	10
tr|A0A0E0H1P0|A0A0E0H1P0_ORYNI	24.58	480.5	520.993	1.08	376	390	14
tr|A0A0E0H1P0|A0A0E0H1P0_ORYNI	24.5	159.5	211.97	1.33	354	375	21
tr|Q7X8A1|Q7X8A1_ORYSJ	123.19	15020	12100	0.81	114	138	24
tr|Q7X8A1|Q7X8A1_ORYSJ	103.12	61240	55460	0.91	89	106	17
tr|Q7X8A1|Q7X8A1_ORYSJ	101.77	28470	25160	0.88	338	353	15
tr|Q7X8A1|Q7X8A1_ORYSJ	99.66	51430	42050	0.82	376	389	13
tr|Q7X8A1|Q7X8A1_ORYSJ	96.52	94880	70520	0.74	390	402	12
tr|Q7X8A1|Q7X8A1_ORYSJ	72.01	1076	925.137	0.86	354	375	21
tr|Q7X8A1|Q7X8A1_ORYSJ	60.74	2847	3069	1.08	114	126	12
tr|Q7X8A1|Q7X8A1_ORYSJ	60.03	372.5	81.601	0.22	354	375	21
tr|Q7X8A1|Q7X8A1_ORYSJ	58.66	6120	5166	0.84	91	106	15
tr|Q7X8A1|Q7X8A1_ORYSJ	44.62	154	573.624	3.72	114	131	17
tr|Q7X8A1|Q7X8A1_ORYSJ	41.47	5145	4244	0.82	390	399	9
tr|Q7X8A1|Q7X8A1_ORYSJ	39.99	7210	6639	0.92	376	386	10
tr|Q7X8A1|Q7X8A1_ORYSJ	36.12	225.5	277.638	1.23	354	375	21
tr|Q7X8A1|Q7X8A1_ORYSJ	33.08	394.5	86.43	0.22	89	100	11
tr|Q7X8A1|Q7X8A1_ORYSJ	32.75	211	365.033	1.73	390	401	11
tr|Q7X8A1|Q7X8A1_ORYSJ	31.67	685	378.553	0.55	390	400	10
tr|Q7X8A1|Q7X8A1_ORYSJ	26.52	1462	613.7	0.42	365	375	10
tr|Q7X8A1|Q7X8A1_ORYSJ	24.58	480.5	520.993	1.08	376	390	14
tr|Q7X8A1|Q7X8A1_ORYSJ	24.5	159.5	211.97	1.33	354	375	21
tr|Q01IJ6|Q01IJ6_ORYSA	123.19	15020	12100	0.81	114	138	24
tr|Q01IJ6|Q01IJ6_ORYSA	103.12	61240	55460	0.91	89	106	17
tr|Q01IJ6|Q01IJ6_ORYSA	101.77	28470	25160	0.88	338	353	15
tr|Q01IJ6|Q01IJ6_ORYSA	99.66	51430	42050	0.82	376	389	13
tr|Q01IJ6|Q01IJ6_ORYSA	96.52	94880	70520	0.74	390	402	12
tr|Q01IJ6|Q01IJ6_ORYSA	72.01	1076	925.137	0.86	354	375	21
tr|Q01IJ6|Q01IJ6_ORYSA	60.74	2847	3069	1.08	114	126	12
tr|Q01IJ6|Q01IJ6_ORYSA	60.03	372.5	81.601	0.22	354	375	21
tr|Q01IJ6|Q01IJ6_ORYSA	58.66	6120	5166	0.84	91	106	15
tr|Q01IJ6|Q01IJ6_ORYSA	44.62	154	573.624	3.72	114	131	17
tr|Q01IJ6|Q01IJ6_ORYSA	41.47	5145	4244	0.82	390	399	9
tr|Q01IJ6|Q01IJ6_ORYSA	39.99	7210	6639	0.92	376	386	10
tr|Q01IJ6|Q01IJ6_ORYSA	36.12	225.5	277.638	1.23	354	375	21
tr|Q01IJ6|Q01IJ6_ORYSA	33.08	394.5	86.43	0.22	89	100	11
tr|Q01IJ6|Q01IJ6_ORYSA	32.75	211	365.033	1.73	390	401	11
tr|Q01IJ6|Q01IJ6_ORYSA	31.67	685	378.553	0.55	390	400	10
tr|Q01IJ6|Q01IJ6_ORYSA	26.52	1462	613.7	0.42	365	375	10
tr|Q01IJ6|Q01IJ6_ORYSA	24.58	480.5	520.993	1.08	376	390	14
tr|Q01IJ6|Q01IJ6_ORYSA	24.5	159.5	211.97	1.33	354	375	21
tr|Q8S7T5|Q8S7T5_ORYSJ	39.55	138	1042	7.55	467	480	13
tr|Q75HQ5|Q75HQ5_ORYSJ	46.22	3831	4040	1.05	184	199	15
tr|A0A0E0IYS5|A0A0E0IYS5_ORYNI	114.63	43920	33150	0.75	201	228	27
tr|A0A0E0IYS5|A0A0E0IYS5_ORYNI	103.48	27710	23040	0.83	140	162	22
tr|A0A0E0IYS5|A0A0E0IYS5_ORYNI	90.96	120800	111000	0.92	178	192	14
tr|A0A0E0IYS5|A0A0E0IYS5_ORYNI	81.61	5977	6470	1.08	145	162	17
tr|A0A0E0IYS5|A0A0E0IYS5_ORYNI	77.62	2965	2898	0.98	209	228	19
tr|A0A0E0IYS5|A0A0E0IYS5_ORYNI	65.95	1365	517.613	0.38	201	217	16
tr|A0A0E0IYS5|A0A0E0IYS5_ORYNI	64.7	1322	815.531	0.62	178	200	22
tr|A0A0E0IYS5|A0A0E0IYS5_ORYNI	60.73	22970	20670	0.9	218	228	10
tr|A0A0E0IYS5|A0A0E0IYS5_ORYNI	58.64	1446	1324	0.92	178	189	11
tr|A0A0E0IYS5|A0A0E0IYS5_ORYNI	39.62	360	823.739	2.29	204	228	24
tr|A0A0E0IYS5|A0A0E0IYS5_ORYNI	37.78	10940	8598	0.79	236	243	7
tr|A0A0E0IYS5|A0A0E0IYS5_ORYNI	33.87	6224	5615	0.9	185	192	7
tr|A2ZBX1|A2ZBX1_ORYSI	114.63	43920	33150	0.75	201	228	27
tr|A2ZBX1|A2ZBX1_ORYSI	103.48	27710	23040	0.83	140	162	22
tr|A2ZBX1|A2ZBX1_ORYSI	90.96	120800	111000	0.92	178	192	14
tr|A2ZBX1|A2ZBX1_ORYSI	81.61	5977	6470	1.08	145	162	17
tr|A2ZBX1|A2ZBX1_ORYSI	77.62	2965	2898	0.98	209	228	19
tr|A2ZBX1|A2ZBX1_ORYSI	65.95	1365	517.613	0.38	201	217	16
tr|A2ZBX1|A2ZBX1_ORYSI	64.7	1322	815.531	0.62	178	200	22
tr|A2ZBX1|A2ZBX1_ORYSI	60.73	22970	20670	0.9	218	228	10
tr|A2ZBX1|A2ZBX1_ORYSI	58.64	1446	1324	0.92	178	189	11
tr|A2ZBX1|A2ZBX1_ORYSI	39.62	360	823.739	2.29	204	228	24
tr|A2ZBX1|A2ZBX1_ORYSI	37.78	10940	8598	0.79	236	243	7
tr|A2ZBX1|A2ZBX1_ORYSI	33.87	6224	5615	0.9	185	192	7
Q40677|ALFP_ORYSJ	114.63	43920	33150	0.75	201	228	27
Q40677|ALFP_ORYSJ	103.48	27710	23040	0.83	140	162	22
Q40677|ALFP_ORYSJ	90.96	120800	111000	0.92	178	192	14
Q40677|ALFP_ORYSJ	81.61	5977	6470	1.08	145	162	17
Q40677|ALFP_ORYSJ	77.62	2965	2898	0.98	209	228	19
Q40677|ALFP_ORYSJ	65.95	1365	517.613	0.38	201	217	16
Q40677|ALFP_ORYSJ	64.7	1322	815.531	0.62	178	200	22
Q40677|ALFP_ORYSJ	60.73	22970	20670	0.9	218	228	10
Q40677|ALFP_ORYSJ	58.64	1446	1324	0.92	178	189	11
Q40677|ALFP_ORYSJ	39.62	360	823.739	2.29	204	228	24
Q40677|ALFP_ORYSJ	37.78	10940	8598	0.79	236	243	7
Q40677|ALFP_ORYSJ	33.87	6224	5615	0.9	185	192	7
tr|A0A1L2JN36|A0A1L2JN36_ORYSA	114.63	43920	33150	0.75	201	228	27
tr|A0A1L2JN36|A0A1L2JN36_ORYSA	103.48	27710	23040	0.83	140	162	22
tr|A0A1L2JN36|A0A1L2JN36_ORYSA	90.96	120800	111000	0.92	178	192	14
tr|A0A1L2JN36|A0A1L2JN36_ORYSA	81.61	5977	6470	1.08	145	162	17
tr|A0A1L2JN36|A0A1L2JN36_ORYSA	77.62	2965	2898	0.98	209	228	19
tr|A0A1L2JN36|A0A1L2JN36_ORYSA	65.95	1365	517.613	0.38	201	217	16
tr|A0A1L2JN36|A0A1L2JN36_ORYSA	64.7	1322	815.531	0.62	178	200	22
tr|A0A1L2JN36|A0A1L2JN36_ORYSA	60.73	22970	20670	0.9	218	228	10
tr|A0A1L2JN36|A0A1L2JN36_ORYSA	58.64	1446	1324	0.92	178	189	11
tr|A0A1L2JN36|A0A1L2JN36_ORYSA	39.62	360	823.739	2.29	204	228	24
tr|A0A1L2JN36|A0A1L2JN36_ORYSA	37.78	10940	8598	0.79	236	243	7
tr|A0A1L2JN36|A0A1L2JN36_ORYSA	33.87	6224	5615	0.9	185	192	7
tr|A0A0E0FNU4|A0A0E0FNU4_ORYNI	102.42	12240	8744	0.71	980	994	14
tr|A0A0E0FNU4|A0A0E0FNU4_ORYNI	100.61	16210	12970	0.8	950	966	16
tr|A0A0E0FNU4|A0A0E0FNU4_ORYNI	96.23	7280	5961	0.82	670	693	23
tr|A0A0E0FNU4|A0A0E0FNU4_ORYNI	94.7	15020	16470	1.1	887	901	14
tr|A0A0E0FNU4|A0A0E0FNU4_ORYNI	93.44	4353	2465	0.57	1077	1093	16
tr|A0A0E0FNU4|A0A0E0FNU4_ORYNI	92.31	15630	12630	0.81	806	824	18
tr|A0A0E0FNU4|A0A0E0FNU4_ORYNI	85.49	3559	3038	0.85	1077	1089	12
tr|A0A0E0FNU4|A0A0E0FNU4_ORYNI	80.61	12840	12760	0.99	923	934	11
tr|A0A0E0FNU4|A0A0E0FNU4_ORYNI	79.43	20060	17190	0.86	836	848	12
tr|A0A0E0FNU4|A0A0E0FNU4_ORYNI	77.14	11390	12180	1.07	697	707	10
tr|A0A0E0FNU4|A0A0E0FNU4_ORYNI	76.99	4682	4999	1.07	910	922	12
tr|A0A0E0FNU4|A0A0E0FNU4_ORYNI	76.53	14460	14800	1.02	860	870	10
tr|A0A0E0FNU4|A0A0E0FNU4_ORYNI	75.67	19420	16990	0.87	709	719	10
tr|A0A0E0FNU4|A0A0E0FNU4_ORYNI	71.37	4211	3570	0.85	1049	1065	16
tr|A0A0E0FNU4|A0A0E0FNU4_ORYNI	70.4	75370	62040	0.82	1055	1065	10
tr|A0A0E0FNU4|A0A0E0FNU4_ORYNI	70.28	17440	15730	0.9	1101	1111	10
tr|A0A0E0FNU4|A0A0E0FNU4_ORYNI	69.27	2248	3871	1.72	938	948	10
tr|A0A0E0FNU4|A0A0E0FNU4_ORYNI	68.77	8013	8648	1.08	745	753	8
tr|A0A0E0FNU4|A0A0E0FNU4_ORYNI	67.77	1934	1428	0.74	697	707	10
tr|A0A0E0FNU4|A0A0E0FNU4_ORYNI	67.32	36650	33600	0.92	814	824	10
tr|A0A0E0FNU4|A0A0E0FNU4_ORYNI	64.6	19070	16870	0.88	806	813	7
tr|A0A0E0FNU4|A0A0E0FNU4_ORYNI	64.09	1843	1368	0.74	709	725	16
tr|A0A0E0FNU4|A0A0E0FNU4_ORYNI	63.69	2980	2928	0.98	938	948	10
tr|A0A0E0FNU4|A0A0E0FNU4_ORYNI	63.48	3910	3897	1	708	719	11
tr|A0A0E0FNU4|A0A0E0FNU4_ORYNI	63.14	3489	3238	0.93	938	948	10
tr|A0A0E0FNU4|A0A0E0FNU4_ORYNI	62	24670	21510	0.87	877	885	8
tr|A0A0E0FNU4|A0A0E0FNU4_ORYNI	60.65	2174	2205	1.01	938	949	11
tr|A0A0E0FNU4|A0A0E0FNU4_ORYNI	58.89	3372	1918	0.57	849	859	10
tr|A0A0E0FNU4|A0A0E0FNU4_ORYNI	58.59	1032	603.56	0.58	938	948	10
tr|A0A0E0FNU4|A0A0E0FNU4_ORYNI	58.48	2868	2111	0.74	995	1010	15
tr|A0A0E0FNU4|A0A0E0FNU4_ORYNI	58.13	296.5	0	0	949	966	17
tr|A0A0E0FNU4|A0A0E0FNU4_ORYNI	56.93	19350	17670	0.91	852	859	7
tr|A0A0E0FNU4|A0A0E0FNU4_ORYNI	55	859	717.513	0.84	935	948	13
tr|A0A0E0FNU4|A0A0E0FNU4_ORYNI	53.57	5113	4156	0.81	877	886	9
tr|A0A0E0FNU4|A0A0E0FNU4_ORYNI	52.49	1858	2046	1.1	805	813	8
tr|A0A0E0FNU4|A0A0E0FNU4_ORYNI	52.36	12640	16490	1.3	1047	1054	7
tr|A0A0E0FNU4|A0A0E0FNU4_ORYNI	52.36	1084	658.122	0.61	950	967	17
tr|A0A0E0FNU4|A0A0E0FNU4_ORYNI	52.3	2490	2435	0.98	697	707	10
tr|A0A0E0FNU4|A0A0E0FNU4_ORYNI	51.89	2753	3535	1.28	793	804	11
tr|A0A0E0FNU4|A0A0E0FNU4_ORYNI	50.06	39860	34200	0.86	969	976	7
tr|A0A0E0FNU4|A0A0E0FNU4_ORYNI	49.12	6692	6282	0.94	806	813	7
tr|A0A0E0FNU4|A0A0E0FNU4_ORYNI	45.93	39410	38380	0.97	728	735	7
tr|A0A0E0FNU4|A0A0E0FNU4_ORYNI	43.57	3136	3779	1.2	860	870	10
tr|A0A0E0FNU4|A0A0E0FNU4_ORYNI	37.72	1225	1270	1.04	938	949	11
tr|A0A0E0FNU4|A0A0E0FNU4_ORYNI	37.27	2900	3200	1.1	1066	1072	6
tr|A0A0E0FNU4|A0A0E0FNU4_ORYNI	36.64	2786	2994	1.07	968	976	8
tr|A0A0E0FNU4|A0A0E0FNU4_ORYNI	36.25	150.5	165.617	1.1	1077	1087	10
tr|A0A0E0FNU4|A0A0E0FNU4_ORYNI	34.21	780.5	824.222	1.06	902	909	7
tr|A0A0E0FNU4|A0A0E0FNU4_ORYNI	33.99	385.5	117.332	0.3	902	922	20
tr|A0A0E0FNU4|A0A0E0FNU4_ORYNI	33.7	971.5	874.438	0.9	793	805	12
tr|A0A0E0FNU4|A0A0E0FNU4_ORYNI	31.73	388.5	573.141	1.48	754	769	15
tr|A0A0E0FNU4|A0A0E0FNU4_ORYNI	31.3	1991	1907	0.96	728	734	6
tr|A0A0E0FNU4|A0A0E0FNU4_ORYNI	30.66	1115	1243	1.11	998	1010	12
tr|A0A0E0FNU4|A0A0E0FNU4_ORYNI	30.51	544	738.758	1.36	836	846	10
tr|A0A0E0FNU4|A0A0E0FNU4_ORYNI	30.35	1220	968.111	0.79	1055	1067	12
tr|A0A0E0FNU4|A0A0E0FNU4_ORYNI	27.57	659	502.162	0.76	995	1010	15
tr|A0A0E0FNU4|A0A0E0FNU4_ORYNI	27.07	2582	2187	0.85	1047	1054	7
tr|A0A0E0FNU4|A0A0E0FNU4_ORYNI	26.21	242.5	126.023	0.52	727	735	8
tr|A0A0E0FNU4|A0A0E0FNU4_ORYNI	24.88	728.5	756.623	1.04	697	708	11
tr|A0A0E0FNU4|A0A0E0FNU4_ORYNI	22.44	1826	2137	1.17	969	975	6
tr|Q2QP54|Q2QP54_ORYSJ	102.42	12240	8744	0.71	980	994	14
tr|Q2QP54|Q2QP54_ORYSJ	100.61	16210	12970	0.8	950	966	16
tr|Q2QP54|Q2QP54_ORYSJ	96.23	7280	5961	0.82	670	693	23
tr|Q2QP54|Q2QP54_ORYSJ	94.7	15020	16470	1.1	887	901	14
tr|Q2QP54|Q2QP54_ORYSJ	93.44	4353	2465	0.57	1077	1093	16
tr|Q2QP54|Q2QP54_ORYSJ	92.31	15630	12630	0.81	806	824	18
tr|Q2QP54|Q2QP54_ORYSJ	85.49	3559	3038	0.85	1077	1089	12
tr|Q2QP54|Q2QP54_ORYSJ	80.61	12840	12760	0.99	923	934	11
tr|Q2QP54|Q2QP54_ORYSJ	79.43	20060	17190	0.86	836	848	12
tr|Q2QP54|Q2QP54_ORYSJ	77.14	11390	12180	1.07	697	707	10
tr|Q2QP54|Q2QP54_ORYSJ	76.99	4682	4999	1.07	910	922	12
tr|Q2QP54|Q2QP54_ORYSJ	76.53	14460	14800	1.02	860	870	10
tr|Q2QP54|Q2QP54_ORYSJ	75.67	19420	16990	0.87	709	719	10
tr|Q2QP54|Q2QP54_ORYSJ	71.37	4211	3570	0.85	1049	1065	16
tr|Q2QP54|Q2QP54_ORYSJ	70.4	75370	62040	0.82	1055	1065	10
tr|Q2QP54|Q2QP54_ORYSJ	70.28	17440	15730	0.9	1101	1111	10
tr|Q2QP54|Q2QP54_ORYSJ	69.27	2248	3871	1.72	938	948	10
tr|Q2QP54|Q2QP54_ORYSJ	68.77	8013	8648	1.08	745	753	8
tr|Q2QP54|Q2QP54_ORYSJ	67.77	1934	1428	0.74	697	707	10
tr|Q2QP54|Q2QP54_ORYSJ	67.32	36650	33600	0.92	814	824	10
tr|Q2QP54|Q2QP54_ORYSJ	64.6	19070	16870	0.88	806	813	7
tr|Q2QP54|Q2QP54_ORYSJ	64.09	1843	1368	0.74	709	725	16
tr|Q2QP54|Q2QP54_ORYSJ	63.69	2980	2928	0.98	938	948	10
tr|Q2QP54|Q2QP54_ORYSJ	63.48	3910	3897	1	708	719	11
tr|Q2QP54|Q2QP54_ORYSJ	63.14	3489	3238	0.93	938	948	10
tr|Q2QP54|Q2QP54_ORYSJ	62	24670	21510	0.87	877	885	8
tr|Q2QP54|Q2QP54_ORYSJ	60.65	2174	2205	1.01	938	949	11
tr|Q2QP54|Q2QP54_ORYSJ	58.89	3372	1918	0.57	849	859	10
tr|Q2QP54|Q2QP54_ORYSJ	58.59	1032	603.56	0.58	938	948	10
tr|Q2QP54|Q2QP54_ORYSJ	58.48	2868	2111	0.74	995	1010	15
tr|Q2QP54|Q2QP54_ORYSJ	58.13	296.5	0	0	949	966	17
tr|Q2QP54|Q2QP54_ORYSJ	56.93	19350	17670	0.91	852	859	7
tr|Q2QP54|Q2QP54_ORYSJ	55	859	717.513	0.84	935	948	13
tr|Q2QP54|Q2QP54_ORYSJ	53.57	5113	4156	0.81	877	886	9
tr|Q2QP54|Q2QP54_ORYSJ	52.49	1858	2046	1.1	805	813	8
tr|Q2QP54|Q2QP54_ORYSJ	52.36	12640	16490	1.3	1047	1054	7
tr|Q2QP54|Q2QP54_ORYSJ	52.36	1084	658.122	0.61	950	967	17
tr|Q2QP54|Q2QP54_ORYSJ	52.3	2490	2435	0.98	697	707	10
tr|Q2QP54|Q2QP54_ORYSJ	51.89	2753	3535	1.28	793	804	11
tr|Q2QP54|Q2QP54_ORYSJ	50.06	39860	34200	0.86	969	976	7
tr|Q2QP54|Q2QP54_ORYSJ	49.12	6692	6282	0.94	806	813	7
tr|Q2QP54|Q2QP54_ORYSJ	45.93	39410	38380	0.97	728	735	7
tr|Q2QP54|Q2QP54_ORYSJ	43.57	3136	3779	1.2	860	870	10
tr|Q2QP54|Q2QP54_ORYSJ	37.72	1225	1270	1.04	938	949	11
tr|Q2QP54|Q2QP54_ORYSJ	37.27	2900	3200	1.1	1066	1072	6
tr|Q2QP54|Q2QP54_ORYSJ	36.64	2786	2994	1.07	968	976	8
tr|Q2QP54|Q2QP54_ORYSJ	36.25	150.5	165.617	1.1	1077	1087	10
tr|Q2QP54|Q2QP54_ORYSJ	34.21	780.5	824.222	1.06	902	909	7
tr|Q2QP54|Q2QP54_ORYSJ	33.99	385.5	117.332	0.3	902	922	20
tr|Q2QP54|Q2QP54_ORYSJ	33.7	971.5	874.438	0.9	793	805	12
tr|Q2QP54|Q2QP54_ORYSJ	31.73	388.5	573.141	1.48	754	769	15
tr|Q2QP54|Q2QP54_ORYSJ	31.3	1991	1907	0.96	728	734	6
tr|Q2QP54|Q2QP54_ORYSJ	30.66	1115	1243	1.11	998	1010	12
tr|Q2QP54|Q2QP54_ORYSJ	30.51	544	738.758	1.36	836	846	10
tr|Q2QP54|Q2QP54_ORYSJ	30.35	1220	968.111	0.79	1055	1067	12
tr|Q2QP54|Q2QP54_ORYSJ	27.57	659	502.162	0.76	995	1010	15
tr|Q2QP54|Q2QP54_ORYSJ	27.07	2582	2187	0.85	1047	1054	7
tr|Q2QP54|Q2QP54_ORYSJ	26.21	242.5	126.023	0.52	727	735	8
tr|Q2QP54|Q2QP54_ORYSJ	24.88	728.5	756.623	1.04	697	708	11
tr|Q2QP54|Q2QP54_ORYSJ	22.44	1826	2137	1.17	969	975	6
tr|A2ZLC1|A2ZLC1_ORYSI	102.42	12240	8744	0.71	980	994	14
tr|A2ZLC1|A2ZLC1_ORYSI	100.61	16210	12970	0.8	950	966	16
tr|A2ZLC1|A2ZLC1_ORYSI	96.23	7280	5961	0.82	670	693	23
tr|A2ZLC1|A2ZLC1_ORYSI	94.7	15020	16470	1.1	887	901	14
tr|A2ZLC1|A2ZLC1_ORYSI	93.44	4353	2465	0.57	1077	1093	16
tr|A2ZLC1|A2ZLC1_ORYSI	92.31	15630	12630	0.81	806	824	18
tr|A2ZLC1|A2ZLC1_ORYSI	85.49	3559	3038	0.85	1077	1089	12
tr|A2ZLC1|A2ZLC1_ORYSI	80.61	12840	12760	0.99	923	934	11
tr|A2ZLC1|A2ZLC1_ORYSI	79.43	20060	17190	0.86	836	848	12
tr|A2ZLC1|A2ZLC1_ORYSI	77.14	11390	12180	1.07	697	707	10
tr|A2ZLC1|A2ZLC1_ORYSI	76.99	4682	4999	1.07	910	922	12
tr|A2ZLC1|A2ZLC1_ORYSI	76.53	14460	14800	1.02	860	870	10
tr|A2ZLC1|A2ZLC1_ORYSI	75.67	19420	16990	0.87	709	719	10
tr|A2ZLC1|A2ZLC1_ORYSI	71.37	4211	3570	0.85	1049	1065	16
tr|A2ZLC1|A2ZLC1_ORYSI	70.4	75370	62040	0.82	1055	1065	10
tr|A2ZLC1|A2ZLC1_ORYSI	70.28	17440	15730	0.9	1101	1111	10
tr|A2ZLC1|A2ZLC1_ORYSI	69.27	2248	3871	1.72	938	948	10
tr|A2ZLC1|A2ZLC1_ORYSI	68.77	8013	8648	1.08	745	753	8
tr|A2ZLC1|A2ZLC1_ORYSI	67.77	1934	1428	0.74	697	707	10
tr|A2ZLC1|A2ZLC1_ORYSI	67.32	36650	33600	0.92	814	824	10
tr|A2ZLC1|A2ZLC1_ORYSI	64.6	19070	16870	0.88	806	813	7
tr|A2ZLC1|A2ZLC1_ORYSI	64.09	1843	1368	0.74	709	725	16
tr|A2ZLC1|A2ZLC1_ORYSI	63.69	2980	2928	0.98	938	948	10
tr|A2ZLC1|A2ZLC1_ORYSI	63.48	3910	3897	1	708	719	11
tr|A2ZLC1|A2ZLC1_ORYSI	63.14	3489	3238	0.93	938	948	10
tr|A2ZLC1|A2ZLC1_ORYSI	62	24670	21510	0.87	877	885	8
tr|A2ZLC1|A2ZLC1_ORYSI	60.65	2174	2205	1.01	938	949	11
tr|A2ZLC1|A2ZLC1_ORYSI	58.89	3372	1918	0.57	849	859	10
tr|A2ZLC1|A2ZLC1_ORYSI	58.59	1032	603.56	0.58	938	948	10
tr|A2ZLC1|A2ZLC1_ORYSI	58.48	2868	2111	0.74	995	1010	15
tr|A2ZLC1|A2ZLC1_ORYSI	58.13	296.5	0	0	949	966	17
tr|A2ZLC1|A2ZLC1_ORYSI	56.93	19350	17670	0.91	852	859	7
tr|A2ZLC1|A2ZLC1_ORYSI	55	859	717.513	0.84	935	948	13
tr|A2ZLC1|A2ZLC1_ORYSI	53.57	5113	4156	0.81	877	886	9
tr|A2ZLC1|A2ZLC1_ORYSI	52.49	1858	2046	1.1	805	813	8
tr|A2ZLC1|A2ZLC1_ORYSI	52.36	12640	16490	1.3	1047	1054	7
tr|A2ZLC1|A2ZLC1_ORYSI	52.36	1084	658.122	0.61	950	967	17
tr|A2ZLC1|A2ZLC1_ORYSI	52.3	2490	2435	0.98	697	707	10
tr|A2ZLC1|A2ZLC1_ORYSI	51.89	2753	3535	1.28	793	804	11
tr|A2ZLC1|A2ZLC1_ORYSI	50.06	39860	34200	0.86	969	976	7
tr|A2ZLC1|A2ZLC1_ORYSI	49.12	6692	6282	0.94	806	813	7
tr|A2ZLC1|A2ZLC1_ORYSI	45.93	39410	38380	0.97	728	735	7
tr|A2ZLC1|A2ZLC1_ORYSI	43.57	3136	3779	1.2	860	870	10
tr|A2ZLC1|A2ZLC1_ORYSI	37.72	1225	1270	1.04	938	949	11
tr|A2ZLC1|A2ZLC1_ORYSI	37.27	2900	3200	1.1	1066	1072	6
tr|A2ZLC1|A2ZLC1_ORYSI	36.64	2786	2994	1.07	968	976	8
tr|A2ZLC1|A2ZLC1_ORYSI	36.25	150.5	165.617	1.1	1077	1087	10
tr|A2ZLC1|A2ZLC1_ORYSI	34.21	780.5	824.222	1.06	902	909	7
tr|A2ZLC1|A2ZLC1_ORYSI	33.99	385.5	117.332	0.3	902	922	20
tr|A2ZLC1|A2ZLC1_ORYSI	33.7	971.5	874.438	0.9	793	805	12
tr|A2ZLC1|A2ZLC1_ORYSI	31.73	388.5	573.141	1.48	754	769	15
tr|A2ZLC1|A2ZLC1_ORYSI	31.3	1991	1907	0.96	728	734	6
tr|A2ZLC1|A2ZLC1_ORYSI	30.66	1115	1243	1.11	998	1010	12
tr|A2ZLC1|A2ZLC1_ORYSI	30.51	544	738.758	1.36	836	846	10
tr|A2ZLC1|A2ZLC1_ORYSI	30.35	1220	968.111	0.79	1055	1067	12
tr|A2ZLC1|A2ZLC1_ORYSI	27.57	659	502.162	0.76	995	1010	15
tr|A2ZLC1|A2ZLC1_ORYSI	27.07	2582	2187	0.85	1047	1054	7
tr|A2ZLC1|A2ZLC1_ORYSI	26.21	242.5	126.023	0.52	727	735	8
tr|A2ZLC1|A2ZLC1_ORYSI	24.88	728.5	756.623	1.04	697	708	11
tr|A2ZLC1|A2ZLC1_ORYSI	22.44	1826	2137	1.17	969	975	6
tr|A0A0E0IUD7|A0A0E0IUD7_ORYNI	109.54	3133	3940	1.26	74	94	20
tr|A0A0E0IUD7|A0A0E0IUD7_ORYNI	97.6	90120	68920	0.76	57	73	16
tr|A0A0E0IUD7|A0A0E0IUD7_ORYNI	95.02	29850	25000	0.84	258	271	13
tr|A0A0E0IUD7|A0A0E0IUD7_ORYNI	69.1	6772	6887	1.02	258	271	13
tr|A0A0E0IUD7|A0A0E0IUD7_ORYNI	49.93	2940	2546	0.87	59	73	14
tr|A0A0E0IUD7|A0A0E0IUD7_ORYNI	46.11	34.5	572.175	16.58	74	89	15
tr|A0A0E0IUD7|A0A0E0IUD7_ORYNI	24.54	2134	1712	0.8	263	271	8
tr|Q2QU06|Q2QU06_ORYSJ	103.52	20130	18360	0.91	483	505	22
tr|Q2QU06|Q2QU06_ORYSJ	95.31	18080	15610	0.86	339	356	17
tr|Q2QU06|Q2QU06_ORYSJ	92.7	50300	45040	0.9	94	110	16
tr|Q2QU06|Q2QU06_ORYSJ	90.16	16170	14000	0.87	322	338	16
tr|Q2QU06|Q2QU06_ORYSJ	89.28	6083	5283	0.87	280	301	21
tr|Q2QU06|Q2QU06_ORYSJ	87.8	42610	41240	0.97	387	399	12
tr|Q2QU06|Q2QU06_ORYSJ	87.16	505.5	146.303	0.29	321	338	17
tr|Q2QU06|Q2QU06_ORYSJ	85.36	11220	10450	0.93	94	110	16
tr|Q2QU06|Q2QU06_ORYSJ	84.36	2522	1334	0.53	262	274	12
tr|Q2QU06|Q2QU06_ORYSJ	82.93	20690	22270	1.08	233	245	12
tr|Q2QU06|Q2QU06_ORYSJ	81.4	20450	18410	0.9	73	83	10
tr|Q2QU06|Q2QU06_ORYSJ	80.52	1481	894.235	0.6	181	203	22
tr|Q2QU06|Q2QU06_ORYSJ	80.06	4880	3859	0.79	566	578	12
tr|Q2QU06|Q2QU06_ORYSJ	78.6	6316	6612	1.05	158	169	11
tr|Q2QU06|Q2QU06_ORYSJ	77.54	10910	10530	0.96	158	168	10
tr|Q2QU06|Q2QU06_ORYSJ	73.87	172800	185100	1.07	466	474	8
tr|Q2QU06|Q2QU06_ORYSJ	72.42	4306	3902	0.91	522	535	13
tr|Q2QU06|Q2QU06_ORYSJ	71.04	3544	2952	0.83	387	403	16
tr|Q2QU06|Q2QU06_ORYSJ	70.8	19610	19910	1.02	59	70	11
tr|Q2QU06|Q2QU06_ORYSJ	69.28	4288	4628	1.08	483	493	10
tr|Q2QU06|Q2QU06_ORYSJ	67.04	241.5	55.528	0.23	357	374	17
tr|Q2QU06|Q2QU06_ORYSJ	66.43	26080	24910	0.96	246	254	8
tr|Q2QU06|Q2QU06_ORYSJ	63.59	28490	18620	0.65	74	83	9
tr|Q2QU06|Q2QU06_ORYSJ	62.73	743	708.821	0.95	357	380	23
tr|Q2QU06|Q2QU06_ORYSJ	62.23	1140	640.74	0.56	358	380	22
tr|Q2QU06|Q2QU06_ORYSJ	61.99	29220	32330	1.11	50	58	8
tr|Q2QU06|Q2QU06_ORYSJ	54.94	805	802.494	1	362	380	18
tr|Q2QU06|Q2QU06_ORYSJ	54.61	419	386.279	0.92	508	521	13
tr|Q2QU06|Q2QU06_ORYSJ	52.23	679.5	349.099	0.51	181	203	22
tr|Q2QU06|Q2QU06_ORYSJ	49.57	361	557.207	1.54	386	399	13
tr|Q2QU06|Q2QU06_ORYSJ	48.91	997	1241	1.24	466	473	7
tr|Q2QU06|Q2QU06_ORYSJ	44.93	6081	9248	1.52	41	47	6
tr|Q2QU06|Q2QU06_ORYSJ	43.96	2345	2239	0.95	556	565	9
tr|Q2QU06|Q2QU06_ORYSJ	43.86	34680	40890	1.18	313	319	6
tr|Q2QU06|Q2QU06_ORYSJ	43.66	958.5	661.985	0.69	551	565	14
tr|Q2QU06|Q2QU06_ORYSJ	41.47	477.5	123.126	0.26	483	494	11
tr|Q2QU06|Q2QU06_ORYSJ	37.68	1730	884.095	0.51	455	465	10
tr|Q2QU06|Q2QU06_ORYSJ	36.96	512.5	504.576	0.98	566	577	11
tr|Q2QU06|Q2QU06_ORYSJ	34.73	12090	11080	0.92	255	261	6
tr|Q2QU06|Q2QU06_ORYSJ	32.93	1395	1128	0.81	38	47	9
tr|Q2QU06|Q2QU06_ORYSJ	30.34	1234	797.182	0.65	161	169	8
tr|Q2QU06|Q2QU06_ORYSJ	28.41	473.5	398.35	0.84	494	505	11
tr|Q2QU06|Q2QU06_ORYSJ	27.6	289.5	215.833	0.75	181	196	15
tr|Q2QU06|Q2QU06_ORYSJ	27.02	1358	673.573	0.5	393	399	6
tr|Q2QU06|Q2QU06_ORYSJ	24.93	49.5	308.54	6.23	436	465	29
tr|Q2QU06|Q2QU06_ORYSJ	22.75	343.5	1219	3.55	62	70	8
tr|A2ZJH7|A2ZJH7_ORYSI	103.52	20130	18360	0.91	483	505	22
tr|A2ZJH7|A2ZJH7_ORYSI	95.31	18080	15610	0.86	339	356	17
tr|A2ZJH7|A2ZJH7_ORYSI	92.7	50300	45040	0.9	94	110	16
tr|A2ZJH7|A2ZJH7_ORYSI	90.16	16170	14000	0.87	322	338	16
tr|A2ZJH7|A2ZJH7_ORYSI	89.28	6083	5283	0.87	280	301	21
tr|A2ZJH7|A2ZJH7_ORYSI	87.8	42610	41240	0.97	387	399	12
tr|A2ZJH7|A2ZJH7_ORYSI	87.16	505.5	146.303	0.29	321	338	17
tr|A2ZJH7|A2ZJH7_ORYSI	85.36	11220	10450	0.93	94	110	16
tr|A2ZJH7|A2ZJH7_ORYSI	84.36	2522	1334	0.53	262	274	12
tr|A2ZJH7|A2ZJH7_ORYSI	82.93	20690	22270	1.08	233	245	12
tr|A2ZJH7|A2ZJH7_ORYSI	81.4	20450	18410	0.9	73	83	10
tr|A2ZJH7|A2ZJH7_ORYSI	80.52	1481	894.235	0.6	181	203	22
tr|A2ZJH7|A2ZJH7_ORYSI	80.06	4880	3859	0.79	566	578	12
tr|A2ZJH7|A2ZJH7_ORYSI	78.6	6316	6612	1.05	158	169	11
tr|A2ZJH7|A2ZJH7_ORYSI	77.54	10910	10530	0.96	158	168	10
tr|A2ZJH7|A2ZJH7_ORYSI	73.87	172800	185100	1.07	466	474	8
tr|A2ZJH7|A2ZJH7_ORYSI	72.42	4306	3902	0.91	522	535	13
tr|A2ZJH7|A2ZJH7_ORYSI	71.04	3544	2952	0.83	387	403	16
tr|A2ZJH7|A2ZJH7_ORYSI	70.8	19610	19910	1.02	59	70	11
tr|A2ZJH7|A2ZJH7_ORYSI	69.28	4288	4628	1.08	483	493	10
tr|A2ZJH7|A2ZJH7_ORYSI	67.04	241.5	55.528	0.23	357	374	17
tr|A2ZJH7|A2ZJH7_ORYSI	66.43	26080	24910	0.96	246	254	8
tr|A2ZJH7|A2ZJH7_ORYSI	63.59	28490	18620	0.65	74	83	9
tr|A2ZJH7|A2ZJH7_ORYSI	62.73	743	708.821	0.95	357	380	23
tr|A2ZJH7|A2ZJH7_ORYSI	62.23	1140	640.74	0.56	358	380	22
tr|A2ZJH7|A2ZJH7_ORYSI	61.99	29220	32330	1.11	50	58	8
tr|A2ZJH7|A2ZJH7_ORYSI	54.94	805	802.494	1	362	380	18
tr|A2ZJH7|A2ZJH7_ORYSI	54.61	419	386.279	0.92	508	521	13
tr|A2ZJH7|A2ZJH7_ORYSI	52.23	679.5	349.099	0.51	181	203	22
tr|A2ZJH7|A2ZJH7_ORYSI	49.57	361	557.207	1.54	386	399	13
tr|A2ZJH7|A2ZJH7_ORYSI	48.91	997	1241	1.24	466	473	7
tr|A2ZJH7|A2ZJH7_ORYSI	44.93	6081	9248	1.52	41	47	6
tr|A2ZJH7|A2ZJH7_ORYSI	43.96	2345	2239	0.95	556	565	9
tr|A2ZJH7|A2ZJH7_ORYSI	43.86	34680	40890	1.18	313	319	6
tr|A2ZJH7|A2ZJH7_ORYSI	43.66	958.5	661.985	0.69	551	565	14
tr|A2ZJH7|A2ZJH7_ORYSI	41.47	477.5	123.126	0.26	483	494	11
tr|A2ZJH7|A2ZJH7_ORYSI	37.68	1730	884.095	0.51	455	465	10
tr|A2ZJH7|A2ZJH7_ORYSI	36.96	512.5	504.576	0.98	566	577	11
tr|A2ZJH7|A2ZJH7_ORYSI	34.73	12090	11080	0.92	255	261	6
tr|A2ZJH7|A2ZJH7_ORYSI	32.93	1395	1128	0.81	38	47	9
tr|A2ZJH7|A2ZJH7_ORYSI	30.34	1234	797.182	0.65	161	169	8
tr|A2ZJH7|A2ZJH7_ORYSI	28.41	473.5	398.35	0.84	494	505	11
tr|A2ZJH7|A2ZJH7_ORYSI	27.6	289.5	215.833	0.75	181	196	15
tr|A2ZJH7|A2ZJH7_ORYSI	27.02	1358	673.573	0.5	393	399	6
tr|A2ZJH7|A2ZJH7_ORYSI	24.93	49.5	308.54	6.23	436	465	29
tr|A2ZJH7|A2ZJH7_ORYSI	22.75	343.5	1219	3.55	62	70	8
tr|A0A0E0J8W3|A0A0E0J8W3_ORYNI	103.52	20130	18360	0.91	483	505	22
tr|A0A0E0J8W3|A0A0E0J8W3_ORYNI	95.31	18080	15610	0.86	339	356	17
tr|A0A0E0J8W3|A0A0E0J8W3_ORYNI	92.7	50300	45040	0.9	94	110	16
tr|A0A0E0J8W3|A0A0E0J8W3_ORYNI	90.16	16170	14000	0.87	322	338	16
tr|A0A0E0J8W3|A0A0E0J8W3_ORYNI	89.28	6083	5283	0.87	280	301	21
tr|A0A0E0J8W3|A0A0E0J8W3_ORYNI	87.8	42610	41240	0.97	387	399	12
tr|A0A0E0J8W3|A0A0E0J8W3_ORYNI	87.16	505.5	146.303	0.29	321	338	17
tr|A0A0E0J8W3|A0A0E0J8W3_ORYNI	85.36	11220	10450	0.93	94	110	16
tr|A0A0E0J8W3|A0A0E0J8W3_ORYNI	84.36	2522	1334	0.53	262	274	12
tr|A0A0E0J8W3|A0A0E0J8W3_ORYNI	82.93	20690	22270	1.08	233	245	12
tr|A0A0E0J8W3|A0A0E0J8W3_ORYNI	81.4	20450	18410	0.9	73	83	10
tr|A0A0E0J8W3|A0A0E0J8W3_ORYNI	80.52	1481	894.235	0.6	181	203	22
tr|A0A0E0J8W3|A0A0E0J8W3_ORYNI	80.06	4880	3859	0.79	566	578	12
tr|A0A0E0J8W3|A0A0E0J8W3_ORYNI	78.6	6316	6612	1.05	158	169	11
tr|A0A0E0J8W3|A0A0E0J8W3_ORYNI	77.54	10910	10530	0.96	158	168	10
tr|A0A0E0J8W3|A0A0E0J8W3_ORYNI	73.87	172800	185100	1.07	466	474	8
tr|A0A0E0J8W3|A0A0E0J8W3_ORYNI	72.42	4306	3902	0.91	522	535	13
tr|A0A0E0J8W3|A0A0E0J8W3_ORYNI	71.04	3544	2952	0.83	387	403	16
tr|A0A0E0J8W3|A0A0E0J8W3_ORYNI	70.8	19610	19910	1.02	59	70	11
tr|A0A0E0J8W3|A0A0E0J8W3_ORYNI	69.28	4288	4628	1.08	483	493	10
tr|A0A0E0J8W3|A0A0E0J8W3_ORYNI	67.04	241.5	55.528	0.23	357	374	17
tr|A0A0E0J8W3|A0A0E0J8W3_ORYNI	66.43	26080	24910	0.96	246	254	8
tr|A0A0E0J8W3|A0A0E0J8W3_ORYNI	63.59	28490	18620	0.65	74	83	9
tr|A0A0E0J8W3|A0A0E0J8W3_ORYNI	62.73	743	708.821	0.95	357	380	23
tr|A0A0E0J8W3|A0A0E0J8W3_ORYNI	62.23	1140	640.74	0.56	358	380	22
tr|A0A0E0J8W3|A0A0E0J8W3_ORYNI	61.99	29220	32330	1.11	50	58	8
tr|A0A0E0J8W3|A0A0E0J8W3_ORYNI	54.94	805	802.494	1	362	380	18
tr|A0A0E0J8W3|A0A0E0J8W3_ORYNI	54.61	419	386.279	0.92	508	521	13
tr|A0A0E0J8W3|A0A0E0J8W3_ORYNI	52.23	679.5	349.099	0.51	181	203	22
tr|A0A0E0J8W3|A0A0E0J8W3_ORYNI	49.57	361	557.207	1.54	386	399	13
tr|A0A0E0J8W3|A0A0E0J8W3_ORYNI	48.91	997	1241	1.24	466	473	7
tr|A0A0E0J8W3|A0A0E0J8W3_ORYNI	44.93	6081	9248	1.52	41	47	6
tr|A0A0E0J8W3|A0A0E0J8W3_ORYNI	43.96	2345	2239	0.95	556	565	9
tr|A0A0E0J8W3|A0A0E0J8W3_ORYNI	43.86	34680	40890	1.18	313	319	6
tr|A0A0E0J8W3|A0A0E0J8W3_ORYNI	43.66	958.5	661.985	0.69	551	565	14
tr|A0A0E0J8W3|A0A0E0J8W3_ORYNI	41.47	477.5	123.126	0.26	483	494	11
tr|A0A0E0J8W3|A0A0E0J8W3_ORYNI	37.68	1730	884.095	0.51	455	465	10
tr|A0A0E0J8W3|A0A0E0J8W3_ORYNI	36.96	512.5	504.576	0.98	566	577	11
tr|A0A0E0J8W3|A0A0E0J8W3_ORYNI	34.73	12090	11080	0.92	255	261	6
tr|A0A0E0J8W3|A0A0E0J8W3_ORYNI	32.93	1395	1128	0.81	38	47	9
tr|A0A0E0J8W3|A0A0E0J8W3_ORYNI	30.34	1234	797.182	0.65	161	169	8
tr|A0A0E0J8W3|A0A0E0J8W3_ORYNI	28.41	473.5	398.35	0.84	494	505	11
tr|A0A0E0J8W3|A0A0E0J8W3_ORYNI	27.6	289.5	215.833	0.75	181	196	15
tr|A0A0E0J8W3|A0A0E0J8W3_ORYNI	27.02	1358	673.573	0.5	393	399	6
tr|A0A0E0J8W3|A0A0E0J8W3_ORYNI	24.93	49.5	308.54	6.23	436	465	29
tr|A0A0E0J8W3|A0A0E0J8W3_ORYNI	22.75	343.5	1219	3.55	62	70	8
Q6AVA8|PPDK1_ORYSJ	115.3	11860	11300	0.95	503	523	20
Q6AVA8|PPDK1_ORYSJ	110.87	19740	22310	1.13	713	728	15
Q6AVA8|PPDK1_ORYSJ	109.01	3392	3494	1.03	861	882	21
Q6AVA8|PPDK1_ORYSJ	107.37	2440	2801	1.15	465	496	31
Q6AVA8|PPDK1_ORYSJ	102.44	68860	78820	1.14	610	624	14
Q6AVA8|PPDK1_ORYSJ	97.84	4003	2987	0.75	211	230	19
Q6AVA8|PPDK1_ORYSJ	96.71	3504	4481	1.28	441	462	21
Q6AVA8|PPDK1_ORYSJ	90.6	2066	2380	1.15	904	922	18
Q6AVA8|PPDK1_ORYSJ	89.05	931	1109	1.19	211	230	19
Q6AVA8|PPDK1_ORYSJ	86.29	39290	36460	0.93	746	759	13
Q6AVA8|PPDK1_ORYSJ	85.21	2439	1995	0.82	503	523	20
Q6AVA8|PPDK1_ORYSJ	80.47	10020	10630	1.06	239	252	13
Q6AVA8|PPDK1_ORYSJ	79.41	29870	32340	1.08	923	934	11
Q6AVA8|PPDK1_ORYSJ	78.01	20420	23200	1.14	610	624	14
Q6AVA8|PPDK1_ORYSJ	77.91	4668	4861	1.04	693	712	19
Q6AVA8|PPDK1_ORYSJ	75.14	1044	1569	1.5	441	462	21
Q6AVA8|PPDK1_ORYSJ	74.42	5670	6444	1.14	636	646	10
Q6AVA8|PPDK1_ORYSJ	71.96	10990	13750	1.25	540	549	9
Q6AVA8|PPDK1_ORYSJ	68.65	22620	22240	0.98	652	662	10
Q6AVA8|PPDK1_ORYSJ	65.67	43530	42800	0.98	816	824	8
Q6AVA8|PPDK1_ORYSJ	65.44	16290	13170	0.81	361	369	8
Q6AVA8|PPDK1_ORYSJ	64.38	24860	25160	1.01	423	435	12
Q6AVA8|PPDK1_ORYSJ	63.46	8720	7888	0.9	65	74	9
Q6AVA8|PPDK1_ORYSJ	61.95	7263	9382	1.29	484	496	12
Q6AVA8|PPDK1_ORYSJ	61.85	1016	1831	1.8	716	728	12
Q6AVA8|PPDK1_ORYSJ	61.13	8202	8424	1.03	746	759	13
Q6AVA8|PPDK1_ORYSJ	60.61	662	352.479	0.53	277	293	16
Q6AVA8|PPDK1_ORYSJ	59.25	26010	26290	1.01	675	682	7
Q6AVA8|PPDK1_ORYSJ	58.49	420	422.009	1	370	384	14
Q6AVA8|PPDK1_ORYSJ	58.05	600.5	378.07	0.63	211	230	19
Q6AVA8|PPDK1_ORYSJ	57.31	4133	3163	0.77	625	635	10
Q6AVA8|PPDK1_ORYSJ	56.61	4538	3431	0.76	614	624	10
Q6AVA8|PPDK1_ORYSJ	54.05	2469	2103	0.85	693	712	19
Q6AVA8|PPDK1_ORYSJ	53.66	6513	8202	1.26	361	369	8
Q6AVA8|PPDK1_ORYSJ	53.19	6397	7354	1.15	267	276	9
Q6AVA8|PPDK1_ORYSJ	51.7	2930	3657	1.25	267	275	8
Q6AVA8|PPDK1_ORYSJ	51.52	369.5	129.886	0.35	563	583	20
Q6AVA8|PPDK1_ORYSJ	48.99	13540	16200	1.2	260	266	6
Q6AVA8|PPDK1_ORYSJ	48.43	9210	10470	1.14	423	435	12
Q6AVA8|PPDK1_ORYSJ	48.4	1720	2091	1.22	321	333	12
Q6AVA8|PPDK1_ORYSJ	47.62	1502	1925	1.28	784	798	14
Q6AVA8|PPDK1_ORYSJ	45.94	5771	7772	1.35	804	810	6
Q6AVA8|PPDK1_ORYSJ	45.89	819.5	190.725	0.23	423	436	13
Q6AVA8|PPDK1_ORYSJ	44.28	4209	4350	1.03	652	662	10
Q6AVA8|PPDK1_ORYSJ	42.51	167.5	154.029	0.92	308	320	12
Q6AVA8|PPDK1_ORYSJ	42.4	782	448.083	0.57	904	920	16
Q6AVA8|PPDK1_ORYSJ	41.61	14440	15270	1.06	556	562	6
Q6AVA8|PPDK1_ORYSJ	40.6	317.5	514.233	1.62	281	293	12
Q6AVA8|PPDK1_ORYSJ	38.88	357.5	339.442	0.95	218	230	12
Q6AVA8|PPDK1_ORYSJ	38.72	285.5	220.662	0.77	284	293	9
Q6AVA8|PPDK1_ORYSJ	37.83	186.5	134.715	0.72	117	131	14
Q6AVA8|PPDK1_ORYSJ	37.77	2742	3491	1.27	652	662	10
Q6AVA8|PPDK1_ORYSJ	36.91	219.5	235.147	1.07	503	514	11
Q6AVA8|PPDK1_ORYSJ	35.72	1312	1775	1.35	636	646	10
Q6AVA8|PPDK1_ORYSJ	34.76	451.5	244.804	0.54	612	624	12
Q6AVA8|PPDK1_ORYSJ	34.4	345.5	214.867	0.62	867	882	15
Q6AVA8|PPDK1_ORYSJ	33.92	5590	5838	1.04	334	340	6
Q6AVA8|PPDK1_ORYSJ	28.97	825.5	1025	1.24	816	824	8
Q6AVA8|PPDK1_ORYSJ	24.66	338.5	504.576	1.49	746	756	10
Q6AVA8|PPDK1_ORYSJ	24	487.5	834.845	1.71	599	606	7
Q6AVA8|PPDK1_ORYSJ	23.96	261.5	325.923	1.25	503	516	13
Q6AVA8|PPDK1_ORYSJ	22.62	99.5	221.627	2.23	441	464	23
Q6AVA8|PPDK1_ORYSJ	22.45	32.5	346.202	10.65	746	756	10
tr|Q7XZW5|Q7XZW5_ORYSJ	136.2	2934	2322	0.79	64	96	32
tr|Q7XZW5|Q7XZW5_ORYSJ	110.98	22330	22230	1	45	63	18
tr|Q7XZW5|Q7XZW5_ORYSJ	102.57	67310	63870	0.95	260	275	15
tr|Q7XZW5|Q7XZW5_ORYSJ	94.73	948.5	1036	1.09	97	122	25
tr|Q7XZW5|Q7XZW5_ORYSJ	92.19	43650	40030	0.92	315	331	16
tr|Q7XZW5|Q7XZW5_ORYSJ	90.76	9490	9459	1	260	275	15
tr|Q7XZW5|Q7XZW5_ORYSJ	90.61	13120	11580	0.88	45	63	18
tr|Q7XZW5|Q7XZW5_ORYSJ	90.31	22150	16380	0.74	195	208	13
tr|Q7XZW5|Q7XZW5_ORYSJ	88.31	4002	2001	0.5	227	246	19
tr|Q7XZW5|Q7XZW5_ORYSJ	85.33	4387	4660	1.06	286	309	23
tr|Q7XZW5|Q7XZW5_ORYSJ	82.43	15750	14070	0.89	153	174	21
tr|Q7XZW5|Q7XZW5_ORYSJ	81.72	466	619.977	1.33	64	96	32
tr|Q7XZW5|Q7XZW5_ORYSJ	74.77	6852	6909	1.01	209	218	9
tr|Q7XZW5|Q7XZW5_ORYSJ	73.09	65510	50950	0.78	184	194	10
tr|Q7XZW5|Q7XZW5_ORYSJ	70.54	17730	14390	0.81	209	226	17
tr|Q7XZW5|Q7XZW5_ORYSJ	68.99	3433	2867	0.84	294	309	15
tr|Q7XZW5|Q7XZW5_ORYSJ	68.53	106.5	296.952	2.79	97	122	25
tr|Q7XZW5|Q7XZW5_ORYSJ	61.84	65820	64460	0.98	340	347	7
tr|Q7XZW5|Q7XZW5_ORYSJ	57.83	6558	5236	0.8	86	96	10
tr|Q7XZW5|Q7XZW5_ORYSJ	57.78	2496	1767	0.71	129	140	11
tr|Q7XZW5|Q7XZW5_ORYSJ	57.64	10840	10360	0.96	339	347	8
tr|Q7XZW5|Q7XZW5_ORYSJ	57.43	284.5	473.674	1.66	209	246	37
tr|Q7XZW5|Q7XZW5_ORYSJ	56.6	61600	67160	1.09	141	148	7
tr|Q7XZW5|Q7XZW5_ORYSJ	56.21	2206	1856	0.84	157	174	17
tr|Q7XZW5|Q7XZW5_ORYSJ	54.17	2176	2213	1.02	260	271	11
tr|Q7XZW5|Q7XZW5_ORYSJ	53.74	3466	2911	0.84	36	44	8
tr|Q7XZW5|Q7XZW5_ORYSJ	53.66	663	374.69	0.57	73	96	23
tr|Q7XZW5|Q7XZW5_ORYSJ	52.85	3058	5579	1.82	23	35	12
tr|Q7XZW5|Q7XZW5_ORYSJ	52.49	821.5	736.344	0.9	157	175	18
tr|Q7XZW5|Q7XZW5_ORYSJ	52.48	953.5	501.679	0.53	64	78	14
tr|Q7XZW5|Q7XZW5_ORYSJ	52.16	862.5	391.59	0.45	153	175	22
tr|Q7XZW5|Q7XZW5_ORYSJ	51.85	27580	29730	1.08	340	347	7
tr|Q7XZW5|Q7XZW5_ORYSJ	51.65	83360	68950	0.83	348	354	6
tr|Q7XZW5|Q7XZW5_ORYSJ	49.99	1240	1214	0.98	64	72	8
tr|Q7XZW5|Q7XZW5_ORYSJ	48.71	181.5	134.715	0.74	79	96	17
tr|Q7XZW5|Q7XZW5_ORYSJ	46.4	1469	1309	0.89	296	309	13
tr|Q7XZW5|Q7XZW5_ORYSJ	44.82	11260	7429	0.66	332	339	7
tr|Q7XZW5|Q7XZW5_ORYSJ	43.94	24580	22520	0.92	332	338	6
tr|Q7XZW5|Q7XZW5_ORYSJ	43.93	746	32.351	0.04	72	96	24
tr|Q7XZW5|Q7XZW5_ORYSJ	43.45	343	420.078	1.22	209	222	13
tr|Q7XZW5|Q7XZW5_ORYSJ	40.04	19110	19900	1.04	276	282	6
tr|Q7XZW5|Q7XZW5_ORYSJ	38.08	2501	2994	1.2	299	309	10
tr|Q7XZW5|Q7XZW5_ORYSJ	37.73	501.5	812.634	1.62	237	246	9
tr|Q7XZW5|Q7XZW5_ORYSJ	37.03	864.5	886.992	1.03	260	271	11
tr|Q7XZW5|Q7XZW5_ORYSJ	34.81	369.5	824.222	2.23	235	246	11
tr|Q7XZW5|Q7XZW5_ORYSJ	34.8	907.5	365.516	0.4	45	60	15
tr|Q7XZW5|Q7XZW5_ORYSJ	32.41	258.5	415.732	1.61	68	96	28
tr|Q7XZW5|Q7XZW5_ORYSJ	31.88	14420	11690	0.81	332	338	6
tr|Q7XZW5|Q7XZW5_ORYSJ	30.73	235.5	239.976	1.02	45	61	16
tr|Q7XZW5|Q7XZW5_ORYSJ	28.95	462.5	172.377	0.37	339	347	8
tr|Q7XZW5|Q7XZW5_ORYSJ	26.08	608.5	786.56	1.29	348	354	6
tr|A2XME9|A2XME9_ORYSI	136.2	2934	2322	0.79	64	96	32
tr|A2XME9|A2XME9_ORYSI	110.98	22330	22230	1	45	63	18
tr|A2XME9|A2XME9_ORYSI	102.57	67310	63870	0.95	260	275	15
tr|A2XME9|A2XME9_ORYSI	94.73	948.5	1036	1.09	97	122	25
tr|A2XME9|A2XME9_ORYSI	92.19	43650	40030	0.92	315	331	16
tr|A2XME9|A2XME9_ORYSI	90.76	9490	9459	1	260	275	15
tr|A2XME9|A2XME9_ORYSI	90.61	13120	11580	0.88	45	63	18
tr|A2XME9|A2XME9_ORYSI	90.31	22150	16380	0.74	195	208	13
tr|A2XME9|A2XME9_ORYSI	88.31	4002	2001	0.5	227	246	19
tr|A2XME9|A2XME9_ORYSI	85.33	4387	4660	1.06	286	309	23
tr|A2XME9|A2XME9_ORYSI	82.43	15750	14070	0.89	153	174	21
tr|A2XME9|A2XME9_ORYSI	81.72	466	619.977	1.33	64	96	32
tr|A2XME9|A2XME9_ORYSI	74.77	6852	6909	1.01	209	218	9
tr|A2XME9|A2XME9_ORYSI	73.09	65510	50950	0.78	184	194	10
tr|A2XME9|A2XME9_ORYSI	70.54	17730	14390	0.81	209	226	17
tr|A2XME9|A2XME9_ORYSI	68.99	3433	2867	0.84	294	309	15
tr|A2XME9|A2XME9_ORYSI	68.53	106.5	296.952	2.79	97	122	25
tr|A2XME9|A2XME9_ORYSI	61.84	65820	64460	0.98	340	347	7
tr|A2XME9|A2XME9_ORYSI	57.83	6558	5236	0.8	86	96	10
tr|A2XME9|A2XME9_ORYSI	57.78	2496	1767	0.71	129	140	11
tr|A2XME9|A2XME9_ORYSI	57.64	10840	10360	0.96	339	347	8
tr|A2XME9|A2XME9_ORYSI	57.43	284.5	473.674	1.66	209	246	37
tr|A2XME9|A2XME9_ORYSI	56.6	61600	67160	1.09	141	148	7
tr|A2XME9|A2XME9_ORYSI	56.21	2206	1856	0.84	157	174	17
tr|A2XME9|A2XME9_ORYSI	54.17	2176	2213	1.02	260	271	11
tr|A2XME9|A2XME9_ORYSI	53.74	3466	2911	0.84	36	44	8
tr|A2XME9|A2XME9_ORYSI	53.66	663	374.69	0.57	73	96	23
tr|A2XME9|A2XME9_ORYSI	52.85	3058	5579	1.82	23	35	12
tr|A2XME9|A2XME9_ORYSI	52.49	821.5	736.344	0.9	157	175	18
tr|A2XME9|A2XME9_ORYSI	52.48	953.5	501.679	0.53	64	78	14
tr|A2XME9|A2XME9_ORYSI	52.16	862.5	391.59	0.45	153	175	22
tr|A2XME9|A2XME9_ORYSI	51.85	27580	29730	1.08	340	347	7
tr|A2XME9|A2XME9_ORYSI	51.65	83360	68950	0.83	348	354	6
tr|A2XME9|A2XME9_ORYSI	49.99	1240	1214	0.98	64	72	8
tr|A2XME9|A2XME9_ORYSI	48.71	181.5	134.715	0.74	79	96	17
tr|A2XME9|A2XME9_ORYSI	46.4	1469	1309	0.89	296	309	13
tr|A2XME9|A2XME9_ORYSI	44.82	11260	7429	0.66	332	339	7
tr|A2XME9|A2XME9_ORYSI	43.94	24580	22520	0.92	332	338	6
tr|A2XME9|A2XME9_ORYSI	43.93	746	32.351	0.04	72	96	24
tr|A2XME9|A2XME9_ORYSI	43.45	343	420.078	1.22	209	222	13
tr|A2XME9|A2XME9_ORYSI	40.04	19110	19900	1.04	276	282	6
tr|A2XME9|A2XME9_ORYSI	38.08	2501	2994	1.2	299	309	10
tr|A2XME9|A2XME9_ORYSI	37.73	501.5	812.634	1.62	237	246	9
tr|A2XME9|A2XME9_ORYSI	37.03	864.5	886.992	1.03	260	271	11
tr|A2XME9|A2XME9_ORYSI	34.81	369.5	824.222	2.23	235	246	11
tr|A2XME9|A2XME9_ORYSI	34.8	907.5	365.516	0.4	45	60	15
tr|A2XME9|A2XME9_ORYSI	32.41	258.5	415.732	1.61	68	96	28
tr|A2XME9|A2XME9_ORYSI	31.88	14420	11690	0.81	332	338	6
tr|A2XME9|A2XME9_ORYSI	30.73	235.5	239.976	1.02	45	61	16
tr|A2XME9|A2XME9_ORYSI	28.95	462.5	172.377	0.37	339	347	8
tr|A2XME9|A2XME9_ORYSI	26.08	608.5	786.56	1.29	348	354	6
tr|A0A0E0GUE4|A0A0E0GUE4_ORYNI	136.2	2934	2322	0.79	64	96	32
tr|A0A0E0GUE4|A0A0E0GUE4_ORYNI	110.98	22330	22230	1	45	63	18
tr|A0A0E0GUE4|A0A0E0GUE4_ORYNI	102.57	67310	63870	0.95	260	275	15
tr|A0A0E0GUE4|A0A0E0GUE4_ORYNI	94.73	948.5	1036	1.09	97	122	25
tr|A0A0E0GUE4|A0A0E0GUE4_ORYNI	92.19	43650	40030	0.92	315	331	16
tr|A0A0E0GUE4|A0A0E0GUE4_ORYNI	90.76	9490	9459	1	260	275	15
tr|A0A0E0GUE4|A0A0E0GUE4_ORYNI	90.61	13120	11580	0.88	45	63	18
tr|A0A0E0GUE4|A0A0E0GUE4_ORYNI	90.31	22150	16380	0.74	195	208	13
tr|A0A0E0GUE4|A0A0E0GUE4_ORYNI	88.31	4002	2001	0.5	227	246	19
tr|A0A0E0GUE4|A0A0E0GUE4_ORYNI	85.33	4387	4660	1.06	286	309	23
tr|A0A0E0GUE4|A0A0E0GUE4_ORYNI	82.43	15750	14070	0.89	153	174	21
tr|A0A0E0GUE4|A0A0E0GUE4_ORYNI	81.72	466	619.977	1.33	64	96	32
tr|A0A0E0GUE4|A0A0E0GUE4_ORYNI	74.77	6852	6909	1.01	209	218	9
tr|A0A0E0GUE4|A0A0E0GUE4_ORYNI	73.09	65510	50950	0.78	184	194	10
tr|A0A0E0GUE4|A0A0E0GUE4_ORYNI	70.54	17730	14390	0.81	209	226	17
tr|A0A0E0GUE4|A0A0E0GUE4_ORYNI	68.99	3433	2867	0.84	294	309	15
tr|A0A0E0GUE4|A0A0E0GUE4_ORYNI	68.53	106.5	296.952	2.79	97	122	25
tr|A0A0E0GUE4|A0A0E0GUE4_ORYNI	61.84	65820	64460	0.98	340	347	7
tr|A0A0E0GUE4|A0A0E0GUE4_ORYNI	57.83	6558	5236	0.8	86	96	10
tr|A0A0E0GUE4|A0A0E0GUE4_ORYNI	57.78	2496	1767	0.71	129	140	11
tr|A0A0E0GUE4|A0A0E0GUE4_ORYNI	57.64	10840	10360	0.96	339	347	8
tr|A0A0E0GUE4|A0A0E0GUE4_ORYNI	57.43	284.5	473.674	1.66	209	246	37
tr|A0A0E0GUE4|A0A0E0GUE4_ORYNI	56.6	61600	67160	1.09	141	148	7
tr|A0A0E0GUE4|A0A0E0GUE4_ORYNI	56.21	2206	1856	0.84	157	174	17
tr|A0A0E0GUE4|A0A0E0GUE4_ORYNI	54.17	2176	2213	1.02	260	271	11
tr|A0A0E0GUE4|A0A0E0GUE4_ORYNI	53.74	3466	2911	0.84	36	44	8
tr|A0A0E0GUE4|A0A0E0GUE4_ORYNI	53.66	663	374.69	0.57	73	96	23
tr|A0A0E0GUE4|A0A0E0GUE4_ORYNI	52.85	3058	5579	1.82	23	35	12
tr|A0A0E0GUE4|A0A0E0GUE4_ORYNI	52.49	821.5	736.344	0.9	157	175	18
tr|A0A0E0GUE4|A0A0E0GUE4_ORYNI	52.48	953.5	501.679	0.53	64	78	14
tr|A0A0E0GUE4|A0A0E0GUE4_ORYNI	52.16	862.5	391.59	0.45	153	175	22
tr|A0A0E0GUE4|A0A0E0GUE4_ORYNI	51.85	27580	29730	1.08	340	347	7
tr|A0A0E0GUE4|A0A0E0GUE4_ORYNI	51.65	83360	68950	0.83	348	354	6
tr|A0A0E0GUE4|A0A0E0GUE4_ORYNI	49.99	1240	1214	0.98	64	72	8
tr|A0A0E0GUE4|A0A0E0GUE4_ORYNI	48.71	181.5	134.715	0.74	79	96	17
tr|A0A0E0GUE4|A0A0E0GUE4_ORYNI	46.4	1469	1309	0.89	296	309	13
tr|A0A0E0GUE4|A0A0E0GUE4_ORYNI	44.82	11260	7429	0.66	332	339	7
tr|A0A0E0GUE4|A0A0E0GUE4_ORYNI	43.94	24580	22520	0.92	332	338	6
tr|A0A0E0GUE4|A0A0E0GUE4_ORYNI	43.93	746	32.351	0.04	72	96	24
tr|A0A0E0GUE4|A0A0E0GUE4_ORYNI	43.45	343	420.078	1.22	209	222	13
tr|A0A0E0GUE4|A0A0E0GUE4_ORYNI	40.04	19110	19900	1.04	276	282	6
tr|A0A0E0GUE4|A0A0E0GUE4_ORYNI	38.08	2501	2994	1.2	299	309	10
tr|A0A0E0GUE4|A0A0E0GUE4_ORYNI	37.73	501.5	812.634	1.62	237	246	9
tr|A0A0E0GUE4|A0A0E0GUE4_ORYNI	37.03	864.5	886.992	1.03	260	271	11
tr|A0A0E0GUE4|A0A0E0GUE4_ORYNI	34.81	369.5	824.222	2.23	235	246	11
tr|A0A0E0GUE4|A0A0E0GUE4_ORYNI	34.8	907.5	365.516	0.4	45	60	15
tr|A0A0E0GUE4|A0A0E0GUE4_ORYNI	32.41	258.5	415.732	1.61	68	96	28
tr|A0A0E0GUE4|A0A0E0GUE4_ORYNI	31.88	14420	11690	0.81	332	338	6
tr|A0A0E0GUE4|A0A0E0GUE4_ORYNI	30.73	235.5	239.976	1.02	45	61	16
tr|A0A0E0GUE4|A0A0E0GUE4_ORYNI	28.95	462.5	172.377	0.37	339	347	8
tr|A0A0E0GUE4|A0A0E0GUE4_ORYNI	26.08	608.5	786.56	1.29	348	354	6
tr|A0A0E0GUE5|A0A0E0GUE5_ORYNI	136.2	2934	2322	0.79	64	96	32
tr|A0A0E0GUE5|A0A0E0GUE5_ORYNI	110.98	22330	22230	1	45	63	18
tr|A0A0E0GUE5|A0A0E0GUE5_ORYNI	102.57	67310	63870	0.95	260	275	15
tr|A0A0E0GUE5|A0A0E0GUE5_ORYNI	94.73	948.5	1036	1.09	97	122	25
tr|A0A0E0GUE5|A0A0E0GUE5_ORYNI	92.19	43650	40030	0.92	315	331	16
tr|A0A0E0GUE5|A0A0E0GUE5_ORYNI	90.76	9490	9459	1	260	275	15
tr|A0A0E0GUE5|A0A0E0GUE5_ORYNI	90.61	13120	11580	0.88	45	63	18
tr|A0A0E0GUE5|A0A0E0GUE5_ORYNI	90.31	22150	16380	0.74	195	208	13
tr|A0A0E0GUE5|A0A0E0GUE5_ORYNI	88.31	4002	2001	0.5	227	246	19
tr|A0A0E0GUE5|A0A0E0GUE5_ORYNI	85.33	4387	4660	1.06	286	309	23
tr|A0A0E0GUE5|A0A0E0GUE5_ORYNI	82.43	15750	14070	0.89	153	174	21
tr|A0A0E0GUE5|A0A0E0GUE5_ORYNI	81.72	466	619.977	1.33	64	96	32
tr|A0A0E0GUE5|A0A0E0GUE5_ORYNI	74.77	6852	6909	1.01	209	218	9
tr|A0A0E0GUE5|A0A0E0GUE5_ORYNI	73.09	65510	50950	0.78	184	194	10
tr|A0A0E0GUE5|A0A0E0GUE5_ORYNI	70.54	17730	14390	0.81	209	226	17
tr|A0A0E0GUE5|A0A0E0GUE5_ORYNI	68.99	3433	2867	0.84	294	309	15
tr|A0A0E0GUE5|A0A0E0GUE5_ORYNI	68.53	106.5	296.952	2.79	97	122	25
tr|A0A0E0GUE5|A0A0E0GUE5_ORYNI	61.84	65820	64460	0.98	340	347	7
tr|A0A0E0GUE5|A0A0E0GUE5_ORYNI	57.83	6558	5236	0.8	86	96	10
tr|A0A0E0GUE5|A0A0E0GUE5_ORYNI	57.78	2496	1767	0.71	129	140	11
tr|A0A0E0GUE5|A0A0E0GUE5_ORYNI	57.64	10840	10360	0.96	339	347	8
tr|A0A0E0GUE5|A0A0E0GUE5_ORYNI	57.43	284.5	473.674	1.66	209	246	37
tr|A0A0E0GUE5|A0A0E0GUE5_ORYNI	56.6	61600	67160	1.09	141	148	7
tr|A0A0E0GUE5|A0A0E0GUE5_ORYNI	56.21	2206	1856	0.84	157	174	17
tr|A0A0E0GUE5|A0A0E0GUE5_ORYNI	54.17	2176	2213	1.02	260	271	11
tr|A0A0E0GUE5|A0A0E0GUE5_ORYNI	53.74	3466	2911	0.84	36	44	8
tr|A0A0E0GUE5|A0A0E0GUE5_ORYNI	53.66	663	374.69	0.57	73	96	23
tr|A0A0E0GUE5|A0A0E0GUE5_ORYNI	52.85	3058	5579	1.82	23	35	12
tr|A0A0E0GUE5|A0A0E0GUE5_ORYNI	52.49	821.5	736.344	0.9	157	175	18
tr|A0A0E0GUE5|A0A0E0GUE5_ORYNI	52.48	953.5	501.679	0.53	64	78	14
tr|A0A0E0GUE5|A0A0E0GUE5_ORYNI	52.16	862.5	391.59	0.45	153	175	22
tr|A0A0E0GUE5|A0A0E0GUE5_ORYNI	51.85	27580	29730	1.08	340	347	7
tr|A0A0E0GUE5|A0A0E0GUE5_ORYNI	51.65	83360	68950	0.83	348	354	6
tr|A0A0E0GUE5|A0A0E0GUE5_ORYNI	49.99	1240	1214	0.98	64	72	8
tr|A0A0E0GUE5|A0A0E0GUE5_ORYNI	48.71	181.5	134.715	0.74	79	96	17
tr|A0A0E0GUE5|A0A0E0GUE5_ORYNI	46.4	1469	1309	0.89	296	309	13
tr|A0A0E0GUE5|A0A0E0GUE5_ORYNI	44.82	11260	7429	0.66	332	339	7
tr|A0A0E0GUE5|A0A0E0GUE5_ORYNI	43.94	24580	22520	0.92	332	338	6
tr|A0A0E0GUE5|A0A0E0GUE5_ORYNI	43.93	746	32.351	0.04	72	96	24
tr|A0A0E0GUE5|A0A0E0GUE5_ORYNI	43.45	343	420.078	1.22	209	222	13
tr|A0A0E0GUE5|A0A0E0GUE5_ORYNI	40.04	19110	19900	1.04	276	282	6
tr|A0A0E0GUE5|A0A0E0GUE5_ORYNI	38.08	2501	2994	1.2	299	309	10
tr|A0A0E0GUE5|A0A0E0GUE5_ORYNI	37.73	501.5	812.634	1.62	237	246	9
tr|A0A0E0GUE5|A0A0E0GUE5_ORYNI	37.03	864.5	886.992	1.03	260	271	11
tr|A0A0E0GUE5|A0A0E0GUE5_ORYNI	34.81	369.5	824.222	2.23	235	246	11
tr|A0A0E0GUE5|A0A0E0GUE5_ORYNI	34.8	907.5	365.516	0.4	45	60	15
tr|A0A0E0GUE5|A0A0E0GUE5_ORYNI	32.41	258.5	415.732	1.61	68	96	28
tr|A0A0E0GUE5|A0A0E0GUE5_ORYNI	31.88	14420	11690	0.81	332	338	6
tr|A0A0E0GUE5|A0A0E0GUE5_ORYNI	30.73	235.5	239.976	1.02	45	61	16
tr|A0A0E0GUE5|A0A0E0GUE5_ORYNI	28.95	462.5	172.377	0.37	339	347	8
tr|A0A0E0GUE5|A0A0E0GUE5_ORYNI	26.08	608.5	786.56	1.29	348	354	6
tr|B8AVN6|B8AVN6_ORYSI	107.97	38330	35580	0.93	294	311	17
tr|B8AVN6|B8AVN6_ORYSI	102.89	31450	26790	0.85	75	90	15
tr|B8AVN6|B8AVN6_ORYSI	102.84	3506	2528	0.72	348	367	19
tr|B8AVN6|B8AVN6_ORYSI	102.17	410.5	155.96	0.38	194	221	27
tr|B8AVN6|B8AVN6_ORYSI	95.23	5570	5833	1.05	175	193	18
tr|B8AVN6|B8AVN6_ORYSI	94.98	4156	2534	0.61	257	274	17
tr|B8AVN6|B8AVN6_ORYSI	93.13	87900	69440	0.79	60	74	14
tr|B8AVN6|B8AVN6_ORYSI	91.2	1959	1637	0.84	140	163	23
tr|B8AVN6|B8AVN6_ORYSI	86.25	1120	1466	1.31	140	162	22
tr|B8AVN6|B8AVN6_ORYSI	84.43	49610	43360	0.87	95	108	13
tr|B8AVN6|B8AVN6_ORYSI	79.81	11900	9094	0.76	333	346	13
tr|B8AVN6|B8AVN6_ORYSI	76.09	19260	15630	0.81	280	293	13
tr|B8AVN6|B8AVN6_ORYSI	75.86	614.5	1042	1.69	140	163	23
tr|B8AVN6|B8AVN6_ORYSI	75.26	12130	11260	0.93	60	74	14
tr|B8AVN6|B8AVN6_ORYSI	75.18	282400	215200	0.76	49	59	10
tr|B8AVN6|B8AVN6_ORYSI	74.97	172200	135900	0.79	48	59	11
tr|B8AVN6|B8AVN6_ORYSI	74.48	5088	5631	1.11	60	74	14
tr|B8AVN6|B8AVN6_ORYSI	70.02	9248	6487	0.7	301	311	10
tr|B8AVN6|B8AVN6_ORYSI	69.5	1336	1364	1.02	148	162	14
tr|B8AVN6|B8AVN6_ORYSI	68.71	1794	1299	0.72	403	422	19
tr|B8AVN6|B8AVN6_ORYSI	68.45	27750	22080	0.8	312	324	12
tr|B8AVN6|B8AVN6_ORYSI	68.03	2121	2203	1.04	408	422	14
tr|B8AVN6|B8AVN6_ORYSI	66.38	25450	26050	1.02	312	323	11
tr|B8AVN6|B8AVN6_ORYSI	65	1862	2029	1.09	148	163	15
tr|B8AVN6|B8AVN6_ORYSI	64.95	2916	1774	0.61	60	74	14
tr|B8AVN6|B8AVN6_ORYSI	62.92	35310	31410	0.89	166	174	8
tr|B8AVN6|B8AVN6_ORYSI	62.78	99890	80430	0.81	315	324	9
tr|B8AVN6|B8AVN6_ORYSI	61.95	11320	10640	0.94	182	193	11
tr|B8AVN6|B8AVN6_ORYSI	61.85	66640	52820	0.79	315	323	8
tr|B8AVN6|B8AVN6_ORYSI	59.07	163600	142600	0.87	226	233	7
tr|B8AVN6|B8AVN6_ORYSI	56.07	3655	4410	1.21	280	311	31
tr|B8AVN6|B8AVN6_ORYSI	55.92	42030	34980	0.83	381	388	7
tr|B8AVN6|B8AVN6_ORYSI	55.42	797.5	356.825	0.45	333	344	11
tr|B8AVN6|B8AVN6_ORYSI	54.87	333.5	239.976	0.72	398	422	24
tr|B8AVN6|B8AVN6_ORYSI	54.55	2884	2308	0.8	183	193	10
tr|B8AVN6|B8AVN6_ORYSI	51.16	326.5	207.142	0.63	76	90	14
tr|B8AVN6|B8AVN6_ORYSI	50.18	710.5	593.421	0.84	262	274	12
tr|B8AVN6|B8AVN6_ORYSI	50.08	90990	76020	0.84	325	332	7
tr|B8AVN6|B8AVN6_ORYSI	49.72	29860	27450	0.92	214	221	7
tr|B8AVN6|B8AVN6_ORYSI	48.93	4662	4325	0.93	99	108	9
tr|B8AVN6|B8AVN6_ORYSI	48.2	4642	4673	1.01	312	324	12
tr|B8AVN6|B8AVN6_ORYSI	47.6	2528	2145	0.85	46	59	13
tr|B8AVN6|B8AVN6_ORYSI	45.67	36170	18470	0.51	373	380	7
tr|B8AVN6|B8AVN6_ORYSI	45.26	2384	2256	0.95	401	422	21
tr|B8AVN6|B8AVN6_ORYSI	44.88	2428	1417	0.58	80	90	10
tr|B8AVN6|B8AVN6_ORYSI	43.93	9470	7830	0.83	324	332	8
tr|B8AVN6|B8AVN6_ORYSI	43.55	480.5	436.012	0.91	144	163	19
tr|B8AVN6|B8AVN6_ORYSI	43.06	1740	1767	1.02	356	367	11
tr|B8AVN6|B8AVN6_ORYSI	41.15	3954	3385	0.86	312	323	11
tr|B8AVN6|B8AVN6_ORYSI	39.03	438.5	211.005	0.48	140	162	22
tr|B8AVN6|B8AVN6_ORYSI	38.62	511.5	329.785	0.64	149	162	13
tr|B8AVN6|B8AVN6_ORYSI	36.66	2800	2549	0.91	389	402	13
tr|B8AVN6|B8AVN6_ORYSI	36.12	233.5	109.607	0.47	175	186	11
tr|B8AVN6|B8AVN6_ORYSI	35.66	135.5	144.372	1.07	348	359	11
tr|B8AVN6|B8AVN6_ORYSI	34.99	226.5	139.543	0.62	389	407	18
tr|B8AVN6|B8AVN6_ORYSI	31.69	1678	1759	1.05	289	311	22
tr|B8AVN6|B8AVN6_ORYSI	30.1	1044	856.09	0.82	348	360	12
tr|B8AVN6|B8AVN6_ORYSI	29.37	1235	396.901	0.32	166	172	6
tr|B8AVN6|B8AVN6_ORYSI	27.83	697	0	0	348	366	18
tr|B8AVN6|B8AVN6_ORYSI	26.72	1508	554.31	0.37	175	182	7
tr|B8AVN6|B8AVN6_ORYSI	22.5	622.5	287.295	0.46	175	181	6
tr|B8AVN6|B8AVN6_ORYSI	22.14	479.5	125.058	0.26	348	362	14
tr|Q01HZ7|Q01HZ7_ORYSA	107.97	38330	35580	0.93	294	311	17
tr|Q01HZ7|Q01HZ7_ORYSA	102.89	31450	26790	0.85	75	90	15
tr|Q01HZ7|Q01HZ7_ORYSA	102.84	3506	2528	0.72	348	367	19
tr|Q01HZ7|Q01HZ7_ORYSA	102.17	410.5	155.96	0.38	194	221	27
tr|Q01HZ7|Q01HZ7_ORYSA	95.23	5570	5833	1.05	175	193	18
tr|Q01HZ7|Q01HZ7_ORYSA	94.98	4156	2534	0.61	257	274	17
tr|Q01HZ7|Q01HZ7_ORYSA	93.13	87900	69440	0.79	60	74	14
tr|Q01HZ7|Q01HZ7_ORYSA	91.2	1959	1637	0.84	140	163	23
tr|Q01HZ7|Q01HZ7_ORYSA	86.25	1120	1466	1.31	140	162	22
tr|Q01HZ7|Q01HZ7_ORYSA	84.43	49610	43360	0.87	95	108	13
tr|Q01HZ7|Q01HZ7_ORYSA	79.81	11900	9094	0.76	333	346	13
tr|Q01HZ7|Q01HZ7_ORYSA	76.09	19260	15630	0.81	280	293	13
tr|Q01HZ7|Q01HZ7_ORYSA	75.86	614.5	1042	1.69	140	163	23
tr|Q01HZ7|Q01HZ7_ORYSA	75.26	12130	11260	0.93	60	74	14
tr|Q01HZ7|Q01HZ7_ORYSA	75.18	282400	215200	0.76	49	59	10
tr|Q01HZ7|Q01HZ7_ORYSA	74.97	172200	135900	0.79	48	59	11
tr|Q01HZ7|Q01HZ7_ORYSA	74.48	5088	5631	1.11	60	74	14
tr|Q01HZ7|Q01HZ7_ORYSA	70.02	9248	6487	0.7	301	311	10
tr|Q01HZ7|Q01HZ7_ORYSA	69.5	1336	1364	1.02	148	162	14
tr|Q01HZ7|Q01HZ7_ORYSA	68.71	1794	1299	0.72	403	422	19
tr|Q01HZ7|Q01HZ7_ORYSA	68.45	27750	22080	0.8	312	324	12
tr|Q01HZ7|Q01HZ7_ORYSA	68.03	2121	2203	1.04	408	422	14
tr|Q01HZ7|Q01HZ7_ORYSA	66.38	25450	26050	1.02	312	323	11
tr|Q01HZ7|Q01HZ7_ORYSA	65	1862	2029	1.09	148	163	15
tr|Q01HZ7|Q01HZ7_ORYSA	64.95	2916	1774	0.61	60	74	14
tr|Q01HZ7|Q01HZ7_ORYSA	62.92	35310	31410	0.89	166	174	8
tr|Q01HZ7|Q01HZ7_ORYSA	62.78	99890	80430	0.81	315	324	9
tr|Q01HZ7|Q01HZ7_ORYSA	61.95	11320	10640	0.94	182	193	11
tr|Q01HZ7|Q01HZ7_ORYSA	61.85	66640	52820	0.79	315	323	8
tr|Q01HZ7|Q01HZ7_ORYSA	59.07	163600	142600	0.87	226	233	7
tr|Q01HZ7|Q01HZ7_ORYSA	56.07	3655	4410	1.21	280	311	31
tr|Q01HZ7|Q01HZ7_ORYSA	55.92	42030	34980	0.83	381	388	7
tr|Q01HZ7|Q01HZ7_ORYSA	55.42	797.5	356.825	0.45	333	344	11
tr|Q01HZ7|Q01HZ7_ORYSA	54.87	333.5	239.976	0.72	398	422	24
tr|Q01HZ7|Q01HZ7_ORYSA	54.55	2884	2308	0.8	183	193	10
tr|Q01HZ7|Q01HZ7_ORYSA	51.16	326.5	207.142	0.63	76	90	14
tr|Q01HZ7|Q01HZ7_ORYSA	50.18	710.5	593.421	0.84	262	274	12
tr|Q01HZ7|Q01HZ7_ORYSA	50.08	90990	76020	0.84	325	332	7
tr|Q01HZ7|Q01HZ7_ORYSA	49.72	29860	27450	0.92	214	221	7
tr|Q01HZ7|Q01HZ7_ORYSA	48.93	4662	4325	0.93	99	108	9
tr|Q01HZ7|Q01HZ7_ORYSA	48.2	4642	4673	1.01	312	324	12
tr|Q01HZ7|Q01HZ7_ORYSA	47.6	2528	2145	0.85	46	59	13
tr|Q01HZ7|Q01HZ7_ORYSA	45.67	36170	18470	0.51	373	380	7
tr|Q01HZ7|Q01HZ7_ORYSA	45.26	2384	2256	0.95	401	422	21
tr|Q01HZ7|Q01HZ7_ORYSA	44.88	2428	1417	0.58	80	90	10
tr|Q01HZ7|Q01HZ7_ORYSA	43.93	9470	7830	0.83	324	332	8
tr|Q01HZ7|Q01HZ7_ORYSA	43.55	480.5	436.012	0.91	144	163	19
tr|Q01HZ7|Q01HZ7_ORYSA	43.06	1740	1767	1.02	356	367	11
tr|Q01HZ7|Q01HZ7_ORYSA	41.15	3954	3385	0.86	312	323	11
tr|Q01HZ7|Q01HZ7_ORYSA	39.03	438.5	211.005	0.48	140	162	22
tr|Q01HZ7|Q01HZ7_ORYSA	38.62	511.5	329.785	0.64	149	162	13
tr|Q01HZ7|Q01HZ7_ORYSA	36.66	2800	2549	0.91	389	402	13
tr|Q01HZ7|Q01HZ7_ORYSA	36.12	233.5	109.607	0.47	175	186	11
tr|Q01HZ7|Q01HZ7_ORYSA	35.66	135.5	144.372	1.07	348	359	11
tr|Q01HZ7|Q01HZ7_ORYSA	34.99	226.5	139.543	0.62	389	407	18
tr|Q01HZ7|Q01HZ7_ORYSA	31.69	1678	1759	1.05	289	311	22
tr|Q01HZ7|Q01HZ7_ORYSA	30.1	1044	856.09	0.82	348	360	12
tr|Q01HZ7|Q01HZ7_ORYSA	29.37	1235	396.901	0.32	166	172	6
tr|Q01HZ7|Q01HZ7_ORYSA	27.83	697	0	0	348	366	18
tr|Q01HZ7|Q01HZ7_ORYSA	26.72	1508	554.31	0.37	175	182	7
tr|Q01HZ7|Q01HZ7_ORYSA	22.5	622.5	287.295	0.46	175	181	6
tr|Q01HZ7|Q01HZ7_ORYSA	22.14	479.5	125.058	0.26	348	362	14
P14655|GLNA2_ORYSJ	107.97	38330	35580	0.93	294	311	17
P14655|GLNA2_ORYSJ	102.89	31450	26790	0.85	75	90	15
P14655|GLNA2_ORYSJ	102.84	3506	2528	0.72	348	367	19
P14655|GLNA2_ORYSJ	102.17	410.5	155.96	0.38	194	221	27
P14655|GLNA2_ORYSJ	95.23	5570	5833	1.05	175	193	18
P14655|GLNA2_ORYSJ	94.98	4156	2534	0.61	257	274	17
P14655|GLNA2_ORYSJ	93.13	87900	69440	0.79	60	74	14
P14655|GLNA2_ORYSJ	91.2	1959	1637	0.84	140	163	23
P14655|GLNA2_ORYSJ	86.25	1120	1466	1.31	140	162	22
P14655|GLNA2_ORYSJ	84.43	49610	43360	0.87	95	108	13
P14655|GLNA2_ORYSJ	79.81	11900	9094	0.76	333	346	13
P14655|GLNA2_ORYSJ	76.09	19260	15630	0.81	280	293	13
P14655|GLNA2_ORYSJ	75.86	614.5	1042	1.69	140	163	23
P14655|GLNA2_ORYSJ	75.26	12130	11260	0.93	60	74	14
P14655|GLNA2_ORYSJ	75.18	282400	215200	0.76	49	59	10
P14655|GLNA2_ORYSJ	74.97	172200	135900	0.79	48	59	11
P14655|GLNA2_ORYSJ	74.48	5088	5631	1.11	60	74	14
P14655|GLNA2_ORYSJ	70.02	9248	6487	0.7	301	311	10
P14655|GLNA2_ORYSJ	69.5	1336	1364	1.02	148	162	14
P14655|GLNA2_ORYSJ	68.71	1794	1299	0.72	403	422	19
P14655|GLNA2_ORYSJ	68.45	27750	22080	0.8	312	324	12
P14655|GLNA2_ORYSJ	68.03	2121	2203	1.04	408	422	14
P14655|GLNA2_ORYSJ	66.38	25450	26050	1.02	312	323	11
P14655|GLNA2_ORYSJ	65	1862	2029	1.09	148	163	15
P14655|GLNA2_ORYSJ	64.95	2916	1774	0.61	60	74	14
P14655|GLNA2_ORYSJ	62.92	35310	31410	0.89	166	174	8
P14655|GLNA2_ORYSJ	62.78	99890	80430	0.81	315	324	9
P14655|GLNA2_ORYSJ	61.95	11320	10640	0.94	182	193	11
P14655|GLNA2_ORYSJ	61.85	66640	52820	0.79	315	323	8
P14655|GLNA2_ORYSJ	59.07	163600	142600	0.87	226	233	7
P14655|GLNA2_ORYSJ	56.07	3655	4410	1.21	280	311	31
P14655|GLNA2_ORYSJ	55.92	42030	34980	0.83	381	388	7
P14655|GLNA2_ORYSJ	55.42	797.5	356.825	0.45	333	344	11
P14655|GLNA2_ORYSJ	54.87	333.5	239.976	0.72	398	422	24
P14655|GLNA2_ORYSJ	54.55	2884	2308	0.8	183	193	10
P14655|GLNA2_ORYSJ	51.16	326.5	207.142	0.63	76	90	14
P14655|GLNA2_ORYSJ	50.18	710.5	593.421	0.84	262	274	12
P14655|GLNA2_ORYSJ	50.08	90990	76020	0.84	325	332	7
P14655|GLNA2_ORYSJ	49.72	29860	27450	0.92	214	221	7
P14655|GLNA2_ORYSJ	48.93	4662	4325	0.93	99	108	9
P14655|GLNA2_ORYSJ	48.2	4642	4673	1.01	312	324	12
P14655|GLNA2_ORYSJ	47.6	2528	2145	0.85	46	59	13
P14655|GLNA2_ORYSJ	45.67	36170	18470	0.51	373	380	7
P14655|GLNA2_ORYSJ	45.26	2384	2256	0.95	401	422	21
P14655|GLNA2_ORYSJ	44.88	2428	1417	0.58	80	90	10
P14655|GLNA2_ORYSJ	43.93	9470	7830	0.83	324	332	8
P14655|GLNA2_ORYSJ	43.55	480.5	436.012	0.91	144	163	19
P14655|GLNA2_ORYSJ	43.06	1740	1767	1.02	356	367	11
P14655|GLNA2_ORYSJ	41.15	3954	3385	0.86	312	323	11
P14655|GLNA2_ORYSJ	39.03	438.5	211.005	0.48	140	162	22
P14655|GLNA2_ORYSJ	38.62	511.5	329.785	0.64	149	162	13
P14655|GLNA2_ORYSJ	36.66	2800	2549	0.91	389	402	13
P14655|GLNA2_ORYSJ	36.12	233.5	109.607	0.47	175	186	11
P14655|GLNA2_ORYSJ	35.66	135.5	144.372	1.07	348	359	11
P14655|GLNA2_ORYSJ	34.99	226.5	139.543	0.62	389	407	18
P14655|GLNA2_ORYSJ	31.69	1678	1759	1.05	289	311	22
P14655|GLNA2_ORYSJ	30.1	1044	856.09	0.82	348	360	12
P14655|GLNA2_ORYSJ	29.37	1235	396.901	0.32	166	172	6
P14655|GLNA2_ORYSJ	27.83	697	0	0	348	366	18
P14655|GLNA2_ORYSJ	26.72	1508	554.31	0.37	175	182	7
P14655|GLNA2_ORYSJ	22.5	622.5	287.295	0.46	175	181	6
P14655|GLNA2_ORYSJ	22.14	479.5	125.058	0.26	348	362	14
tr|A0A0E0H6Y4|A0A0E0H6Y4_ORYNI	107.97	38330	35580	0.93	292	309	17
tr|A0A0E0H6Y4|A0A0E0H6Y4_ORYNI	102.89	31450	26790	0.85	73	88	15
tr|A0A0E0H6Y4|A0A0E0H6Y4_ORYNI	102.84	3506	2528	0.72	346	365	19
tr|A0A0E0H6Y4|A0A0E0H6Y4_ORYNI	102.17	410.5	155.96	0.38	192	219	27
tr|A0A0E0H6Y4|A0A0E0H6Y4_ORYNI	95.23	5570	5833	1.05	173	191	18
tr|A0A0E0H6Y4|A0A0E0H6Y4_ORYNI	94.98	4156	2534	0.61	255	272	17
tr|A0A0E0H6Y4|A0A0E0H6Y4_ORYNI	93.13	87900	69440	0.79	58	72	14
tr|A0A0E0H6Y4|A0A0E0H6Y4_ORYNI	91.2	1959	1637	0.84	138	161	23
tr|A0A0E0H6Y4|A0A0E0H6Y4_ORYNI	86.25	1120	1466	1.31	138	160	22
tr|A0A0E0H6Y4|A0A0E0H6Y4_ORYNI	84.43	49610	43360	0.87	93	106	13
tr|A0A0E0H6Y4|A0A0E0H6Y4_ORYNI	79.81	11900	9094	0.76	331	344	13
tr|A0A0E0H6Y4|A0A0E0H6Y4_ORYNI	76.09	19260	15630	0.81	278	291	13
tr|A0A0E0H6Y4|A0A0E0H6Y4_ORYNI	75.86	614.5	1042	1.69	138	161	23
tr|A0A0E0H6Y4|A0A0E0H6Y4_ORYNI	75.26	12130	11260	0.93	58	72	14
tr|A0A0E0H6Y4|A0A0E0H6Y4_ORYNI	75.18	282400	215200	0.76	47	57	10
tr|A0A0E0H6Y4|A0A0E0H6Y4_ORYNI	74.97	172200	135900	0.79	46	57	11
tr|A0A0E0H6Y4|A0A0E0H6Y4_ORYNI	74.48	5088	5631	1.11	58	72	14
tr|A0A0E0H6Y4|A0A0E0H6Y4_ORYNI	70.02	9248	6487	0.7	299	309	10
tr|A0A0E0H6Y4|A0A0E0H6Y4_ORYNI	69.5	1336	1364	1.02	146	160	14
tr|A0A0E0H6Y4|A0A0E0H6Y4_ORYNI	68.71	1794	1299	0.72	401	420	19
tr|A0A0E0H6Y4|A0A0E0H6Y4_ORYNI	68.45	27750	22080	0.8	310	322	12
tr|A0A0E0H6Y4|A0A0E0H6Y4_ORYNI	68.03	2121	2203	1.04	406	420	14
tr|A0A0E0H6Y4|A0A0E0H6Y4_ORYNI	66.38	25450	26050	1.02	310	321	11
tr|A0A0E0H6Y4|A0A0E0H6Y4_ORYNI	65	1862	2029	1.09	146	161	15
tr|A0A0E0H6Y4|A0A0E0H6Y4_ORYNI	64.95	2916	1774	0.61	58	72	14
tr|A0A0E0H6Y4|A0A0E0H6Y4_ORYNI	62.92	35310	31410	0.89	164	172	8
tr|A0A0E0H6Y4|A0A0E0H6Y4_ORYNI	62.78	99890	80430	0.81	313	322	9
tr|A0A0E0H6Y4|A0A0E0H6Y4_ORYNI	61.95	11320	10640	0.94	180	191	11
tr|A0A0E0H6Y4|A0A0E0H6Y4_ORYNI	61.85	66640	52820	0.79	313	321	8
tr|A0A0E0H6Y4|A0A0E0H6Y4_ORYNI	59.07	163600	142600	0.87	224	231	7
tr|A0A0E0H6Y4|A0A0E0H6Y4_ORYNI	56.07	3655	4410	1.21	278	309	31
tr|A0A0E0H6Y4|A0A0E0H6Y4_ORYNI	55.92	42030	34980	0.83	379	386	7
tr|A0A0E0H6Y4|A0A0E0H6Y4_ORYNI	55.42	797.5	356.825	0.45	331	342	11
tr|A0A0E0H6Y4|A0A0E0H6Y4_ORYNI	54.87	333.5	239.976	0.72	396	420	24
tr|A0A0E0H6Y4|A0A0E0H6Y4_ORYNI	54.55	2884	2308	0.8	181	191	10
tr|A0A0E0H6Y4|A0A0E0H6Y4_ORYNI	51.16	326.5	207.142	0.63	74	88	14
tr|A0A0E0H6Y4|A0A0E0H6Y4_ORYNI	50.18	710.5	593.421	0.84	260	272	12
tr|A0A0E0H6Y4|A0A0E0H6Y4_ORYNI	50.08	90990	76020	0.84	323	330	7
tr|A0A0E0H6Y4|A0A0E0H6Y4_ORYNI	49.72	29860	27450	0.92	212	219	7
tr|A0A0E0H6Y4|A0A0E0H6Y4_ORYNI	48.93	4662	4325	0.93	97	106	9
tr|A0A0E0H6Y4|A0A0E0H6Y4_ORYNI	48.2	4642	4673	1.01	310	322	12
tr|A0A0E0H6Y4|A0A0E0H6Y4_ORYNI	47.6	2528	2145	0.85	44	57	13
tr|A0A0E0H6Y4|A0A0E0H6Y4_ORYNI	45.67	36170	18470	0.51	371	378	7
tr|A0A0E0H6Y4|A0A0E0H6Y4_ORYNI	45.26	2384	2256	0.95	399	420	21
tr|A0A0E0H6Y4|A0A0E0H6Y4_ORYNI	44.88	2428	1417	0.58	78	88	10
tr|A0A0E0H6Y4|A0A0E0H6Y4_ORYNI	43.93	9470	7830	0.83	322	330	8
tr|A0A0E0H6Y4|A0A0E0H6Y4_ORYNI	43.55	480.5	436.012	0.91	142	161	19
tr|A0A0E0H6Y4|A0A0E0H6Y4_ORYNI	43.06	1740	1767	1.02	354	365	11
tr|A0A0E0H6Y4|A0A0E0H6Y4_ORYNI	41.15	3954	3385	0.86	310	321	11
tr|A0A0E0H6Y4|A0A0E0H6Y4_ORYNI	39.03	438.5	211.005	0.48	138	160	22
tr|A0A0E0H6Y4|A0A0E0H6Y4_ORYNI	38.62	511.5	329.785	0.64	147	160	13
tr|A0A0E0H6Y4|A0A0E0H6Y4_ORYNI	36.66	2800	2549	0.91	387	400	13
tr|A0A0E0H6Y4|A0A0E0H6Y4_ORYNI	36.12	233.5	109.607	0.47	173	184	11
tr|A0A0E0H6Y4|A0A0E0H6Y4_ORYNI	35.66	135.5	144.372	1.07	346	357	11
tr|A0A0E0H6Y4|A0A0E0H6Y4_ORYNI	34.99	226.5	139.543	0.62	387	405	18
tr|A0A0E0H6Y4|A0A0E0H6Y4_ORYNI	31.69	1678	1759	1.05	287	309	22
tr|A0A0E0H6Y4|A0A0E0H6Y4_ORYNI	30.1	1044	856.09	0.82	346	358	12
tr|A0A0E0H6Y4|A0A0E0H6Y4_ORYNI	29.37	1235	396.901	0.32	164	170	6
tr|A0A0E0H6Y4|A0A0E0H6Y4_ORYNI	27.83	697	0	0	346	364	18
tr|A0A0E0H6Y4|A0A0E0H6Y4_ORYNI	26.72	1508	554.31	0.37	173	180	7
tr|A0A0E0H6Y4|A0A0E0H6Y4_ORYNI	22.5	622.5	287.295	0.46	173	179	6
tr|A0A0E0H6Y4|A0A0E0H6Y4_ORYNI	22.14	479.5	125.058	0.26	346	360	14
tr|Q7FSG3|Q7FSG3_ORYSA	114.68	5620	5766	1.03	223	240	17
tr|Q7FSG3|Q7FSG3_ORYSA	105.07	9274	9141	0.99	286	304	18
tr|Q7FSG3|Q7FSG3_ORYSA	98.18	7739	7400	0.96	87	105	18
tr|Q7FSG3|Q7FSG3_ORYSA	97.09	2724	2353	0.86	115	137	22
tr|Q7FSG3|Q7FSG3_ORYSA	91.12	12310	12600	1.02	260	275	15
tr|Q7FSG3|Q7FSG3_ORYSA	91.07	10070	11890	1.18	138	153	15
tr|Q7FSG3|Q7FSG3_ORYSA	90.6	24000	20890	0.87	10	25	15
tr|Q7FSG3|Q7FSG3_ORYSA	88.75	48210	36820	0.76	551	565	14
tr|Q7FSG3|Q7FSG3_ORYSA	86.65	9832	7395	0.75	289	304	15
tr|Q7FSG3|Q7FSG3_ORYSA	86.17	2266	1994	0.88	312	339	27
tr|Q7FSG3|Q7FSG3_ORYSA	84.31	48100	39110	0.81	344	356	12
tr|Q7FSG3|Q7FSG3_ORYSA	83.97	2152	2331	1.08	138	153	15
tr|Q7FSG3|Q7FSG3_ORYSA	83.34	103700	89310	0.86	447	458	11
tr|Q7FSG3|Q7FSG3_ORYSA	81.17	3918	3511	0.9	459	476	17
tr|Q7FSG3|Q7FSG3_ORYSA	80.79	35690	33860	0.95	55	65	10
tr|Q7FSG3|Q7FSG3_ORYSA	79.61	11720	11930	1.02	241	259	18
tr|Q7FSG3|Q7FSG3_ORYSA	79.06	15900	15110	0.95	344	356	12
tr|Q7FSG3|Q7FSG3_ORYSA	73.41	42340	33360	0.79	207	216	9
tr|Q7FSG3|Q7FSG3_ORYSA	67.25	359.5	323.025	0.9	459	476	17
tr|Q7FSG3|Q7FSG3_ORYSA	66.61	673.5	437.943	0.65	483	506	23
tr|Q7FSG3|Q7FSG3_ORYSA	65.07	7017	5778	0.82	524	535	11
tr|Q7FSG3|Q7FSG3_ORYSA	64.72	55970	49190	0.88	425	433	8
tr|Q7FSG3|Q7FSG3_ORYSA	62.83	665	577.487	0.87	87	105	18
tr|Q7FSG3|Q7FSG3_ORYSA	62.26	5964	5122	0.86	93	105	12
tr|Q7FSG3|Q7FSG3_ORYSA	61.82	1393	929	0.67	418	433	15
tr|Q7FSG3|Q7FSG3_ORYSA	60.84	71960	65250	0.91	536	543	7
tr|Q7FSG3|Q7FSG3_ORYSA	59.56	14700	13420	0.91	207	215	8
tr|Q7FSG3|Q7FSG3_ORYSA	57.36	27890	28190	1.01	70	77	7
tr|Q7FSG3|Q7FSG3_ORYSA	57.01	5292	7266	1.37	468	476	8
tr|Q7FSG3|Q7FSG3_ORYSA	56.28	2388	2938	1.23	327	339	12
tr|Q7FSG3|Q7FSG3_ORYSA	55.37	517	573.624	1.11	483	497	14
tr|Q7FSG3|Q7FSG3_ORYSA	55.31	28790	26010	0.9	416	424	8
tr|Q7FSG3|Q7FSG3_ORYSA	54.96	9423	9632	1.02	28	35	7
tr|Q7FSG3|Q7FSG3_ORYSA	54.88	3429	3896	1.14	9	25	16
tr|Q7FSG3|Q7FSG3_ORYSA	54.67	635.5	585.695	0.92	464	476	12
tr|Q7FSG3|Q7FSG3_ORYSA	54.19	721.5	363.585	0.5	36	52	16
tr|Q7FSG3|Q7FSG3_ORYSA	53.71	257.5	164.651	0.64	375	397	22
tr|Q7FSG3|Q7FSG3_ORYSA	53.23	19310	19680	1.02	512	519	7
tr|Q7FSG3|Q7FSG3_ORYSA	52.81	2174	1043	0.48	286	310	24
tr|Q7FSG3|Q7FSG3_ORYSA	51.56	1541	917.412	0.6	120	137	17
tr|Q7FSG3|Q7FSG3_ORYSA	51.11	566	750.346	1.33	260	270	10
tr|Q7FSG3|Q7FSG3_ORYSA	48.86	513.5	132.783	0.26	66	77	11
tr|Q7FSG3|Q7FSG3_ORYSA	48.26	245.5	402.213	1.64	286	311	25
tr|Q7FSG3|Q7FSG3_ORYSA	48.18	23280	24460	1.05	569	575	6
tr|Q7FSG3|Q7FSG3_ORYSA	47.13	1891	1912	1.01	184	203	19
tr|Q7FSG3|Q7FSG3_ORYSA	44.75	2176	2055	0.94	576	582	6
tr|Q7FSG3|Q7FSG3_ORYSA	44.74	1156	1224	1.06	434	441	7
tr|Q7FSG3|Q7FSG3_ORYSA	44.22	6002	6663	1.11	10	18	8
tr|Q7FSG3|Q7FSG3_ORYSA	40.41	10550	12540	1.19	418	424	6
tr|Q7FSG3|Q7FSG3_ORYSA	39.74	2804	2622	0.94	27	35	8
tr|Q7FSG3|Q7FSG3_ORYSA	37.72	11920	12650	1.06	78	85	7
tr|Q7FSG3|Q7FSG3_ORYSA	33.82	338	320.128	0.95	241	255	14
tr|Q7FSG3|Q7FSG3_ORYSA	31.56	1299	828.568	0.64	459	467	8
tr|Q7FSG3|Q7FSG3_ORYSA	31.39	3308	2407	0.73	2	9	7
tr|Q7FSG3|Q7FSG3_ORYSA	30.7	9786	9184	0.94	569	575	6
tr|Q7FSG3|Q7FSG3_ORYSA	28.43	1778	2378	1.34	9	18	9
tr|Q7FSG3|Q7FSG3_ORYSA	28.26	868.5	1027	1.18	216	222	6
tr|Q7FSG3|Q7FSG3_ORYSA	28.07	477.5	782.697	1.64	78	85	7
tr|Q7FSG3|Q7FSG3_ORYSA	26.42	351	458.706	1.31	40	52	12
tr|Q7FSG3|Q7FSG3_ORYSA	24.9	1526	569.278	0.37	289	310	21
tr|Q9AUQ4|Q9AUQ4_ORYSJ	114.68	5620	5766	1.03	223	240	17
tr|Q9AUQ4|Q9AUQ4_ORYSJ	105.07	9274	9141	0.99	286	304	18
tr|Q9AUQ4|Q9AUQ4_ORYSJ	98.18	7739	7400	0.96	87	105	18
tr|Q9AUQ4|Q9AUQ4_ORYSJ	97.09	2724	2353	0.86	115	137	22
tr|Q9AUQ4|Q9AUQ4_ORYSJ	91.12	12310	12600	1.02	260	275	15
tr|Q9AUQ4|Q9AUQ4_ORYSJ	91.07	10070	11890	1.18	138	153	15
tr|Q9AUQ4|Q9AUQ4_ORYSJ	90.6	24000	20890	0.87	10	25	15
tr|Q9AUQ4|Q9AUQ4_ORYSJ	88.75	48210	36820	0.76	551	565	14
tr|Q9AUQ4|Q9AUQ4_ORYSJ	86.65	9832	7395	0.75	289	304	15
tr|Q9AUQ4|Q9AUQ4_ORYSJ	86.17	2266	1994	0.88	312	339	27
tr|Q9AUQ4|Q9AUQ4_ORYSJ	84.31	48100	39110	0.81	344	356	12
tr|Q9AUQ4|Q9AUQ4_ORYSJ	83.97	2152	2331	1.08	138	153	15
tr|Q9AUQ4|Q9AUQ4_ORYSJ	83.34	103700	89310	0.86	447	458	11
tr|Q9AUQ4|Q9AUQ4_ORYSJ	81.17	3918	3511	0.9	459	476	17
tr|Q9AUQ4|Q9AUQ4_ORYSJ	80.79	35690	33860	0.95	55	65	10
tr|Q9AUQ4|Q9AUQ4_ORYSJ	79.61	11720	11930	1.02	241	259	18
tr|Q9AUQ4|Q9AUQ4_ORYSJ	79.06	15900	15110	0.95	344	356	12
tr|Q9AUQ4|Q9AUQ4_ORYSJ	73.41	42340	33360	0.79	207	216	9
tr|Q9AUQ4|Q9AUQ4_ORYSJ	67.25	359.5	323.025	0.9	459	476	17
tr|Q9AUQ4|Q9AUQ4_ORYSJ	66.61	673.5	437.943	0.65	483	506	23
tr|Q9AUQ4|Q9AUQ4_ORYSJ	65.07	7017	5778	0.82	524	535	11
tr|Q9AUQ4|Q9AUQ4_ORYSJ	64.72	55970	49190	0.88	425	433	8
tr|Q9AUQ4|Q9AUQ4_ORYSJ	62.83	665	577.487	0.87	87	105	18
tr|Q9AUQ4|Q9AUQ4_ORYSJ	62.26	5964	5122	0.86	93	105	12
tr|Q9AUQ4|Q9AUQ4_ORYSJ	61.82	1393	929	0.67	418	433	15
tr|Q9AUQ4|Q9AUQ4_ORYSJ	60.84	71960	65250	0.91	536	543	7
tr|Q9AUQ4|Q9AUQ4_ORYSJ	59.56	14700	13420	0.91	207	215	8
tr|Q9AUQ4|Q9AUQ4_ORYSJ	57.36	27890	28190	1.01	70	77	7
tr|Q9AUQ4|Q9AUQ4_ORYSJ	57.01	5292	7266	1.37	468	476	8
tr|Q9AUQ4|Q9AUQ4_ORYSJ	56.28	2388	2938	1.23	327	339	12
tr|Q9AUQ4|Q9AUQ4_ORYSJ	55.37	517	573.624	1.11	483	497	14
tr|Q9AUQ4|Q9AUQ4_ORYSJ	55.31	28790	26010	0.9	416	424	8
tr|Q9AUQ4|Q9AUQ4_ORYSJ	54.96	9423	9632	1.02	28	35	7
tr|Q9AUQ4|Q9AUQ4_ORYSJ	54.88	3429	3896	1.14	9	25	16
tr|Q9AUQ4|Q9AUQ4_ORYSJ	54.67	635.5	585.695	0.92	464	476	12
tr|Q9AUQ4|Q9AUQ4_ORYSJ	54.19	721.5	363.585	0.5	36	52	16
tr|Q9AUQ4|Q9AUQ4_ORYSJ	53.71	257.5	164.651	0.64	375	397	22
tr|Q9AUQ4|Q9AUQ4_ORYSJ	53.23	19310	19680	1.02	512	519	7
tr|Q9AUQ4|Q9AUQ4_ORYSJ	52.81	2174	1043	0.48	286	310	24
tr|Q9AUQ4|Q9AUQ4_ORYSJ	51.56	1541	917.412	0.6	120	137	17
tr|Q9AUQ4|Q9AUQ4_ORYSJ	51.11	566	750.346	1.33	260	270	10
tr|Q9AUQ4|Q9AUQ4_ORYSJ	48.86	513.5	132.783	0.26	66	77	11
tr|Q9AUQ4|Q9AUQ4_ORYSJ	48.26	245.5	402.213	1.64	286	311	25
tr|Q9AUQ4|Q9AUQ4_ORYSJ	48.18	23280	24460	1.05	569	575	6
tr|Q9AUQ4|Q9AUQ4_ORYSJ	47.13	1891	1912	1.01	184	203	19
tr|Q9AUQ4|Q9AUQ4_ORYSJ	44.75	2176	2055	0.94	576	582	6
tr|Q9AUQ4|Q9AUQ4_ORYSJ	44.74	1156	1224	1.06	434	441	7
tr|Q9AUQ4|Q9AUQ4_ORYSJ	44.22	6002	6663	1.11	10	18	8
tr|Q9AUQ4|Q9AUQ4_ORYSJ	40.41	10550	12540	1.19	418	424	6
tr|Q9AUQ4|Q9AUQ4_ORYSJ	39.74	2804	2622	0.94	27	35	8
tr|Q9AUQ4|Q9AUQ4_ORYSJ	37.72	11920	12650	1.06	78	85	7
tr|Q9AUQ4|Q9AUQ4_ORYSJ	33.82	338	320.128	0.95	241	255	14
tr|Q9AUQ4|Q9AUQ4_ORYSJ	31.56	1299	828.568	0.64	459	467	8
tr|Q9AUQ4|Q9AUQ4_ORYSJ	31.39	3308	2407	0.73	2	9	7
tr|Q9AUQ4|Q9AUQ4_ORYSJ	30.7	9786	9184	0.94	569	575	6
tr|Q9AUQ4|Q9AUQ4_ORYSJ	28.43	1778	2378	1.34	9	18	9
tr|Q9AUQ4|Q9AUQ4_ORYSJ	28.26	868.5	1027	1.18	216	222	6
tr|Q9AUQ4|Q9AUQ4_ORYSJ	28.07	477.5	782.697	1.64	78	85	7
tr|Q9AUQ4|Q9AUQ4_ORYSJ	26.42	351	458.706	1.31	40	52	12
tr|Q9AUQ4|Q9AUQ4_ORYSJ	24.9	1526	569.278	0.37	289	310	21
Q6ZFJ3|FENR2_ORYSJ	77.16	32170	28980	0.9	236	245	9
tr|A0A0E0HK09|A0A0E0HK09_ORYNI	112.33	1089	880.715	0.81	584	601	17
tr|A0A0E0HK09|A0A0E0HK09_ORYNI	108.29	781	574.589	0.74	584	601	17
tr|A0A0E0HK09|A0A0E0HK09_ORYNI	101.16	8612	8754	1.02	383	399	16
tr|A0A0E0HK09|A0A0E0HK09_ORYNI	95.23	29230	33100	1.13	383	400	17
tr|A0A0E0HK09|A0A0E0HK09_ORYNI	91.6	12120	12900	1.07	237	252	15
tr|A0A0E0HK09|A0A0E0HK09_ORYNI	90.07	22110	20590	0.93	137	161	24
tr|A0A0E0HK09|A0A0E0HK09_ORYNI	85.36	17670	18870	1.07	481	494	13
tr|A0A0E0HK09|A0A0E0HK09_ORYNI	83.47	383.5	338.477	0.88	340	357	17
tr|A0A0E0HK09|A0A0E0HK09_ORYNI	83.06	8836	7620	0.86	341	357	16
tr|A0A0E0HK09|A0A0E0HK09_ORYNI	81.91	5425	3962	0.73	427	445	18
tr|A0A0E0HK09|A0A0E0HK09_ORYNI	81.57	732	434.563	0.59	298	321	23
tr|A0A0E0HK09|A0A0E0HK09_ORYNI	80.2	23650	24120	1.02	406	419	13
tr|A0A0E0HK09|A0A0E0HK09_ORYNI	77.66	2608	2479	0.95	571	583	12
tr|A0A0E0HK09|A0A0E0HK09_ORYNI	76.56	11120	11040	0.99	406	417	11
tr|A0A0E0HK09|A0A0E0HK09_ORYNI	75.87	3648	4246	1.16	237	252	15
tr|A0A0E0HK09|A0A0E0HK09_ORYNI	75.56	2776	2069	0.75	139	161	22
tr|A0A0E0HK09|A0A0E0HK09_ORYNI	74.85	1451	987.908	0.68	534	556	22
tr|A0A0E0HK09|A0A0E0HK09_ORYNI	74.48	43880	55360	1.26	266	274	8
tr|A0A0E0HK09|A0A0E0HK09_ORYNI	70.91	1166	1157	0.99	427	447	20
tr|A0A0E0HK09|A0A0E0HK09_ORYNI	69.66	16820	11790	0.7	287	297	10
tr|A0A0E0HK09|A0A0E0HK09_ORYNI	69.6	49010	41450	0.85	105	114	9
tr|A0A0E0HK09|A0A0E0HK09_ORYNI	65.96	13230	15770	1.19	228	236	8
tr|A0A0E0HK09|A0A0E0HK09_ORYNI	65.01	895.5	831.948	0.93	534	556	22
tr|A0A0E0HK09|A0A0E0HK09_ORYNI	63.99	18590	18660	1	486	494	8
tr|A0A0E0HK09|A0A0E0HK09_ORYNI	60.54	30910	37810	1.22	227	236	9
tr|A0A0E0HK09|A0A0E0HK09_ORYNI	59.96	11260	14770	1.31	358	366	8
tr|A0A0E0HK09|A0A0E0HK09_ORYNI	56.66	6020	7393	1.23	266	274	8
tr|A0A0E0HK09|A0A0E0HK09_ORYNI	56.05	325.5	130.852	0.4	378	400	22
tr|A0A0E0HK09|A0A0E0HK09_ORYNI	54.99	29690	29640	1	71	78	7
tr|A0A0E0HK09|A0A0E0HK09_ORYNI	54.52	21670	22010	1.02	526	533	7
tr|A0A0E0HK09|A0A0E0HK09_ORYNI	54.18	14360	16910	1.18	370	377	7
tr|A0A0E0HK09|A0A0E0HK09_ORYNI	51.63	55590	62140	1.12	182	189	7
tr|A0A0E0HK09|A0A0E0HK09_ORYNI	48.02	1666	1243	0.75	481	501	20
tr|A0A0E0HK09|A0A0E0HK09_ORYNI	43.95	297.5	555.758	1.87	341	366	25
tr|A0A0E0HK09|A0A0E0HK09_ORYNI	42.33	13210	13750	1.04	72	78	6
tr|A0A0E0HK09|A0A0E0HK09_ORYNI	34.98	402.5	308.54	0.77	538	556	18
tr|A0A0E0HK09|A0A0E0HK09_ORYNI	34.85	2156	1958	0.91	182	188	6
tr|A0A0E0HK09|A0A0E0HK09_ORYNI	32.86	361.5	180.102	0.5	367	377	10
tr|A0A0E0HK09|A0A0E0HK09_ORYNI	30.48	767.5	711.235	0.93	407	419	12
tr|A0A0E0HK09|A0A0E0HK09_ORYNI	28.86	6246	7178	1.15	65	71	6
tr|A0A0E0HK09|A0A0E0HK09_ORYNI	26.2	5730	5204	0.91	503	509	6
tr|A0A0E0HK09|A0A0E0HK09_ORYNI	25.62	690.5	865.747	1.25	216	223	7
tr|A0A0E0HK09|A0A0E0HK09_ORYNI	22.75	1410	1547	1.1	241	252	11
tr|Q9LWT6|Q9LWT6_ORYSJ	112.33	1089	880.715	0.81	584	601	17
tr|Q9LWT6|Q9LWT6_ORYSJ	108.29	781	574.589	0.74	584	601	17
tr|Q9LWT6|Q9LWT6_ORYSJ	101.16	8612	8754	1.02	383	399	16
tr|Q9LWT6|Q9LWT6_ORYSJ	95.23	29230	33100	1.13	383	400	17
tr|Q9LWT6|Q9LWT6_ORYSJ	91.6	12120	12900	1.07	237	252	15
tr|Q9LWT6|Q9LWT6_ORYSJ	90.07	22110	20590	0.93	137	161	24
tr|Q9LWT6|Q9LWT6_ORYSJ	85.36	17670	18870	1.07	481	494	13
tr|Q9LWT6|Q9LWT6_ORYSJ	83.47	383.5	338.477	0.88	340	357	17
tr|Q9LWT6|Q9LWT6_ORYSJ	83.06	8836	7620	0.86	341	357	16
tr|Q9LWT6|Q9LWT6_ORYSJ	81.91	5425	3962	0.73	427	445	18
tr|Q9LWT6|Q9LWT6_ORYSJ	81.57	732	434.563	0.59	298	321	23
tr|Q9LWT6|Q9LWT6_ORYSJ	80.2	23650	24120	1.02	406	419	13
tr|Q9LWT6|Q9LWT6_ORYSJ	77.66	2608	2479	0.95	571	583	12
tr|Q9LWT6|Q9LWT6_ORYSJ	76.56	11120	11040	0.99	406	417	11
tr|Q9LWT6|Q9LWT6_ORYSJ	75.87	3648	4246	1.16	237	252	15
tr|Q9LWT6|Q9LWT6_ORYSJ	75.56	2776	2069	0.75	139	161	22
tr|Q9LWT6|Q9LWT6_ORYSJ	74.85	1451	987.908	0.68	534	556	22
tr|Q9LWT6|Q9LWT6_ORYSJ	74.48	43880	55360	1.26	266	274	8
tr|Q9LWT6|Q9LWT6_ORYSJ	70.91	1166	1157	0.99	427	447	20
tr|Q9LWT6|Q9LWT6_ORYSJ	69.66	16820	11790	0.7	287	297	10
tr|Q9LWT6|Q9LWT6_ORYSJ	69.6	49010	41450	0.85	105	114	9
tr|Q9LWT6|Q9LWT6_ORYSJ	65.96	13230	15770	1.19	228	236	8
tr|Q9LWT6|Q9LWT6_ORYSJ	65.01	895.5	831.948	0.93	534	556	22
tr|Q9LWT6|Q9LWT6_ORYSJ	63.99	18590	18660	1	486	494	8
tr|Q9LWT6|Q9LWT6_ORYSJ	60.54	30910	37810	1.22	227	236	9
tr|Q9LWT6|Q9LWT6_ORYSJ	59.96	11260	14770	1.31	358	366	8
tr|Q9LWT6|Q9LWT6_ORYSJ	56.66	6020	7393	1.23	266	274	8
tr|Q9LWT6|Q9LWT6_ORYSJ	56.05	325.5	130.852	0.4	378	400	22
tr|Q9LWT6|Q9LWT6_ORYSJ	54.99	29690	29640	1	71	78	7
tr|Q9LWT6|Q9LWT6_ORYSJ	54.52	21670	22010	1.02	526	533	7
tr|Q9LWT6|Q9LWT6_ORYSJ	54.18	14360	16910	1.18	370	377	7
tr|Q9LWT6|Q9LWT6_ORYSJ	51.63	55590	62140	1.12	182	189	7
tr|Q9LWT6|Q9LWT6_ORYSJ	48.02	1666	1243	0.75	481	501	20
tr|Q9LWT6|Q9LWT6_ORYSJ	43.95	297.5	555.758	1.87	341	366	25
tr|Q9LWT6|Q9LWT6_ORYSJ	42.33	13210	13750	1.04	72	78	6
tr|Q9LWT6|Q9LWT6_ORYSJ	34.98	402.5	308.54	0.77	538	556	18
tr|Q9LWT6|Q9LWT6_ORYSJ	34.85	2156	1958	0.91	182	188	6
tr|Q9LWT6|Q9LWT6_ORYSJ	32.86	361.5	180.102	0.5	367	377	10
tr|Q9LWT6|Q9LWT6_ORYSJ	30.48	767.5	711.235	0.93	407	419	12
tr|Q9LWT6|Q9LWT6_ORYSJ	28.86	6246	7178	1.15	65	71	6
tr|Q9LWT6|Q9LWT6_ORYSJ	26.2	5730	5204	0.91	503	509	6
tr|Q9LWT6|Q9LWT6_ORYSJ	25.62	690.5	865.747	1.25	216	223	7
tr|Q9LWT6|Q9LWT6_ORYSJ	22.75	1410	1547	1.1	241	252	11
tr|Q9SNK3|Q9SNK3_ORYSJ	102.41	66850	64700	0.97	389	402	13
tr|Q9SNK3|Q9SNK3_ORYSJ	98.58	55040	55090	1	100	116	16
tr|Q9SNK3|Q9SNK3_ORYSJ	98.42	65270	59610	0.91	313	329	16
tr|Q9SNK3|Q9SNK3_ORYSJ	95.59	167400	138300	0.83	330	342	12
tr|Q9SNK3|Q9SNK3_ORYSJ	92.76	229100	217400	0.95	137	148	11
tr|Q9SNK3|Q9SNK3_ORYSJ	90.08	1816	2478	1.36	344	366	22
tr|Q9SNK3|Q9SNK3_ORYSJ	87.41	19050	19850	1.04	414	431	17
tr|Q9SNK3|Q9SNK3_ORYSJ	87.2	125200	96850	0.77	403	413	10
tr|Q9SNK3|Q9SNK3_ORYSJ	83.13	5572	7163	1.29	432	444	12
tr|Q9SNK3|Q9SNK3_ORYSJ	81.78	19370	15070	0.78	330	343	13
tr|Q9SNK3|Q9SNK3_ORYSJ	81.75	66150	81240	1.23	432	440	8
tr|Q9SNK3|Q9SNK3_ORYSJ	76.87	70020	63280	0.9	124	132	8
tr|Q9SNK3|Q9SNK3_ORYSJ	74.71	191800	170900	0.89	242	251	9
tr|Q9SNK3|Q9SNK3_ORYSJ	73.66	31430	27640	0.88	318	329	11
tr|Q9SNK3|Q9SNK3_ORYSJ	72.13	1654	550.447	0.33	367	388	21
tr|Q9SNK3|Q9SNK3_ORYSJ	71.99	75420	72200	0.96	294	303	9
tr|Q9SNK3|Q9SNK3_ORYSJ	68.43	2593	3163	1.22	414	440	26
tr|Q9SNK3|Q9SNK3_ORYSJ	64.89	27030	29780	1.1	194	202	8
tr|Q9SNK3|Q9SNK3_ORYSJ	59.4	3548	4702	1.33	329	342	13
tr|Q9SNK3|Q9SNK3_ORYSJ	56.48	29070	31430	1.08	152	160	8
tr|Q9SNK3|Q9SNK3_ORYSJ	55.51	411.5	173.343	0.42	294	305	11
tr|Q9SNK3|Q9SNK3_ORYSJ	54.76	603	721.375	1.2	315	329	14
tr|Q9SNK3|Q9SNK3_ORYSJ	50.94	1168	1014	0.87	367	388	21
tr|Q9SNK3|Q9SNK3_ORYSJ	50.73	3246	4187	1.29	102	116	14
tr|Q9SNK3|Q9SNK3_ORYSJ	50.32	46660	47260	1.01	117	123	6
tr|Q9SNK3|Q9SNK3_ORYSJ	49.17	8421	8992	1.07	124	132	8
tr|Q9SNK3|Q9SNK3_ORYSJ	47.38	31770	34220	1.08	195	202	7
tr|Q9SNK3|Q9SNK3_ORYSJ	47.34	466.5	295.986	0.63	367	388	21
tr|Q9SNK3|Q9SNK3_ORYSJ	46.23	1240	1338	1.08	416	431	15
tr|Q9SNK3|Q9SNK3_ORYSJ	46.09	363.5	247.701	0.68	367	388	21
tr|Q9SNK3|Q9SNK3_ORYSJ	44.68	3067	2690	0.88	389	399	10
tr|Q9SNK3|Q9SNK3_ORYSJ	38.18	321.5	166.583	0.52	414	429	15
tr|Q9SNK3|Q9SNK3_ORYSJ	37.97	1882	1297	0.69	403	411	8
tr|Q9SNK3|Q9SNK3_ORYSJ	37.82	193	438.426	2.27	350	366	16
tr|Q9SNK3|Q9SNK3_ORYSJ	34.69	2316	2169	0.94	64	71	7
tr|Q9SNK3|Q9SNK3_ORYSJ	30.53	188.5	100.915	0.54	203	224	21
tr|Q9SNK3|Q9SNK3_ORYSJ	27.37	393	363.102	0.92	313	326	13
tr|Q9SNK3|Q9SNK3_ORYSJ	25	1162	707.373	0.61	124	136	12
tr|Q9SNK3|Q9SNK3_ORYSJ	23.54	297.5	180.102	0.61	367	388	21
tr|Q9SNK3|Q9SNK3_ORYSJ	21.52	233.5	205.211	0.88	330	338	8
tr|A2XC18|A2XC18_ORYSI	102.41	66850	64700	0.97	389	402	13
tr|A2XC18|A2XC18_ORYSI	98.58	55040	55090	1	100	116	16
tr|A2XC18|A2XC18_ORYSI	98.42	65270	59610	0.91	313	329	16
tr|A2XC18|A2XC18_ORYSI	95.59	167400	138300	0.83	330	342	12
tr|A2XC18|A2XC18_ORYSI	92.76	229100	217400	0.95	137	148	11
tr|A2XC18|A2XC18_ORYSI	90.08	1816	2478	1.36	344	366	22
tr|A2XC18|A2XC18_ORYSI	87.41	19050	19850	1.04	414	431	17
tr|A2XC18|A2XC18_ORYSI	87.2	125200	96850	0.77	403	413	10
tr|A2XC18|A2XC18_ORYSI	83.13	5572	7163	1.29	432	444	12
tr|A2XC18|A2XC18_ORYSI	81.78	19370	15070	0.78	330	343	13
tr|A2XC18|A2XC18_ORYSI	81.75	66150	81240	1.23	432	440	8
tr|A2XC18|A2XC18_ORYSI	76.87	70020	63280	0.9	124	132	8
tr|A2XC18|A2XC18_ORYSI	74.71	191800	170900	0.89	242	251	9
tr|A2XC18|A2XC18_ORYSI	73.66	31430	27640	0.88	318	329	11
tr|A2XC18|A2XC18_ORYSI	72.13	1654	550.447	0.33	367	388	21
tr|A2XC18|A2XC18_ORYSI	71.99	75420	72200	0.96	294	303	9
tr|A2XC18|A2XC18_ORYSI	68.43	2593	3163	1.22	414	440	26
tr|A2XC18|A2XC18_ORYSI	64.89	27030	29780	1.1	194	202	8
tr|A2XC18|A2XC18_ORYSI	59.4	3548	4702	1.33	329	342	13
tr|A2XC18|A2XC18_ORYSI	56.48	29070	31430	1.08	152	160	8
tr|A2XC18|A2XC18_ORYSI	55.51	411.5	173.343	0.42	294	305	11
tr|A2XC18|A2XC18_ORYSI	54.76	603	721.375	1.2	315	329	14
tr|A2XC18|A2XC18_ORYSI	50.94	1168	1014	0.87	367	388	21
tr|A2XC18|A2XC18_ORYSI	50.73	3246	4187	1.29	102	116	14
tr|A2XC18|A2XC18_ORYSI	50.32	46660	47260	1.01	117	123	6
tr|A2XC18|A2XC18_ORYSI	49.17	8421	8992	1.07	124	132	8
tr|A2XC18|A2XC18_ORYSI	47.38	31770	34220	1.08	195	202	7
tr|A2XC18|A2XC18_ORYSI	47.34	466.5	295.986	0.63	367	388	21
tr|A2XC18|A2XC18_ORYSI	46.23	1240	1338	1.08	416	431	15
tr|A2XC18|A2XC18_ORYSI	46.09	363.5	247.701	0.68	367	388	21
tr|A2XC18|A2XC18_ORYSI	44.68	3067	2690	0.88	389	399	10
tr|A2XC18|A2XC18_ORYSI	38.18	321.5	166.583	0.52	414	429	15
tr|A2XC18|A2XC18_ORYSI	37.97	1882	1297	0.69	403	411	8
tr|A2XC18|A2XC18_ORYSI	37.82	193	438.426	2.27	350	366	16
tr|A2XC18|A2XC18_ORYSI	34.69	2316	2169	0.94	64	71	7
tr|A2XC18|A2XC18_ORYSI	30.53	188.5	100.915	0.54	203	224	21
tr|A2XC18|A2XC18_ORYSI	27.37	393	363.102	0.92	313	326	13
tr|A2XC18|A2XC18_ORYSI	25	1162	707.373	0.61	124	136	12
tr|A2XC18|A2XC18_ORYSI	23.54	297.5	180.102	0.61	367	388	21
tr|A2XC18|A2XC18_ORYSI	21.52	233.5	205.211	0.88	330	338	8
tr|A0A0E0GG91|A0A0E0GG91_ORYNI	102.41	66850	64700	0.97	389	402	13
tr|A0A0E0GG91|A0A0E0GG91_ORYNI	98.58	55040	55090	1	100	116	16
tr|A0A0E0GG91|A0A0E0GG91_ORYNI	98.42	65270	59610	0.91	313	329	16
tr|A0A0E0GG91|A0A0E0GG91_ORYNI	95.59	167400	138300	0.83	330	342	12
tr|A0A0E0GG91|A0A0E0GG91_ORYNI	92.76	229100	217400	0.95	137	148	11
tr|A0A0E0GG91|A0A0E0GG91_ORYNI	90.08	1816	2478	1.36	344	366	22
tr|A0A0E0GG91|A0A0E0GG91_ORYNI	87.41	19050	19850	1.04	414	431	17
tr|A0A0E0GG91|A0A0E0GG91_ORYNI	87.2	125200	96850	0.77	403	413	10
tr|A0A0E0GG91|A0A0E0GG91_ORYNI	83.13	5572	7163	1.29	432	444	12
tr|A0A0E0GG91|A0A0E0GG91_ORYNI	81.78	19370	15070	0.78	330	343	13
tr|A0A0E0GG91|A0A0E0GG91_ORYNI	81.75	66150	81240	1.23	432	440	8
tr|A0A0E0GG91|A0A0E0GG91_ORYNI	76.87	70020	63280	0.9	124	132	8
tr|A0A0E0GG91|A0A0E0GG91_ORYNI	74.71	191800	170900	0.89	242	251	9
tr|A0A0E0GG91|A0A0E0GG91_ORYNI	73.66	31430	27640	0.88	318	329	11
tr|A0A0E0GG91|A0A0E0GG91_ORYNI	72.13	1654	550.447	0.33	367	388	21
tr|A0A0E0GG91|A0A0E0GG91_ORYNI	71.99	75420	72200	0.96	294	303	9
tr|A0A0E0GG91|A0A0E0GG91_ORYNI	68.43	2593	3163	1.22	414	440	26
tr|A0A0E0GG91|A0A0E0GG91_ORYNI	64.89	27030	29780	1.1	194	202	8
tr|A0A0E0GG91|A0A0E0GG91_ORYNI	59.4	3548	4702	1.33	329	342	13
tr|A0A0E0GG91|A0A0E0GG91_ORYNI	56.48	29070	31430	1.08	152	160	8
tr|A0A0E0GG91|A0A0E0GG91_ORYNI	55.51	411.5	173.343	0.42	294	305	11
tr|A0A0E0GG91|A0A0E0GG91_ORYNI	54.76	603	721.375	1.2	315	329	14
tr|A0A0E0GG91|A0A0E0GG91_ORYNI	50.94	1168	1014	0.87	367	388	21
tr|A0A0E0GG91|A0A0E0GG91_ORYNI	50.73	3246	4187	1.29	102	116	14
tr|A0A0E0GG91|A0A0E0GG91_ORYNI	50.32	46660	47260	1.01	117	123	6
tr|A0A0E0GG91|A0A0E0GG91_ORYNI	49.17	8421	8992	1.07	124	132	8
tr|A0A0E0GG91|A0A0E0GG91_ORYNI	47.38	31770	34220	1.08	195	202	7
tr|A0A0E0GG91|A0A0E0GG91_ORYNI	47.34	466.5	295.986	0.63	367	388	21
tr|A0A0E0GG91|A0A0E0GG91_ORYNI	46.23	1240	1338	1.08	416	431	15
tr|A0A0E0GG91|A0A0E0GG91_ORYNI	46.09	363.5	247.701	0.68	367	388	21
tr|A0A0E0GG91|A0A0E0GG91_ORYNI	44.68	3067	2690	0.88	389	399	10
tr|A0A0E0GG91|A0A0E0GG91_ORYNI	38.18	321.5	166.583	0.52	414	429	15
tr|A0A0E0GG91|A0A0E0GG91_ORYNI	37.97	1882	1297	0.69	403	411	8
tr|A0A0E0GG91|A0A0E0GG91_ORYNI	37.82	193	438.426	2.27	350	366	16
tr|A0A0E0GG91|A0A0E0GG91_ORYNI	34.69	2316	2169	0.94	64	71	7
tr|A0A0E0GG91|A0A0E0GG91_ORYNI	30.53	188.5	100.915	0.54	203	224	21
tr|A0A0E0GG91|A0A0E0GG91_ORYNI	27.37	393	363.102	0.92	313	326	13
tr|A0A0E0GG91|A0A0E0GG91_ORYNI	25	1162	707.373	0.61	124	136	12
tr|A0A0E0GG91|A0A0E0GG91_ORYNI	23.54	297.5	180.102	0.61	367	388	21
tr|A0A0E0GG91|A0A0E0GG91_ORYNI	21.52	233.5	205.211	0.88	330	338	8
tr|B8B9L6|B8B9L6_ORYSI	95.5	14460	11430	0.79	762	775	13
tr|B8B9L6|B8B9L6_ORYSI	73.51	43920	54090	1.23	141	149	8
tr|B8B9L6|B8B9L6_ORYSI	69.38	3002	3655	1.22	138	149	11
tr|B8B9L6|B8B9L6_ORYSI	67.25	5769	4066	0.7	762	775	13
tr|A0A0E0GDA6|A0A0E0GDA6_ORYNI	65.92	781	80.153	0.1	334	352	18
tr|A0A0E0GDA6|A0A0E0GDA6_ORYNI	57.26	1360	1124	0.83	334	349	15
tr|A0A0E0H3M3|A0A0E0H3M3_ORYNI	101.58	6926	8260	1.19	133	147	14
tr|A0A0E0H3M3|A0A0E0H3M3_ORYNI	81.95	4616	4665	1.01	85	96	11
tr|A0A0E0H3M3|A0A0E0H3M3_ORYNI	75.18	401.5	338.477	0.84	113	132	19
tr|A0A0E0H3M3|A0A0E0H3M3_ORYNI	68.41	224	515.682	2.3	113	132	19
tr|A0A0E0H3M3|A0A0E0H3M3_ORYNI	67.46	182.5	263.152	1.44	113	132	19
tr|A0A0E0H3M3|A0A0E0H3M3_ORYNI	52.27	11320	14420	1.27	222	231	9
tr|A0A0E0H3M3|A0A0E0H3M3_ORYNI	47.12	11310	12960	1.15	77	84	7
tr|A0A0E0H3M3|A0A0E0H3M3_ORYNI	45.98	8031	8202	1.02	213	219	6
tr|A0A0E0H3M3|A0A0E0H3M3_ORYNI	32.8	1421	2045	1.44	222	231	9
tr|A0A0E0H3M3|A0A0E0H3M3_ORYNI	27.65	452.5	661.985	1.46	195	203	8
tr|A2XVY3|A2XVY3_ORYSI	101.58	6926	8260	1.19	135	149	14
tr|A2XVY3|A2XVY3_ORYSI	81.95	4616	4665	1.01	87	98	11
tr|A2XVY3|A2XVY3_ORYSI	75.18	401.5	338.477	0.84	115	134	19
tr|A2XVY3|A2XVY3_ORYSI	68.41	224	515.682	2.3	115	134	19
tr|A2XVY3|A2XVY3_ORYSI	67.46	182.5	263.152	1.44	115	134	19
tr|A2XVY3|A2XVY3_ORYSI	52.27	11320	14420	1.27	224	233	9
tr|A2XVY3|A2XVY3_ORYSI	47.12	11310	12960	1.15	79	86	7
tr|A2XVY3|A2XVY3_ORYSI	45.98	8031	8202	1.02	215	221	6
tr|A2XVY3|A2XVY3_ORYSI	32.8	1421	2045	1.44	224	233	9
tr|A2XVY3|A2XVY3_ORYSI	27.65	452.5	661.985	1.46	197	205	8
tr|Q6YU90|Q6YU90_ORYSJ	108.4	5562	4756	0.85	147	164	17
tr|Q6YU90|Q6YU90_ORYSJ	98.78	16010	8499	0.53	48	62	14
tr|Q6YU90|Q6YU90_ORYSJ	98.71	64040	52450	0.82	330	343	13
tr|Q6YU90|Q6YU90_ORYSJ	97.31	7589	6096	0.8	294	313	19
tr|Q6YU90|Q6YU90_ORYSJ	97.18	8271	6868	0.83	85	107	22
tr|Q6YU90|Q6YU90_ORYSJ	95.9	62670	51160	0.82	274	287	13
tr|Q6YU90|Q6YU90_ORYSJ	95.79	30800	29420	0.96	362	377	15
tr|Q6YU90|Q6YU90_ORYSJ	93.65	13970	12110	0.87	91	107	16
tr|Q6YU90|Q6YU90_ORYSJ	90.59	9208	8277	0.9	346	361	15
tr|Q6YU90|Q6YU90_ORYSJ	89.4	72750	54220	0.75	190	202	12
tr|Q6YU90|Q6YU90_ORYSJ	85.49	26610	20800	0.78	314	326	12
tr|Q6YU90|Q6YU90_ORYSJ	84.27	21350	17340	0.81	93	107	14
tr|Q6YU90|Q6YU90_ORYSJ	83.77	271.5	162.72	0.6	85	107	22
tr|Q6YU90|Q6YU90_ORYSJ	82.17	503.5	539.824	1.07	108	136	28
tr|Q6YU90|Q6YU90_ORYSJ	81.96	66410	54230	0.82	236	248	12
tr|Q6YU90|Q6YU90_ORYSJ	79.5	15820	13590	0.86	249	258	9
tr|Q6YU90|Q6YU90_ORYSJ	78.44	1956	881.681	0.45	91	107	16
tr|Q6YU90|Q6YU90_ORYSJ	78.27	12830	10450	0.81	330	343	13
tr|Q6YU90|Q6YU90_ORYSJ	75.13	10720	11050	1.03	190	202	12
tr|Q6YU90|Q6YU90_ORYSJ	74.91	50080	47960	0.96	165	175	10
tr|Q6YU90|Q6YU90_ORYSJ	74.77	25860	19680	0.76	206	215	9
tr|Q6YU90|Q6YU90_ORYSJ	72.26	33760	33540	0.99	216	225	9
tr|Q6YU90|Q6YU90_ORYSJ	69.9	89070	69930	0.79	227	235	8
tr|Q6YU90|Q6YU90_ORYSJ	68.25	6344	5856	0.92	94	107	13
tr|Q6YU90|Q6YU90_ORYSJ	67.94	8311	8258	0.99	4	15	11
tr|Q6YU90|Q6YU90_ORYSJ	66.21	2078	2125	1.02	147	158	11
tr|Q6YU90|Q6YU90_ORYSJ	65.45	64960	56930	0.88	138	146	8
tr|Q6YU90|Q6YU90_ORYSJ	64.05	47180	42540	0.9	265	273	8
tr|Q6YU90|Q6YU90_ORYSJ	63.59	323.5	311.437	0.96	63	83	20
tr|Q6YU90|Q6YU90_ORYSJ	59.32	1458	811.668	0.56	294	313	19
tr|Q6YU90|Q6YU90_ORYSJ	58.94	1163	1696	1.46	274	285	11
tr|Q6YU90|Q6YU90_ORYSJ	58.49	2454	1889	0.77	137	146	9
tr|Q6YU90|Q6YU90_ORYSJ	58.18	71550	58000	0.81	40	47	7
tr|Q6YU90|Q6YU90_ORYSJ	57.76	1478	1250	0.85	346	359	13
tr|Q6YU90|Q6YU90_ORYSJ	57.01	490.5	740.206	1.51	226	235	9
tr|Q6YU90|Q6YU90_ORYSJ	56.47	2732	3357	1.23	147	161	14
tr|Q6YU90|Q6YU90_ORYSJ	55.16	24400	23570	0.97	32	39	7
tr|Q6YU90|Q6YU90_ORYSJ	53.91	5068	4541	0.9	264	273	9
tr|Q6YU90|Q6YU90_ORYSJ	53.01	6630	7800	1.18	147	156	9
tr|Q6YU90|Q6YU90_ORYSJ	51.39	28210	28920	1.03	378	385	7
tr|Q6YU90|Q6YU90_ORYSJ	50.86	326.5	18.831	0.06	360	377	17
tr|Q6YU90|Q6YU90_ORYSJ	50.56	4016	5328	1.33	98	107	9
tr|Q6YU90|Q6YU90_ORYSJ	48.78	14790	14330	0.97	227	235	8
tr|Q6YU90|Q6YU90_ORYSJ	48.19	5.5	308.54	56.1	315	326	11
tr|Q6YU90|Q6YU90_ORYSJ	48.18	17340	15570	0.9	183	189	6
tr|Q6YU90|Q6YU90_ORYSJ	46.84	6246	5879	0.94	138	146	8
tr|Q6YU90|Q6YU90_ORYSJ	46.82	8384	5697	0.68	157	164	7
tr|Q6YU90|Q6YU90_ORYSJ	46.69	571.5	441.806	0.77	362	372	10
tr|Q6YU90|Q6YU90_ORYSJ	44.92	2196	1119	0.51	216	226	10
tr|Q6YU90|Q6YU90_ORYSJ	43.21	180.5	253.495	1.4	2	15	13
tr|Q6YU90|Q6YU90_ORYSJ	41.32	777.5	982.596	1.26	294	313	19
tr|Q6YU90|Q6YU90_ORYSJ	40.01	608.5	306.609	0.5	276	287	11
tr|Q6YU90|Q6YU90_ORYSJ	35.84	14540	11670	0.8	176	182	6
tr|Q6YU90|Q6YU90_ORYSJ	35.29	5392	5023	0.93	314	320	6
tr|Q6YU90|Q6YU90_ORYSJ	32.67	1704	1591	0.93	192	202	10
tr|Q6YU90|Q6YU90_ORYSJ	32.62	958	856.573	0.89	32	47	15
tr|Q6YU90|Q6YU90_ORYSJ	31.98	1450	1067	0.74	190	198	8
tr|Q6YU90|Q6YU90_ORYSJ	31.74	620.5	993.219	1.6	346	354	8
tr|Q6YU90|Q6YU90_ORYSJ	30.76	173.5	121.195	0.7	48	58	10
tr|Q6YU90|Q6YU90_ORYSJ	29.87	2638	2599	0.99	378	386	8
tr|Q6YU90|Q6YU90_ORYSJ	29.52	588.5	423.458	0.72	206	213	7
tr|Q6YU90|Q6YU90_ORYSJ	27.7	2441	2603	1.07	355	361	6
tr|Q6YU90|Q6YU90_ORYSJ	26.24	241.5	266.049	1.1	305	313	8
tr|Q6YU90|Q6YU90_ORYSJ	25.17	705.5	1228	1.74	137	146	9
tr|Q6YU90|Q6YU90_ORYSJ	22.88	763.5	776.903	1.02	93	107	14
tr|Q6YU90|Q6YU90_ORYSJ	21.79	1254	1065	0.85	294	306	12
tr|A0A0E0GBN6|A0A0E0GBN6_ORYNI	118.56	3318	2323	0.7	90	116	26
tr|A0A0E0GBN6|A0A0E0GBN6_ORYNI	116.58	40950	27690	0.68	333	349	16
tr|A0A0E0GBN6|A0A0E0GBN6_ORYNI	107.51	2264	2698	1.19	309	332	23
tr|A0A0E0GBN6|A0A0E0GBN6_ORYNI	97.04	93730	70620	0.75	173	186	13
tr|A0A0E0GBN6|A0A0E0GBN6_ORYNI	94.1	5222	3210	0.61	278	298	20
tr|A0A0E0GBN6|A0A0E0GBN6_ORYNI	91.18	20270	17710	0.87	53	70	17
tr|A0A0E0GBN6|A0A0E0GBN6_ORYNI	90.02	4189	2339	0.56	361	381	20
tr|A0A0E0GBN6|A0A0E0GBN6_ORYNI	87.72	120200	82300	0.68	131	142	11
tr|A0A0E0GBN6|A0A0E0GBN6_ORYNI	87.34	33650	27560	0.82	173	186	13
tr|A0A0E0GBN6|A0A0E0GBN6_ORYNI	85.85	32850	24350	0.74	77	89	12
tr|A0A0E0GBN6|A0A0E0GBN6_ORYNI	83.97	199300	153200	0.77	350	360	10
tr|A0A0E0GBN6|A0A0E0GBN6_ORYNI	79.8	97040	73040	0.75	384	393	9
tr|A0A0E0GBN6|A0A0E0GBN6_ORYNI	78.49	559	250.598	0.45	309	332	23
tr|A0A0E0GBN6|A0A0E0GBN6_ORYNI	77.49	12130	10060	0.83	243	264	21
tr|A0A0E0GBN6|A0A0E0GBN6_ORYNI	72.24	1203	1770	1.47	382	393	11
tr|A0A0E0GBN6|A0A0E0GBN6_ORYNI	71.46	17290	13720	0.79	131	142	11
tr|A0A0E0GBN6|A0A0E0GBN6_ORYNI	71.01	199100	165300	0.83	394	402	8
tr|A0A0E0GBN6|A0A0E0GBN6_ORYNI	69.17	102000	76500	0.75	394	403	9
tr|A0A0E0GBN6|A0A0E0GBN6_ORYNI	69.17	43610	33640	0.77	299	308	9
tr|A0A0E0GBN6|A0A0E0GBN6_ORYNI	68.31	4738	2815	0.59	337	349	12
tr|A0A0E0GBN6|A0A0E0GBN6_ORYNI	68.24	57690	49180	0.85	300	308	8
tr|A0A0E0GBN6|A0A0E0GBN6_ORYNI	68.05	21490	19930	0.93	231	242	11
tr|A0A0E0GBN6|A0A0E0GBN6_ORYNI	67.71	914	1589	1.74	97	116	19
tr|A0A0E0GBN6|A0A0E0GBN6_ORYNI	65.56	3431	3070	0.89	370	381	11
tr|A0A0E0GBN6|A0A0E0GBN6_ORYNI	62.36	104800	69810	0.67	217	224	7
tr|A0A0E0GBN6|A0A0E0GBN6_ORYNI	62.27	21130	14400	0.68	173	182	9
tr|A0A0E0GBN6|A0A0E0GBN6_ORYNI	61.33	12080	11670	0.97	350	360	10
tr|A0A0E0GBN6|A0A0E0GBN6_ORYNI	60.23	1511	816.014	0.54	149	163	14
tr|A0A0E0GBN6|A0A0E0GBN6_ORYNI	55.38	4126	3402	0.82	333	342	9
tr|A0A0E0GBN6|A0A0E0GBN6_ORYNI	53.04	598.5	584.729	0.98	333	345	12
tr|A0A0E0GBN6|A0A0E0GBN6_ORYNI	52.78	565.5	783.663	1.39	149	172	23
tr|A0A0E0GBN6|A0A0E0GBN6_ORYNI	50.58	5795	5902	1.02	233	242	9
tr|A0A0E0GBN6|A0A0E0GBN6_ORYNI	49.78	4421	5425	1.23	121	130	9
tr|A0A0E0GBN6|A0A0E0GBN6_ORYNI	45.72	10030	11170	1.11	123	130	7
tr|A0A0E0GBN6|A0A0E0GBN6_ORYNI	45.68	310.5	459.189	1.48	309	319	10
tr|A0A0E0GBN6|A0A0E0GBN6_ORYNI	44.82	3475	2575	0.74	173	182	9
tr|A0A0E0GBN6|A0A0E0GBN6_ORYNI	39.67	379.5	392.556	1.03	175	186	11
tr|A0A0E0GBN6|A0A0E0GBN6_ORYNI	36.45	5088	5188	1.02	82	89	7
tr|A0A0E0GBN6|A0A0E0GBN6_ORYNI	35.79	2114	1267	0.6	350	358	8
tr|A0A0E0GBN6|A0A0E0GBN6_ORYNI	33.64	2385	3036	1.27	395	402	7
tr|A0A0E0GBN6|A0A0E0GBN6_ORYNI	30.83	2515	1788	0.71	149	156	7
tr|A0A0E0GBN6|A0A0E0GBN6_ORYNI	30.28	733.5	496.851	0.68	350	357	7
tr|A0A0E0GBN6|A0A0E0GBN6_ORYNI	30.02	653.5	721.858	1.1	320	332	12
tr|A0A0E0GBN6|A0A0E0GBN6_ORYNI	29.27	1266	1447	1.14	133	142	9
tr|A0A0E0GBN6|A0A0E0GBN6_ORYNI	27.61	562.5	398.35	0.71	149	157	8
tr|A0A0E0GBN6|A0A0E0GBN6_ORYNI	27.11	849.5	992.253	1.17	255	264	9
tr|A0A0E0GBN6|A0A0E0GBN6_ORYNI	27.01	144.5	166.583	1.15	134	142	8
tr|A0A0E0GBN6|A0A0E0GBN6_ORYNI	26.72	198.5	464.017	2.34	76	89	13
tr|A0A0E0GBN6|A0A0E0GBN6_ORYNI	26.22	411.5	239.976	0.58	110	116	6
tr|A0A0E0GBN6|A0A0E0GBN6_ORYNI	24.73	502.5	293.089	0.58	309	324	15
tr|A0A0E0GBN6|A0A0E0GBN6_ORYNI	23.7	537.5	854.159	1.59	343	349	6
tr|Q8GRU9|Q8GRU9_ORYSI	118.56	3318	2323	0.7	90	116	26
tr|Q8GRU9|Q8GRU9_ORYSI	116.58	40950	27690	0.68	333	349	16
tr|Q8GRU9|Q8GRU9_ORYSI	107.51	2264	2698	1.19	309	332	23
tr|Q8GRU9|Q8GRU9_ORYSI	97.04	93730	70620	0.75	173	186	13
tr|Q8GRU9|Q8GRU9_ORYSI	94.1	5222	3210	0.61	278	298	20
tr|Q8GRU9|Q8GRU9_ORYSI	91.18	20270	17710	0.87	53	70	17
tr|Q8GRU9|Q8GRU9_ORYSI	90.02	4189	2339	0.56	361	381	20
tr|Q8GRU9|Q8GRU9_ORYSI	87.72	120200	82300	0.68	131	142	11
tr|Q8GRU9|Q8GRU9_ORYSI	87.34	33650	27560	0.82	173	186	13
tr|Q8GRU9|Q8GRU9_ORYSI	85.85	32850	24350	0.74	77	89	12
tr|Q8GRU9|Q8GRU9_ORYSI	83.97	199300	153200	0.77	350	360	10
tr|Q8GRU9|Q8GRU9_ORYSI	79.8	97040	73040	0.75	384	393	9
tr|Q8GRU9|Q8GRU9_ORYSI	78.49	559	250.598	0.45	309	332	23
tr|Q8GRU9|Q8GRU9_ORYSI	77.49	12130	10060	0.83	243	264	21
tr|Q8GRU9|Q8GRU9_ORYSI	72.24	1203	1770	1.47	382	393	11
tr|Q8GRU9|Q8GRU9_ORYSI	71.46	17290	13720	0.79	131	142	11
tr|Q8GRU9|Q8GRU9_ORYSI	71.01	199100	165300	0.83	394	402	8
tr|Q8GRU9|Q8GRU9_ORYSI	69.17	102000	76500	0.75	394	403	9
tr|Q8GRU9|Q8GRU9_ORYSI	69.17	43610	33640	0.77	299	308	9
tr|Q8GRU9|Q8GRU9_ORYSI	68.31	4738	2815	0.59	337	349	12
tr|Q8GRU9|Q8GRU9_ORYSI	68.24	57690	49180	0.85	300	308	8
tr|Q8GRU9|Q8GRU9_ORYSI	68.05	21490	19930	0.93	231	242	11
tr|Q8GRU9|Q8GRU9_ORYSI	67.71	914	1589	1.74	97	116	19
tr|Q8GRU9|Q8GRU9_ORYSI	65.56	3431	3070	0.89	370	381	11
tr|Q8GRU9|Q8GRU9_ORYSI	62.36	104800	69810	0.67	217	224	7
tr|Q8GRU9|Q8GRU9_ORYSI	62.27	21130	14400	0.68	173	182	9
tr|Q8GRU9|Q8GRU9_ORYSI	61.33	12080	11670	0.97	350	360	10
tr|Q8GRU9|Q8GRU9_ORYSI	60.23	1511	816.014	0.54	149	163	14
tr|Q8GRU9|Q8GRU9_ORYSI	55.38	4126	3402	0.82	333	342	9
tr|Q8GRU9|Q8GRU9_ORYSI	53.04	598.5	584.729	0.98	333	345	12
tr|Q8GRU9|Q8GRU9_ORYSI	52.78	565.5	783.663	1.39	149	172	23
tr|Q8GRU9|Q8GRU9_ORYSI	50.58	5795	5902	1.02	233	242	9
tr|Q8GRU9|Q8GRU9_ORYSI	49.78	4421	5425	1.23	121	130	9
tr|Q8GRU9|Q8GRU9_ORYSI	45.72	10030	11170	1.11	123	130	7
tr|Q8GRU9|Q8GRU9_ORYSI	45.68	310.5	459.189	1.48	309	319	10
tr|Q8GRU9|Q8GRU9_ORYSI	44.82	3475	2575	0.74	173	182	9
tr|Q8GRU9|Q8GRU9_ORYSI	39.67	379.5	392.556	1.03	175	186	11
tr|Q8GRU9|Q8GRU9_ORYSI	36.45	5088	5188	1.02	82	89	7
tr|Q8GRU9|Q8GRU9_ORYSI	35.79	2114	1267	0.6	350	358	8
tr|Q8GRU9|Q8GRU9_ORYSI	33.64	2385	3036	1.27	395	402	7
tr|Q8GRU9|Q8GRU9_ORYSI	30.83	2515	1788	0.71	149	156	7
tr|Q8GRU9|Q8GRU9_ORYSI	30.28	733.5	496.851	0.68	350	357	7
tr|Q8GRU9|Q8GRU9_ORYSI	30.02	653.5	721.858	1.1	320	332	12
tr|Q8GRU9|Q8GRU9_ORYSI	29.27	1266	1447	1.14	133	142	9
tr|Q8GRU9|Q8GRU9_ORYSI	27.61	562.5	398.35	0.71	149	157	8
tr|Q8GRU9|Q8GRU9_ORYSI	27.11	849.5	992.253	1.17	255	264	9
tr|Q8GRU9|Q8GRU9_ORYSI	27.01	144.5	166.583	1.15	134	142	8
tr|Q8GRU9|Q8GRU9_ORYSI	26.72	198.5	464.017	2.34	76	89	13
tr|Q8GRU9|Q8GRU9_ORYSI	26.22	411.5	239.976	0.58	110	116	6
tr|Q8GRU9|Q8GRU9_ORYSI	24.73	502.5	293.089	0.58	309	324	15
tr|Q8GRU9|Q8GRU9_ORYSI	23.7	537.5	854.159	1.59	343	349	6
tr|Q6Z8F4|Q6Z8F4_ORYSJ	118.56	3318	2323	0.7	90	116	26
[truncated: 80,904 more rows]

## Sheet: Differentially expressed protei
Protein ID	Accession	abundance in WT	abundance in lses1	fold change	-10lgP	Avg. Mass	Description
18292	tr|A2YSK1|A2YSK1_ORYSI	564.5	0	0	127.71	43824	Uncharacterized protein OS=Oryza sativa subsp. indica OX=39946 GN=OsI_28301 PE=3 SV=1
21866	tr|A2XAA0|A2XAA0_ORYSI	446.5	0	0	85.21	26589	Uncharacterized protein OS=Oryza sativa subsp. indica OX=39946 GN=OsI_09178 PE=3 SV=1
3910	tr|A2Z3C6|A2Z3C6_ORYSI	486.5	32.351	0.07	111.67	34325	Uncharacterized protein OS=Oryza sativa subsp. indica OX=39946 GN=OsI_32127 PE=4 SV=1
30895	tr|A2X6Z9|A2X6Z9_ORYSI	1161	143.889	0.12	47.57	28534	Uncharacterized protein OS=Oryza sativa subsp. indica OX=39946 GN=OsI_07990 PE=4 SV=1
7317	tr|B8BJU1|B8BJU1_ORYSI	2494	407.524	0.16	287.28	119231	Uncharacterized protein OS=Oryza sativa subsp. indica OX=39946 GN=OsI_35637 PE=4 SV=1
30407	tr|B8ANN3|B8ANN3_ORYSI	332.5	52.63	0.16	24.39	83530	Uncharacterized protein OS=Oryza sativa subsp. indica OX=39946 GN=OsI_14326 PE=4 SV=1
30064	tr|B8ATX7|B8ATX7_ORYSI	541.5	94.155	0.17	26.94	89823	Uncharacterized protein OS=Oryza sativa subsp. indica OX=39946 GN=OsI_17345 PE=4 SV=1
28645	tr|C8TF89|C8TF89_ORYSI	1332	239.01	0.18	26.71	114976	Uncharacterized protein K0098G01.22 OS=Oryza sativa subsp. indica OX=39946 GN=K0098G01.22 PE=4 SV=1
26366	tr|B8BCQ7|B8BCQ7_ORYSI	348.5	73.876	0.21	72.54	34630	Uncharacterized protein OS=Oryza sativa subsp. indica OX=39946 GN=OsI_31671 PE=4 SV=1
8728	tr|B8B8Z9|B8B8Z9_ORYSI	2763	665.365	0.24	305.6	50689	Uncharacterized protein OS=Oryza sativa subsp. indica OX=39946 GN=OsI_28562 PE=4 SV=1
26209	tr|A2Z8T4|A2Z8T4_ORYSI	405.5	105.744	0.26	89.97	21545	Uncharacterized protein OS=Oryza sativa subsp. indica OX=39946 GN=OsI_34127 PE=4 SV=1
24152	tr|B8AME3|B8AME3_ORYSI	322.5	92.224	0.29	90.58	56149	Uncharacterized protein OS=Oryza sativa subsp. indica OX=39946 GN=OsI_09858 PE=4 SV=1
30443	tr|A2XZ27|A2XZ27_ORYSI	381.5	112.504	0.29	38.31	35729	Uncharacterized protein OS=Oryza sativa subsp. indica OX=39946 GN=OsI_17961 PE=4 SV=1
22089	tr|B8BDY2|B8BDY2_ORYSI	4629	1406	0.3	118.43	25995	Uncharacterized protein OS=Oryza sativa subsp. indica OX=39946 GN=OsI_30728 PE=4 SV=1
22090	tr|Q0P166|Q0P166_ORYSI	4629	1406	0.3	118.43	29206	Uncharacterized protein OS=Oryza sativa subsp. indica OX=39946 GN=TQR14A11.4 PE=4 SV=1
28637	tr|A2YDD7|A2YDD7_ORYSI	252.5	77.739	0.31	75.62	40273	Uncharacterized protein OS=Oryza sativa subsp. indica OX=39946 GN=OsI_23126 PE=4 SV=1
14435	tr|A2XN99|A2XN99_ORYSI	877.5	289.226	0.33	215.85	38517	Uncharacterized protein OS=Oryza sativa subsp. indica OX=39946 GN=OsI_14032 PE=3 SV=1
15805	tr|A2Z0P4|A2Z0P4_ORYSI	603.5	201.348	0.33	123.59	100220	Uncharacterized protein OS=Oryza sativa subsp. indica OX=39946 GN=OsI_31170 PE=4 SV=1
22026	tr|A2XY06|A2XY06_ORYSI	885	293.572	0.33	108.34	42950	Uncharacterized protein OS=Oryza sativa subsp. indica OX=39946 GN=OsI_17585 PE=4 SV=1
12826	tr|A2YMG8|A2YMG8_ORYSI	705	247.218	0.35	187.53	28161	Uncharacterized protein OS=Oryza sativa subsp. indica OX=39946 GN=OsI_26421 PE=4 SV=1
27984	tr|B8ADN1|B8ADN1_ORYSI	389.5	137.612	0.35	26.58	76975	Uncharacterized protein OS=Oryza sativa subsp. indica OX=39946 GN=OsI_00697 PE=4 SV=1
29997	tr|A0A1D8GZB6|A0A1D8GZB6_ORYSI	522.5	181.068	0.35	26.48	49133	GW5 OS=Oryza sativa subsp. indica OX=39946 PE=2 SV=1
30003	tr|A2Y162|A2Y162_ORYSI	522.5	181.068	0.35	26.48	52605	Uncharacterized protein OS=Oryza sativa subsp. indica OX=39946 GN=OsI_18746 PE=4 SV=1
12980	tr|A2Z431|A2Z431_ORYSI	10460	3781	0.36	229.54	41016	Uncharacterized protein OS=Oryza sativa subsp. indica OX=39946 GN=OsI_32402 PE=3 SV=1
12559	tr|B8AAC6|B8AAC6_ORYSI	679	247.218	0.36	183.62	110665	Uncharacterized protein OS=Oryza sativa subsp. indica OX=39946 GN=OsI_02423 PE=3 SV=1
28400	tr|B8BBB2|B8BBB2_ORYSI	864	319.646	0.37	80.73	23324	Uncharacterized protein OS=Oryza sativa subsp. indica OX=39946 GN=OsI_29480 PE=4 SV=1
17567	tr|A2X4J6|A2X4J6_ORYSI	558.5	213.902	0.38	202.72	13578	Uncharacterized protein OS=Oryza sativa subsp. indica OX=39946 GN=OsI_07114 PE=4 SV=1
27135	tr|A2XBS1|A2XBS1_ORYSI	8862	3323	0.38	66.46	35888	Rhomboid-like protein OS=Oryza sativa subsp. indica OX=39946 GN=OsI_09736 PE=3 SV=1
24907	tr|B8AIV9|B8AIV9_ORYSI	858.5	332.682	0.39	53.55	73224	Uncharacterized protein OS=Oryza sativa subsp. indica OX=39946 GN=OsI_06079 PE=4 SV=1
11059	A2YGP6|USP_ORYSI	1604	642.188	0.4	197.37	67462	UDP-sugar pyrophosphorylase OS=Oryza sativa subsp. indica OX=39946 GN=USP PE=3 SV=2
11060	tr|B8B249|B8B249_ORYSI	1604	642.188	0.4	197.37	68779	Uncharacterized protein OS=Oryza sativa subsp. indica OX=39946 GN=OsI_24356 PE=4 SV=1
31762	B8BH95|ITPA_ORYSI	631.5	249.633	0.4	25.14	21726	Inosine triphosphate pyrophosphatase OS=Oryza sativa subsp. indica OX=39946 GN=OsI_33887 PE=3 SV=1
12623	tr|A2XPL8|A2XPL8_ORYSI	352.5	144.372	0.41	228.84	80216	Uncharacterized protein OS=Oryza sativa subsp. indica OX=39946 GN=OsI_14582 PE=3 SV=1
22131	tr|A2YFC5|A2YFC5_ORYSI	212.5	86.43	0.41	98.65	47539	Uncharacterized protein OS=Oryza sativa subsp. indica OX=39946 GN=OsI_23813 PE=4 SV=1
26926	tr|A2YP97|A2YP97_ORYSI	1184	483.814	0.41	55.57	36907	Uncharacterized protein OS=Oryza sativa subsp. indica OX=39946 GN=OsI_27089 PE=4 SV=1
29371	tr|B8AVI2|B8AVI2_ORYSI	202.5	82.567	0.41	51.87	81158	Uncharacterized protein OS=Oryza sativa subsp. indica OX=39946 GN=OsI_16271 PE=4 SV=1
29141	tr|A2XM00|A2XM00_ORYSI	714.5	290.192	0.41	45.05	42348	Uncharacterized protein OS=Oryza sativa subsp. indica OX=39946 GN=OsI_13506 PE=4 SV=1
28652	tr|A2Z9K3|A2Z9K3_ORYSI	417.5	180.102	0.43	24.9	25702	Uncharacterized protein OS=Oryza sativa subsp. indica OX=39946 GN=OsI_34413 PE=4 SV=1
22814	tr|A2XSB0|A2XSB0_ORYSI	6398	2847	0.44	121.33	19096	Uncharacterized protein OS=Oryza sativa subsp. indica OX=39946 GN=OsI_15509 PE=4 SV=1
28572	tr|B8B1E4|B8B1E4_ORYSI	370.5	162.72	0.44	57.89	52378	Uncharacterized protein OS=Oryza sativa subsp. indica OX=39946 GN=OsI_22844 PE=4 SV=1
4127	tr|A2YFZ4|A2YFZ4_ORYSI	458.5	204.245	0.45	215.19	43494	Glyceraldehyde-3-phosphate dehydrogenase OS=Oryza sativa subsp. indica OX=39946 GN=OsI_24036 PE=3 SV=1
29454	tr|B8AL91|B8AL91_ORYSI	983.5	454.36	0.46	54.36	25425	Uncharacterized protein OS=Oryza sativa subsp. indica OX=39946 GN=OsI_13847 PE=3 SV=1
29455	tr|B8B3Q3|B8B3Q3_ORYSI	983.5	454.36	0.46	54.36	25465	Uncharacterized protein OS=Oryza sativa subsp. indica OX=39946 GN=OsI_22041 PE=3 SV=1
30711	tr|B8AB23|B8AB23_ORYSI	983.5	454.36	0.46	54.36	26453	Uncharacterized protein OS=Oryza sativa subsp. indica OX=39946 GN=OsI_01050 PE=3 SV=1
19227	tr|B8AIY6|B8AIY6_ORYSI	274.5	129.886	0.47	124.92	100246	Uncharacterized protein OS=Oryza sativa subsp. indica OX=39946 GN=OsI_06131 PE=3 SV=1
17745	tr|B8BIF4|B8BIF4_ORYSI	825.5	394.487	0.48	124.37	32174	Uncharacterized protein OS=Oryza sativa subsp. indica OX=39946 GN=OsI_34798 PE=4 SV=1
28299	tr|B8B4D8|B8B4D8_ORYSI	315.5	152.097	0.48	65.84	41586	Uncharacterized protein OS=Oryza sativa subsp. indica OX=39946 GN=OsI_23641 PE=4 SV=1
23475	tr|B8AVT1|B8AVT1_ORYSI	359.5	175.274	0.49	94.48	37016	Cytosolic Fe-S cluster assembly factor NBP35 OS=Oryza sativa subsp. indica OX=39946 GN=NBP35 PE=3 SV=1
31395	P0C466|RR14_ORYSI	925.5	455.326	0.49	56.78	12254	30S ribosomal protein S14 chloroplastic OS=Oryza sativa subsp. indica OX=39946 GN=rps14 PE=3 SV=1
31397	tr|B8BHZ1|B8BHZ1_ORYSI	925.5	455.326	0.49	56.78	12254	30S ribosomal protein S14 chloroplastic OS=Oryza sativa subsp. indica OX=39946 GN=rps14 PE=3 SV=1
18191	tr|B8BCX5|B8BCX5_ORYSI	12530	6326	0.5	150.27	29576	Uncharacterized protein OS=Oryza sativa subsp. indica OX=39946 GN=OsI_30377 PE=4 SV=1
18862	tr|A2X2Y3|A2X2Y3_ORYSI	609.5	307.574	0.5	120.15	72454	Uncharacterized protein OS=Oryza sativa subsp. indica OX=39946 GN=OsI_06554 PE=4 SV=1
10612	tr|Q9FUS5|Q9FUS5_ORYSI	2983	1511	0.51	228.18	50278	Violaxanthin de-epoxidase OS=Oryza sativa subsp. indica OX=39946 PE=2 SV=2
20333	tr|B8B7J8|B8B7J8_ORYSI	2044	1042	0.51	124.31	75975	Amine oxidase OS=Oryza sativa subsp. indica OX=39946 GN=OsI_26556 PE=3 SV=1
27871	tr|B8AQN0|B8AQN0_ORYSI	1126	577.004	0.51	87.83	39833	Uncharacterized protein OS=Oryza sativa subsp. indica OX=39946 GN=OsI_11888 PE=4 SV=1
28936	tr|B8B836|B8B836_ORYSI	262.5	133.749	0.51	62.01	35747	Uncharacterized protein OS=Oryza sativa subsp. indica OX=39946 GN=OsI_26659 PE=4 SV=1
22394	tr|B8B7L6|B8B7L6_ORYSI	1434	748.415	0.52	105.05	17312	Uncharacterized protein OS=Oryza sativa subsp. indica OX=39946 GN=OsI_25030 PE=3 SV=1
22505	tr|B8AYY8|B8AYY8_ORYSI	1434	748.415	0.52	105.05	17306	Uncharacterized protein OS=Oryza sativa subsp. indica OX=39946 GN=OsI_18725 PE=3 SV=1
27535	tr|B8B1Z0|B8B1Z0_ORYSI	1383	717.513	0.52	80.84	12721	Uncharacterized protein OS=Oryza sativa subsp. indica OX=39946 GN=OsI_21396 PE=4 SV=1
24495	tr|B8B6S0|B8B6S0_ORYSI	3382	1745	0.52	51.51	34819	Peroxidase OS=Oryza sativa subsp. indica OX=39946 GN=OsI_24670 PE=3 SV=1
15808	tr|A2WLD5|A2WLD5_ORYSI	10290	5475	0.53	145.78	51106	Glycosyltransferase OS=Oryza sativa subsp. indica OX=39946 GN=OsI_00644 PE=3 SV=1
24209	tr|B8ANP1|B8ANP1_ORYSI	2128	1143	0.54	113.19	29026	Uncharacterized protein OS=Oryza sativa subsp. indica OX=39946 GN=OsI_14335 PE=4 SV=1
25111	tr|A2ZIT4|A2ZIT4_ORYSI	1106	599.698	0.54	47.07	30435	Uncharacterized protein OS=Oryza sativa subsp. indica OX=39946 GN=OsI_37742 PE=4 SV=1
29981	tr|A2XG08|A2XG08_ORYSI	623	337.994	0.54	38.43	38419	Hexosyltransferase OS=Oryza sativa subsp. indica OX=39946 GN=OsI_11309 PE=3 SV=1
10523	tr|A2YPN5|A2YPN5_ORYSI	56870	31560	0.55	302.72	35443	Uncharacterized protein OS=Oryza sativa subsp. indica OX=39946 GN=OsI_27235 PE=4 SV=1
24631	tr|B8AGJ2|B8AGJ2_ORYSI	1844	1021	0.55	81.29	46757	Uncharacterized protein OS=Oryza sativa subsp. indica OX=39946 GN=OsI_05615 PE=3 SV=1
28543	tr|B8BP56|B8BP56_ORYSI	816	450.015	0.55	43.78	70422	Uncharacterized protein OS=Oryza sativa subsp. indica OX=39946 GN=OsI_38012 PE=4 SV=1
20965	tr|A2Z8S7|A2Z8S7_ORYSI	4460	2497	0.56	128.91	19651	Uncharacterized protein OS=Oryza sativa subsp. indica OX=39946 GN=OsI_34120 PE=4 SV=1
18926	tr|B8AV03|B8AV03_ORYSI	812.5	463.051	0.57	122.71	28751	Uncharacterized protein OS=Oryza sativa subsp. indica OX=39946 GN=OsI_14804 PE=4 SV=1
29185	tr|A2WPQ4|A2WPQ4_ORYSI	2116	1205	0.57	64.61	38703	Uncharacterized protein OS=Oryza sativa subsp. indica OX=39946 GN=OsI_01835 PE=3 SV=1
20072	tr|A2X642|A2X642_ORYSI	3287	1900	0.58	113.93	39864	Uncharacterized protein OS=Oryza sativa subsp. indica OX=39946 GN=OsI_07674 PE=4 SV=1
21742	tr|B8B4L4|B8B4L4_ORYSI	8842	5122	0.58	98.01	97331	Uncharacterized protein OS=Oryza sativa subsp. indica OX=39946 GN=OsI_23693 PE=4 SV=1
23838	tr|B8B6Z6|B8B6Z6_ORYSI	444.5	259.29	0.58	83.86	57204	Uncharacterized protein OS=Oryza sativa subsp. indica OX=39946 GN=OsI_26343 PE=3 SV=1
25234	tr|A2Z482|A2Z482_ORYSI	1401	814.082	0.58	61.91	43046	Uncharacterized protein OS=Oryza sativa subsp. indica OX=39946 GN=OsI_32457 PE=4 SV=1
20641	tr|A2XID1|A2XID1_ORYSI	4426	2595	0.59	143.12	34190	Uncharacterized protein OS=Oryza sativa subsp. indica OX=39946 GN=OsI_12193 PE=4 SV=1
18425	tr|B8AR51|B8AR51_ORYSI	3344	1970	0.59	113.3	52889	Uncharacterized protein OS=Oryza sativa subsp. indica OX=39946 GN=OsI_13438 PE=4 SV=1
22071	tr|A2WS43|A2WS43_ORYSI	599	353.445	0.59	108.74	31669	Uncharacterized protein OS=Oryza sativa subsp. indica OX=39946 GN=OsI_02684 PE=4 SV=1
26848	tr|B8A845|B8A845_ORYSI	1630	957.488	0.59	66.11	17731	Uncharacterized protein OS=Oryza sativa subsp. indica OX=39946 GN=OsI_04890 PE=4 SV=1
25636	tr|A2Y8K8|A2Y8K8_ORYSI	4188	2485	0.59	51.68	37697	Uncharacterized protein OS=Oryza sativa subsp. indica OX=39946 GN=OsI_21389 PE=4 SV=1
11809	tr|B8ALJ1|B8ALJ1_ORYSI	1798	1071	0.6	219.81	24287	Uncharacterized protein OS=Oryza sativa subsp. indica OX=39946 GN=OsI_11062 PE=3 SV=1
10637	tr|B8A9G8|B8A9G8_ORYSI	1398	844.984	0.6	214.48	65008	Uncharacterized protein OS=Oryza sativa subsp. indica OX=39946 GN=OsI_03674 PE=3 SV=1
14487	tr|A2WVG2|A2WVG2_ORYSI	4366	2639	0.6	169.2	60825	Uncharacterized protein OS=Oryza sativa subsp. indica OX=39946 GN=OsI_03875 PE=4 SV=1
23709	A2Y953|ANM10_ORYSI	1274	768.694	0.6	105.44	42876	Protein arginine N-methyltransferase PRMT10 OS=Oryza sativa subsp. indica OX=39946 GN=PRMT10 PE=3 SV=1
26585	tr|A2XIP0|A2XIP0_ORYSI	2228	1343	0.6	57.25	51085	Purple acid phosphatase OS=Oryza sativa subsp. indica OX=39946 GN=OsI_12303 PE=3 SV=1
25185	tr|A2YPN4|A2YPN4_ORYSI	951.5	574.107	0.6	41.31	29522	Uncharacterized protein OS=Oryza sativa subsp. indica OX=39946 GN=OsI_27234 PE=4 SV=1
8566	tr|B8AC06|B8AC06_ORYSI	2647	1616	0.61	299.99	46149	Uncharacterized protein OS=Oryza sativa subsp. indica OX=39946 GN=OsI_04375 PE=3 SV=1
18935	tr|A2XSN4|A2XSN4_ORYSI	5432	3311	0.61	131.66	37293	Uncharacterized protein OS=Oryza sativa subsp. indica OX=39946 GN=OsI_15621 PE=4 SV=1
21308	tr|A2ZK08|A2ZK08_ORYSI	2182	1321	0.61	96.94	28755	Uncharacterized protein OS=Oryza sativa subsp. indica OX=39946 GN=OsI_38160 PE=4 SV=1
23853	tr|B8ADW9|B8ADW9_ORYSI	1538	940.106	0.61	88.82	55799	Uncharacterized protein OS=Oryza sativa subsp. indica OX=39946 GN=OsI_07653 PE=4 SV=1
23806	tr|A2XUQ8|A2XUQ8_ORYSI	1414	863.333	0.61	85.91	29933	Uncharacterized protein OS=Oryza sativa subsp. indica OX=39946 GN=OsI_16345 PE=4 SV=1
26179	tr|B8A8P3|B8A8P3_ORYSI	762.5	463.051	0.61	80.68	32482	Uncharacterized protein OS=Oryza sativa subsp. indica OX=39946 GN=OsI_03508 PE=4 SV=1
31476	tr|B8BMG8|B8BMG8_ORYSI	947	581.349	0.61	51.79	23029	Uncharacterized protein OS=Oryza sativa subsp. indica OX=39946 GN=OsI_38703 PE=4 SV=1
30453	tr|A2YP79|A2YP79_ORYSI	495.5	300.814	0.61	44.79	38306	Uncharacterized protein OS=Oryza sativa subsp. indica OX=39946 GN=OsI_27072 PE=4 SV=1
30827	A2ZAT0|NLTP2_ORYSI	566	346.685	0.61	40.88	11501	Non-specific lipid-transfer protein 2 OS=Oryza sativa subsp. indica OX=39946 GN=LTP2-A PE=3 SV=1
28602	tr|A2YGT7|A2YGT7_ORYSI	591	366.965	0.62	94.64	61876	Uncharacterized protein OS=Oryza sativa subsp. indica OX=39946 GN=OsI_24399 PE=4 SV=1
25081	tr|A2YBR3|A2YBR3_ORYSI	503	309.989	0.62	90.42	34148	Peroxidase OS=Oryza sativa subsp. indica OX=39946 GN=OsI_22542 PE=3 SV=1
25092	tr|A2ZAQ9|A2ZAQ9_ORYSI	503	309.989	0.62	90.42	34997	Peroxidase OS=Oryza sativa subsp. indica OX=39946 GN=OsI_34840 PE=3 SV=1
23750	tr|A2YRC2|A2YRC2_ORYSI	1842	1136	0.62	75.11	26140	Uncharacterized protein OS=Oryza sativa subsp. indica OX=39946 GN=OsI_27851 PE=4 SV=1
29212	tr|A2XLI5|A2XLI5_ORYSI	871.5	540.307	0.62	69.55	45746	Uncharacterized protein OS=Oryza sativa subsp. indica OX=39946 GN=OsI_13336 PE=3 SV=1
27978	tr|B8B2J6|B8B2J6_ORYSI	1257	776.42	0.62	64.09	47088	Uncharacterized protein OS=Oryza sativa subsp. indica OX=39946 GN=OsI_24498 PE=4 SV=1
26720	tr|A2YPV7|A2YPV7_ORYSI	633.5	390.624	0.62	48.19	21949	Uncharacterized protein OS=Oryza sativa subsp. indica OX=39946 GN=OsI_27311 PE=4 SV=1
14569	tr|A2XQB0|A2XQB0_ORYSI	19520	12200	0.63	184.98	35766	Uncharacterized protein OS=Oryza sativa subsp. indica OX=39946 GN=OsI_14819 PE=4 SV=1
15976	tr|A2XEP1|A2XEP1_ORYSI	2242	1420	0.63	158.04	73190	Uncharacterized protein OS=Oryza sativa subsp. indica OX=39946 GN=OsI_10803 PE=3 SV=1
19158	tr|A2XDM4|A2XDM4_ORYSI	10120	6412	0.63	116.7	29393	Uncharacterized protein OS=Oryza sativa subsp. indica OX=39946 GN=OsI_10418 PE=4 SV=1
22655	tr|A2Y472|A2Y472_ORYSI	5848	3682	0.63	111.57	19341	Uncharacterized protein OS=Oryza sativa subsp. indica OX=39946 GN=OsI_19801 PE=4 SV=1
24506	A2YNH4|6PGL2_ORYSI	1996	1255	0.63	85.23	31244	Probable 6-phosphogluconolactonase 2 OS=Oryza sativa subsp. indica OX=39946 GN=OsI_025867 PE=3 SV=1
10890	tr|B8BC76|B8BC76_ORYSI	12770	8118	0.64	218.83	108841	Uncharacterized protein OS=Oryza sativa subsp. indica OX=39946 GN=OsI_28366 PE=4 SV=1
15294	tr|B8BHU9|B8BHU9_ORYSI	1638	1048	0.64	135.28	61244	Uncharacterized protein OS=Oryza sativa subsp. indica OX=39946 GN=OsI_34292 PE=4 SV=1
22978	tr|B8B258|B8B258_ORYSI	1112	715.098	0.64	102.43	21211	Uncharacterized protein OS=Oryza sativa subsp. indica OX=39946 GN=OsI_24369 PE=4 SV=1
30601	tr|A2Y5G0|A2Y5G0_ORYSI	2912	1855	0.64	90.16	18978	Uncharacterized protein OS=Oryza sativa subsp. indica OX=39946 GN=OsI_20228 PE=3 SV=1
31260	tr|A2WWU3|A2WWU3_ORYSI	2912	1855	0.64	90.16	19014	Uncharacterized protein OS=Oryza sativa subsp. indica OX=39946 GN=OsI_04373 PE=3 SV=1
9576	tr|Q9LKM2|Q9LKM2_ORYSI	481.5	315.3	0.65	256.4	93333	Phospholipase D OS=Oryza sativa subsp. indica OX=39946 GN=RPLD4 PE=3 SV=1
28693	tr|A2X691|A2X691_ORYSI	1166	763.383	0.65	28.98	33957	Uncharacterized protein OS=Oryza sativa subsp. indica OX=39946 GN=OsI_07729 PE=4 SV=1
9540	tr|A2YG29|A2YG29_ORYSI	8174	12360	1.51	251.43	50121	Tubulin beta chain OS=Oryza sativa subsp. indica OX=39946 GN=OsI_24075 PE=3 SV=1
16120	tr|B8BNI3|B8BNI3_ORYSI	100600	151500	1.51	242	15505	Uncharacterized protein OS=Oryza sativa subsp. indica OX=39946 GN=OsI_37722 PE=4 SV=1
11683	tr|A2XTX6|A2XTX6_ORYSI	1378	2075	1.51	224.84	49166	3-oxoacyl-[acyl-carrier-protein] synthase OS=Oryza sativa subsp. indica OX=39946 GN=OsI_16057 PE=3 SV=1
12095	tr|A2XM21|A2XM21_ORYSI	1686	2548	1.51	214.03	24977	Uncharacterized protein OS=Oryza sativa subsp. indica OX=39946 GN=OsI_13529 PE=3 SV=1
19372	tr|A2YPV2|A2YPV2_ORYSI	8914	13500	1.51	160.68	14417	Uncharacterized protein OS=Oryza sativa subsp. indica OX=39946 GN=OsI_27305 PE=4 SV=1
19743	tr|A2Y7B6|A2Y7B6_ORYSI	15400	23260	1.51	149.71	10243	Uncharacterized protein OS=Oryza sativa subsp. indica OX=39946 GN=OsI_03269 PE=3 SV=1
21289	tr|A0A0U1XN36|A0A0U1XN36_ORYSI	1500	2261	1.51	119.69	22229	ABA receptor 5 OS=Oryza sativa subsp. indica OX=39946 GN=ABAR5 PE=2 SV=1
21290	tr|B8AZ74|B8AZ74_ORYSI	1500	2261	1.51	119.69	22215	Uncharacterized protein OS=Oryza sativa subsp. indica OX=39946 GN=OsI_18892 PE=4 SV=1
21253	tr|B8ADI3|B8ADI3_ORYSI	960	1447	1.51	103.74	33045	Uncharacterized protein OS=Oryza sativa subsp. indica OX=39946 GN=OsI_00605 PE=4 SV=1
21283	tr|A6N1I6|A6N1I6_ORYSI	1990	2998	1.51	100.01	12715	60S ribosomal protein l35a OS=Oryza sativa subsp. indica OX=39946 PE=2 SV=1
23485	tr|A2YLZ5|A2YLZ5_ORYSI	540.5	815.531	1.51	88.98	26520	Uncharacterized protein OS=Oryza sativa subsp. indica OX=39946 GN=OsI_26250 PE=4 SV=1
23517	tr|B8BI52|B8BI52_ORYSI	4494	6789	1.51	80.11	35881	Uncharacterized protein OS=Oryza sativa subsp. indica OX=39946 GN=OsI_34572 PE=4 SV=1
11132	tr|B8ANI2|B8ANI2_ORYSI	3620	5519	1.52	197.63	106282	Serine/threonine-protein phosphatase OS=Oryza sativa subsp. indica OX=39946 GN=OsI_12812 PE=3 SV=1
12397	tr|B8AYU7|B8AYU7_ORYSI	12860	19610	1.52	191.9	34428	Aldo-keto reductase OS=Oryza sativa subsp. indica OX=39946 GN=AKR4 PE=2 SV=1
12541	tr|B8AED8|B8AED8_ORYSI	15780	23960	1.52	184.98	49197	Uncharacterized protein OS=Oryza sativa subsp. indica OX=39946 GN=OsI_09310 PE=4 SV=1
16741	tr|A2X358|A2X358_ORYSI	20960	31810	1.52	176.96	23365	Uncharacterized protein OS=Oryza sativa subsp. indica OX=39946 GN=OsI_06639 PE=3 SV=1
19821	tr|A2X3I0|A2X3I0_ORYSI	9475	14410	1.52	141.48	15579	60S ribosomal protein L27 OS=Oryza sativa subsp. indica OX=39946 GN=OsI_06769 PE=3 SV=1
16598	tr|B8BJF6|B8BJF6_ORYSI	3794	5757	1.52	131.86	67686	Transmembrane 9 superfamily member OS=Oryza sativa subsp. indica OX=39946 GN=OsI_35351 PE=3 SV=1
19874	tr|A2WK64|A2WK64_ORYSI	3170	4821	1.52	125.48	116347	Uncharacterized protein OS=Oryza sativa subsp. indica OX=39946 GN=OsI_00213 PE=4 SV=1
18000	tr|A2Y0G8|A2Y0G8_ORYSI	5744	8710	1.52	99.63	94787	Uncharacterized protein OS=Oryza sativa subsp. indica OX=39946 GN=OsI_18483 PE=3 SV=1
24392	tr|A2XC93|A2XC93_ORYSI	735	1118	1.52	72.07	86502	Uncharacterized protein OS=Oryza sativa subsp. indica OX=39946 GN=OsI_09918 PE=4 SV=1
26832	tr|B8BJ91|B8BJ91_ORYSI	3214	4901	1.52	62.84	16626	Uncharacterized protein OS=Oryza sativa subsp. indica OX=39946 GN=OsI_35211 PE=4 SV=1
27671	tr|A2ZIC4|A2ZIC4_ORYSI	3214	4901	1.52	62.84	35423	Uncharacterized protein OS=Oryza sativa subsp. indica OX=39946 GN=OsI_37568 PE=4 SV=1
26217	tr|A2WXS7|A2WXS7_ORYSI	678.5	1028	1.52	58.92	73635	Signal recognition particle subunit SRP72 OS=Oryza sativa subsp. indica OX=39946 GN=OsI_04729 PE=3 SV=1
26267	tr|B8B362|B8B362_ORYSI	819	1245	1.52	47.19	100822	Uncharacterized protein OS=Oryza sativa subsp. indica OX=39946 GN=OsI_23209 PE=4 SV=1
14664	tr|B8AE40|B8AE40_ORYSI	24140	37020	1.53	183.42	34344	Uncharacterized protein OS=Oryza sativa subsp. indica OX=39946 GN=OsI_09264 PE=4 SV=1
16919	tr|A2YSN9|A2YSN9_ORYSI	3356	5149	1.53	120.96	28453	Uncharacterized protein OS=Oryza sativa subsp. indica OX=39946 GN=OsI_28337 PE=4 SV=1
22647	tr|B8ABL4|B8ABL4_ORYSI	1880	2874	1.53	117.16	31739	Protein YIPF OS=Oryza sativa subsp. indica OX=39946 GN=OsI_02822 PE=3 SV=1
24956	tr|B8BCY3|B8BCY3_ORYSI	10590	16220	1.53	101.7	24168	Uncharacterized protein OS=Oryza sativa subsp. indica OX=39946 GN=OsI_30399 PE=4 SV=1
27157	tr|B8A737|B8A737_ORYSI	567	867.195	1.53	58.41	58199	Uncharacterized protein OS=Oryza sativa subsp. indica OX=39946 GN=OsI_01643 PE=4 SV=1
26252	tr|B8B9Z2|B8B9Z2_ORYSI	1106	1696	1.53	55.21	67154	Pyrophosphate--fructose 6-phosphate 1-phosphotransferase subunit alpha OS=Oryza sativa subsp. indica OX=39946 GN=PFP-ALPHA PE=3 SV=1
10858	tr|A2XDL4|A2XDL4_ORYSI	7830	12070	1.54	237.97	29728	40S ribosomal protein S3a OS=Oryza sativa subsp. indica OX=39946 GN=OsI_10409 PE=3 SV=1
11548	tr|A2WZV1|A2WZV1_ORYSI	44530	68750	1.54	202.24	29865	40S ribosomal protein S4 OS=Oryza sativa subsp. indica OX=39946 GN=OsI_05494 PE=3 SV=1
13395	tr|A2XFL2|A2XFL2_ORYSI	20410	31450	1.54	199.9	38221	Uncharacterized protein OS=Oryza sativa subsp. indica OX=39946 GN=OsI_11150 PE=4 SV=1
13914	tr|B8B801|B8B801_ORYSI	1686	2600	1.54	158.16	58152	Uncharacterized protein OS=Oryza sativa subsp. indica OX=39946 GN=OsI_26672 PE=4 SV=1
15328	tr|B8AK12|B8AK12_ORYSI	4296	6619	1.54	145.42	197607	Uncharacterized protein OS=Oryza sativa subsp. indica OX=39946 GN=OsI_10738 PE=4 SV=1
16173	tr|A2YKG1|A2YKG1_ORYSI	1876	2883	1.54	140.58	66239	Glucose-6-phosphate 1-dehydrogenase OS=Oryza sativa subsp. indica OX=39946 GN=OsI_25709 PE=3 SV=1
19790	tr|B8AJB5|B8AJB5_ORYSI	2147	3310	1.54	129.16	96031	Uncharacterized protein OS=Oryza sativa subsp. indica OX=39946 GN=OsI_07566 PE=4 SV=1
22817	tr|A2YX63|A2YX63_ORYSI	837	1287	1.54	101.79	28267	Uncharacterized protein OS=Oryza sativa subsp. indica OX=39946 GN=OsI_29931 PE=4 SV=1
26933	tr|A6N0H8|A6N0H8_ORYSI	3110	4774	1.54	75.75	12329	Abscisic stress ripening protein 2 (Fragment) OS=Oryza sativa subsp. indica OX=39946 PE=2 SV=1
26935	A2ZBV1|ASR5_ORYSI	3110	4774	1.54	75.75	15465	Abscisic stress-ripening protein 5 OS=Oryza sativa subsp. indica OX=39946 GN=ASR5 PE=2 SV=1
26949	tr|A2XDL6|A2XDL6_ORYSI	1760	2704	1.54	66.63	40662	SURF1-like protein OS=Oryza sativa subsp. indica OX=39946 GN=OsI_10411 PE=3 SV=1
27941	tr|A2XAF1|A2XAF1_ORYSI	181.5	279.569	1.54	55.57	67181	Uncharacterized protein OS=Oryza sativa subsp. indica OX=39946 GN=OsI_09230 PE=4 SV=1
26737	tr|A2WUM2|A2WUM2_ORYSI	952	1466	1.54	55.34	43783	Uncharacterized protein OS=Oryza sativa subsp. indica OX=39946 GN=OsI_03574 PE=3 SV=1
30674	tr|B8AQM5|B8AQM5_ORYSI	2984	4589	1.54	52.47	20694	Uncharacterized protein OS=Oryza sativa subsp. indica OX=39946 GN=OsI_11877 PE=4 SV=1
10141	tr|B8ADJ1|B8ADJ1_ORYSI	800	1240	1.55	251.75	88557	Ubiquitin carboxyl-terminal hydrolase OS=Oryza sativa subsp. indica OX=39946 GN=OsI_00623 PE=3 SV=1
17785	P0C360|PSAC_ORYSI	405900	628700	1.55	239.32	8899	Photosystem I iron-sulfur center OS=Oryza sativa subsp. indica OX=39946 GN=psaC PE=3 SV=1
17788	tr|J3RG68|J3RG68_ORYSI	405900	628700	1.55	239.32	8899	Photosystem I iron-sulfur center OS=Oryza sativa subsp. indica OX=39946 GN=psaC PE=3 SV=1
10196	tr|A2WNJ7|A2WNJ7_ORYSI	1254	1939	1.55	236.03	50286	Tubulin beta chain OS=Oryza sativa subsp. indica OX=39946 GN=OsI_01426 PE=3 SV=1
13969	tr|B8AEP4|B8AEP4_ORYSI	17010	26280	1.55	206.89	49018	Uncharacterized protein OS=Oryza sativa subsp. indica OX=39946 GN=OsI_07862 PE=4 SV=1
18952	tr|A2Z8Y6|A2Z8Y6_ORYSI	1974	3066	1.55	199.06	25292	Uncharacterized protein OS=Oryza sativa subsp. indica OX=39946 GN=OsI_34179 PE=4 SV=1
13591	P0C487|RR4_ORYSI	33730	52180	1.55	176.41	23423	30S ribosomal protein S4 chloroplastic OS=Oryza sativa subsp. indica OX=39946 GN=rps4 PE=3 SV=1
13592	tr|J7EYN0|J7EYN0_ORYSI	33730	52180	1.55	176.41	23423	30S ribosomal protein S4 chloroplastic OS=Oryza sativa subsp. indica OX=39946 GN=rps4 PE=3 SV=1
27418	tr|J7EZD7|J7EZD7_ORYSI	36890	57050	1.55	153.47	7886	Photosystem II reaction center protein H OS=Oryza sativa subsp. indica OX=39946 GN=psbH PE=3 SV=1
27420	P0C421|PSBH_ORYSI	36890	57050	1.55	153.47	7886	Photosystem II reaction center protein H OS=Oryza sativa subsp. indica OX=39946 GN=psbH PE=3 SV=1
15149	tr|A2YAP7|A2YAP7_ORYSI	3065	4746	1.55	151.58	42438	Uncharacterized protein OS=Oryza sativa subsp. indica OX=39946 GN=OsI_22163 PE=4 SV=1
15197	tr|B8B3Z6|B8B3Z6_ORYSI	3065	4746	1.55	151.58	70959	Uncharacterized protein OS=Oryza sativa subsp. indica OX=39946 GN=OsI_22160 PE=4 SV=1
20619	P0C450|RK23_ORYSI	12240	18910	1.55	131.75	10764	50S ribosomal protein L23 chloroplastic OS=Oryza sativa subsp. indica OX=39946 GN=rpl23-A PE=3 SV=1
20628	tr|B8ABV8|B8ABV8_ORYSI	12240	18910	1.55	131.75	10764	50S ribosomal protein L23 chloroplastic OS=Oryza sativa subsp. indica OX=39946 GN=rpl23 PE=3 SV=1
20632	tr|J7F224|J7F224_ORYSI	12240	18910	1.55	131.75	13655	50S ribosomal protein L23 chloroplastic OS=Oryza sativa subsp. indica OX=39946 GN=rpl23 PE=3 SV=1
24282	tr|A2XDJ6|A2XDJ6_ORYSI	3488	5405	1.55	103.15	55505	Uncharacterized protein OS=Oryza sativa subsp. indica OX=39946 GN=OsI_10385 PE=3 SV=1
21726	tr|B8B835|B8B835_ORYSI	3598	5583	1.55	79.67	17345	Uncharacterized protein OS=Oryza sativa subsp. indica OX=39946 GN=OsI_26657 PE=4 SV=1
26024	tr|B8BJB0|B8BJB0_ORYSI	1926	2978	1.55	63.14	30501	Uncharacterized protein OS=Oryza sativa subsp. indica OX=39946 GN=OsI_35259 PE=4 SV=1
10778	tr|A2XWM3|A2XWM3_ORYSI	5272	8240	1.56	230.02	49587	Uncharacterized protein OS=Oryza sativa subsp. indica OX=39946 GN=OsI_17051 PE=3 SV=1
12661	tr|A2ZLS7|A2ZLS7_ORYSI	46160	71840	1.56	205.08	28249	Uncharacterized protein OS=Oryza sativa subsp. indica OX=39946 GN=OsI_38771 PE=3 SV=1
11652	tr|B8AGW7|B8AGW7_ORYSI	8806	13700	1.56	193.46	59099	Acetyltransferase component of pyruvate dehydrogenase complex OS=Oryza sativa subsp. indica OX=39946 GN=OsI_05488 PE=3 SV=1
27575	P0C300|ATPH_ORYSI	180200	280700	1.56	162.72	7974	ATP synthase subunit c chloroplastic OS=Oryza sativa subsp. indica OX=39946 GN=atpH PE=3 SV=1
27578	tr|J7EXL1|J7EXL1_ORYSI	180200	280700	1.56	162.72	7974	ATP synthase subunit c chloroplastic OS=Oryza sativa subsp. indica OX=39946 GN=atpH PE=3 SV=1
14229	tr|A2YUU5|A2YUU5_ORYSI	8959	13940	1.56	154.19	59640	T-complex protein 1 subunit delta OS=Oryza sativa subsp. indica OX=39946 GN=OsI_29091 PE=3 SV=1
18549	tr|A2Z1P8|A2Z1P8_ORYSI	3014	4698	1.56	135.81	58114	Uncharacterized protein OS=Oryza sativa subsp. indica OX=39946 GN=OsI_31532 PE=3 SV=1
23935	tr|A2ZMZ1|A2ZMZ1_ORYSI	940	1462	1.56	71.97	44729	Uncharacterized protein OS=Oryza sativa subsp. indica OX=39946 GN=OsI_39199 PE=4 SV=1
24279	tr|B8ADA5|B8ADA5_ORYSI	2428	3786	1.56	69.45	35809	Uncharacterized protein OS=Oryza sativa subsp. indica OX=39946 GN=OsI_00410 PE=4 SV=1
29042	tr|B8ATZ3|B8ATZ3_ORYSI	1468	2285	1.56	40.13	59456	Uncharacterized protein OS=Oryza sativa subsp. indica OX=39946 GN=OsI_15934 PE=4 SV=1
11530	tr|B8AB31|B8AB31_ORYSI	20130	31560	1.57	218.91	186976	Uncharacterized protein OS=Oryza sativa subsp. indica OX=39946 GN=OsI_01059 PE=4 SV=1
14234	tr|A2X3Z4|A2X3Z4_ORYSI	6749	10620	1.57	140.46	59974	Uncharacterized protein OS=Oryza sativa subsp. indica OX=39946 GN=OsI_06927 PE=4 SV=1
23425	tr|A2X009|A2X009_ORYSI	8086	12670	1.57	112.68	10795	Ribosomal protein L37 OS=Oryza sativa subsp. indica OX=39946 GN=OsI_05548 PE=3 SV=1
23426	tr|B8BAF5|B8BAF5_ORYSI	8086	12670	1.57	112.68	10795	Ribosomal protein L37 OS=Oryza sativa subsp. indica OX=39946 GN=OsI_27679 PE=3 SV=1
23334	tr|A2Y746|A2Y746_ORYSI	4405	6905	1.57	103.21	21687	Uncharacterized protein OS=Oryza sativa subsp. indica OX=39946 GN=OsI_20861 PE=4 SV=1
28941	tr|A2WU34|A2WU34_ORYSI	818	1285	1.57	85.85	33554	Uncharacterized protein OS=Oryza sativa subsp. indica OX=39946 GN=OsI_03380 PE=4 SV=1
24124	tr|B8ALY3|B8ALY3_ORYSI	1259	1981	1.57	65.32	51829	Uncharacterized protein OS=Oryza sativa subsp. indica OX=39946 GN=OsI_09714 PE=4 SV=1
31416	tr|A2YPU6|A2YPU6_ORYSI	10880	17040	1.57	54.37	11629	Uncharacterized protein OS=Oryza sativa subsp. indica OX=39946 GN=OsI_27299 PE=4 SV=1
18077	tr|A2WNI6|A2WNI6_ORYSI	7238	11420	1.58	136.05	105177	Coatomer subunit beta OS=Oryza sativa subsp. indica OX=39946 GN=OsI_01415 PE=4 SV=1
21292	tr|A2XCC5|A2XCC5_ORYSI	1602	2526	1.58	95.39	60626	Beta-amylase OS=Oryza sativa subsp. indica OX=39946 GN=OsI_09956 PE=3 SV=1
28110	tr|A2X7U4|A2X7U4_ORYSI	454.5	719.927	1.58	64.81	14662	Uncharacterized protein OS=Oryza sativa subsp. indica OX=39946 GN=OsI_08287 PE=3 SV=1
15339	tr|A2Y5Z6|A2Y5Z6_ORYSI	369.5	585.695	1.59	210.93	20708	Uncharacterized protein OS=Oryza sativa subsp. indica OX=39946 GN=OsI_20417 PE=3 SV=1
15340	tr|B8AB93|B8AB93_ORYSI	369.5	585.695	1.59	210.93	20681	Uncharacterized protein OS=Oryza sativa subsp. indica OX=39946 GN=OsI_04181 PE=3 SV=1
11026	tr|A2YMB7|A2YMB7_ORYSI	14330	22790	1.59	200.41	55157	Beta-amylase OS=Oryza sativa subsp. indica OX=39946 GN=OsI_26372 PE=3 SV=1
17801	tr|A2YJM2|A2YJM2_ORYSI	3880	6157	1.59	197.77	14752	40S ribosomal protein S12 OS=Oryza sativa subsp. indica OX=39946 GN=OsI_25429 PE=2 SV=1
16503	tr|A2XNL2|A2XNL2_ORYSI	32120	51020	1.59	153.75	18167	Uncharacterized protein OS=Oryza sativa subsp. indica OX=39946 GN=OsI_14156 PE=3 SV=1
19570	tr|B8BIT2|B8BIT2_ORYSI	2374	3765	1.59	115.84	47079	Uncharacterized protein OS=Oryza sativa subsp. indica OX=39946 GN=OsI_34911 PE=4 SV=1
20520	tr|B8BCL9|B8BCL9_ORYSI	2005	3179	1.59	113.9	68451	Uncharacterized protein OS=Oryza sativa subsp. indica OX=39946 GN=OsI_31662 PE=4 SV=1
20765	tr|A2X0J1|A2X0J1_ORYSI	8460	13420	1.59	107.23	27340	Uncharacterized protein OS=Oryza sativa subsp. indica OX=39946 GN=OsI_05726 PE=4 SV=1
24098	tr|B8BJ81|B8BJ81_ORYSI	1034	1644	1.59	94.46	69898	Uncharacterized protein OS=Oryza sativa subsp. indica OX=39946 GN=OsI_35198 PE=4 SV=1
24467	tr|A2WRV9|A2WRV9_ORYSI	4383	6964	1.59	92.25	19477	Uncharacterized protein OS=Oryza sativa subsp. indica OX=39946 GN=OsI_02598 PE=4 SV=1
23418	tr|B8AHL6|B8AHL6_ORYSI	2032	3223	1.59	74.95	36119	Uncharacterized protein OS=Oryza sativa subsp. indica OX=39946 GN=OsI_08681 PE=3 SV=1
12128	tr|A2XGS7|A2XGS7_ORYSI	2981	4780	1.6	214.07	24885	Uncharacterized protein OS=Oryza sativa subsp. indica OX=39946 GN=OsI_11607 PE=3 SV=1
16061	tr|A2ZM75|A2ZM75_ORYSI	4516	7247	1.6	209.5	19878	Uncharacterized protein OS=Oryza sativa subsp. indica OX=39946 GN=OsI_38931 PE=3 SV=1
14832	tr|A2XSG0|A2XSG0_ORYSI	332.5	530.65	1.6	178.93	34639	Uncharacterized protein OS=Oryza sativa subsp. indica OX=39946 GN=OsI_15552 PE=4 SV=1
19475	tr|A2XVA4|A2XVA4_ORYSI	3494	5579	1.6	141.38	22736	Uncharacterized protein OS=Oryza sativa subsp. indica OX=39946 GN=OsI_16544 PE=3 SV=1
19476	tr|Q84P57|Q84P57_ORYSI	3494	5579	1.6	141.38	22708	Adenine phosphoribosyltransferase form 2 OS=Oryza sativa subsp. indica OX=39946 PE=2 SV=1
16926	tr|B8AXH3|B8AXH3_ORYSI	4490	7175	1.6	134.39	118202	Uncharacterized protein OS=Oryza sativa subsp. indica OX=39946 GN=OsI_21230 PE=4 SV=1
17783	tr|B8AFP7|B8AFP7_ORYSI	5502	8776	1.6	134.33	68345	Lysine--tRNA ligase OS=Oryza sativa subsp. indica OX=39946 GN=OsI_08130 PE=3 SV=1
20116	tr|B8B3G1|B8B3G1_ORYSI	1349	2160	1.6	129.5	24970	Uncharacterized protein OS=Oryza sativa subsp. indica OX=39946 GN=OsI_21875 PE=3 SV=1
22338	tr|B8B8D5|B8B8D5_ORYSI	1146	1837	1.6	86.48	76213	Histone deacetylase OS=Oryza sativa subsp. indica OX=39946 GN=OsI_26768 PE=4 SV=1
24892	tr|A2WR82|A2WR82_ORYSI	960	1534	1.6	73.19	87886	Uncharacterized protein OS=Oryza sativa subsp. indica OX=39946 GN=OsI_02369 PE=3 SV=1
27898	tr|A2Z3V4|A2Z3V4_ORYSI	1433	2294	1.6	53.51	35957	Uncharacterized protein OS=Oryza sativa subsp. indica OX=39946 GN=OsI_32318 PE=4 SV=1
14839	tr|A2YZ50|A2YZ50_ORYSI	20850	33580	1.61	205.55	23617	Uncharacterized protein OS=Oryza sativa subsp. indica OX=39946 GN=OsI_30617 PE=4 SV=1
18886	tr|B8BP98|B8BP98_ORYSI	3989	6411	1.61	154.32	38838	Uncharacterized protein OS=Oryza sativa subsp. indica OX=39946 GN=OsI_38079 PE=3 SV=1
20403	tr|A2X0M4|A2X0M4_ORYSI	7492	12060	1.61	143.21	35680	Uncharacterized protein OS=Oryza sativa subsp. indica OX=39946 GN=OsI_05760 PE=4 SV=1
18491	tr|B8ADG3|B8ADG3_ORYSI	6631	10640	1.61	133.81	26855	Uncharacterized protein OS=Oryza sativa subsp. indica OX=39946 GN=OsI_00558 PE=4 SV=1
20591	tr|B8ABA2|B8ABA2_ORYSI	14200	22880	1.61	128.81	116957	Uncharacterized protein OS=Oryza sativa subsp. indica OX=39946 GN=OsI_04199 PE=4 SV=1
17537	tr|B8A7S8|B8A7S8_ORYSI	3105	4988	1.61	108.52	55246	Uncharacterized protein OS=Oryza sativa subsp. indica OX=39946 GN=OsI_04827 PE=4 SV=1
29217	tr|A2YNK3|A2YNK3_ORYSI	5026	8077	1.61	105.55	26623	Uncharacterized protein OS=Oryza sativa subsp. indica OX=39946 GN=OsI_26816 PE=4 SV=1
22926	tr|B8APG0|B8APG0_ORYSI	975.5	1575	1.61	92.57	96537	Nuclear pore protein OS=Oryza sativa subsp. indica OX=39946 GN=OsI_11561 PE=3 SV=1
21859	P0C479|RR19_ORYSI	759.5	1222	1.61	85.09	10695	30S ribosomal protein S19 chloroplastic OS=Oryza sativa subsp. indica OX=39946 GN=rps19-A PE=3 SV=1
21863	tr|J3RQ76|J3RQ76_ORYSI	759.5	1222	1.61	85.09	10695	30S ribosomal protein S19 chloroplastic OS=Oryza sativa subsp. indica OX=39946 GN=rps19 PE=3 SV=1
30663	tr|B8BFW3|B8BFW3_ORYSI	833	1342	1.61	79.66	24488	Uncharacterized protein OS=Oryza sativa subsp. indica OX=39946 GN=OsI_32859 PE=4 SV=1
25592	tr|B8AF40|B8AF40_ORYSI	345.5	555.758	1.61	65.51	45922	Uncharacterized protein OS=Oryza sativa subsp. indica OX=39946 GN=OsI_08009 PE=4 SV=1
25626	tr|B8ARI2|B8ARI2_ORYSI	2606	4199	1.61	64.67	98991	Uncharacterized protein OS=Oryza sativa subsp. indica OX=39946 GN=OsI_17950 PE=4 SV=1
31427	tr|B8BDX1|B8BDX1_ORYSI	150.5	242.873	1.61	53.53	57875	Uncharacterized protein OS=Oryza sativa subsp. indica OX=39946 GN=OsI_32184 PE=4 SV=1
10190	tr|A2YVI5|A2YVI5_ORYSI	6032	9768	1.62	261.1	41572	Malate dehydrogenase OS=Oryza sativa subsp. indica OX=39946 GN=OsI_29345 PE=3 SV=1
23694	tr|B8AZT8|B8AZT8_ORYSI	2214	3583	1.62	85.89	27405	Uncharacterized protein OS=Oryza sativa subsp. indica OX=39946 GN=OsI_20574 PE=4 SV=1
22878	tr|A2Y2M8|A2Y2M8_ORYSI	1360	2201	1.62	74.83	36589	Uncharacterized protein OS=Oryza sativa subsp. indica OX=39946 GN=OsI_19261 PE=4 SV=1
10039	tr|A2WYB3|A2WYB3_ORYSI	2420	3943	1.63	257.09	53136	Uncharacterized protein OS=Oryza sativa subsp. indica OX=39946 GN=OsI_04917 PE=4 SV=1
10382	tr|A2XVK1|A2XVK1_ORYSI	6027	9828	1.63	223.35	76039	Phenylalanine ammonia-lyase OS=Oryza sativa subsp. indica OX=39946 GN=OsI_16658 PE=3 SV=1
14388	tr|A2Z5X3|A2Z5X3_ORYSI	12300	20070	1.63	161.74	57517	Uncharacterized protein OS=Oryza sativa subsp. indica OX=39946 GN=OsI_33047 PE=3 SV=1
12738	tr|B8AE35|B8AE35_ORYSI	11000	17940	1.63	160.36	87427	Uncharacterized protein OS=Oryza sativa subsp. indica OX=39946 GN=OsI_09255 PE=4 SV=1
26755	tr|A2WXB4|A2WXB4_ORYSI	905.5	1478	1.63	86.98	9883	Uncharacterized protein OS=Oryza sativa subsp. indica OX=39946 GN=OsI_04560 PE=3 SV=1
23374	tr|A2YNM6|A2YNM6_ORYSI	553.5	903.409	1.63	77.66	16017	Uncharacterized protein OS=Oryza sativa subsp. indica OX=39946 GN=OsI_26845 PE=3 SV=1
25042	tr|A2ZEW5|A2ZEW5_ORYSI	15100	24620	1.63	67.86	11314	Uncharacterized protein OS=Oryza sativa subsp. indica OX=39946 GN=OsI_36331 PE=4 SV=1
18011	tr|B8B6D2|B8B6D2_ORYSI	1726	2828	1.64	108.5	139062	Uncharacterized protein OS=Oryza sativa subsp. indica OX=39946 GN=OsI_26082 PE=4 SV=1
27521	tr|A2ZER9|A2ZER9_ORYSI	6692	10970	1.64	79.2	11579	Acyl carrier protein OS=Oryza sativa subsp. indica OX=39946 GN=OsI_36282 PE=3 SV=1
27522	tr|A2ZES1|A2ZES1_ORYSI	6692	10970	1.64	79.2	15437	Acyl carrier protein OS=Oryza sativa subsp. indica OX=39946 GN=OsI_36284 PE=3 SV=1
28057	tr|B8AGG7|B8AGG7_ORYSI	2778	4563	1.64	51.64	51301	Uncharacterized protein OS=Oryza sativa subsp. indica OX=39946 GN=OsI_08451 PE=3 SV=1
19078	tr|A2WZ46|A2WZ46_ORYSI	247.5	408.972	1.65	125.1	52360	Uncharacterized protein OS=Oryza sativa subsp. indica OX=39946 GN=OsI_05216 PE=3 SV=1
20757	tr|B8AG23|B8AG23_ORYSI	17820	29450	1.65	116.85	46958	Uncharacterized protein OS=Oryza sativa subsp. indica OX=39946 GN=OsI_08304 PE=4 SV=1
21501	tr|A6MZL6|A6MZL6_ORYSI	17820	29450	1.65	116.85	20839	50S ribosomal protein l19 (Fragment) OS=Oryza sativa subsp. indica OX=39946 PE=2 SV=1
23822	tr|A2Y5W6|A2Y5W6_ORYSI	1330	2189	1.65	96.94	23596	Uncharacterized protein OS=Oryza sativa subsp. indica OX=39946 GN=OsI_20389 PE=4 SV=1
25936	tr|A2XNZ0|A2XNZ0_ORYSI	426.5	704.476	1.65	83.68	28101	Uncharacterized protein OS=Oryza sativa subsp. indica OX=39946 GN=OsI_14290 PE=4 SV=1
26598	tr|A2YQN5|A2YQN5_ORYSI	426.5	704.476	1.65	83.68	28268	Uncharacterized protein OS=Oryza sativa subsp. indica OX=39946 GN=OsI_27604 PE=4 SV=1
28639	tr|A2YY05|A2YY05_ORYSI	872	1436	1.65	45.32	14976	7 8-dihydroneopterin aldolase OS=Oryza sativa subsp. indica OX=39946 GN=OsI_30221 PE=3 SV=1
13230	tr|A2XMI1|A2XMI1_ORYSI	187500	311800	1.66	274.93	24767	Uncharacterized protein OS=Oryza sativa subsp. indica OX=39946 GN=OsI_13733 PE=4 SV=1
15862	tr|B8AE20|B8AE20_ORYSI	8940	14850	1.66	170.49	32009	Eukaryotic translation initiation factor 3 subunit G OS=Oryza sativa subsp. indica OX=39946 GN=OsI_09223 PE=3 SV=1
21943	tr|A2ZAB3|A2ZAB3_ORYSI	2910	4823	1.66	115.59	15472	60S ribosomal protein L27 OS=Oryza sativa subsp. indica OX=39946 GN=OsI_34676 PE=2 SV=1
17728	tr|A2WLL3|A2WLL3_ORYSI	1066	1765	1.66	107	57841	ATP-dependent 6-phosphofructokinase OS=Oryza sativa subsp. indica OX=39946 GN=PFK PE=3 SV=1
29449	tr|B8AWU3|B8AWU3_ORYSI	1938	3222	1.66	92.66	18897	Uncharacterized protein OS=Oryza sativa subsp. indica OX=39946 GN=OsI_21063 PE=4 SV=1
25316	tr|A2WLY6|A2WLY6_ORYSI	1402	2331	1.66	89.91	65511	Uncharacterized protein OS=Oryza sativa subsp. indica OX=39946 GN=OsI_00855 PE=4 SV=1
29174	B8AAM2|GDT11_ORYSI	2457	4086	1.66	75.58	35001	GDT1-like protein 1 chloroplastic OS=Oryza sativa subsp. indica OX=39946 GN=OsI_00941 PE=3 SV=2
22110	tr|B8B562|B8B562_ORYSI	3804	6317	1.66	67.5	63103	Uncharacterized protein OS=Oryza sativa subsp. indica OX=39946 GN=OsI_27097 PE=4 SV=1
22111	tr|B8B540|B8B540_ORYSI	3804	6317	1.66	67.5	50561	Uncharacterized protein OS=Oryza sativa subsp. indica OX=39946 GN=OsI_27061 PE=4 SV=1
22535	tr|A2YBH2|A2YBH2_ORYSI	30090	50270	1.67	189.95	16666	Putative curvature thylakoid 1A OS=Oryza sativa subsp. indica OX=39946 GN=CURT1A PE=2 SV=1
13861	tr|B8B9L7|B8B9L7_ORYSI	7544	12610	1.67	181.55	66173	Uncharacterized protein OS=Oryza sativa subsp. indica OX=39946 GN=OsI_30302 PE=4 SV=1
14542	tr|A2YVI4|A2YVI4_ORYSI	13000	21720	1.67	158.36	24828	Uncharacterized protein OS=Oryza sativa subsp. indica OX=39946 GN=OsI_29344 PE=3 SV=1
22634	tr|A2XK84|A2XK84_ORYSI	2772	4642	1.67	70.01	33521	Uncharacterized protein OS=Oryza sativa subsp. indica OX=39946 GN=OsI_12856 PE=3 SV=1
25879	tr|A2YMX9|A2YMX9_ORYSI	1376	2293	1.67	49.55	64305	Beta-hexosaminidase OS=Oryza sativa subsp. indica OX=39946 GN=OsI_26587 PE=3 SV=1
19468	tr|A2WWQ4|A2WWQ4_ORYSI	20870	35040	1.68	142.53	15660	Uncharacterized protein OS=Oryza sativa subsp. indica OX=39946 GN=OsI_04329 PE=3 SV=1
15772	tr|B8ATU3|B8ATU3_ORYSI	3263	5483	1.68	124.39	28361	Uncharacterized protein OS=Oryza sativa subsp. indica OX=39946 GN=OsI_17293 PE=4 SV=1
26784	tr|A2Y3C4|A2Y3C4_ORYSI	29750	50110	1.68	116.01	16487	Uncharacterized protein OS=Oryza sativa subsp. indica OX=39946 GN=OsI_19510 PE=4 SV=1
21269	tr|A2Y7A6|A2Y7A6_ORYSI	2772	4663	1.68	100.44	12661	Uncharacterized protein OS=Oryza sativa subsp. indica OX=39946 GN=OsI_20924 PE=3 SV=1
25002	tr|A2Y2A7|A2Y2A7_ORYSI	1236	2074	1.68	61.54	57788	Uncharacterized protein OS=Oryza sativa subsp. indica OX=39946 GN=OsI_19136 PE=3 SV=1
29197	tr|B8ALV2|B8ALV2_ORYSI	1370	2298	1.68	53.5	48269	Uncharacterized protein OS=Oryza sativa subsp. indica OX=39946 GN=OsI_09733 PE=3 SV=1
22939	tr|A2YN19|A2YN19_ORYSI	6804	11490	1.69	105.63	54403	Uncharacterized protein OS=Oryza sativa subsp. indica OX=39946 GN=OsI_26629 PE=3 SV=1
22279	tr|A2ZMS9|A2ZMS9_ORYSI	2634	4447	1.69	98.03	78678	Uncharacterized protein OS=Oryza sativa subsp. indica OX=39946 GN=OsI_39137 PE=4 SV=1
23988	tr|B8ARS8|B8ARS8_ORYSI	591	1000	1.69	65.37	42840	Uncharacterized protein OS=Oryza sativa subsp. indica OX=39946 GN=OsI_17980 PE=4 SV=1
23993	tr|B8ARS4|B8ARS4_ORYSI	591	1000	1.69	65.37	48577	Uncharacterized protein OS=Oryza sativa subsp. indica OX=39946 GN=OsI_17974 PE=4 SV=1
25767	tr|A2WMJ3|A2WMJ3_ORYSI	1496	2528	1.69	56.55	42107	Uncharacterized protein OS=Oryza sativa subsp. indica OX=39946 GN=OsI_01062 PE=4 SV=1
31525	tr|B8A916|B8A916_ORYSI	415.5	701.579	1.69	50.87	7362	Uncharacterized protein OS=Oryza sativa subsp. indica OX=39946 GN=OsI_03631 PE=4 SV=1
5380	tr|B8BIX0|B8BIX0_ORYSI	780.5	1323	1.7	167.72	70027	Uncharacterized protein OS=Oryza sativa subsp. indica OX=39946 GN=OsI_34972 PE=4 SV=1
21260	tr|B8BB05|B8BB05_ORYSI	1224	2076	1.7	126.1	48794	Dihydrolipoamide acetyltransferase component of pyruvate dehydrogenase complex OS=Oryza sativa subsp. indica OX=39946 GN=OsI_29326 PE=3 SV=1
26815	tr|A2XZZ6|A2XZZ6_ORYSI	567	966.179	1.7	77.03	45579	Metal/metalloid transporter protein OS=Oryza sativa subsp. indica OX=39946 GN=MTP1 PE=2 SV=1
27139	tr|B8B0T2|B8B0T2_ORYSI	564	957.971	1.7	74.74	37474	Uncharacterized protein OS=Oryza sativa subsp. indica OX=39946 GN=OsI_23929 PE=4 SV=1
17848	tr|J7EXM4|J7EXM4_ORYSI	10390	17780	1.71	154.96	24728	ATP-dependent Clp protease proteolytic subunit OS=Oryza sativa subsp. indica OX=39946 GN=clpP PE=3 SV=1
17854	P0C313|CLPP_ORYSI	10390	17780	1.71	154.96	24728	ATP-dependent Clp protease proteolytic subunit OS=Oryza sativa subsp. indica OX=39946 GN=clpP PE=3 SV=1
17544	tr|B8ACJ7|B8ACJ7_ORYSI	6411	10960	1.71	125.62	51415	Uncharacterized protein OS=Oryza sativa subsp. indica OX=39946 GN=OsI_01398 PE=4 SV=1
21761	tr|B8AZD7|B8AZD7_ORYSI	2448	4185	1.71	85.88	61315	Eukaryotic translation initiation factor 3 subunit L OS=Oryza sativa subsp. indica OX=39946 GN=OsI_18958 PE=3 SV=1
29747	tr|A2Z174|A2Z174_ORYSI	246.5	421.527	1.71	48.49	45114	Uncharacterized protein OS=Oryza sativa subsp. indica OX=39946 GN=OsI_31351 PE=4 SV=1
17871	tr|B8AU50|B8AU50_ORYSI	22640	38960	1.72	163.13	17836	Uncharacterized protein OS=Oryza sativa subsp. indica OX=39946 GN=OsI_17372 PE=3 SV=1
17877	tr|A2XXG3|A2XXG3_ORYSI	22640	38960	1.72	163.13	18773	Uncharacterized protein OS=Oryza sativa subsp. indica OX=39946 GN=OsI_17369 PE=3 SV=1
21429	tr|B8AN46|B8AN46_ORYSI	1503	2586	1.72	124.55	54830	Uncharacterized protein OS=Oryza sativa subsp. indica OX=39946 GN=OsI_12699 PE=4 SV=1
24114	tr|A2Z942|A2Z942_ORYSI	1910	3279	1.72	77.18	18660	Uncharacterized protein OS=Oryza sativa subsp. indica OX=39946 GN=OsI_34233 PE=4 SV=1
9518	A1XBB7|IN21B_ORYSI	10630	18400	1.73	252.82	27361	Protein IN2-1 homolog B OS=Oryza sativa subsp. indica OX=39946 GN=GSTZ5 PE=1 SV=1
12476	tr|A2WL16|A2WL16_ORYSI	1568	2719	1.73	208.36	35398	Uncharacterized protein OS=Oryza sativa subsp. indica OX=39946 GN=OsI_00528 PE=4 SV=1
12731	tr|A2X6N1|A2X6N1_ORYSI	35590	61570	1.73	181.06	24258	60S ribosomal protein L6 OS=Oryza sativa subsp. indica OX=39946 GN=OsI_07870 PE=3 SV=1
21604	tr|A2XF36|A2XF36_ORYSI	2187	3782	1.73	116.09	72040	Uncharacterized protein OS=Oryza sativa subsp. indica OX=39946 GN=OsI_10952 PE=4 SV=1
21656	tr|B8B1V3|B8B1V3_ORYSI	8236	14290	1.73	99.55	20796	Uncharacterized protein OS=Oryza sativa subsp. indica OX=39946 GN=OsI_24210 PE=3 SV=1
30668	tr|B8B3F7|B8B3F7_ORYSI	903	1565	1.73	49.58	15996	Uncharacterized protein OS=Oryza sativa subsp. indica OX=39946 GN=OsI_21871 PE=4 SV=1
24983	tr|A2YWU4|A2YWU4_ORYSI	483	841.122	1.74	50.18	41949	Uncharacterized protein OS=Oryza sativa subsp. indica OX=39946 GN=OsI_29809 PE=4 SV=1
13655	tr|B8B4C0|B8B4C0_ORYSI	650.5	1141	1.75	153.76	46838	Uncharacterized protein OS=Oryza sativa subsp. indica OX=39946 GN=OsI_23597 PE=3 SV=1
21007	tr|B8AJD1|B8AJD1_ORYSI	6411	11230	1.75	100.11	20263	Uncharacterized protein OS=Oryza sativa subsp. indica OX=39946 GN=OsI_07603 PE=4 SV=1
12527	tr|A2Y4Z1|A2Y4Z1_ORYSI	2566	4523	1.76	198.97	58123	Amidophosphoribosyltransferase OS=Oryza sativa subsp. indica OX=39946 GN=OsI_20066 PE=3 SV=1
16026	tr|A2WV25|A2WV25_ORYSI	29320	51490	1.76	187.72	26244	Uncharacterized protein OS=Oryza sativa subsp. indica OX=39946 GN=OsI_03735 PE=3 SV=1
15073	tr|B8AYY5|B8AYY5_ORYSI	4352	7676	1.76	174.24	44782	Uncharacterized protein OS=Oryza sativa subsp. indica OX=39946 GN=OsI_18722 PE=4 SV=1
16155	tr|A2Z2X9|A2Z2X9_ORYSI	15290	26850	1.76	149.17	29304	Uncharacterized protein OS=Oryza sativa subsp. indica OX=39946 GN=OsI_28791 PE=4 SV=1
23009	tr|A2Y0X0|A2Y0X0_ORYSI	5948	10450	1.76	94.62	28561	Uncharacterized protein OS=Oryza sativa subsp. indica OX=39946 GN=OsI_18646 PE=4 SV=1
23332	tr|A2XB50|A2XB50_ORYSI	5948	10450	1.76	94.62	32403	Uncharacterized protein OS=Oryza sativa subsp. indica OX=39946 GN=OsI_09490 PE=3 SV=1
23489	tr|A2YCV5|A2YCV5_ORYSI	1426	2507	1.76	90.42	79533	Uncharacterized protein OS=Oryza sativa subsp. indica OX=39946 GN=OsI_22945 PE=4 SV=1
23902	tr|B8AD25|B8AD25_ORYSI	972.5	1707	1.76	87.34	63317	Uncharacterized protein OS=Oryza sativa subsp. indica OX=39946 GN=OsI_00236 PE=4 SV=1
25395	tr|A2XNE2|A2XNE2_ORYSI	408.5	719.927	1.76	76.29	57926	Uncharacterized protein OS=Oryza sativa subsp. indica OX=39946 GN=OsI_14079 PE=3 SV=1
23698	tr|A2XVE6|A2XVE6_ORYSI	1350	2381	1.76	72.71	49852	Uncharacterized protein OS=Oryza sativa subsp. indica OX=39946 GN=OsI_16591 PE=4 SV=1
25192	tr|B8AVX6|B8AVX6_ORYSI	1185	2088	1.76	54.3	40257	Uncharacterized protein OS=Oryza sativa subsp. indica OX=39946 GN=OsI_17778 PE=4 SV=1
29820	tr|A2YRG0|A2YRG0_ORYSI	157.5	276.672	1.76	31.55	37942	Uncharacterized protein OS=Oryza sativa subsp. indica OX=39946 GN=OsI_27900 PE=4 SV=1
10181	P0C484|RR3_ORYSI	53780	95440	1.77	256.56	27518	30S ribosomal protein S3 chloroplastic OS=Oryza sativa subsp. indica OX=39946 GN=rps3 PE=3 SV=1
10188	tr|B8B5K8|B8B5K8_ORYSI	53780	95440	1.77	256.56	27518	30S ribosomal protein S3 chloroplastic OS=Oryza sativa subsp. indica OX=39946 GN=rps3 PE=3 SV=1
18981	tr|B8B9T3|B8B9T3_ORYSI	2720	4824	1.77	96.94	61696	Uncharacterized protein OS=Oryza sativa subsp. indica OX=39946 GN=OsI_28827 PE=4 SV=1
28212	tr|A2WQW5|A2WQW5_ORYSI	1918	3401	1.77	66.11	71024	Uncharacterized protein OS=Oryza sativa subsp. indica OX=39946 GN=OsI_02248 PE=4 SV=1
8849	tr|D0TZE6|D0TZE6_ORYSI	109900	195500	1.78	296	67364	Starch synthase chloroplastic/amyloplastic OS=Oryza sativa subsp. indica OX=39946 GN=GBSSII PE=3 SV=1
8869	tr|B8B5F4|B8B5F4_ORYSI	109900	195500	1.78	296	67292	Starch synthase chloroplastic/amyloplastic OS=Oryza sativa subsp. indica OX=39946 GN=GBSSII PE=3 SV=1
16402	tr|B8BP88|B8BP88_ORYSI	7672	13680	1.78	137.47	68610	Uncharacterized protein OS=Oryza sativa subsp. indica OX=39946 GN=OsI_38062 PE=4 SV=1
20053	tr|A2X8B7|A2X8B7_ORYSI	4166	7465	1.79	146.39	23552	2-C-methyl-D-erythritol 2 4-cyclodiphosphate synthase OS=Oryza sativa subsp. indica OX=39946 GN=OsI_08475 PE=3 SV=1
17325	A2WKS5|H2B8_ORYSI	2164	3880	1.79	144.12	16488	Histone H2B.8 OS=Oryza sativa subsp. indica OX=39946 GN=H2B.8 PE=3 SV=1
17326	A2WKT1|H2B6_ORYSI	2164	3880	1.79	144.12	16474	Histone H2B.6 OS=Oryza sativa subsp. indica OX=39946 GN=H2B.6 PE=3 SV=1
23947	tr|A2Z9K8|A2Z9K8_ORYSI	278.5	499.748	1.79	128.6	25427	Uncharacterized protein OS=Oryza sativa subsp. indica OX=39946 GN=OsI_34418 PE=3 SV=1
17090	tr|D0TZM7|D0TZM7_ORYSI	4516	8080	1.79	111.06	70952	Starch synthase chloroplastic/amyloplastic OS=Oryza sativa subsp. indica OX=39946 GN=SSI PE=3 SV=1
17093	tr|D0TZM6|D0TZM6_ORYSI	4516	8080	1.79	111.06	70948	Starch synthase chloroplastic/amyloplastic OS=Oryza sativa subsp. indica OX=39946 GN=SSI PE=3 SV=1
17095	tr|D0TZM8|D0TZM8_ORYSI	4516	8080	1.79	111.06	70953	Starch synthase chloroplastic/amyloplastic OS=Oryza sativa subsp. indica OX=39946 GN=SSI PE=3 SV=1
17097	A2Y9M4|SSY1_ORYSI	4516	8080	1.79	111.06	70953	Soluble starch synthase 1 chloroplastic/amyloplastic OS=Oryza sativa subsp. indica OX=39946 GN=OsI_021017 PE=2 SV=1
22745	tr|A2Z3A4|A2Z3A4_ORYSI	1531	2735	1.79	104.97	35617	Rhomboid-like protein OS=Oryza sativa subsp. indica OX=39946 GN=OsI_32104 PE=3 SV=1
29008	tr|B8BAX7|B8BAX7_ORYSI	2818	5059	1.79	77.62	12526	NADH dehydrogenase [ubiquinone] iron-sulfur protein 6 mitochondrial OS=Oryza sativa subsp. indica OX=39946 GN=OsI_27911 PE=3 SV=1
24668	tr|B8ADW8|B8ADW8_ORYSI	592.5	1063	1.79	68.23	101439	Coatomer subunit beta' OS=Oryza sativa subsp. indica OX=39946 GN=OsI_06329 PE=3 SV=1
24672	tr|B8AE85|B8AE85_ORYSI	592.5	1063	1.79	68.23	103780	Coatomer subunit beta' OS=Oryza sativa subsp. indica OX=39946 GN=OsI_06330 PE=3 SV=1
24147	tr|A2YLD6|A2YLD6_ORYSI	367	657.639	1.79	58.38	40737	Uncharacterized protein OS=Oryza sativa subsp. indica OX=39946 GN=OsI_26031 PE=4 SV=1
26126	tr|A2XVL9|A2XVL9_ORYSI	252.5	452.429	1.79	37.11	46420	Uncharacterized protein OS=Oryza sativa subsp. indica OX=39946 GN=OsI_16679 PE=4 SV=1
32102	tr|A2YCX9|A2YCX9_ORYSI	1732	3093	1.79	22.55	7722	Uncharacterized protein OS=Oryza sativa subsp. indica OX=39946 GN=OsI_22970 PE=4 SV=1
26103	tr|A2XKS7|A2XKS7_ORYSI	2366	4263	1.8	92.23	11124	Uncharacterized protein OS=Oryza sativa subsp. indica OX=39946 GN=OsI_13066 PE=4 SV=1
11915	tr|A2XWH5|A2XWH5_ORYSI	9897	17950	1.81	194.95	50564	Glycosyltransferase OS=Oryza sativa subsp. indica OX=39946 GN=OsI_17003 PE=3 SV=1
15335	Q40642|CML1_ORYSI	6950	12560	1.81	153.94	20973	Calmodulin-like protein 1 OS=Oryza sativa subsp. indica OX=39946 GN=CML1 PE=1 SV=1
14363	tr|B8ACZ5|B8ACZ5_ORYSI	5916	10680	1.81	138.18	113870	Eukaryotic translation initiation factor 3 subunit A OS=Oryza sativa subsp. indica OX=39946 GN=OsI_00169 PE=3 SV=1
19142	tr|B8A8F0|B8A8F0_ORYSI	4392	7960	1.81	109.71	94535	Uncharacterized protein OS=Oryza sativa subsp. indica OX=39946 GN=OsI_04962 PE=3 SV=1
22061	tr|B8BAX3|B8BAX3_ORYSI	1340	2419	1.81	95.15	117731	Uncharacterized protein OS=Oryza sativa subsp. indica OX=39946 GN=OsI_27901 PE=4 SV=1
23024	tr|B8AJE2|B8AJE2_ORYSI	772.5	1400	1.81	83.46	66698	Transmembrane 9 superfamily member OS=Oryza sativa subsp. indica OX=39946 GN=OsI_07622 PE=3 SV=1
27694	tr|A2WTG8|A2WTG8_ORYSI	2663	4826	1.81	68.87	17972	Iron-sulfur cluster assembly protein OS=Oryza sativa subsp. indica OX=39946 GN=OsI_03151 PE=3 SV=1
30899	tr|A2XWZ5|A2XWZ5_ORYSI	1544	2790	1.81	49.34	9889	Uncharacterized protein OS=Oryza sativa subsp. indica OX=39946 GN=OsI_17187 PE=4 SV=1
27806	tr|B8AMV1|B8AMV1_ORYSI	202.5	366.482	1.81	38.96	65921	Uncharacterized protein OS=Oryza sativa subsp. indica OX=39946 GN=OsI_09936 PE=4 SV=1
32351	tr|A2Y1P4|A2Y1P4_ORYSI	170.5	308.54	1.81	26.64	39912	Post-GPI attachment to proteins factor 3 OS=Oryza sativa subsp. indica OX=39946 GN=OsI_18926 PE=3 SV=1
16518	tr|A2YMZ1|A2YMZ1_ORYSI	164.5	299.849	1.82	211.47	28209	Chlorophyll a-b binding protein chloroplastic OS=Oryza sativa subsp. indica OX=39946 GN=OsI_26600 PE=3 SV=1
23609	tr|B8B389|B8B389_ORYSI	2320	4222	1.82	89.43	97822	AP-1 complex subunit gamma OS=Oryza sativa subsp. indica OX=39946 GN=OsI_21821 PE=3 SV=1
26109	tr|A2XEN1|A2XEN1_ORYSI	492	896.166	1.82	69.97	38992	Uncharacterized protein OS=Oryza sativa subsp. indica OX=39946 GN=OsI_10791 PE=4 SV=1
24406	tr|B8B590|B8B590_ORYSI	1196	2173	1.82	59.04	95085	Uncharacterized protein OS=Oryza sativa subsp. indica OX=39946 GN=OsI_25697 PE=4 SV=1
17762	tr|A2YAZ8|A2YAZ8_ORYSI	6112	11160	1.83	202.3	41663	Uncharacterized protein OS=Oryza sativa subsp. indica OX=39946 GN=OsI_22270 PE=4 SV=1
14628	tr|A2Y7H9|A2Y7H9_ORYSI	2965	5431	1.83	143.53	21459	60S ribosomal protein L18a OS=Oryza sativa subsp. indica OX=39946 GN=OsI_20997 PE=3 SV=1
29424	tr|B8AUD1|B8AUD1_ORYSI	382.5	699.647	1.83	49.51	63483	Peptidylprolyl isomerase OS=Oryza sativa subsp. indica OX=39946 GN=OsI_16064 PE=4 SV=1
14989	tr|B8AHZ6|B8AHZ6_ORYSI	1360	2503	1.84	204.79	24829	40S ribosomal protein S8 OS=Oryza sativa subsp. indica OX=39946 GN=OsI_07259 PE=3 SV=1
23391	tr|A2YGK4|A2YGK4_ORYSI	591.5	1091	1.84	101.51	36065	Peroxidase OS=Oryza sativa subsp. indica OX=39946 GN=OsI_24309 PE=3 SV=1
23392	tr|A7LBL0|A7LBL0_ORYSI	591.5	1091	1.84	101.51	36001	Peroxidase OS=Oryza sativa subsp. indica OX=39946 GN=LOC_Os06g48030 PE=2 SV=1
26860	tr|B8AK87|B8AK87_ORYSI	1182	2188	1.85	89.6	32546	Uncharacterized protein OS=Oryza sativa subsp. indica OX=39946 GN=OsI_13623 PE=4 SV=1
17002	tr|B8BN11|B8BN11_ORYSI	676	1254	1.86	129.34	42092	Uncharacterized protein OS=Oryza sativa subsp. indica OX=39946 GN=OsI_39129 PE=4 SV=1
8138	tr|A2ZKK1|A2ZKK1_ORYSI	2350	4361	1.86	125.3	20444	Uncharacterized protein OS=Oryza sativa subsp. indica OX=39946 GN=OsI_38348 PE=4 SV=1
21273	tr|A2ZKK2|A2ZKK2_ORYSI	2350	4361	1.86	125.3	16446	Uncharacterized protein OS=Oryza sativa subsp. indica OX=39946 GN=OsI_38349 PE=4 SV=1
9996	tr|A2YW09|A2YW09_ORYSI	528.5	990.322	1.87	260.39	58189	Glutamate decarboxylase OS=Oryza sativa subsp. indica OX=39946 GN=OsI_29517 PE=3 SV=1
18690	tr|B8ABC6|B8ABC6_ORYSI	502.5	940.106	1.87	178.58	35524	Uncharacterized protein OS=Oryza sativa subsp. indica OX=39946 GN=OsI_04240 PE=4 SV=1
15760	tr|B8AFQ7|B8AFQ7_ORYSI	717.5	1343	1.87	129.22	78348	Phenylalanine ammonia-lyase OS=Oryza sativa subsp. indica OX=39946 GN=OsI_08144 PE=3 SV=1
17724	A2ZB00|RS16_ORYSI	18700	34980	1.87	115.3	16819	40S ribosomal protein S16 OS=Oryza sativa subsp. indica OX=39946 GN=RPS16A PE=2 SV=1
25813	tr|A2WSM1|A2WSM1_ORYSI	1070	2002	1.87	82.17	102111	Uncharacterized protein OS=Oryza sativa subsp. indica OX=39946 GN=OsI_02864 PE=4 SV=1
25894	tr|A2YPU4|A2YPU4_ORYSI	1297	2424	1.87	53.89	17933	Uncharacterized protein OS=Oryza sativa subsp. indica OX=39946 GN=OsI_27297 PE=4 SV=1
25909	tr|Q8S388|Q8S388_ORYSI	1297	2424	1.87	53.89	18033	Putative universal stress protein USP1 OS=Oryza sativa subsp. indica OX=39946 GN=Usp1 PE=2 SV=1
12736	tr|A2Y7W1|A2Y7W1_ORYSI	9903	18630	1.88	192.44	57654	Glucose-1-phosphate adenylyltransferase OS=Oryza sativa subsp. indica OX=39946 GN=AGPlar PE=3 SV=1
25159	A2ZN77|SUT2_ORYSI	1300	2450	1.88	97.02	53181	Sucrose transport protein SUT2 OS=Oryza sativa subsp. indica OX=39946 GN=SUT2 PE=2 SV=2
31559	tr|B8APT0|B8APT0_ORYSI	544.5	1028	1.89	43.02	24690	Uncharacterized protein OS=Oryza sativa subsp. indica OX=39946 GN=OsI_11605 PE=4 SV=1
21730	tr|A2YIV1|A2YIV1_ORYSI	24980	47350	1.9	129.53	17415	Uncharacterized protein OS=Oryza sativa subsp. indica OX=39946 GN=OsI_25153 PE=3 SV=1
22718	tr|A6MZB5|A6MZB5_ORYSI	24980	47350	1.9	129.53	17328	40S ribosomal protein S15 OS=Oryza sativa subsp. indica OX=39946 PE=2 SV=1
22720	tr|A2XMY4|A2XMY4_ORYSI	24980	47350	1.9	129.53	19658	Uncharacterized protein OS=Oryza sativa subsp. indica OX=39946 GN=OsI_13912 PE=3 SV=1
18734	tr|B8B024|B8B024_ORYSI	1886	3581	1.9	124.47	62485	ATP-dependent 6-phosphofructokinase OS=Oryza sativa subsp. indica OX=39946 GN=PFK PE=3 SV=1
22122	tr|A6MZK4|A6MZK4_ORYSI	7472	14190	1.9	116.11	16606	60S ribosomal protein l28 OS=Oryza sativa subsp. indica OX=39946 PE=2 SV=1
22124	tr|A2Y715|A2Y715_ORYSI	7472	14190	1.9	116.11	17452	Uncharacterized protein OS=Oryza sativa subsp. indica OX=39946 GN=OsI_20825 PE=4 SV=1
26275	tr|A2XGQ6|A2XGQ6_ORYSI	1882	3570	1.9	80.79	14770	Acyl carrier protein OS=Oryza sativa subsp. indica OX=39946 GN=OsI_11586 PE=3 SV=1
26866	tr|A2XNI6|A2XNI6_ORYSI	2396	4582	1.91	59.88	31008	Uncharacterized protein OS=Oryza sativa subsp. indica OX=39946 GN=OsI_14129 PE=4 SV=1
26810	tr|B8BM59|B8BM59_ORYSI	898	1718	1.91	54.16	24148	Uncharacterized protein OS=Oryza sativa subsp. indica OX=39946 GN=OsI_38514 PE=4 SV=1
21158	tr|A2WXG4|A2WXG4_ORYSI	536	1031	1.92	114.08	120786	5'-3' exoribonuclease OS=Oryza sativa subsp. indica OX=39946 GN=OsI_04616 PE=3 SV=1
25692	tr|B8BPT0|B8BPT0_ORYSI	520	998.53	1.92	44.61	52324	Uncharacterized protein OS=Oryza sativa subsp. indica OX=39946 GN=OsI_38430 PE=4 SV=1
29450	tr|A2YN50|A2YN50_ORYSI	955	1830	1.92	33.44	42509	Uncharacterized protein OS=Oryza sativa subsp. indica OX=39946 GN=OsI_26662 PE=4 SV=1
20949	tr|A2WUC2|A2WUC2_ORYSI	1042	2009	1.93	84.7	55802	Uncharacterized protein OS=Oryza sativa subsp. indica OX=39946 GN=OsI_03472 PE=3 SV=1
26520	tr|A2YK70|A2YK70_ORYSI	1462	2818	1.93	77.42	10926	Uncharacterized protein OS=Oryza sativa subsp. indica OX=39946 GN=OsI_25619 PE=4 SV=1
14498	tr|A2XJ89|A2XJ89_ORYSI	26410	51240	1.94	178.43	24333	Ribosomal protein L15 OS=Oryza sativa subsp. indica OX=39946 GN=OsI_12513 PE=3 SV=1
14561	tr|B8AW24|B8AW24_ORYSI	26410	51240	1.94	178.43	42585	Ribosomal protein L15 OS=Oryza sativa subsp. indica OX=39946 GN=OsI_19264 PE=3 SV=1
18968	tr|A2X835|A2X835_ORYSI	3629	7089	1.95	166.77	30760	Uncharacterized protein OS=Oryza sativa subsp. indica OX=39946 GN=OsI_08388 PE=3 SV=1
14859	tr|A2XYG6|A2XYG6_ORYSI	9544	18750	1.96	176.91	46382	Uncharacterized protein OS=Oryza sativa subsp. indica OX=39946 GN=OsI_17742 PE=3 SV=1
30840	tr|B8ADS2|B8ADS2_ORYSI	1968	3851	1.96	85.85	57368	MLO-like protein OS=Oryza sativa subsp. indica OX=39946 GN=MLO PE=3 SV=1
24530	tr|B8B3W6|B8B3W6_ORYSI	399.5	782.214	1.96	78.61	43517	Uncharacterized protein OS=Oryza sativa subsp. indica OX=39946 GN=OsI_22080 PE=3 SV=1
31712	tr|A2XQN6|A2XQN6_ORYSI	425.5	834.845	1.96	35.62	41576	Flavin-containing monooxygenase OS=Oryza sativa subsp. indica OX=39946 GN=OsI_14952 PE=3 SV=1
31713	tr|B8AVP3|B8AVP3_ORYSI	425.5	834.845	1.96	35.62	58778	Flavin-containing monooxygenase OS=Oryza sativa subsp. indica OX=39946 GN=OsI_14950 PE=3 SV=1
25631	tr|A2WVZ2|A2WVZ2_ORYSI	590	1160	1.97	55.88	32433	Uncharacterized protein OS=Oryza sativa subsp. indica OX=39946 GN=OsI_04066 PE=4 SV=1
25478	tr|A2XQC5|A2XQC5_ORYSI	192.5	381.933	1.98	102.32	66554	Uncharacterized protein OS=Oryza sativa subsp. indica OX=39946 GN=OsI_14836 PE=4 SV=1
22644	tr|B8B032|B8B032_ORYSI	769.5	1524	1.98	72.23	112535	Uncharacterized protein OS=Oryza sativa subsp. indica OX=39946 GN=OsI_19210 PE=4 SV=1
31613	tr|A2WYZ2|A2WYZ2_ORYSI	467.5	928.517	1.99	62.95	55992	Uncharacterized protein OS=Oryza sativa subsp. indica OX=39946 GN=OsI_05158 PE=4 SV=1
16524	tr|A2YZH8|A2YZH8_ORYSI	113.5	227.422	2	143.83	99664	Uncharacterized protein OS=Oryza sativa subsp. indica OX=39946 GN=OsI_30761 PE=4 SV=1
19894	tr|B8AU33|B8AU33_ORYSI	1978	3953	2	98.92	62438	Uncharacterized protein OS=Oryza sativa subsp. indica OX=39946 GN=OsI_15928 PE=4 SV=1
20145	tr|B8AZ55|B8AZ55_ORYSI	2032	4082	2.01	128.01	114585	Uncharacterized protein OS=Oryza sativa subsp. indica OX=39946 GN=OsI_18854 PE=4 SV=1
18092	tr|B8AD31|B8AD31_ORYSI	2176	4375	2.01	121.88	102551	Uncharacterized protein OS=Oryza sativa subsp. indica OX=39946 GN=OsI_00249 PE=3 SV=1
22849	tr|A2YTF9|A2YTF9_ORYSI	868.5	1745	2.01	121.46	14805	Uncharacterized protein OS=Oryza sativa subsp. indica OX=39946 GN=OsI_28599 PE=4 SV=1
16655	tr|J7F210|J7F210_ORYSI	9137	18440	2.02	157.78	26993	30S ribosomal protein S2 chloroplastic OS=Oryza sativa subsp. indica OX=39946 GN=rps2 PE=3 SV=1
16657	P0C481|RR2_ORYSI	9137	18440	2.02	157.78	26993	30S ribosomal protein S2 chloroplastic OS=Oryza sativa subsp. indica OX=39946 GN=rps2 PE=3 SV=1
25138	P0C456|RK33_ORYSI	6146	12410	2.02	116.37	7643	50S ribosomal protein L33 chloroplastic OS=Oryza sativa subsp. indica OX=39946 GN=rpl33 PE=3 SV=1
25141	tr|J3RG79|J3RG79_ORYSI	6146	12410	2.02	116.37	7643	50S ribosomal protein L33 chloroplastic OS=Oryza sativa subsp. indica OX=39946 GN=rpl33 PE=3 SV=1
27650	tr|A0A173CU57|A0A173CU57_ORYSI	443	893.269	2.02	79.1	6904	50S ribosomal protein L32 chloroplastic OS=Oryza sativa subsp. indica OX=39946 GN=rpl32 PE=3 SV=1
27651	P0C453|RK32_ORYSI	443	893.269	2.02	79.1	6904	50S ribosomal protein L32 chloroplastic OS=Oryza sativa subsp. indica OX=39946 GN=rpl32 PE=3 SV=1
27662	tr|J3RQ64|J3RQ64_ORYSI	443	893.269	2.02	79.1	7444	50S ribosomal protein L32 chloroplastic OS=Oryza sativa subsp. indica OX=39946 GN=rpl32 PE=3 SV=1
25963	tr|B8ACK0|B8ACK0_ORYSI	750	1516	2.02	72.56	57115	Uncharacterized protein OS=Oryza sativa subsp. indica OX=39946 GN=OsI_01403 PE=4 SV=1
18744	tr|B8AZS4|B8AZS4_ORYSI	883	1791	2.03	104.64	73086	Uncharacterized protein OS=Oryza sativa subsp. indica OX=39946 GN=OsI_20556 PE=3 SV=1
23086	tr|B8BM15|B8BM15_ORYSI	2123	4315	2.03	82.58	42234	Peptidylprolyl isomerase OS=Oryza sativa subsp. indica OX=39946 GN=OsI_37454 PE=4 SV=1
23728	tr|B8BIF6|B8BIF6_ORYSI	2123	4315	2.03	82.58	42382	Peptidylprolyl isomerase OS=Oryza sativa subsp. indica OX=39946 GN=OsI_35103 PE=4 SV=1
25784	tr|A2Z903|A2Z903_ORYSI	491	997.565	2.03	71.59	115066	Uncharacterized protein OS=Oryza sativa subsp. indica OX=39946 GN=OsI_34194 PE=4 SV=1
24572	tr|A2Y9F4|A2Y9F4_ORYSI	2946	6026	2.05	74.39	50482	Uncharacterized protein OS=Oryza sativa subsp. indica OX=39946 GN=OsI_21696 PE=4 SV=1
26802	tr|A2XSN9|A2XSN9_ORYSI	485.5	994.185	2.05	56.11	76116	Exocyst subunit Exo70 family protein OS=Oryza sativa subsp. indica OX=39946 GN=OsI_15625 PE=3 SV=1
13209	tr|B8AHN8|B8AHN8_ORYSI	433.5	893.752	2.06	185.4	126851	Uncharacterized protein OS=Oryza sativa subsp. indica OX=39946 GN=OsI_08745 PE=4 SV=1
23494	tr|A2YCL4|A2YCL4_ORYSI	2448	5068	2.07	95.8	16339	Uncharacterized protein OS=Oryza sativa subsp. indica OX=39946 GN=OsI_22855 PE=3 SV=1
27527	tr|B8BD31|B8BD31_ORYSI	1420	2936	2.07	84.52	24101	Uncharacterized protein OS=Oryza sativa subsp. indica OX=39946 GN=OsI_31882 PE=3 SV=1
28064	tr|Q2F980|Q2F980_ORYSI	944	1953	2.07	54.62	55369	NADH-ubiquinone oxidoreductase chain 4 OS=Oryza sativa subsp. indica OX=39946 GN=nad4 PE=3 SV=1
21120	tr|B8AU22|B8AU22_ORYSI	6537	13620	2.08	104.79	36564	Uncharacterized protein OS=Oryza sativa subsp. indica OX=39946 GN=OsI_15994 PE=3 SV=1
9763	tr|A2WUI9|A2WUI9_ORYSI	270	563.967	2.09	272.11	53795	Uncharacterized protein OS=Oryza sativa subsp. indica OX=39946 GN=OsI_03540 PE=3 SV=1
13798	tr|A2YNT9|A2YNT9_ORYSI	1226	2568	2.09	173.9	28472	40S ribosomal protein S6 OS=Oryza sativa subsp. indica OX=39946 GN=OsI_26912 PE=3 SV=1
25423	tr|A2XBF2|A2XBF2_ORYSI	656	1371	2.09	68.75	40679	Uncharacterized protein OS=Oryza sativa subsp. indica OX=39946 GN=OsI_09602 PE=3 SV=1
22539	tr|B8AW30|B8AW30_ORYSI	1096	2298	2.1	97.69	93944	Uncharacterized protein OS=Oryza sativa subsp. indica OX=39946 GN=OsI_19280 PE=4 SV=1
31571	tr|B8AR72|B8AR72_ORYSI	920	1943	2.11	41.98	19866	Uncharacterized protein OS=Oryza sativa subsp. indica OX=39946 GN=OsI_15075 PE=4 SV=1
8999	tr|A2Y2Z1|A2Y2Z1_ORYSI	334	707.856	2.12	313.47	49650	Guanosine nucleotide diphosphate dissociation inhibitor OS=Oryza sativa subsp. indica OX=39946 GN=OsI_19382 PE=3 SV=1
11117	tr|B8AIH4|B8AIH4_ORYSI	2942	6243	2.12	211.71	134273	Uncharacterized protein OS=Oryza sativa subsp. indica OX=39946 GN=OsI_06001 PE=4 SV=1
13568	tr|A2XK42|A2XK42_ORYSI	6484	13720	2.12	167.3	138409	DNA-directed RNA polymerase subunit beta OS=Oryza sativa subsp. indica OX=39946 GN=OsI_12811 PE=3 SV=1
26619	tr|B8A9E7|B8A9E7_ORYSI	781	1653	2.12	66.17	32583	Uncharacterized protein OS=Oryza sativa subsp. indica OX=39946 GN=OsI_03722 PE=4 SV=1
27801	tr|B8BL02|B8BL02_ORYSI	757.5	1614	2.13	80.15	21144	Uncharacterized protein OS=Oryza sativa subsp. indica OX=39946 GN=OsI_36451 PE=4 SV=1
24159	tr|A2XPB9|A2XPB9_ORYSI	1215	2585	2.13	78.19	39320	Uncharacterized protein OS=Oryza sativa subsp. indica OX=39946 GN=OsI_14433 PE=3 SV=1
18371	tr|B8BGJ2|B8BGJ2_ORYSI	969	2077	2.14	128.97	23812	Uncharacterized protein OS=Oryza sativa subsp. indica OX=39946 GN=OsI_33317 PE=4 SV=1
18680	tr|A2WKK2|A2WKK2_ORYSI	283.5	610.32	2.15	144.98	30122	Uncharacterized protein OS=Oryza sativa subsp. indica OX=39946 GN=OsI_00355 PE=4 SV=1
16978	tr|B8AHZ2|B8AHZ2_ORYSI	2034	4380	2.15	115.62	118381	Uncharacterized protein OS=Oryza sativa subsp. indica OX=39946 GN=OsI_07188 PE=4 SV=1
19730	tr|A2XWJ3|A2XWJ3_ORYSI	3041	6568	2.16	131.35	19866	Uncharacterized protein OS=Oryza sativa subsp. indica OX=39946 GN=OsI_17022 PE=4 SV=1
24636	tr|B8BL86|B8BL86_ORYSI	1411	3042	2.16	118.7	26928	Uncharacterized protein OS=Oryza sativa subsp. indica OX=39946 GN=OsI_36598 PE=4 SV=1
26536	tr|B8B193|B8B193_ORYSI	1411	3042	2.16	118.7	21379	Uncharacterized protein OS=Oryza sativa subsp. indica OX=39946 GN=OsI_21269 PE=4 SV=1
24687	tr|B8AYR2|B8AYR2_ORYSI	2542	5503	2.17	101.52	20117	Uncharacterized protein OS=Oryza sativa subsp. indica OX=39946 GN=OsI_20141 PE=3 SV=1
24723	tr|A6MZN1|A6MZN1_ORYSI	2542	5503	2.17	101.52	9283	60S acidic ribosomal protein p2b (Fragment) OS=Oryza sativa subsp. indica OX=39946 PE=2 SV=1
25618	tr|A2WV48|A2WV48_ORYSI	645	1398	2.17	42.15	71580	Uncharacterized protein OS=Oryza sativa subsp. indica OX=39946 GN=OsI_03761 PE=4 SV=1
17423	tr|B8BD82|B8BD82_ORYSI	1734	3804	2.19	116.01	521935	Uncharacterized protein OS=Oryza sativa subsp. indica OX=39946 GN=OsI_30520 PE=4 SV=1
31785	tr|Q5S1T9|Q5S1T9_ORYSI	456	996.599	2.19	33.38	23034	PRA1 family protein OS=Oryza sativa subsp. indica OX=39946 GN=Pra1 PE=2 SV=1
28296	tr|B8BFF8|B8BFF8_ORYSI	610	1341	2.2	63.15	77691	Uncharacterized protein OS=Oryza sativa subsp. indica OX=39946 GN=OsI_32634 PE=4 SV=1
27025	tr|A2XP50|A2XP50_ORYSI	829.5	1826	2.2	38.53	20920	Uncharacterized protein OS=Oryza sativa subsp. indica OX=39946 GN=OsI_14354 PE=4 SV=1
24478	tr|Q6V9H6|Q6V9H6_ORYSI	652	1443	2.21	114.49	31053	Brown planthopper-induced resistance protein 1 OS=Oryza sativa subsp. indica OX=39946 GN=Bi1 PE=2 SV=1
24483	tr|A2XB21|A2XB21_ORYSI	652	1443	2.21	114.49	22928	Uncharacterized protein OS=Oryza sativa subsp. indica OX=39946 GN=OsI_09454 PE=4 SV=1
24500	tr|Q6V9H7|Q6V9H7_ORYSI	652	1443	2.21	114.49	18880	Putative brown planthopper susceptibility protein Hd002A OS=Oryza sativa subsp. indica OX=39946 PE=2 SV=1
23150	tr|A2Z4X9|A2Z4X9_ORYSI	1014	2254	2.22	114.61	35550	Uncharacterized protein OS=Oryza sativa subsp. indica OX=39946 GN=OsI_32702 PE=4 SV=1
27892	tr|A2XD99|A2XD99_ORYSI	204.5	456.292	2.23	60.72	78582	Uncharacterized protein OS=Oryza sativa subsp. indica OX=39946 GN=OsI_10282 PE=4 SV=1
29621	tr|B8BGL9|B8BGL9_ORYSI	204.5	456.292	2.23	60.72	78774	Uncharacterized protein OS=Oryza sativa subsp. indica OX=39946 GN=OsI_33412 PE=4 SV=1
11373	tr|A2ZIF8|A2ZIF8_ORYSI	501	1120	2.24	244.04	80727	Uncharacterized protein OS=Oryza sativa subsp. indica OX=39946 GN=OsI_37606 PE=3 SV=1
11036	tr|A2X8N2|A2X8N2_ORYSI	895	2001	2.24	212.51	33475	Uncharacterized protein OS=Oryza sativa subsp. indica OX=39946 GN=OsI_08595 PE=3 SV=1
18103	tr|H6ST15|H6ST15_ORYSI	1192	2666	2.24	120.2	99392	Trehalose-6-phosphate synthase 3 OS=Oryza sativa subsp. indica OX=39946 GN=TPS3 PE=2 SV=1
15369	tr|B8A9V6|B8A9V6_ORYSI	2614	5881	2.25	164.86	54600	Uncharacterized protein OS=Oryza sativa subsp. indica OX=39946 GN=OsI_05355 PE=3 SV=1
28959	tr|A2X5E8|A2X5E8_ORYSI	268.5	604.043	2.25	37.47	39240	Uncharacterized protein OS=Oryza sativa subsp. indica OX=39946 GN=OsI_07426 PE=4 SV=1
31413	tr|A2Z142|A2Z142_ORYSI	324.5	739.241	2.28	55.96	41771	Uncharacterized protein OS=Oryza sativa subsp. indica OX=39946 GN=OsI_31314 PE=4 SV=1
29380	tr|A2YQ88|A2YQ88_ORYSI	296	678.402	2.29	62.09	61074	Uncharacterized protein OS=Oryza sativa subsp. indica OX=39946 GN=OsI_27451 PE=4 SV=1
20065	tr|B8AVX9|B8AVX9_ORYSI	2365	5440	2.3	116.93	69614	Uncharacterized protein OS=Oryza sativa subsp. indica OX=39946 GN=OsI_17781 PE=4 SV=1
24351	tr|A2XJM7|A2XJM7_ORYSI	637.5	1464	2.3	82.88	67916	Uncharacterized protein OS=Oryza sativa subsp. indica OX=39946 GN=OsI_12642 PE=3 SV=1
26106	tr|B8BCJ0|B8BCJ0_ORYSI	420.5	968.111	2.3	76.2	48987	Uncharacterized protein OS=Oryza sativa subsp. indica OX=39946 GN=OsI_31602 PE=3 SV=1
8406	tr|B8BN80|B8BN80_ORYSI	481.5	1118	2.32	370.89	60860	Uncharacterized protein OS=Oryza sativa subsp. indica OX=39946 GN=OsI_39285 PE=3 SV=1
18560	tr|A2YZ23|A2YZ23_ORYSI	8272	19250	2.33	155.8	19495	Uncharacterized protein OS=Oryza sativa subsp. indica OX=39946 GN=OsI_30588 PE=3 SV=1
31406	B8B6G5|POED2_ORYSI	269.5	629.151	2.33	53.9	39903	Polyprenol reductase 2 OS=Oryza sativa subsp. indica OX=39946 GN=OsI_26070 PE=3 SV=2
31408	A2XWN6|POED1_ORYSI	269.5	629.151	2.33	53.9	39867	Polyprenol reductase 1 OS=Oryza sativa subsp. indica OX=39946 GN=OsI_17065 PE=3 SV=1
14430	tr|A2YZX2|A2YZX2_ORYSI	620.5	1458	2.35	156.77	41944	Uncharacterized protein OS=Oryza sativa subsp. indica OX=39946 GN=OsI_30907 PE=3 SV=1
22320	tr|A2XRR5|A2XRR5_ORYSI	7796	18300	2.35	143.64	19462	Uncharacterized protein OS=Oryza sativa subsp. indica OX=39946 GN=OsI_15320 PE=4 SV=1
22321	tr|A2XRR4|A2XRR4_ORYSI	7796	18300	2.35	143.64	19604	Uncharacterized protein OS=Oryza sativa subsp. indica OX=39946 GN=OsI_15319 PE=4 SV=1
8973	tr|B8AYI6|B8AYI6_ORYSI	234.5	552.861	2.36	291.75	63864	Uncharacterized protein OS=Oryza sativa subsp. indica OX=39946 GN=OsI_20058 PE=4 SV=1
12299	tr|A2YNY5|A2YNY5_ORYSI	9026	21550	2.39	180.33	72953	Uncharacterized protein OS=Oryza sativa subsp. indica OX=39946 GN=OsI_26968 PE=4 SV=1
16724	tr|A2XYX1|A2XYX1_ORYSI	380.5	910.169	2.39	124.72	52556	Uncharacterized protein OS=Oryza sativa subsp. indica OX=39946 GN=OsI_17904 PE=4 SV=1
21638	tr|A2XDJ5|A2XDJ5_ORYSI	1728	4138	2.39	110.71	55620	Uncharacterized protein OS=Oryza sativa subsp. indica OX=39946 GN=OsI_10384 PE=3 SV=1
20721	tr|A2X026|A2X026_ORYSI	165.5	396.418	2.4	119.09	55446	Carboxypeptidase OS=Oryza sativa subsp. indica OX=39946 GN=OsI_05564 PE=3 SV=1
26584	tr|A2YJN8|A2YJN8_ORYSI	486.5	1177	2.42	64.47	39983	Zinc transporter OS=Oryza sativa subsp. indica OX=39946 GN=OsZIP8 PE=3 SV=1
27644	tr|E3WCP2|E3WCP2_ORYSI	486.5	1177	2.42	64.47	40011	Zinc transporter OS=Oryza sativa subsp. indica OX=39946 GN=OsZIP8 PE=3 SV=1
8482	tr|A2WJR2|A2WJR2_ORYSI	6490	15790	2.43	316.68	51487	Uncharacterized protein OS=Oryza sativa subsp. indica OX=39946 GN=OsI_00059 PE=3 SV=1
16295	tr|B8AF39|B8AF39_ORYSI	3383	8224	2.43	164.15	86999	Uncharacterized protein OS=Oryza sativa subsp. indica OX=39946 GN=OsI_08008 PE=4 SV=1
30535	tr|B8BEN1|B8BEN1_ORYSI	102.5	249.633	2.44	63.48	23711	Uncharacterized protein OS=Oryza sativa subsp. indica OX=39946 GN=OsI_32446 PE=4 SV=1
18683	tr|A2XIU7|A2XIU7_ORYSI	1189	2907	2.45	159.91	24059	Ribosomal protein L19 OS=Oryza sativa subsp. indica OX=39946 GN=OsI_12360 PE=3 SV=1
23789	tr|A2XWA1|A2XWA1_ORYSI	108.5	266.049	2.45	93.37	13886	Uncharacterized protein OS=Oryza sativa subsp. indica OX=39946 GN=OsI_16928 PE=4 SV=1
24844	tr|B8B2N3|B8B2N3_ORYSI	1376	3389	2.46	63.56	30360	Uncharacterized protein OS=Oryza sativa subsp. indica OX=39946 GN=OsI_21637 PE=4 SV=1
24984	tr|B8B2U4|B8B2U4_ORYSI	432.5	1078	2.49	56.8	65368	Uncharacterized protein OS=Oryza sativa subsp. indica OX=39946 GN=OsI_23089 PE=4 SV=1
25034	tr|A2X175|A2X175_ORYSI	319.5	799.114	2.5	79.55	9212	Uncharacterized protein OS=Oryza sativa subsp. indica OX=39946 GN=OsI_05956 PE=4 SV=1
22180	tr|B8B0J8|B8B0J8_ORYSI	594.5	1491	2.51	88.77	105504	Uncharacterized protein OS=Oryza sativa subsp. indica OX=39946 GN=OsI_22505 PE=4 SV=1
26986	tr|A2WRD1|A2WRD1_ORYSI	384.5	965.214	2.51	50.47	32066	Uncharacterized protein OS=Oryza sativa subsp. indica OX=39946 GN=OsI_02417 PE=4 SV=1
9542	tr|B8BE16|B8BE16_ORYSI	3260	8250	2.53	260.58	55004	Glucose-1-phosphate adenylyltransferase OS=Oryza sativa subsp. indica OX=39946 GN=AGPsma PE=3 SV=1
23447	tr|B8BDI2|B8BDI2_ORYSI	132.5	335.58	2.53	96.51	46383	Uncharacterized protein OS=Oryza sativa subsp. indica OX=39946 GN=OsI_32021 PE=3 SV=1
16134	tr|B8ATN3|B8ATN3_ORYSI	1952	5001	2.56	150.92	40423	Uncharacterized protein OS=Oryza sativa subsp. indica OX=39946 GN=OsI_15805 PE=4 SV=1
18629	tr|A2XGG9|A2XGG9_ORYSI	3855	9947	2.58	180.23	24142	Ribosomal protein L19 OS=Oryza sativa subsp. indica OX=39946 GN=OsI_11477 PE=3 SV=1
29209	tr|A2XX68|A2XX68_ORYSI	142.5	372.276	2.61	43.99	45669	Uncharacterized protein OS=Oryza sativa subsp. indica OX=39946 GN=OsI_17270 PE=4 SV=1
33223	tr|B8AWJ0|B8AWJ0_ORYSI	742.5	1938	2.61	24.16	23485	Uncharacterized protein OS=Oryza sativa subsp. indica OX=39946 GN=OsI_18082 PE=3 SV=1
2696	tr|B8B357|B8B357_ORYSI	438.5	1194	2.72	72.88	243563	Uncharacterized protein OS=Oryza sativa subsp. indica OX=39946 GN=OsI_23125 PE=4 SV=1
19735	tr|B8B2B3|B8B2B3_ORYSI	265.5	732.481	2.76	101.3	38015	Leucine carboxyl methyltransferase 1 homolog OS=Oryza sativa subsp. indica OX=39946 GN=OsI_21566 PE=3 SV=1
9024	tr|B8BJ19|B8BJ19_ORYSI	149.5	416.698	2.79	263.84	65414	Uncharacterized protein OS=Oryza sativa subsp. indica OX=39946 GN=OsI_35067 PE=3 SV=1
15315	tr|B8BB65|B8BB65_ORYSI	418.5	1187	2.84	190.25	31228	Uncharacterized protein OS=Oryza sativa subsp. indica OX=39946 GN=OsI_27993 PE=4 SV=1
21735	tr|B8A8G2|B8A8G2_ORYSI	2372	6731	2.84	129.42	56208	Uncharacterized protein OS=Oryza sativa subsp. indica OX=39946 GN=OsI_04995 PE=4 SV=1
20822	tr|Q0Z7Z4|Q0Z7Z4_ORYSI	1256	3596	2.86	119.1	40026	Mitogen-activated protein kinase kinase 6 OS=Oryza sativa subsp. indica OX=39946 GN=OsI_02144 PE=2 SV=1
16437	A2ZAB5|SAPK3_ORYSI	559.5	1605	2.87	160.54	37871	Serine/threonine-protein kinase SAPK3 OS=Oryza sativa subsp. indica OX=39946 GN=SAPK3 PE=1 SV=2
14652	tr|A6N0K0|A6N0K0_ORYSI	224.5	648.465	2.89	220.86	15877	Glyceraldehyde-3-phosphate dehydrogenase (Fragment) OS=Oryza sativa subsp. indica OX=39946 PE=2 SV=1
29012	tr|B8AL07|B8AL07_ORYSI	213	621.909	2.92	56.42	49288	Phosphatidylserine decarboxylase proenzyme 1 mitochondrial OS=Oryza sativa subsp. indica OX=39946 GN=OsI_09619 PE=3 SV=1
25373	tr|A0A1C9C4T1|A0A1C9C4T1_ORYSI	226.5	661.019	2.92	54.89	100302	Chloroplast SAP domain-containing protein OS=Oryza sativa subsp. indica OX=39946 GN=WSL3 PE=2 SV=1
15028	tr|A2Y0P2|A2Y0P2_ORYSI	474	1423	3	164.06	60246	Uncharacterized protein OS=Oryza sativa subsp. indica OX=39946 GN=OsI_18566 PE=4 SV=1
8469	tr|B8B2A2|B8B2A2_ORYSI	27430	83160	3.03	331.31	47938	Uncharacterized protein OS=Oryza sativa subsp. indica OX=39946 GN=OsI_21538 PE=3 SV=1
13887	tr|A2XW27|A2XW27_ORYSI	446.5	1356	3.04	154.45	58038	Uncharacterized protein OS=Oryza sativa subsp. indica OX=39946 GN=OsI_16851 PE=4 SV=1
21567	tr|B8BMI2|B8BMI2_ORYSI	249.5	764.349	3.06	89.17	43378	Glycosyltransferase OS=Oryza sativa subsp. indica OX=39946 GN=OsI_38729 PE=3 SV=1
18469	tr|A2Z3I8|A2Z3I8_ORYSI	3734	11510	3.08	129.08	28409	Uncharacterized protein OS=Oryza sativa subsp. indica OX=39946 GN=OsI_32193 PE=3 SV=1
24551	tr|B8AIE7|B8AIE7_ORYSI	293	903.892	3.08	60.93	175074	Uncharacterized protein OS=Oryza sativa subsp. indica OX=39946 GN=OsI_08895 PE=4 SV=1
26608	tr|B8ACT9|B8ACT9_ORYSI	428.5	1330	3.1	90.37	36537	Uncharacterized protein OS=Oryza sativa subsp. indica OX=39946 GN=OsI_00069 PE=4 SV=1
18616	tr|A2ZBX3|A2ZBX3_ORYSI	111.5	361.653	3.24	138.96	56673	Uncharacterized protein OS=Oryza sativa subsp. indica OX=39946 GN=OsI_35279 PE=4 SV=1
30715	tr|A2XZ05|A2XZ05_ORYSI	100.5	331.717	3.3	59.91	32536	Clathrin light chain OS=Oryza sativa subsp. indica OX=39946 GN=OsI_17938 PE=3 SV=1
21394	tr|B8AVB8|B8AVB8_ORYSI	106.5	352.962	3.31	82.46	158141	Uncharacterized protein OS=Oryza sativa subsp. indica OX=39946 GN=OsI_14889 PE=4 SV=1
25289	tr|B8B2E6|B8B2E6_ORYSI	130	432.632	3.33	77.55	17608	Uncharacterized protein OS=Oryza sativa subsp. indica OX=39946 GN=OsI_23010 PE=3 SV=1
29576	A2XM23|PHYC_ORYSI	230	773.523	3.36	35.38	126043	Phytochrome C OS=Oryza sativa subsp. indica OX=39946 GN=PHYC PE=3 SV=2
11163	tr|A2WJU9|A2WJU9_ORYSI	3382	11400	3.37	238.74	30476	Peptidyl-prolyl cis-trans isomerase OS=Oryza sativa subsp. indica OX=39946 GN=OsI_00098 PE=3 SV=1
20193	tr|B8B3S4|B8B3S4_ORYSI	187.5	631.083	3.37	85.15	154684	Uncharacterized protein OS=Oryza sativa subsp. indica OX=39946 GN=OsI_23387 PE=4 SV=1
19608	tr|B8ACT8|B8ACT8_ORYSI	1285	4360	3.39	118.32	32467	Uncharacterized protein OS=Oryza sativa subsp. indica OX=39946 GN=OsI_00068 PE=4 SV=1
1078	tr|B8BDE1|B8BDE1_ORYSI	936.5	3224	3.44	125.23	395151	Uncharacterized protein OS=Oryza sativa subsp. indica OX=39946 GN=OsI_30556 PE=4 SV=1
13937	tr|A6N150|A6N150_ORYSI	23220	80330	3.46	232.15	27921	Ribonuclease 3 OS=Oryza sativa subsp. indica OX=39946 PE=2 SV=1
13982	tr|A2Z3I6|A2Z3I6_ORYSI	23220	80330	3.46	232.15	28368	Uncharacterized protein OS=Oryza sativa subsp. indica OX=39946 GN=OsI_32190 PE=3 SV=1
23473	tr|A2YNY6|A2YNY6_ORYSI	273	946.383	3.47	94.84	70322	Uncharacterized protein OS=Oryza sativa subsp. indica OX=39946 GN=OsI_26969 PE=4 SV=1
27108	tr|A2X8W8|A2X8W8_ORYSI	317.5	1112	3.5	56.8	130989	Uncharacterized protein OS=Oryza sativa subsp. indica OX=39946 GN=OsI_08680 PE=4 SV=1
28189	tr|B8BDJ5|B8BDJ5_ORYSI	129.5	466.914	3.61	31.03	67123	Uncharacterized protein OS=Oryza sativa subsp. indica OX=39946 GN=OsI_32049 PE=4 SV=1
25917	tr|B8ATM5|B8ATM5_ORYSI	270	981.148	3.63	62.12	63188	Uncharacterized protein OS=Oryza sativa subsp. indica OX=39946 GN=OsI_17251 PE=4 SV=1
15722	tr|A0A165TZX1|A0A165TZX1_ORYSI	368.5	1355	3.68	187.73	16260	Alba1 OS=Oryza sativa subsp. indica OX=39946 GN=Alba1 PE=2 SV=1
14017	tr|B8B6A7|B8B6A7_ORYSI	193.5	729.584	3.77	211.53	117898	Uncharacterized protein OS=Oryza sativa subsp. indica OX=39946 GN=OsI_27435 PE=3 SV=1
27936	A4KAG7|KSL5_ORYSI	295.5	1137	3.85	46.79	92514	Ent-isokaur-15-ene synthase OS=Oryza sativa subsp. indica OX=39946 GN=KSL5 PE=1 SV=1
28462	tr|B8AEA2|B8AEA2_ORYSI	295.5	1137	3.85	46.79	74226	Uncharacterized protein OS=Oryza sativa subsp. indica OX=39946 GN=OsI_07746 PE=3 SV=1
11920	tr|B8AU60|B8AU60_ORYSI	325	1259	3.87	224.47	252520	Uncharacterized protein OS=Oryza sativa subsp. indica OX=39946 GN=OsI_17386 PE=4 SV=1
9256	B8BM17|KPYC2_ORYSI	394	1605	4.07	268.58	57442	Pyruvate kinase 2 cytosolic OS=Oryza sativa subsp. indica OX=39946 GN=OsI_37456 PE=3 SV=1
28660	tr|A2YGT5|A2YGT5_ORYSI	89.5	364.55	4.07	61.14	61697	Uncharacterized protein OS=Oryza sativa subsp. indica OX=39946 GN=OsI_24397 PE=4 SV=1
8771	tr|A2Y0Q8|A2Y0Q8_ORYSI	141.5	583.764	4.13	304.31	84792	Uncharacterized protein OS=Oryza sativa subsp. indica OX=39946 GN=OsI_18583 PE=4 SV=1
20753	tr|B8B9G1|B8B9G1_ORYSI	89.5	384.83	4.3	111.06	92190	Uncharacterized protein OS=Oryza sativa subsp. indica OX=39946 GN=OsI_30116 PE=4 SV=1
11244	tr|A2Z0D1|A2Z0D1_ORYSI	1003	4333	4.32	224.92	29174	Uncharacterized protein OS=Oryza sativa subsp. indica OX=39946 GN=OsI_31052 PE=4 SV=1
15195	tr|A2ZLU3|A2ZLU3_ORYSI	3763	17010	4.52	280.05	23842	Uncharacterized protein OS=Oryza sativa subsp. indica OX=39946 GN=OsI_38787 PE=4 SV=1
492	tr|A2ZLE4|A2ZLE4_ORYSI	2654	11990	4.52	257.86	23213	Nucleoside diphosphate kinase OS=Oryza sativa subsp. indica OX=39946 GN=OsI_38642 PE=3 SV=1
257	tr|B8B5I7|B8B5I7_ORYSI	22000	101500	4.61	494.17	175056	Uncharacterized protein OS=Oryza sativa subsp. indica OX=39946 GN=OsI_27183 PE=4 SV=1
258	tr|A0A1D9CEX0|A0A1D9CEX0_ORYSI	22000	101500	4.61	494.17	175040	Chloroplast ferredoxin-dependent glutamate synthase OS=Oryza sativa subsp. indica OX=39946 PE=2 SV=1
22754	tr|A2YWY6|A2YWY6_ORYSI	53.5	268.946	5.03	113.04	62343	Uncharacterized protein OS=Oryza sativa subsp. indica OX=39946 GN=OsI_29848 PE=4 SV=1
33353	A2WYF4|STAD2_ORYSI	88.5	451.463	5.1	23.07	44875	Stearoyl-[acyl-carrier-protein] 9-desaturase 2 chloroplastic OS=Oryza sativa subsp. indica OX=39946 GN=SSI2 PE=3 SV=1
18860	tr|A2YLZ3|A2YLZ3_ORYSI	800	4266	5.33	159.65	18626	TOND1 OS=Oryza sativa subsp. indica OX=39946 GN=OsI_26248 PE=4 SV=1
28390	tr|B8AC47|B8AC47_ORYSI	153	843.053	5.51	65.29	47696	Uncharacterized protein OS=Oryza sativa subsp. indica OX=39946 GN=OsI_04433 PE=4 SV=1
24868	tr|B8AD88|B8AD88_ORYSI	251	1462	5.82	75.44	59447	Uncharacterized protein OS=Oryza sativa subsp. indica OX=39946 GN=OsI_00379 PE=4 SV=1
29815	tr|A2X785|A2X785_ORYSI	514	3007	5.85	43.68	31885	Uncharacterized protein OS=Oryza sativa subsp. indica OX=39946 GN=OsI_08077 PE=4 SV=1
27098	tr|B8BCM4|B8BCM4_ORYSI	131.5	893.752	6.8	51.42	39469	Uncharacterized protein OS=Oryza sativa subsp. indica OX=39946 GN=OsI_31680 PE=4 SV=1
28911	tr|B8AN74|B8AN74_ORYSI	882	6025	6.83	66.45	25941	Uncharacterized protein OS=Oryza sativa subsp. indica OX=39946 GN=OsI_14271 PE=4 SV=1
22627	tr|B8AVI0|B8AVI0_ORYSI	56.5	418.629	7.41	73.92	69506	Uncharacterized protein OS=Oryza sativa subsp. indica OX=39946 GN=OsI_16344 PE=4 SV=1
27062	tr|A2ZLB6|A2ZLB6_ORYSI	58.5	482.365	8.25	64.48	46274	Uncharacterized protein OS=Oryza sativa subsp. indica OX=39946 GN=OsI_38615 PE=3 SV=1
16507	tr|A2YE33|A2YE33_ORYSI	50.5	427.321	8.46	165.37	20822	Uncharacterized protein OS=Oryza sativa subsp. indica OX=39946 GN=OsI_23378 PE=4 SV=1
31248	tr|A0A385KPU4|A0A385KPU4_ORYSI	61.5	529.685	8.61	22.42	35313	Cell wall integrity protein OS=Oryza sativa subsp. indica OX=39946 GN=PRP PE=4 SV=1
12043	tr|B8AF48|B8AF48_ORYSI	252.5	2348	9.3	211.33	28145	Uncharacterized protein OS=Oryza sativa subsp. indica OX=39946 GN=OsI_09495 PE=4 SV=1
24078	tr|A2YPV1|A2YPV1_ORYSI	56.5	626.254	11.08	112.48	48238	Uncharacterized protein OS=Oryza sativa subsp. indica OX=39946 GN=OsI_27304 PE=4 SV=1
57	tr|Q84JG8|Q84JG8_ORYSI	185	2192	11.85	369.02	42245	Chloroplast sedoheptulose-1 7-bisphosphatase OS=Oryza sativa subsp. indica OX=39946 GN=OsI_14458 PE=2 SV=1
23452	tr|A2XA82|A2XA82_ORYSI	33.5	408.007	12.18	75.37	24412	UMP-CMP kinase OS=Oryza sativa subsp. indica OX=39946 GN=OsI_09157 PE=3 SV=1
15960	tr|Q84V23|Q84V23_ORYSI	19.5	380.002	19.49	130.95	103467	Lon protease homolog mitochondrial OS=Oryza sativa subsp. indica OX=39946 PE=2 SV=1
15968	tr|A2XFT8|A2XFT8_ORYSI	19.5	380.002	19.49	130.95	107186	Lon protease homolog mitochondrial OS=Oryza sativa subsp. indica OX=39946 GN=OsI_11235 PE=3 SV=1
13974	tr|A2YZX3|A2YZX3_ORYSI	73.5	1649	22.44	222.17	39451	Uncharacterized protein OS=Oryza sativa subsp. indica OX=39946 GN=OsI_30908 PE=4 SV=1
26902	tr|A2YQK1|A2YQK1_ORYSI	78.5	1788	22.77	66.2	49826	Uncharacterized protein OS=Oryza sativa subsp. indica OX=39946 GN=OsI_27565 PE=4 SV=1
23433	tr|B8A7L3|B8A7L3_ORYSI	10.5	272.809	25.98	100.89	68124	Uncharacterized protein OS=Oryza sativa subsp. indica OX=39946 GN=OsI_03279 PE=4 SV=1
3587	tr|Q6R2Q1|Q6R2Q1_ORYSI	39.5	1145	29	68.47	142065	NBS-LRR-like protein B OS=Oryza sativa subsp. indica OX=39946 GN=NL-B PE=3 SV=1
17078	tr|A2WJR6|A2WJR6_ORYSI	35.5	2580	72.67	158.2	33423	Uncharacterized protein OS=Oryza sativa subsp. indica OX=39946 GN=OsI_00064 PE=4 SV=1
9897	tr|D0TZC9|D0TZC9_ORYSI	1.5	306.609	204.41	258.47	54845	Glucose-1-phosphate adenylyltransferase OS=Oryza sativa subsp. indica OX=39946 GN=AGPsma PE=3 SV=1
14633	tr|A2X3J5|A2X3J5_ORYSI	0	400.281	256	203.49	29760	40S ribosomal protein S3a OS=Oryza sativa subsp. indica OX=39946 GN=OsI_06784 PE=3 SV=1
14006	tr|B8ADD3|B8ADD3_ORYSI	0	425.389	256	186.64	52962	Carboxypeptidase OS=Oryza sativa subsp. indica OX=39946 GN=OsI_00486 PE=3 SV=1
17565	P0C8Z0|Y8359_ORYSI	0	1044	256	164.44	22579	Uncharacterized protein OsI_027940 OS=Oryza sativa subsp. indica OX=39946 GN=OsI_027940 PE=1 SV=2
21224	tr|B8BEU7|B8BEU7_ORYSI	0	368.413	256	133.3	17555	Uncharacterized protein OS=Oryza sativa subsp. indica OX=39946 GN=OsI_32489 PE=4 SV=1
25235	tr|B8BLU6|B8BLU6_ORYSI	0	750.829	256	86.36	29147	Uncharacterized protein OS=Oryza sativa subsp. indica OX=39946 GN=OsI_37340 PE=3 SV=1
26050	tr|A2XBM1|A2XBM1_ORYSI	0	415.732	256	86.3	66821	Nascent polypeptide-associated complex subunit beta OS=Oryza sativa subsp. indica OX=39946 GN=OsI_09683 PE=3 SV=1
26766	tr|B8BHJ4|B8BHJ4_ORYSI	0	415.732	256	86.3	21503	Nascent polypeptide-associated complex subunit beta OS=Oryza sativa subsp. indica OX=39946 GN=OsI_34071 PE=3 SV=1
