# Supplementary material for: Integration of Transcriptomic And Proteomic Analyses Reveals Several Levels of Metabolic Regulation In The Excess Starch And Early Senescent Leaf Mutant lses1 In Rice
Source: Research Square preprint supplement (doi:10.21203/rs.3.rs-805903/v1), 2021-09-14
Supplement: Supplementary file 9 [file a6e50078f070761a35430fa7.xlsx]

## Sheet: Cluster 1
UniprotKB AC/ID	interaction	UniprotKB AC/ID
B8ACZ5	interacts with	A2WXS7
B8ACZ5	interacts with	A2X009
B8ACZ5	interacts with	B8BAF5
B8ACZ5	interacts with	B8AZD7
B8ACZ5	interacts with	A2XZF9
B8ACZ5	interacts with	A2XGG9
B8ACZ5	interacts with	A2X6N1
B8ACZ5	interacts with	B8AHZ6
B8ACZ5	interacts with	A2WZV1
B8ACZ5	interacts with	A2YNT9
B8ACZ5	interacts with	A2XJ89
B8ACZ5	interacts with	B8AE20
B8ACZ5	interacts with	A2Y7H9
B8ACZ5	interacts with	A2XDL4
B8ACZ5	interacts with	A2X3J5
B8ACZ5	interacts with	A2X3I0
B8ACZ5	interacts with	A2ZAB3
B8ACZ5	interacts with	A2YJM2
A2XZF9	interacts with	A2X009
A2XZF9	interacts with	B8BAF5
A2XZF9	interacts with	B8AZD7
A2XZF9	interacts with	A2XGG9
A2XZF9	interacts with	A2X6N1
A2XZF9	interacts with	B8ACZ5
A2XZF9	interacts with	B8AHZ6
A2XZF9	interacts with	A2WZV1
A2XZF9	interacts with	A2YNT9
A2XZF9	interacts with	A2XJ89
A2XZF9	interacts with	B8AE20
A2XZF9	interacts with	A2Y7H9
A2XZF9	interacts with	A2XDL4
A2XZF9	interacts with	A2X3J5
A2XZF9	interacts with	A2X3I0
A2XZF9	interacts with	A2ZAB3
A2XZF9	interacts with	A2YJM2
B8AZD7	interacts with	A2WXS7
B8AZD7	interacts with	A2X009
B8AZD7	interacts with	B8BAF5
B8AZD7	interacts with	A2YNT9
B8AZD7	interacts with	A2XJ89
B8AZD7	interacts with	B8AE20
B8AZD7	interacts with	A2XZF9
B8AZD7	interacts with	A2XGG9
B8AZD7	interacts with	A2Y7H9
B8AZD7	interacts with	A2XDL4
B8AZD7	interacts with	A2X6N1
B8AZD7	interacts with	B8ACZ5
B8AZD7	interacts with	A2X3J5
B8AZD7	interacts with	A2X3I0
B8AZD7	interacts with	A2ZAB3
B8AZD7	interacts with	B8AHZ6
B8AZD7	interacts with	A2WZV1
B8AZD7	interacts with	A2YJM2
A2Y7H9	interacts with	A2WXS7
A2Y7H9	interacts with	A2X009
A2Y7H9	interacts with	B8BAF5
A2Y7H9	interacts with	A2YNT9
A2Y7H9	interacts with	B8AZD7
A2Y7H9	interacts with	A2XJ89
A2Y7H9	interacts with	B8AE20
A2Y7H9	interacts with	A2XZF9
A2Y7H9	interacts with	A2XGG9
A2Y7H9	interacts with	A2XDL4
A2Y7H9	interacts with	A2X6N1
A2Y7H9	interacts with	B8ACZ5
A2Y7H9	interacts with	A2X3J5
A2Y7H9	interacts with	A2X3I0
A2Y7H9	interacts with	A2ZAB3
A2Y7H9	interacts with	B8AHZ6
A2Y7H9	interacts with	A2WZV1
A2Y7H9	interacts with	A2YJM2
A2WXS7	interacts with	A2XGG9
A2WXS7	interacts with	A2Y7H9
A2WXS7	interacts with	A2XDL4
A2WXS7	interacts with	A2X009
A2WXS7	interacts with	B8BAF5
A2WXS7	interacts with	A2X6N1
A2WXS7	interacts with	A2YNT9
A2WXS7	interacts with	B8ACZ5
A2WXS7	interacts with	B8AZD7
A2WXS7	interacts with	A2X3J5
A2WXS7	interacts with	A2X3I0
A2WXS7	interacts with	A2XJ89
A2WXS7	interacts with	A2ZAB3
A2WXS7	interacts with	B8AHZ6
A2WXS7	interacts with	B8AE20
A2WXS7	interacts with	A2WZV1
A2WXS7	interacts with	A2YJM2
A2WZV1	interacts with	A2WXS7
A2WZV1	interacts with	A2X009
A2WZV1	interacts with	B8BAF5
A2WZV1	interacts with	A2YNT9
A2WZV1	interacts with	B8AZD7
A2WZV1	interacts with	A2XJ89
A2WZV1	interacts with	B8AE20
A2WZV1	interacts with	A2XZF9
A2WZV1	interacts with	A2XGG9
A2WZV1	interacts with	A2Y7H9
A2WZV1	interacts with	A2XDL4
A2WZV1	interacts with	A2X6N1
A2WZV1	interacts with	B8ACZ5
A2WZV1	interacts with	A2X3J5
A2WZV1	interacts with	A2X3I0
A2WZV1	interacts with	A2ZAB3
A2WZV1	interacts with	B8AHZ6
A2WZV1	interacts with	A2YJM2
A2X009	interacts with	A2WXS7
A2X009	interacts with	B8BAF5
A2X009	interacts with	A2YNT9
A2X009	interacts with	B8AZD7
A2X009	interacts with	A2XJ89
A2X009	interacts with	B8AE20
A2X009	interacts with	A2XZF9
A2X009	interacts with	A2XGG9
A2X009	interacts with	A2Y7H9
A2X009	interacts with	A2XDL4
A2X009	interacts with	A2X6N1
A2X009	interacts with	B8ACZ5
A2X009	interacts with	A2X3J5
A2X009	interacts with	A2X3I0
A2X009	interacts with	A2ZAB3
A2X009	interacts with	B8AHZ6
A2X009	interacts with	A2WZV1
A2X009	interacts with	A2YJM2
A2X3I0	interacts with	A2WXS7
A2X3I0	interacts with	A2X009
A2X3I0	interacts with	B8BAF5
A2X3I0	interacts with	A2YNT9
A2X3I0	interacts with	B8AZD7
A2X3I0	interacts with	A2XJ89
A2X3I0	interacts with	B8AE20
A2X3I0	interacts with	A2XZF9
A2X3I0	interacts with	A2XGG9
A2X3I0	interacts with	A2Y7H9
A2X3I0	interacts with	A2XDL4
A2X3I0	interacts with	A2X6N1
A2X3I0	interacts with	B8ACZ5
A2X3I0	interacts with	A2X3J5
A2X3I0	interacts with	A2ZAB3
A2X3I0	interacts with	B8AHZ6
A2X3I0	interacts with	A2WZV1
A2X3I0	interacts with	A2YJM2
A2X3J5	interacts with	A2WXS7
A2YJM2	interacts with	A2WXS7
A2X3J5	interacts with	A2X009
A2X3J5	interacts with	B8BAF5
A2YJM2	interacts with	A2X009
A2YJM2	interacts with	B8BAF5
A2X3J5	interacts with	A2YNT9
A2YJM2	interacts with	A2YNT9
A2X3J5	interacts with	B8AZD7
A2X3J5	interacts with	A2XJ89
A2YJM2	interacts with	B8AZD7
A2X3J5	interacts with	B8AE20
A2X3J5	interacts with	A2XZF9
A2YJM2	interacts with	A2XJ89
A2YJM2	interacts with	B8AE20
A2X3J5	interacts with	A2XGG9
A2YJM2	interacts with	A2XZF9
A2X3J5	interacts with	A2Y7H9
A2YJM2	interacts with	A2XGG9
A2X3J5	interacts with	A2XDL4
A2YJM2	interacts with	A2Y7H9
A2YJM2	interacts with	A2XDL4
A2X3J5	interacts with	A2X6N1
A2YJM2	interacts with	A2X6N1
A2X3J5	interacts with	B8ACZ5
A2YJM2	interacts with	B8ACZ5
A2YJM2	interacts with	A2X3J5
A2X3J5	interacts with	A2X3I0
A2YJM2	interacts with	A2X3I0
A2X3J5	interacts with	A2ZAB3
A2X3J5	interacts with	B8AHZ6
A2YJM2	interacts with	A2ZAB3
A2YJM2	interacts with	B8AHZ6
A2X3J5	interacts with	A2WZV1
A2X3J5	interacts with	A2YJM2
A2YJM2	interacts with	A2WZV1
B8AHZ6	interacts with	A2WXS7
B8AHZ6	interacts with	A2X009
B8AHZ6	interacts with	B8BAF5
B8AHZ6	interacts with	A2YNT9
B8AHZ6	interacts with	B8AZD7
B8AHZ6	interacts with	A2XJ89
B8AHZ6	interacts with	B8AE20
B8AHZ6	interacts with	A2XZF9
B8AHZ6	interacts with	A2XGG9
B8AHZ6	interacts with	A2Y7H9
B8AHZ6	interacts with	A2XDL4
B8AHZ6	interacts with	A2X6N1
B8AHZ6	interacts with	B8ACZ5
B8AHZ6	interacts with	A2X3J5
B8AHZ6	interacts with	A2X3I0
B8AHZ6	interacts with	A2ZAB3
B8AHZ6	interacts with	A2WZV1
B8AHZ6	interacts with	A2YJM2
A2X6N1	interacts with	A2WXS7
A2X6N1	interacts with	A2X009
A2X6N1	interacts with	B8BAF5
A2YNT9	interacts with	A2WXS7
A2X6N1	interacts with	A2YNT9
A2YNT9	interacts with	A2X009
A2X6N1	interacts with	B8AZD7
A2X6N1	interacts with	A2XJ89
A2YNT9	interacts with	B8BAF5
A2X6N1	interacts with	B8AE20
A2X6N1	interacts with	A2XZF9
A2YNT9	interacts with	B8AZD7
A2YNT9	interacts with	A2XJ89
A2X6N1	interacts with	A2XGG9
A2YNT9	interacts with	B8AE20
A2YNT9	interacts with	A2XZF9
A2X6N1	interacts with	A2Y7H9
A2X6N1	interacts with	A2XDL4
A2YNT9	interacts with	A2XGG9
A2YNT9	interacts with	A2Y7H9
A2YNT9	interacts with	A2XDL4
A2YNT9	interacts with	A2X6N1
A2X6N1	interacts with	B8ACZ5
A2X6N1	interacts with	A2X3J5
A2X6N1	interacts with	A2X3I0
A2YNT9	interacts with	B8ACZ5
A2YNT9	interacts with	A2X3J5
A2X6N1	interacts with	A2ZAB3
A2YNT9	interacts with	A2X3I0
A2X6N1	interacts with	B8AHZ6
A2X6N1	interacts with	A2WZV1
A2X6N1	interacts with	A2YJM2
A2YNT9	interacts with	A2ZAB3
A2YNT9	interacts with	B8AHZ6
A2YNT9	interacts with	A2WZV1
A2YNT9	interacts with	A2YJM2
B8AE20	interacts with	A2ZAB3
B8AE20	interacts with	B8AHZ6
B8AE20	interacts with	A2WXS7
B8AE20	interacts with	A2WZV1
B8AE20	interacts with	A2X009
B8AE20	interacts with	B8BAF5
B8AE20	interacts with	A2YJM2
B8AE20	interacts with	A2YNT9
B8AE20	interacts with	B8AZD7
B8AE20	interacts with	A2XJ89
B8AE20	interacts with	A2XZF9
B8AE20	interacts with	A2XGG9
B8AE20	interacts with	A2Y7H9
B8AE20	interacts with	A2XDL4
B8AE20	interacts with	A2X6N1
B8AE20	interacts with	B8ACZ5
B8AE20	interacts with	A2X3J5
B8AE20	interacts with	A2X3I0
B8BAF5	interacts with	A2WXS7
B8BAF5	interacts with	A2X009
B8BAF5	interacts with	A2YNT9
B8BAF5	interacts with	B8AZD7
B8BAF5	interacts with	A2XJ89
B8BAF5	interacts with	B8AE20
B8BAF5	interacts with	A2XZF9
B8BAF5	interacts with	A2XGG9
B8BAF5	interacts with	A2Y7H9
B8BAF5	interacts with	A2XDL4
B8BAF5	interacts with	A2X6N1
B8BAF5	interacts with	B8ACZ5
B8BAF5	interacts with	A2X3J5
B8BAF5	interacts with	A2X3I0
B8BAF5	interacts with	A2ZAB3
B8BAF5	interacts with	B8AHZ6
B8BAF5	interacts with	A2WZV1
B8BAF5	interacts with	A2YJM2
A2XDL4	interacts with	A2WXS7
A2XDL4	interacts with	A2X009
A2XDL4	interacts with	B8BAF5
A2XDL4	interacts with	A2YNT9
A2XDL4	interacts with	B8AZD7
A2XDL4	interacts with	A2XJ89
A2XDL4	interacts with	B8AE20
A2XDL4	interacts with	A2XZF9
A2XDL4	interacts with	A2XGG9
A2XDL4	interacts with	A2Y7H9
A2XDL4	interacts with	A2X6N1
A2XDL4	interacts with	B8ACZ5
A2XDL4	interacts with	A2X3J5
A2XDL4	interacts with	A2X3I0
A2XDL4	interacts with	A2ZAB3
A2XDL4	interacts with	B8AHZ6
A2XDL4	interacts with	A2WZV1
A2XDL4	interacts with	A2YJM2
A2XGG9	interacts with	A2WXS7
A2XGG9	interacts with	A2X009
A2XGG9	interacts with	B8BAF5
A2XGG9	interacts with	A2YNT9
A2XGG9	interacts with	B8AZD7
A2XGG9	interacts with	A2XJ89
A2XGG9	interacts with	B8AE20
A2XGG9	interacts with	A2XZF9
A2XGG9	interacts with	A2Y7H9
A2XGG9	interacts with	A2XDL4
A2XGG9	interacts with	A2X6N1
A2XGG9	interacts with	B8ACZ5
A2XGG9	interacts with	A2X3J5
A2XGG9	interacts with	A2X3I0
A2XGG9	interacts with	A2ZAB3
A2XGG9	interacts with	B8AHZ6
A2XGG9	interacts with	A2WZV1
A2XGG9	interacts with	A2YJM2
A2XJ89	interacts with	A2WXS7
A2XJ89	interacts with	A2X009
A2XJ89	interacts with	B8BAF5
A2XJ89	interacts with	A2YNT9
A2XJ89	interacts with	B8AZD7
A2XJ89	interacts with	B8AE20
A2XJ89	interacts with	A2XZF9
A2XJ89	interacts with	A2XGG9
A2XJ89	interacts with	A2Y7H9
A2XJ89	interacts with	A2XDL4
A2XJ89	interacts with	A2X6N1
A2XJ89	interacts with	B8ACZ5
A2XJ89	interacts with	A2X3J5
A2XJ89	interacts with	A2X3I0
A2XJ89	interacts with	A2ZAB3
A2XJ89	interacts with	B8AHZ6
A2XJ89	interacts with	A2WZV1
A2XJ89	interacts with	A2YJM2
A2ZAB3	interacts with	A2WXS7
A2ZAB3	interacts with	A2X009
A2ZAB3	interacts with	B8BAF5
A2ZAB3	interacts with	A2YNT9
A2ZAB3	interacts with	B8AZD7
A2ZAB3	interacts with	A2XJ89
A2ZAB3	interacts with	B8AE20
A2ZAB3	interacts with	A2XZF9
A2ZAB3	interacts with	A2XGG9
A2ZAB3	interacts with	A2Y7H9
A2ZAB3	interacts with	A2XDL4
A2ZAB3	interacts with	A2X6N1
A2ZAB3	interacts with	B8ACZ5
A2ZAB3	interacts with	A2X3J5
A2ZAB3	interacts with	A2X3I0
A2ZAB3	interacts with	B8AHZ6
A2ZAB3	interacts with	A2WZV1
A2ZAB3	interacts with	A2YJM2
B8AJD1	interacts with	A2XGG9
A2ZLS7	interacts with	A2WXS7
B8ATU3	interacts with	A2WXS7
B8AU50	interacts with	A2WXS7
A2Y7B6	interacts with	A2X009
A2WV25	interacts with	A2X009
A2Y7A6	interacts with	A2WXS7
A2WV48	interacts with	B8AZD7
A2Y7B6	interacts with	A2YNT9
A2WWQ4	interacts with	A2X009
A2YCL4	interacts with	A2X009
A2YCL4	interacts with	A2X3J5
B8B4C0	interacts with	A2XZF9
B8B1V3	interacts with	A2WXS7
B8AU50	interacts with	A2WXS7
A2X5F3	interacts with	A2X009
B8AJD1	interacts with	A2X009
A2YNM6	interacts with	A2X009
A2YPV2	interacts with	A2WXS7
A2YPV7	interacts with	A2WXS7
A2XAA0	interacts with	A2YNT9
A2YQN3	interacts with	A2WXS7
B8AE35	interacts with	A2X009
B8AME3	interacts with	A2X009
A2YSN9	interacts with	A2WXS7
A2Z2X9	interacts with	A2X009
B8ALJ1	interacts with	A2X009
A2XFL2	interacts with	A2WXS7
A2YZ23	interacts with	A2WXS7
B8APT0	interacts with	A2X009
A2XGS7	interacts with	B8BAF5
A2Z142	interacts with	A2X009
A2XM21	interacts with	A2WXS7
A2Z2X9	interacts with	A2WXS7
A2YIV1	interacts with	A2WXS7
A2WWQ4	interacts with	A2X009
B8AJD1	interacts with	B8BAF5
A2XWM3	interacts with	A2XZF9

## Sheet: Cluster 2
UniprotKB AC/ID	interaction	UniprotKB AC/ID
B8AXH3	interacts with	B8B8Z9
A2XM00	interacts with	B8BL86
B8AXH3	interacts with	A2YPU6
B8AXH3	interacts with	A2WL16
B8AXH3	interacts with	A2XM00
B8BDY2	interacts with	B8AGW7
A2XM00	interacts with	A2WRV9
B8AXH3	interacts with	Q84JG8
A2Y8K8	interacts with	A2XW27
A2YPU6	interacts with	A2WUI9
A2XM00	interacts with	B8AXH3
B8BDY2	interacts with	B8AU22
A2XM00	interacts with	B8AU22
A2Y8K8	interacts with	A2WUI9
A2XM00	interacts with	Q84JG8
B8BDY2	interacts with	B8BL86
A2XM00	interacts with	B8B8Z9
A2Y8K8	interacts with	B8BL86
A2YPU6	interacts with	A2WRV9
A2YPU6	interacts with	B8B8Z9
A2Y8K8	interacts with	A2ZEW5
A2YPU6	interacts with	B8BL86
A2YPU6	interacts with	A2WL16
A2YPU6	interacts with	A2ZEW5
A2YPU6	interacts with	B8AXH3
A2YPU6	interacts with	Q84JG8
A2Y8K8	interacts with	A2XTX6
A2Y8K8	interacts with	B8AU22
B8AU22	interacts with	A2XW27
B8AU22	interacts with	A2Y8K8
B8AU22	interacts with	A2XM00
B8AU22	interacts with	B8BDY2
B8AU22	interacts with	B8BL86
B8AU22	interacts with	A2XTX6
A2XTX6	interacts with	A2XW27
A2XTX6	interacts with	B8AGW7
A2XTX6	interacts with	A2Y8K8
A2XTX6	interacts with	B8AU22
A2XTX6	interacts with	B8BL86
B8B8Z9	interacts with	A2WUI9
A2WUI9	interacts with	A2WRV9
A2WUI9	interacts with	A2Y8K8
B8B8Z9	interacts with	A2WRV9
A2WUI9	interacts with	A2YPU6
A2WUI9	interacts with	B8BL86
B8B8Z9	interacts with	A2YPU6
B8B8Z9	interacts with	A2WL16
Q84JG8	interacts with	A2WUI9
B8B8Z9	interacts with	A2ZEW5
A2WUI9	interacts with	B8AXH3
B8B8Z9	interacts with	A2XM00
A2WUI9	interacts with	Q84JG8
B8B8Z9	interacts with	B8AXH3
Q84JG8	interacts with	A2WRV9
A2WUI9	interacts with	B8B8Z9
B8B8Z9	interacts with	Q84JG8
A2WUI9	interacts with	A2WL16
A2ZEW5	interacts with	A2XW27
A2WUI9	interacts with	A2XM00
Q84JG8	interacts with	B8B8Z9
A2ZEW5	interacts with	A2YPU6
Q84JG8	interacts with	A2YPU6
Q84JG8	interacts with	A2WL16
Q84JG8	interacts with	A2ZEW5
A2ZEW5	interacts with	A2WL16
A2ZEW5	interacts with	A2WRV9
A2ZEW5	interacts with	A2Y8K8
Q84JG8	interacts with	A2XM00
A2ZEW5	interacts with	Q84JG8
A2ZEW5	interacts with	B8B8Z9
B8BL86	interacts with	A2XW27
Q84JG8	interacts with	B8AXH3
B8BL86	interacts with	A2WUI9
B8BL86	interacts with	A2YPU6
B8BL86	interacts with	A2Y8K8
B8BL86	interacts with	A2XM00
A2WL16	interacts with	A2WUI9
B8BL86	interacts with	B8BDY2
B8BL86	interacts with	A2XTX6
B8BL86	interacts with	B8AU22
A2WL16	interacts with	A2WRV9
A2WL16	interacts with	A2YPU6
A2WL16	interacts with	A2ZEW5
A2WL16	interacts with	B8AXH3
A2WL16	interacts with	Q84JG8
B8AGW7	interacts with	B8BDY2
A2WL16	interacts with	B8B8Z9
B8AGW7	interacts with	A2XTX6
A2XW27	interacts with	A2Y8K8
A2XW27	interacts with	B8AU22
A2XW27	interacts with	B8BL86
A2XW27	interacts with	A2ZEW5
A2XW27	interacts with	A2XM00
A2WRV9	interacts with	A2WUI9
A2XW27	interacts with	A2XTX6
A2WRV9	interacts with	A2YPU6
A2WRV9	interacts with	A2WL16
B8AXH3	interacts with	A2WUI9
A2WRV9	interacts with	A2ZEW5
A2WRV9	interacts with	A2XM00
A2XM00	interacts with	A2XW27
A2WRV9	interacts with	B8AXH3
A2WRV9	interacts with	Q84JG8
A2XM00	interacts with	A2WUI9
B8AXH3	interacts with	A2WRV9
A2WRV9	interacts with	B8B8Z9

## Sheet: Cluster 3
UniprotKB AC/ID	interaction	UniprotKB AC/ID
A2Y4Z1	interacts with	A2YKG1
B8B024	interacts with	A2Y2Z1
B8ADJ1	interacts with	B8B6A7
B8B6A7	interacts with	A2Y4Z1
B8B6A7	interacts with	B8ADJ1
A2YKG1	interacts with	B8B9Z2
B8B6A7	interacts with	A2WWU3
B8B6A7	interacts with	A2YKG1
B8B3G1	interacts with	A2Y5G0
B8B6A7	interacts with	B8AYY8
B8B3G1	interacts with	B8B7L6
A2YKG1	interacts with	A2Y4Z1
A2YKG1	interacts with	B8ADJ1
A2YKG1	interacts with	A2XEP1
A2Y4Z1	interacts with	B8B6A7
A2Y0Q8	interacts with	B8B9Z2
A2XEP1	interacts with	A2Y0Q8
A2YKG1	interacts with	A2Y0Q8
A2XEP1	interacts with	B8B9Z2
A2Y0Q8	interacts with	A2XEP1
B8B3G1	interacts with	A2WWU3
B8B3G1	interacts with	B8AYY8
A2XEP1	interacts with	A2YKG1
B8B3G1	interacts with	A2Y2Z1
A2YKG1	interacts with	B8B024
A2Y5G0	interacts with	B8B3G1
A2Y5G0	interacts with	B8B7L6
A2XEP1	interacts with	B8B024
A2WWU3	interacts with	A2Y5G0
A2Y0Q8	interacts with	A2YKG1
B8B7L6	interacts with	A2Y5G0
A2WWU3	interacts with	B8B3G1
A2YKG1	interacts with	B8B6A7
B8B7L6	interacts with	B8B3G1
A2WWU3	interacts with	B8B7L6
A2Y0Q8	interacts with	B8B024
A2Y5G0	interacts with	B8ADJ1
B8B7L6	interacts with	B8ADJ1
B8AYY8	interacts with	A2Y5G0
B8AYY8	interacts with	B8B3G1
B8AYY8	interacts with	B8B7L6
A2WWU3	interacts with	B8ADJ1
A2Y2Z1	interacts with	B8B3G1
A2Y5G0	interacts with	A2WWU3
B8B7L6	interacts with	A2WWU3
A2Y5G0	interacts with	B8AYY8
B8B7L6	interacts with	B8AYY8
B8AYY8	interacts with	B8ADJ1
A2WWU3	interacts with	B8AYY8
B8B7L6	interacts with	B8B6A7
B8AYY8	interacts with	A2WWU3
A2Y5G0	interacts with	B8B6A7
A2Y2Z1	interacts with	B8B024
B8AYY8	interacts with	B8B6A7
A2WWU3	interacts with	B8B6A7
B8B9Z2	interacts with	A2XEP1
B8B9Z2	interacts with	A2Y0Q8
B8ADJ1	interacts with	A2Y5G0
B8B9Z2	interacts with	A2YKG1
B8ADJ1	interacts with	B8B7L6
B8B024	interacts with	B8B9Z2
B8B9Z2	interacts with	B8B024
B8ADJ1	interacts with	A2WWU3
B8B024	interacts with	A2XEP1
B8ADJ1	interacts with	A2YKG1
B8ADJ1	interacts with	B8AYY8
B8B6A7	interacts with	A2Y5G0
B8B6A7	interacts with	B8B7L6
B8B024	interacts with	A2Y0Q8
B8B024	interacts with	A2YKG1

## Sheet: Cluster 4
UniprotKB AC/ID	interaction	UniprotKB AC/ID
B8BAX7	interacts with	B8BCL9
B8BAX7	interacts with	A2XZ27
A2XNI6	interacts with	Q9LKM2
B8B2E6	interacts with	B8ACK0
A2XZ27	interacts with	Q9LKM2
B8B2E6	interacts with	A2WTG8
A2XNI6	interacts with	A2YZH8
A2XZ27	interacts with	B8ADA5
B8BB65	interacts with	A2YNY5
A2XZ27	interacts with	A2XNI6
B8BB65	interacts with	A2YNY6
A2XZ27	interacts with	A2YY05
B8BB65	interacts with	B8ACK0
B8BB65	interacts with	B8AEP4
A2XZ27	interacts with	B8BAX7
B8B2E6	interacts with	A2XNI6
A2XNI6	interacts with	B8B2E6
A2XZ27	interacts with	A2WVZ2
A2WTG8	interacts with	B8B2E6
B8BB65	interacts with	A2WYZ2
A2XZ27	interacts with	B8AL07
B8BB65	interacts with	A2YNK3
A2XNI6	interacts with	A2WJR2
A2XNI6	interacts with	A2XZ27
A2WTG8	interacts with	B8AL07
A2XNI6	interacts with	A2WVZ2
A2YY05	interacts with	A2WJR2
A2YY05	interacts with	A2XZ27
A2XNI6	interacts with	B8AL07
A2YZH8	interacts with	A2XNI6
A2YY05	interacts with	B8AL07
A2YZH8	interacts with	A2YY05
A2YY05	interacts with	A2YZH8
A2YNK3	interacts with	A2YNY5
A2YNK3	interacts with	A2YNY6
A2YNK3	interacts with	B8ACK0
A2YNK3	interacts with	B8BB65
A2YNK3	interacts with	A2WYZ2
B8ACK0	interacts with	A2YNY5
B8ACK0	interacts with	A2YNK3
B8ACK0	interacts with	B8BB65
B8ACK0	interacts with	B8B2E6
B8ACK0	interacts with	A2YNY6
B8ACK0	interacts with	A2WYZ2
Q9LKM2	interacts with	B8AGJ2
A2WJR2	interacts with	A2XNI6
Q9LKM2	interacts with	A2XNI6
B8AL07	interacts with	B8AGJ2
Q9LKM2	interacts with	B8AB93
Q9LKM2	interacts with	B8AL07
A2WJR2	interacts with	B8AL07
B8AL07	interacts with	A2WTG8
B8AL07	interacts with	B8AEP4
Q9LKM2	interacts with	A2XZ27
B8AL07	interacts with	Q9LKM2
Q9LKM2	interacts with	A2Y5Z6
A2WJR2	interacts with	A2YY05
B8AL07	interacts with	B8AK12
B8AGJ2	interacts with	B8AEP4
B8AGJ2	interacts with	Q9LKM2
B8AEP4	interacts with	B8AGJ2
B8AL07	interacts with	A2XNI6
B8AGJ2	interacts with	B8ADA5
B8AL07	interacts with	A2YY05
A2WVZ2	interacts with	B8AGJ2
B8AGJ2	interacts with	A2WVZ2
B8AL07	interacts with	A2WJR2
B8AGJ2	interacts with	B8AL07
B8AEP4	interacts with	B8BB65
B8AL07	interacts with	A2XZ27
A2WVZ2	interacts with	B8BCL9
B8AGJ2	interacts with	B8BIT2
B8AK12	interacts with	B8AB93
B8AL07	interacts with	A2WVZ2
B8AEP4	interacts with	B8AL07
B8AK12	interacts with	B8AL07
B8AL07	interacts with	B8BIT2
B8AK12	interacts with	A2Y5Z6
A2WVZ2	interacts with	A2XNI6
B8ADA5	interacts with	B8AGJ2
A2WVZ2	interacts with	A2XZ27
A2WVZ2	interacts with	B8AL07
B8ADA5	interacts with	A2XZ27
B8AB93	interacts with	B8AK12
A2WYZ2	interacts with	A2YNY5
A2WYZ2	interacts with	B8ACK0
A2WYZ2	interacts with	A2YNK3
A2WYZ2	interacts with	B8BB65
A2WYZ2	interacts with	A2YNY6
B8BIT2	interacts with	B8AGJ2
B8BIT2	interacts with	B8AL07
B8AB93	interacts with	Q9LKM2
A2Y5Z6	interacts with	B8AK12
A2Y5Z6	interacts with	B8AB93
B8AB93	interacts with	A2Y5Z6
A2Y5Z6	interacts with	Q9LKM2
B8BCL9	interacts with	B8BAX7
A2YNY5	interacts with	B8ACK0
A2YNY5	interacts with	A2YNK3
A2YNY5	interacts with	B8BB65
A2YNY5	interacts with	A2YNY6
A2YNY5	interacts with	A2WYZ2
B8BCL9	interacts with	A2WVZ2
A2YNY6	interacts with	B8ACK0
A2YNY6	interacts with	A2YNK3
A2YNY6	interacts with	B8BB65
A2YNY6	interacts with	A2WYZ2
A2YNY6	interacts with	A2YNY5
